# Supplementary material for: Imidazol-5-ones as a substrate for [1,5]-hydride shift triggered cyclization
Source: Royal Society of Chemistry journal article supplement (doi:10.1039/d0nj05738j), 2021-01-01
Supplement: d0nj05738j1.pdf [file d0nj05738j1.pdf]

## Contents

|                                                                                                                     |    |
|---------------------------------------------------------------------------------------------------------------------|----|
| 1. General information.....                                                                                         | 2  |
| 2. Optimization of 1,1',2-trimethyl-1',4'-dihydro-2'H-spiro[imidazole-4,3'-quinolin]-5(1H)-one (2a) synthesis ..... | 3  |
| 3. Synthesis of the starting materials .....                                                                        | 4  |
| 4. Synthesis of the spirocyclic imidazolones.....                                                                   | 16 |
| 5. Procedure for the gram scale synthesis.....                                                                      | 32 |
| 6. Proof of the reaction reversibility .....                                                                        | 33 |
| 7. Hydrolysis procedure.....                                                                                        | 34 |
| 8. Crystal Data .....                                                                                               | 36 |
| 9. Configuration determination by NMR .....                                                                         | 37 |
| 10. References. ....                                                                                                | 44 |
| 11. Copies of $^1\text{H}$ and $^{13}\text{C}$ NMR spectra .....                                                    | 45 |

## 1. General information

Commercially available reagents were used without additional purification. **1a**,<sup>1</sup> 2-(pyrrolidin-1-yl)benzaldehyde, 2-morpholinobenzaldehyde,<sup>2</sup> 2-(piperidin-1-yl)benzaldehyde,<sup>3</sup> 2-(benzyl(methyl)amino)benzaldehyde, 2-(3,4-dihydroisoquinolin-2(1H)-yl)benzaldehyde,<sup>4</sup> 2-(dimethylamino)-5-methoxybenzaldehyde<sup>5</sup> and 5-methoxy-2-(pyrrolidin-1-yl)benzaldehyde<sup>6</sup> were synthesized according to the literature methods. E. Merck Kieselgel 60 was used for column chromatography. Thin layer chromatography (TLC) was performed on silica gel 60 F<sub>254</sub> glass-backed plates (MERCK). Visualization was effected by UV light (254 or 312 nm) and staining with KMnO<sub>4</sub>.

X-ray data from single crystal of **2'r** was collected with Bruker APEX2 DUO CCD diffractometer, using graphite monochromated Mo-K  $\omega$  radiation. The structures were solved by direct method and refined by the full-matrix least-squares technique against F<sub>2</sub>hkl in the anisotropic-isotropic approximation. Positions of hydrogen atoms were calculated, and they were refined in the isotropic approximation within the riding model. All calculations were performed using SHELXTL PLUS.

NMR spectra were recorded on a 700 MHz Bruker Avance III NMR at 303 K and Avance III 800 (with a 5-mm CPTXI cryoprobe). Chemical shifts are reported relative to residue peaks of CDCl<sub>3</sub> (7.27 ppm for <sup>1</sup>H and 77.0 ppm for <sup>13</sup>C) or DMSO-d<sub>6</sub> (2.51 ppm for <sup>1</sup>H and 39.5 ppm for <sup>13</sup>C). Melting points were measured on a SMP 30 apparatus without correction. High-resolution mass spectra (HRMS) spectra were recorded on a Bruker micrOTOF II instrument using electrospray ionization (ESI). The measurements were done in a positive ion mode (interface capillary voltage – 4500 V) or in a negative ion mode (3200 V); mass range from m/z 50 to m/z 3000; external or internal calibration was done with ESI Tuning Mix, Agilent. A syringe injection was used for solutions in acetonitrile, methanol, or water (flow rate 3 mL/min). Nitrogen was applied as a dry gas; interface temperature was set at 180°C.

## 2. Optimization of 1,1',2-trimethyl-1',4'-dihydro-2'H-spiro[imidazole-4,3'-quinolin]-5(1H)-one (2a) synthesis

### General procedure

Compound **1a** (244 mg, 1 mmol) was dissolved in dry solvent (5 mL) in argon. Then catalyst/promotor was added and the reaction mixture was stirred at the condition listed in Table 1. In case of TiCl<sub>4</sub>, BBr<sub>3</sub>, SnCl<sub>4</sub> and AlCl<sub>3</sub> the solution was precooled to 0°C and then warmed up to room temperature. TiCl<sub>4</sub>, BBr<sub>3</sub>, SnCl<sub>4</sub> was used as solution in CH<sub>2</sub>Cl<sub>2</sub> (2 mL). 3% aqueous solution of NaHCO<sub>3</sub> (50 mL) was carefully added and the resulted mixture was extracted with EtOAc (3×50 mL). Combined organic layers were washed with brine (3×50 mL), dried over anhydrous Na<sub>2</sub>SO<sub>4</sub>. All volatiles were removed in vacuo and the residue was purified with column chromatography (eluent – mixture of hexane and EtOAc, v/v 1:3).

### 3. Synthesis of the starting materials

#### General method for 2-aminobenzaldehyde synthesis

Mixture of the corresponding 2-fluorobenzaldehyde (10 mmol), amine (12 mmol) and  $K_2CO_3$  (2.07 g, 15 mmol) in of freshly distilled DMF (20 mL) was heated at 100°C for 12 h. EtOAc (150 mL) was added and the resulted mixture was washed with brine (3×30 mL). Organic layer was dried over anhydrous  $Na_2SO_4$ , all volatiles were removed in vacuo and the residue was purified with flash chromatography (eluent – mixture of hexane and EtOAc, v/v 10:1).

#### 3-bromo-2-(dimethylamino)benzaldehyde

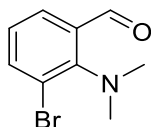

Yield 1.20 g (53%), yellow oil.

$^1H$  NMR (700 MHz,  $DMSO-d_6$ ):  $\delta$  2.83 (s, 6 H), 7.12 (d,  $J=8.4$  Hz, 1 H), 7.15 (d,  $J=7.8$  Hz, 1 H), 7.33 (t,  $J=8.1$  Hz, 1 H), 10.11 (s, 1 H).

$^{13}C$  NMR (176 MHz,  $DMSO-d_6$ ):  $\delta$  44.3, 44.3, 116.9, 116.9, 122.6, 122.6, 123.9, 124.7, 134.1, 134.1, 155.3, 190.1.

HRMS found,  $m/z$ : 228.0018  $[M+H]^+$ .  $C_9H_{11}BrNO^+$ . Calculated,  $m/z$ : 228.0019.

#### 5-methoxy-2-(piperidin-1-yl)benzaldehyde

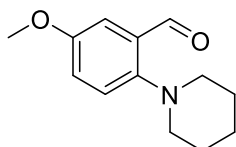

Yield 1.55 g (71%), yellow oil.

$^1H$  NMR (700 MHz,  $DMSO-d_6$ ):  $\delta$  1.53 - 1.58 (m, 2 H), 1.67 - 1.72 (m, 4 H), 2.99 - 3.03 (m, 4 H), 3.84 (s, 3 H), 6.60 (d,  $J=2.3$  Hz, 1 H), 6.68 (dd,  $J=8.6, 2.1$  Hz, 1 H), 7.66 (d,  $J=8.6$  Hz, 1 H), 10.01 (s, 1 H).

$^{13}C$  NMR (176 MHz,  $DMSO-d_6$ ):  $\delta$  23.6, 25.6, 54.7, 55.4, 104.1, 107.8, 121.4, 131.6, 158.3, 164.7, 188.7.

HRMS found,  $m/z$ : 220.1331  $[M+H]^+$ .  $C_{13}H_{18}NO_2^+$ . Calculated,  $m/z$ : 220.1332.

### 3-bromo-2-(piperidin-1-yl)benzaldehyde

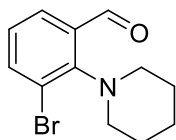

Yield 1.28 g (48%), yellow oil.

$^1\text{H}$  NMR (700 MHz, DMSO- $d_6$ ):  $\delta$  1.53 - 1.57 (m, 2 H), 1.67 (ddd,  $J=11.1, 5.8, 5.6$  Hz, 4 H), 2.97 - 3.00 (m, 4 H), 7.22 (dd,  $J=8.3, 0.7$  Hz, 1 H), 7.32 (d,  $J=7.8$  Hz, 1 H), 7.42 (t,  $J=8.1$  Hz, 1 H), 10.04 (s, 1 H).

$^{13}\text{C}$  NMR (176 MHz, DMSO- $d_6$ ):  $\delta$  23.4, 25.5, 54.4, 118.9, 122.1, 126.8, 134.5, 157.0, 190.3.

HRMS found,  $m/z$ : 268.0333  $[\text{M}+\text{H}]^+$ .  $\text{C}_{12}\text{H}_{15}\text{BrNO}^+$ . Calculated,  $m/z$ : 268.0332.

### 5-methoxy-2-morpholinobenzaldehyde

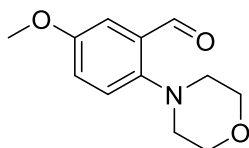

Yield 1.56 g (71%), yellow oil.

$^1\text{H}$  NMR (700 MHz, DMSO- $d_6$ ):  $\delta$  2.99 - 3.07 (m, 4 H), 3.74 - 3.81 (m, 4 H), 3.85 (s, 3 H), 6.63 (d,  $J=2.3$  Hz, 1 H), 6.73 (dd,  $J=8.6, 2.3$  Hz, 1 H), 7.71 (d,  $J=8.6$  Hz, 1 H), 10.04 (s, 1 H).

$^{13}\text{C}$  NMR (176 MHz, DMSO- $d_6$ ):  $\delta$  53.5, 55.5, 66.1, 104.2, 108.2, 121.3, 132.7, 157.0, 164.8, 188.7.

HRMS found,  $m/z$ : 222.1123  $[\text{M}+\text{H}]^+$ .  $\text{C}_{12}\text{H}_{16}\text{NO}_3^+$ . Calculated,  $m/z$ : 222.1125.

### 2-(benzyl(methyl)amino)-5-methoxybenzaldehyde

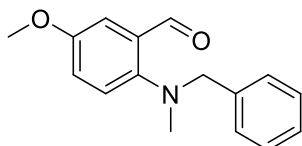

Yield 1.91 g (75%), yellow oil.

$^1\text{H}$  NMR (700 MHz, DMSO- $d_6$ ):  $\delta$  2.78 (s, 3 H), 3.80 (s, 3 H), 4.36 (s, 2 H), 6.60 (d,  $J=2.3$  Hz, 1 H), 6.65 (dd,  $J=8.6, 2.1$  Hz, 1 H), 7.26 (t,  $J=7.2$  Hz, 1 H), 7.28 - 7.31 (m, 2 H), 7.31 - 7.36 (m, 2 H), 7.68 (d,  $J=8.6$  Hz, 1 H), 10.07 (s, 1 H).

$^{13}\text{C}$  NMR (176 MHz, DMSO- $d_6$ ):  $\delta$  42.3, 55.4, 60.6, 104.4, 107.3, 121.0, 127.1, 127.7, 128.4, 132.7, 137.7, 156.8, 164.5, 188.6.

HRMS found,  $m/z$ : 256.1332  $[\text{M}+\text{H}]^+$ .  $\text{C}_{16}\text{H}_{18}\text{NO}_2^+$ . Calculated,  $m/z$ : 256.1332.

### General method for synthesis of 1b-p.

The corresponding aromatic aldehyde (5 mmol) was dissolved in CHCl<sub>3</sub> (25 mL) and mixed with 0.87 ml of 40% aq. methylamine solution (10 mmol) and Na<sub>2</sub>SO<sub>4</sub> (5 g). The mixture was stirred for 48 h at room temperature and filtered. The solvent was evaporated, 1.13 g (7 mmol) of ethyl((1-methoxyamino)acetate) was added and the mixture was stirred for 24 h at room temperature. The solution was evaporated and the residue was purified with column chromatography (eluent – mixture of CHCl<sub>3</sub> and EtOH, v/v 100:1).

### (Z)-5-(2-(dimethylamino)benzylidene)-2-methyl-3-pentyl-3,5-dihydro-4H-imidazol-4-one (1b)

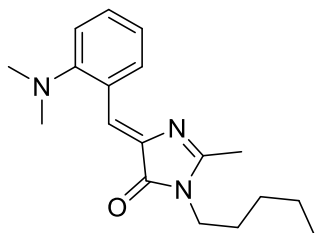

Yield 1.25 g (84%), yellow viscous oil.

<sup>1</sup>H NMR (700 MHz, DMSO-*d*<sub>6</sub>): δ 0.87 (t, *J*=7.2 Hz, 3 H), 1.23 - 1.28 (m, 2 H), 1.32 (quin, *J*=7.2 Hz, 2 H), 1.56 (quin, *J*=7.5 Hz, 2 H), 2.37 (s, 3 H), 2.71 (s, 6 H), 3.55 (t, *J*=7.4 Hz, 2 H), 7.07 (t, *J*=7.5 Hz, 1 H), 7.13 (d, *J*=7.8 Hz, 1 H), 7.25 (s, 1 H), 7.31 - 7.37 (m, 1 H), 8.55 (dd, *J*=7.8, 1.5 Hz, 1 H).

<sup>13</sup>C NMR (176 MHz, DMSO-*d*<sub>6</sub>): δ 13.7, 15.3, 21.6, 28.2, 28.3, 39.8, 45.0, 118.4, 121.5, 122.0, 126.7, 130.6, 132.6, 137.6, 154.6, 163.2, 170.1.

HRMS found, *m/z*: 300.2066 [M+H]<sup>+</sup>. C<sub>18</sub>H<sub>26</sub>N<sub>3</sub>O<sup>+</sup>. Calculated, *m/z*: 300.2070.

**(Z)-3-cyclohexyl-5-(2-(dimethylamino)benzylidene)-2-methyl-3,5-dihydro-4H-imidazol-4-one (1c)**

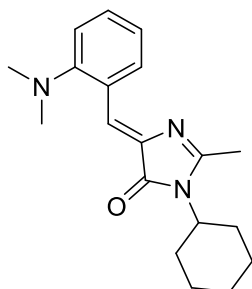

Yield 1.38 g (89%), yellow viscous oil.

$^1\text{H}$  NMR (700 MHz,  $\text{DMSO-}d_6$ ):  $\delta$  1.11 - 1.19 (m, 1 H), 1.28 - 1.37 (m, 2 H), 1.63 (d,  $J=13.2$  Hz, 1 H), 1.73 (d,  $J=12.0$  Hz, 2 H), 1.79 (d,  $J=13.4$  Hz, 2 H), 2.06 (qd,  $J=12.4, 3.7$  Hz, 2 H), 2.39 (s, 3 H), 2.71 (s, 6 H), 3.71 - 3.78 (m, 1 H), 7.06 (t,  $J=7.5$  Hz, 1 H), 7.12 (d,  $J=8.0$  Hz, 1 H), 7.19 (s, 1 H), 7.30 - 7.36 (m, 1 H), 8.53 (dd,  $J=8.0, 1.3$  Hz, 1 H).

$^{13}\text{C}$  NMR (176 MHz,  $\text{DMSO-}d_6$ ):  $\delta$  13C NMR (176 MHz,  $\text{DMSO-}d_6$ )  $\delta$  ppm 16.3, 24.8, 25.4, 29.5, 45.0, 53.2, 118.3, 121.1, 122.0, 126.7, 130.5, 132.5, 137.7, 154.6, 163.4, 170.2.

HRMS found,  $m/z$ : 312.2073  $[\text{M}+\text{H}]^+$ .  $\text{C}_{19}\text{H}_{26}\text{N}_3\text{O}^+$ . Calculated,  $m/z$ : 312.2070.

**(Z)-3-benzyl-5-(2-(dimethylamino)benzylidene)-2-methyl-3,5-dihydro-4H-imidazol-4-one (1d)**

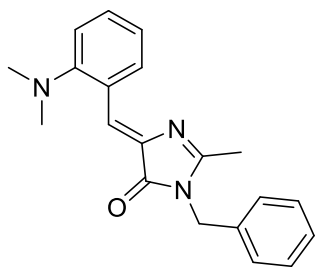

Yield 1.44 g (90%), yellow viscous oil.

$^1\text{H}$  NMR (700 MHz,  $\text{DMSO-}d_6$ ):  $\delta$  2.27 (s, 3 H), 2.73 (s, 6 H), 4.84 (s, 2 H), 7.08 (t,  $J=7.5$  Hz, 1 H), 7.14 (d,  $J=8.2$  Hz, 1 H), 7.26 (d,  $J=7.4$  Hz, 2 H), 7.30 (t,  $J=7.3$  Hz, 1 H), 7.33 - 7.39 (m, 4 H), 8.57 (dd,  $J=7.8, 1.3$  Hz, 1 H).

$^{13}\text{C}$  NMR (176 MHz,  $\text{DMSO-}d_6$ ):  $\delta$  15.5, 43.0, 45.0, 118.4, 122.0, 122.3, 126.6, 126.9, 127.5, 128.8, 130.8, 132.7, 136.7, 137.3, 154.8, 162.8, 170.1.

HRMS found,  $m/z$ : 320.1755  $[\text{M}+\text{H}]^+$ .  $\text{C}_{20}\text{H}_{22}\text{N}_3\text{O}^+$ . Calculated,  $m/z$ : 320.1757.

**(Z)-5-(2-(dimethylamino)benzylidene)-2-ethyl-3-methyl-3,5-dihydro-4H-imidazol-4-one**

**(1e)**

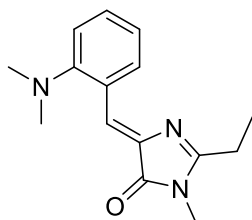

Yield 783 mg (61%), yellow solid, m.p. 120-122°C.

$^1\text{H NMR}$  (700 MHz,  $\text{DMSO-}d_6$ ):  $\delta$  1.26 (t,  $J=7.4$  Hz, 3 H), 2.68 (q,  $J=7.4$  Hz, 2 H), 2.72 (s, 6 H), 3.10 (s, 3 H), 7.08 (t,  $J=7.4$  Hz, 1 H), 7.13 (d,  $J=8.2$  Hz, 1 H), 7.27 (s, 1 H), 7.32 - 7.36 (m, 1 H), 8.59 (dd,  $J=7.8, 1.5$  Hz, 1 H).

$^{13}\text{C NMR}$  (176 MHz,  $\text{DMSO-}d_6$ ):  $\delta$  9.1, 21.3, 25.9, 45.0, 118.3, 121.5, 122.0, 126.8, 130.6, 132.6, 137.8, 154.6, 167.1, 170.3.

HRMS found,  $m/z$ : 258.1602  $[\text{M}+\text{H}]^+$ .  $\text{C}_{15}\text{H}_{20}\text{N}_3\text{O}^+$ . Calculated,  $m/z$ : 258.1601.

**(Z)-5-(2-(dimethylamino)-4-methoxybenzylidene)-2,3-dimethyl-3,5-dihydro-4H-imidazol-4-one (1f)**

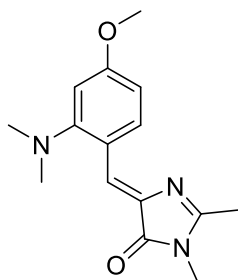

Yield 783 mg (78%), yellow solid, m.p. 134-135°C.

$^1\text{H NMR}$  (700 MHz,  $\text{DMSO-}d_6$ ):  $\delta$  2.33 (s, 3 H) 2.72 (s, 6 H) 3.09 (s, 3 H) 3.80 (s, 3 H) 6.62 (d,  $J=2.5$  Hz, 1 H) 6.69 (dd,  $J=8.8, 2.3$  Hz, 1 H) 7.19 (s, 1 H) 8.58 (d,  $J=8.8$  Hz, 1 H).

$^{13}\text{C NMR}$  (176 MHz,  $\text{DMSO-}d_6$ ):  $\delta$  15.2, 26.1, 44.9, 55.2, 104.2, 108.1, 119.5, 121.6, 134.2, 135.9, 156.6, 161.5, 162.1, 170.0.

HRMS found,  $m/z$ : 274.1546  $[\text{M}+\text{H}]^+$ .  $\text{C}_{15}\text{H}_{20}\text{N}_3\text{O}_2^+$ . Calculated,  $m/z$ : 274.1550.



**(Z)-5-(2-(dimethylamino)-4-methoxybenzylidene)-2-methyl-3-pentyl-3,5-dihydro-4H-imidazol-4-one (1g)**

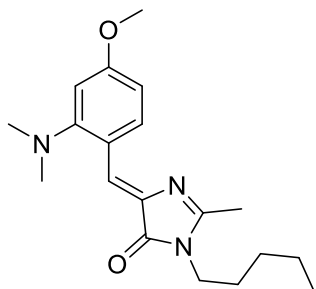

Yield 1.53 g (93%), yellow viscous oil.

$^1\text{H}$  NMR (700 MHz,  $\text{DMSO-}d_6$ ):  $\delta$  0.87 (t,  $J=7.2$  Hz, 3 H), 1.22 - 1.28 (m, 2 H), 1.31 (quin,  $J=7.2$  Hz, 2 H), 1.55 (quin,  $J=7.5$  Hz, 2 H), 2.35 (s, 3 H), 2.72 (s, 6 H), 3.54 (t,  $J=7.4$  Hz, 2 H), 3.81 (s, 3 H), 6.62 (d,  $J=2.5$  Hz, 1 H), 6.69 (dd,  $J=8.9, 2.4$  Hz, 1 H), 7.19 (s, 1 H), 8.59 (d,  $J=9.0$  Hz, 1 H).

$^{13}\text{C}$  NMR (176 MHz,  $\text{DMSO-}d_6$ ):  $\delta$  13.8, 15.2, 21.7, 28.3, 28.3, 44.9, 55.2, 104.2, 108.1, 119.5, 121.7, 134.3, 135.7, 156.7, 161.5, 161.6, 170.0.

HRMS found,  $m/z$ : 330.2174  $[\text{M}+\text{H}]^+$ .  $\text{C}_{19}\text{H}_{28}\text{N}_3\text{O}_2^+$ . Calculated,  $m/z$ : 330.2176.

**(Z)-5-(2-bromo-6-(dimethylamino)benzylidene)-2,3-dimethyl-3,5-dihydro-4H-imidazol-4-one (1h)**

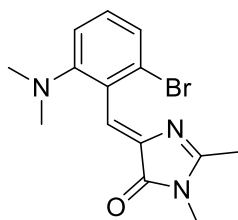

Yield 1.10 g (69%), yellow viscous oil.

$^1\text{H}$  NMR (700 MHz,  $\text{DMSO-}d_6$ ):  $\delta$  2.25 (s, 3 H), 2.60 (s, 7 H), 3.09 (s, 3 H), 6.99 (s, 1 H), 7.09 (d,  $J=8.0$  Hz, 1 H), 7.21 (t,  $J=8.0$  Hz, 1 H), 7.24 - 7.27 (m, 1 H).

$^{13}\text{C}$  NMR (176 MHz,  $\text{DMSO-}d_6$ ):  $\delta$  15.2, 26.2, 43.8, 117.2, 123.6, 124.9, 125.3, 127.9, 130.1, 141.2, 154.5, 164.0, 168.8.

HRMS found,  $m/z$ : 322.0551  $[\text{M}+\text{H}]^+$ .  $\text{C}_{14}\text{H}_{17}\text{BrN}_3\text{O}^+$ . Calculated,  $m/z$ : 322.0550.

**(Z)-5-(2-bromo-6-(dimethylamino)benzylidene)-2-ethyl-3-methyl-3,5-dihydro-4H-imidazol-4-one (1i)**

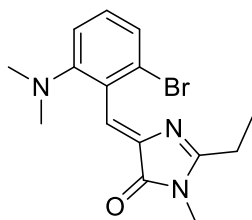

Yield 783 mg (61%), yellow viscous oil.

$^1\text{H}$  NMR (700 MHz,  $\text{DMSO-}d_6$ ):  $\delta$  1.13 (t,  $J=7.3$  Hz, 3 H), 2.59 - 2.61 (m, 2 H), 2.61 (s, 6 H), 3.09 (s, 3 H), 7.00 (s, 1 H), 7.10 (d,  $J=7.1$  Hz, 1 H), 7.20 - 7.23 (m, 1 H), 7.23 - 7.26 (m, 1 H).

$^{13}\text{C}$  NMR (176 MHz,  $\text{DMSO-}d_6$ ):  $\delta$  9.1, 21.3, 26.0, 43.6, 117.4, 123.8, 124.9, 125.2, 127.4, 130.2, 140.8, 154.6, 167.3, 169.2.

HRMS found,  $m/z$ : 336.0700  $[\text{M}+\text{H}]^+$ .  $\text{C}_{15}\text{H}_{19}\text{BrN}_3\text{O}^+$ . Calculated,  $m/z$ : 336.0706.

**(Z)-2,3-dimethyl-5-(2-(pyrrolidin-1-yl)benzylidene)-3,5-dihydro-4H-imidazol-4-one (1j)**

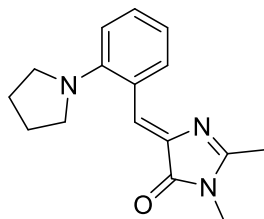

Yield 768 mg (57%), yellow viscous oil.

$^1\text{H}$  NMR (700 MHz,  $\text{DMSO-}d_6$ ):  $\delta$  1.88 - 1.92 (m, 4 H), 2.33 (s, 3 H), 3.09 (s, 3 H), 3.23 (t,  $J=6.4$  Hz, 4 H), 6.88 (t,  $J=7.3$  Hz, 1 H), 6.94 (d,  $J=8.4$  Hz, 1 H), 7.17 (s, 1 H), 7.21 - 7.25 (m, 1 H), 8.40 (dd,  $J=7.8, 1.5$  Hz, 1 H).

$^{13}\text{C}$  NMR (176 MHz,  $\text{DMSO-}d_6$ ):  $\delta$  15.2, 24.9, 26.2, 52.5, 115.6, 119.2, 123.1, 123.5, 130.4, 132.9, 136.4, 151.2, 162.9, 169.9.

HRMS found,  $m/z$ : 270.1596  $[\text{M}+\text{H}]^+$ .  $\text{C}_{16}\text{H}_{20}\text{N}_3\text{O}^+$ . Calculated,  $m/z$ : 270.1601.

**(Z)-5-(4-methoxy-2-(pyrrolidin-1-yl)benzylidene)-2,3-dimethyl-3,5-dihydro-4H-imidazol-4-one (1k)**

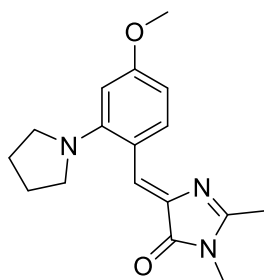

Yield 910 mg (61%), yellow solid, m.p. 117-119°C.

<sup>1</sup>H NMR (700 MHz, DMSO-*d*<sub>6</sub>): δ 1.88 - 1.92 (m, 4 H), 2.32 (s, 3 H), 3.08 (s, 3 H), 3.24 - 3.28 (m, 4 H), 3.78 (s, 3 H), 6.42 (d, *J*=2.5 Hz, 1 H), 6.52 (dd, *J*=8.8, 2.3 Hz, 1 H), 7.15 (s, 1 H), 8.48 (d, *J*=8.8 Hz, 1 H).

<sup>13</sup>C NMR (176 MHz, DMSO-*d*<sub>6</sub>): δ 15.1, 24.9, 26.1, 52.5, 55.0, 100.7, 105.9, 116.2, 123.7, 134.3, 134.6, 153.1, 161.2, 161.5, 169.8.

HRMS found, *m/z*: 300.1706 [M+H]<sup>+</sup>. C<sub>17</sub>H<sub>22</sub>N<sub>3</sub>O<sub>2</sub><sup>+</sup>. Calculated, *m/z*: 300.1707.

**(Z)-2,3-dimethyl-5-(2-(piperidin-1-yl)benzylidene)-3,5-dihydro-4H-imidazol-4-one (1l)**

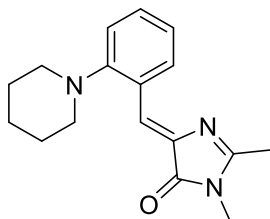

Yield 1.04 g (74%), yellow solid, m.p. 172-174°C.

<sup>1</sup>H NMR (700 MHz, DMSO-*d*<sub>6</sub>): δ 1.56 (br. s., 2 H), 1.65 - 1.74 (m, 4 H), 2.34 (s, 3 H), 2.83 - 2.90 (m, 4 H), 3.10 (s, 3 H), 7.05 - 7.13 (m, 2 H), 7.27 (s, 1 H), 7.32 - 7.37 (m, 1 H), 8.54 (dd, *J*=7.8, 1.3 Hz, 1 H).

<sup>13</sup>C NMR (176 MHz, DMSO-*d*<sub>6</sub>): δ 15.2, 23.6, 25.9, 26.2, 54.1, 118.7, 121.0, 122.2, 127.1, 130.6, 132.5, 138.1, 154.5, 163.6, 170.0.

HRMS found, *m/z*: 284.1755 [M+H]<sup>+</sup>. C<sub>17</sub>H<sub>22</sub>N<sub>3</sub>O<sup>+</sup>. Calculated, *m/z*: 284.1757.

**(Z)-2-ethyl-3-methyl-5-(2-(piperidin-1-yl)benzylidene)-3,5-dihydro-4H-imidazol-4-one**

**(1m)**

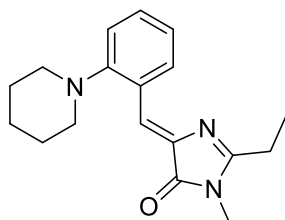

Yield 756 mg (51%), yellow solid, m.p. 140-142°C.

$^1\text{H NMR}$  (700 MHz,  $\text{DMSO-}d_6$ ):  $\delta$  1.25 (t,  $J=7.4$  Hz, 3 H), 1.56 (br. s., 2 H), 1.69 (dq,  $J=5.8, 5.6$  Hz, 4 H), 2.68 (q,  $J=7.2$  Hz, 2 H), 2.82 - 2.91 (m, 5 H), 3.10 (s, 3 H), 7.07 - 7.12 (m, 2 H), 7.28 (s, 1 H), 7.32 - 7.36 (m, 1 H), 8.59 (dd,  $J=7.7, 1.4$  Hz, 1 H).

$^{13}\text{C NMR}$  (176 MHz,  $\text{DMSO-}d_6$ ):  $\delta$  9.1, 21.3, 23.6, 25.9, 54.1, 118.7, 121.1, 122.2, 127.2, 130.6, 132.5, 138.0, 154.6, 167.0, 170.3.

HRMS found,  $m/z$ : 298.1913  $[\text{M}+\text{H}]^+$ .  $\text{C}_{18}\text{H}_{24}\text{N}_3\text{O}^+$ . Calculated,  $m/z$ : 298.1914.

**(Z)-5-(4-methoxy-2-(piperidin-1-yl)benzylidene)-2,3-dimethyl-3,5-dihydro-4H-imidazol-4-one (1n)**

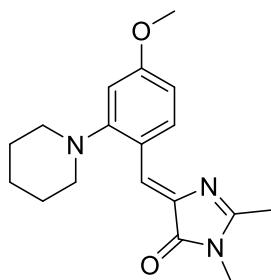

Yield 1.15 g (74%), yellow solid, m.p. 148-150°C.

$^1\text{H NMR}$  (700 MHz,  $\text{DMSO-}d_6$ ):  $\delta$  1.56 (br. s., 2 H), 1.67 - 1.72 (m, 4 H), 2.32 (s, 3 H), 2.85 - 2.89 (m, 4 H), 3.09 (s, 3 H), 3.80 (s, 3 H), 6.59 (d,  $J=2.5$  Hz, 1 H), 6.71 (dd,  $J=8.8, 2.3$  Hz, 1 H), 7.20 (s, 1 H), 8.58 (d,  $J=8.8$  Hz, 1 H).

$^{13}\text{C NMR}$  (176 MHz,  $\text{DMSO-}d_6$ ):  $\delta$  15.1, 23.6, 25.9, 26.1, 54.1, 55.1, 104.6, 108.2, 119.9, 121.2, 134.0, 136.1, 156.6, 161.5, 162.0, 170.0.

HRMS found,  $m/z$ : 314.1863  $[\text{M}+\text{H}]^+$ .  $\text{C}_{18}\text{H}_{24}\text{N}_3\text{O}_2^+$ . Calculated,  $m/z$ : 314.1863.

**(Z)-5-(2-bromo-6-(piperidin-1-yl)benzylidene)-2,3-dimethyl-3,5-dihydro-4H-imidazol-4-one (1o)**

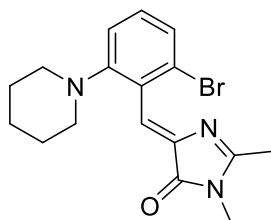

Yield 1.06 g (59%), yellow solid, m.p. 71-73°C.

$^1\text{H}$  NMR (700 MHz, DMSO- $d_6$ ):  $\delta$  1.43 (br. s., 1 H), 1.47 - 1.50 (m, 4 H), 2.26 (s, 3 H), 2.77 - 2.81 (m, 4 H), 3.09 (s, 3 H), 6.97 (s, 1 H), 7.07 (d,  $J=8.0$  Hz, 1 H), 7.24 (t,  $J=8.0$  Hz, 1 H), 7.29 (d,  $J=7.25$  Hz, 1 H).

$^{13}\text{C}$  NMR (176 MHz, DMSO- $d_6$ ):  $\delta$  15.1, 23.5, 25.8, 26.2, 52.9, 79.1, 118.0, 123.3, 124.0, 126.2, 129.6, 130.3, 141.2, 154.7, 163.7, 168.8.

HRMS found,  $m/z$ : 362.0864  $[\text{M}+\text{H}]^+$ .  $\text{C}_{17}\text{H}_{21}\text{BrN}_3\text{O}^+$ . Calculated,  $m/z$ : 362.0863.

**(Z)-2,3-dimethyl-5-(2-morpholinobenzylidene)-3,5-dihydro-4H-imidazol-4-one (1p)**

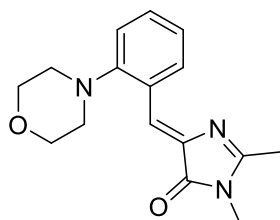

Yield 1.14 g (80%), yellow solid, m.p. 138-140°C.

$^1\text{H}$  NMR (700 MHz, DMSO- $d_6$ ):  $\delta$  2.32 (s, 3 H), 2.89 - 2.92 (m, 4 H), 3.09 (s, 3 H), 3.76 - 3.79 (m, 4 H), 3.81 (s, 3 H), 6.64 (d,  $J=2.5$  Hz, 1 H), 6.76 (dd,  $J=8.8, 2.5$  Hz, 1 H), 7.20 (s, 1 H), 8.59 (d,  $J=9.0$  Hz, 1 H).

$^{13}\text{C}$  NMR (176 MHz, DMSO- $d_6$ )  $\delta$  ppm 15.2, 26.2, 53.1, 66.3, 118.7, 120.6, 122.8, 127.1, 130.7, 132.6, 138.4, 153.2, 164.0, 170.0.

HRMS found,  $m/z$ : 286.1546  $[\text{M}+\text{H}]^+$ .  $\text{C}_{16}\text{H}_{20}\text{N}_3\text{O}_2^+$ . Calculated,  $m/z$ : 286.1550.

**(Z)-5-(4-methoxy-2-morpholinobenzylidene)-2,3-dimethyl-3,5-dihydro-4H-imidazol-4-one (1q)**

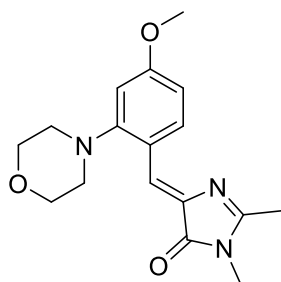

Yield 1.16 g (74%), yellow solid, m.p. 141-143°C.

$^1\text{H}$  NMR (700 MHz,  $\text{DMSO-}d_6$ ):  $\delta$  2.32 (s, 3 H) 2.89 - 2.92 (m, 4 H) 3.09 (s, 3 H) 3.76 - 3.79 (m, 4 H) 3.81 (s, 3 H) 6.64 (d,  $J=2.5$  Hz, 1 H) 6.76 (dd,  $J=8.8, 2.5$  Hz, 1 H) 7.20 (s, 1 H) 8.59 (d,  $J=9.0$  Hz, 1 H).

$^{13}\text{C}$  NMR (176 MHz,  $\text{DMSO-}d_6$ ):  $\delta$  15.2, 26.1, 53.1, 55.2, 66.3, 104.7, 108.8, 119.8, 120.7, 134.2, 136.4, 155.2, 161.6, 162.5, 169.9.

HRMS found,  $m/z$ : 316.1654  $[\text{M}+\text{H}]^+$ .  $\text{C}_{17}\text{H}_{22}\text{N}_3\text{O}_3^+$ . Calculated,  $m/z$ : 316.1656.

**(Z)-5-(2-(benzyl(methyl)amino)benzylidene)-2,3-dimethyl-3,5-dihydro-4H-imidazol-4-one (1r)**

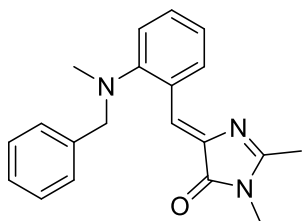

Yield 1.07 g (67%), yellow solid, m.p. 125-127°C.

$^1\text{H}$  NMR (700 MHz,  $\text{DMSO-}d_6$ ):  $\delta$  2.35 (s, 3 H), 2.61 (s, 3 H), 3.10 (s, 3 H), 4.09 (s, 2 H), 7.11 (t,  $J=7.4$  Hz, 1 H), 7.15 (d,  $J=8.0$  Hz, 1 H), 7.24 - 7.27 (m, 1 H), 7.30 - 7.34 (m, 6 H), 7.50 (s, 1 H), 8.57 (dd,  $J=7.7, 1.1$  Hz, 1 H).

$^{13}\text{C}$  NMR (176 MHz,  $\text{DMSO-}d_6$ ):  $\delta$  15.3, 26.2, 41.6, 61.1, 120.0, 121.2, 122.6, 127.1, 127.6, 128.2, 128.4, 130.5, 132.6, 137.8, 138.3, 153.5, 163.9, 170.0.

HRMS found,  $m/z$ : 320.1754  $[\text{M}+\text{H}]^+$ .  $\text{C}_{20}\text{H}_{22}\text{N}_3\text{O}^+$ . Calculated,  $m/z$ : 320.1757.

**(Z)-5-(2-(benzyl(methyl)amino)-4-methoxybenzylidene)-2,3-dimethyl-3,5-dihydro-4H-imidazol-4-one (1s)**

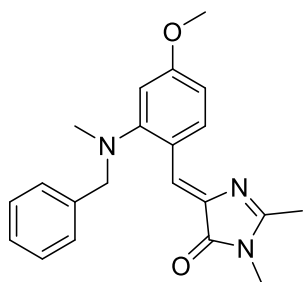

Yield 1.36 g (78%), yellow solid, m.p. 98-100°C.

$^1\text{H}$  NMR (700 MHz, DMSO- $d_6$ ):  $\delta$  2.33 (s, 3 H), 2.61 (s, 3 H), 3.09 (s, 3 H), 3.78 (s, 3 H), 4.11 (s, 2 H), 6.66 (d,  $J=2.5$  Hz, 1 H), 6.74 (dd,  $J=8.8, 2.48$  Hz, 1 H), 7.25 - 7.28 (m, 1 H), 7.32 - 7.35 (m, 4 H), 7.44 (s, 1 H), 8.62 (d,  $J=8.8$  Hz, 1 H).

$^{13}\text{C}$  NMR (176 MHz, DMSO- $d_6$ ):  $\delta$  15.2, 26.1, 41.7, 55.2, 60.9, 106.0, 108.6, 120.4, 121.3, 127.1, 128.2, 128.4, 134.2, 136.4, 137.8, 155.6, 161.4, 162.3, 170.0.

HRMS found,  $m/z$ : 350.1866  $[\text{M}+\text{H}]^+$ .  $\text{C}_{21}\text{H}_{24}\text{N}_3\text{O}_2^+$ . Calculated,  $m/z$ : 350.1863.

**(Z)-5-(2-(3,4-dihydroisoquinolin-2(1H)-yl)benzylidene)-2,3-dimethyl-3,5-dihydro-4H-imidazol-4-one (1t)**

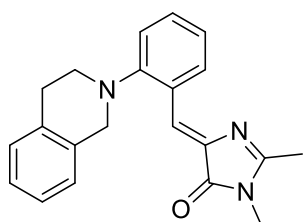

Yield 776 mg (47%), yellow viscous oil.

$^1\text{H}$  NMR (700 MHz, DMSO- $d_6$ ):  $\delta$  2.36 (s, 3 H), 2.98 (t,  $J=5.3$  Hz, 2 H), 3.09 (s, 3 H), 3.21 (t,  $J=5.6$  Hz, 2 H), 4.19 (s, 2 H), 7.13 - 7.24 (m, 6 H), 7.27 (s, 1 H), 7.39 (t,  $J=7.6$  Hz, 1 H), 8.59 (d,  $J=9.0$  Hz, 1 H).

$^{13}\text{C}$  NMR (176 MHz, DMSO- $d_6$ ):  $\delta$  15.3, 26.2, 28.8, 52.2, 53.8, 119.0, 120.7, 122.6, 125.7, 126.3, 126.4, 128.1, 128.7, 128.8, 130.7, 132.6, 134.5, 138.3, 153.2, 163.9, 170.0.

HRMS found,  $m/z$ : 332.1758  $[\text{M}+\text{H}]^+$ .  $\text{C}_{21}\text{H}_{22}\text{N}_3\text{O}^+$ . Calculated,  $m/z$ : 332.1757.

## 4. Synthesis of the spirocyclic imidazolones

### General method for synthesis of 2a-p

Compound **1** (1 mmol) was dissolved in dry CH<sub>2</sub>Cl<sub>2</sub> (20 mL) in argon and cooled to 0°C. Solution of TiCl<sub>4</sub> (285 mg, 1.5 mmol) in 2 mL of dry CH<sub>2</sub>Cl<sub>2</sub> was added dropwise, the resulted mixture was stirred at the same temperature for 30 min and then was warmed to RT. Stirring was continued until no starting material was detected with TLC (typically 3 h, 12 h for **2k** and **2l**). 3% aqueous solution of NaHCO<sub>3</sub> (50 mL) was carefully added and the resulted mixture was extracted with EtOAc (3×50 mL). Combined organic layers were washed with brine (3×50 mL), dried over anhydrous Na<sub>2</sub>SO<sub>4</sub>. All volatiles were removed in vacuo and the residue was purified with column chromatography (eluent – mixture of hexane and EtOAc, v/v 1:3).

### 1,1',2-trimethyl-1',4'-dihydro-2'H-spiro[imidazole-4,3'-quinolin]-5(1H)-one (**2a**)

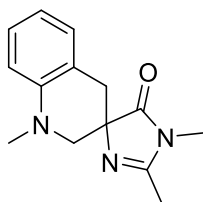

Yield 230 mg (95%), dark solid, m.p. 88–90°C.

<sup>1</sup>H NMR (700 MHz, DMSO-*d*<sub>6</sub>): δ 2.14 (s, 3 H), 2.44 (dd, *J* = 15.6, 2.1 Hz, 1 H), 2.86 (s, 3 H), 2.89–2.95 (m, 2 H), 3.01 (s, 3 H), 3.32 (d, *J* = 11.8 Hz, 1 H), 6.54 (td, *J* = 7.3, 1.1 Hz, 1 H), 6.62 (dd, *J* = 8.3, 1.1 Hz, 1 H), 6.89 (dd, *J* = 7.4, 1.4 Hz, 1 H), 7.04 (t, *J* = 7.8, 1.5 Hz, 1 H).

<sup>13</sup>C NMR (176 MHz, DMSO-*d*<sub>6</sub>): δ 15.1, 26.3, 35.0, 38.5, 55.6, 66.3, 110.4, 115.6, 119.3, 127.0, 128.6, 144.8, 160.9, 182.6.

HRMS found, *m/z*: 244.1441 [M+H]<sup>+</sup>. C<sub>14</sub>H<sub>18</sub>N<sub>3</sub>O<sup>+</sup>. Calculated, *m/z*: 244.1444.



**1',2-dimethyl-1-pentyl-1',4'-dihydro-2'H-spiro[imidazole-4,3'-quinolin]-5(1H)-one (2b)**

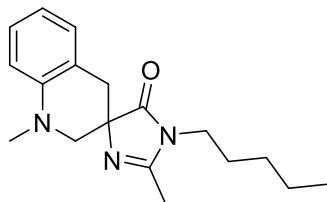

Yield 157 mg (53%), dark viscous oil.

$^1\text{H}$  NMR (700 MHz,  $\text{DMSO-}d_6$ ):  $\delta$  0.88 (t,  $J=7.2$  Hz, 3 H), 1.22 - 1.25 (m, 2 H), 1.28 - 1.34 (m, 2 H), 1.52 (quin,  $J=7.5$  Hz, 2 H), 2.16 (s, 3 H), 2.42 (dd,  $J=15.8, 2.3$  Hz, 1 H), 2.86 (s, 3 H), 2.89 - 2.96 (m, 2 H), 3.33 (d,  $J=11.6$  Hz, 1 H), 3.45 (t,  $J=7.3$  Hz, 2 H), 6.54 (t,  $J=7.2$  Hz, 1 H), 6.62 (d,  $J=8.0$  Hz, 1 H), 6.90 (d,  $J=7.2$  Hz, 1 H), 7.04 (t,  $J=7.6$  Hz, 1 H).

$^{13}\text{C}$  NMR (176 MHz,  $\text{DMSO-}d_6$ ):  $\delta$  14.3, 15.7, 22.2, 28.6, 28.7, 35.7, 39.0, 40.3, 56.2, 66.7, 111.0, 116.1, 119.8, 127.5, 129.2, 145.4, 161.0, 183.3.

HRMS found,  $m/z$ : 300.2073  $[\text{M}+\text{H}]^+$ .  $\text{C}_{18}\text{H}_{26}\text{N}_3\text{O}^+$ . Calculated,  $m/z$ : 300.2070.

**1-cyclohexyl-1',2-dimethyl-1',4'-dihydro-2'H-spiro[imidazole-4,3'-quinolin]-5(1H)-one**

**(2c)**

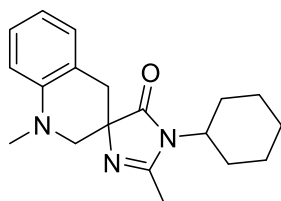

Yield 240 mg (77%), dark solid, m.p. 130–132°C.

$^1\text{H}$  NMR (700 MHz,  $\text{DMSO-}d_6$ ):  $\delta$  1.08 - 1.16 (m, 1 H), 1.26 - 1.34 (m, 2 H), 1.62 (d,  $J=12.8$  Hz, 1 H), 1.70 (d,  $J=12.2$  Hz, 2 H), 1.77 (d,  $J=13.4$  Hz, 2 H), 2.00 (qd,  $J=12.6, 3.3$  Hz, 2 H), 2.18 (s, 3 H), 2.39 (dd,  $J=15.6, 2.3$  Hz, 1 H), 2.86 (s, 3 H), 2.87 - 2.93 (m, 2 H), 3.30 (d,  $J=11.4$  Hz, 1 H), 3.60 (tt,  $J=12.2, 3.6$  Hz, 1 H), 6.53 (t,  $J=7.2$  Hz, 1 H), 6.61 (d,  $J=8.0$  Hz, 1 H), 6.89 (d,  $J=7.2$  Hz, 1 H), 7.03 (t,  $J=7.3$  Hz, 1 H).

$^{13}\text{C}$  NMR (176 MHz,  $\text{DMSO-}d_6$ ):  $\delta$  24.7, 25.3, 29.2, 29.3, 35.2, 38.5, 53.1, 55.7, 65.8, 110.4, 115.6, 119.4, 127.0, 128.6, 144.8, 160.7, 183.1.

HRMS found,  $m/z$ : 312.2068  $[\text{M}+\text{H}]^+$ .  $\text{C}_{19}\text{H}_{26}\text{N}_3\text{O}^+$ . Calculated,  $m/z$ : 312.2070.

**1-benzyl-1',2-dimethyl-1',4'-dihydro-2'H-spiro[imidazole-4,3'-quinolin]-5(1H)-one (2d)**

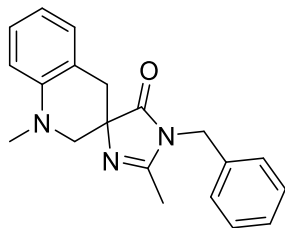

Yield 155 mg (49%), dark viscous oil.

$^1\text{H}$  NMR (700 MHz,  $\text{DMSO-}d_6$ ):  $\delta$  2.03 (s, 3 H), 2.89 (s, 3 H), 2.99 - 3.04 (m, 2 H), 3.41 (d,  $J=11.8$  Hz, 1 H), 4.73 (s, 2 H), 6.52 - 6.57 (m, 1 H), 6.64 (d,  $J=8.0$  Hz, 1 H), 6.93 (d,  $J=7.1$  Hz, 1 H), 7.05 (t,  $J=7.7$  Hz, 1 H), 7.23 (d,  $J=7.1$  Hz, 2 H), 7.31 (t,  $J=7.4$  Hz, 1 H), 7.39 (t,  $J=7.6$  Hz, 2 H).

$^{13}\text{C}$  NMR (176 MHz,  $\text{DMSO-}d_6$ ):  $\delta$  15.4, 35.2, 38.5, 42.8, 59.7, 66.4, 110.5, 115.7, 119.2, 126.6, 127.1, 127.5, 128.7, 128.8, 136.8, 144.8, 160.2, 182.8.

HRMS found,  $m/z$ : 320.1760  $[\text{M}+\text{H}]^+$ .  $\text{C}_{20}\text{H}_{22}\text{N}_3\text{O}^+$ . Calculated,  $m/z$ : 320.1757.

**2-ethyl-1,1'-dimethyl-1',4'-dihydro-2'H-spiro[imidazole-4,3'-quinolin]-5(1H)-one (2e)**

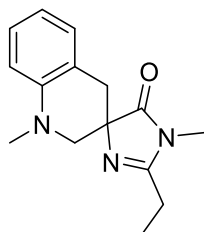

Yield 59 mg (23%), dark solid, m.p. 86–88°C.

$^1\text{H}$  NMR (700 MHz,  $\text{DMSO-}d_6$ ):  $\delta$  1.09 (t,  $J = 7.4$  Hz, 3 H), 2.46 (dd,  $J = 15.8, 2.3$  Hz, 1 H), 2.55–2.58 (m, 2H), 2.86 (s, 3 H), 2.89–2.96 (m, 2 H), 3.01 (s, 3 H), 3.27 (d,  $J = 11.5$  Hz, 1 H), 6.55 (t,  $J = 7.2$  Hz, 1 H), 6.64 (d,  $J = 8.0$  Hz, 1 H), 6.90 (d,  $J = 7.2$  Hz, 1 H), 7.05 (t,  $J = 7.5$  Hz, 1 H).

$^{13}\text{C}$  NMR (201 MHz,  $\text{DMSO-}d_6$ ):  $\delta$  9.1, 21.3, 26.1, 35.0, 38.7, 55.7, 66.3, 110.8, 115.8, 119.5, 127.0, 128.7, 145.0, 164.4, 182.8.

HRMS found,  $m/z$ : 258.1599  $[\text{M}+\text{H}]^+$ .  $\text{C}_{15}\text{H}_{20}\text{N}_3\text{O}^+$ . Calculated,  $m/z$ : 258.1601.

**7'-methoxy-1,1',2-trimethyl-1',4'-dihydro-2'H-spiro[imidazole-4,3'-quinolin]-5(1H)-one**

(2f)

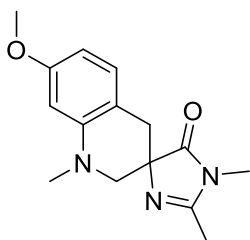

Yield 193 mg (71%), dark viscous oil.

$^1\text{H}$  NMR (700 MHz,  $\text{DMSO-}d_6$ ):  $\delta$  2.14 (s, 3 H), 2.38 (d,  $J = 16.0$  Hz, 1 H), 2.83–2.86 (m, 4 H), 2.91 (dd,  $J = 11.2, 1.8$  Hz, 1 H), 3.00 (s, 3 H), 3.30–3.32 (m, 1 H), 3.70 (s, 3 H), 6.14 (dd,  $J = 8.1, 2.4$  Hz, 1 H), 6.15 (d,  $J = 2.4$  Hz, 1 H), 6.78 (d,  $J = 8.1$  Hz, 1 H).

$^{13}\text{C}$  NMR (176 MHz,  $\text{DMSO-}d_6$ ):  $\delta$  15.1, 26.3, 34.4, 38.5, 54.8, 55.5, 66.4, 96.9, 100.7, 111.9, 129.1, 145.7, 159.0, 182.6.

HRMS found,  $m/z$ : 274.1550  $[\text{M}+\text{H}]^+$ .  $\text{C}_{15}\text{H}_{20}\text{N}_3\text{O}_2^+$ . Calculated,  $m/z$ : 274.1550.

**7'-methoxy-1',2-dimethyl-1-pentyl-1',4'-dihydro-2'H-spiro[imidazole-4,3'-quinolin]-5(1H)-one (2g)**

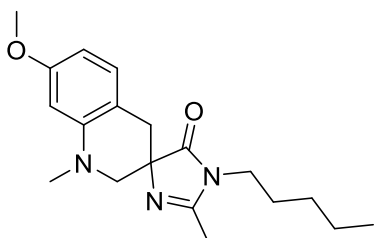

Yield 92 mg (28%), dark viscous oil.

$^1\text{H}$  NMR (700 MHz,  $\text{DMSO-}d_6$ ):  $\delta$  0.87 (t,  $J=7.2$  Hz, 3 H), 1.22 - 1.25 (m, 2 H), 1.28 - 1.34 (m, 2 H), 1.52 (quin,  $J=7.5$  Hz, 2 H), 2.15 (s, 3 H), 2.36 (dd,  $J=15.5, 2.2$  Hz, 1 H), 2.83 - 2.87 (m, 4 H), 2.89 (dd,  $J=11.7, 2.4$  Hz, 1 H), 3.31 (d,  $J=11.8$  Hz, 1 H), 3.42 - 3.46 (m, 2 H), 3.70 (s, 3 H), 6.13 (dd,  $J=8.1, 2.4$  Hz, 1 H), 6.15 (d,  $J=2.3$  Hz, 1 H), 6.79 (d,  $J=8.0$  Hz, 1 H).

$^{13}\text{C}$  NMR (176 MHz,  $\text{DMSO-}d_6$ ):  $\delta$  13.8, 15.2, 21.6, 28.1, 28.2, 34.5, 38.5, 39.7, 54.8, 55.5, 66.3, 96.9, 100.7, 111.9, 129.1, 145.6, 159.0, 160.4, 182.8.

HRMS found,  $m/z$ : 330.2179  $[\text{M}+\text{H}]^+$ .  $\text{C}_{19}\text{H}_{28}\text{N}_3\text{O}_2^+$ . Calculated,  $m/z$ : 330.2176.

**5'-bromo-1,1',2-trimethyl-1',4'-dihydro-2'H-spiro[imidazole-4,3'-quinolin]-5(1H)-one**

**(2h)**

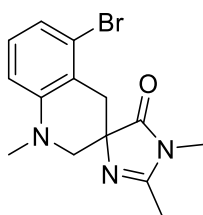

Yield 190 mg (57%), dark solid, m.p. 143–145°C.

$^1\text{H}$  NMR (700 MHz, DMSO- $d_6$ ):  $\delta$  2.15 (s, 3 H), 2.59 (dd,  $J = 16.4, 2.4$  Hz, 1 H), 2.78 (d,  $J = 16.4$  Hz, 1 H), 2.90 (s, 3 H), 2.99 (dd,  $J = 11.9, 2.4$  Hz, 1 H), 3.02 (s, 3 H), 3.32 (d,  $J = 11.9$  Hz, 1 H), 6.65 (d,  $J = 8.3$  Hz, 1 H), 6.83 (d,  $J = 7.8$  Hz, 1 H), 6.99 (t,  $J = 8.1$  Hz, 1 H).

$^{13}\text{C}$  NMR (176 MHz, DMSO- $d_6$ ):  $\delta$  15.1, 26.4, 35.8, 55.0, 65.9, 110.1, 118.2, 119.1, 124.5, 128.2, 146.7, 161.4, 182.3.

HRMS found,  $m/z$ : 336.0703  $[\text{M}+\text{H}]^+$ .  $\text{C}_{15}\text{H}_{19}\text{BrN}_3\text{O}^+$ . Calculated,  $m/z$ : 336.0706.

**5'-bromo-2-ethyl-1,1'-dimethyl-1',4'-dihydro-2'H-spiro[imidazole-4,3'-quinolin]-5(1H)-one (2i)**

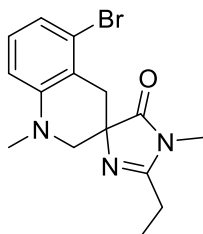

Yield 79 mg (29%), dark solid, m.p. 127–129°C.

$^1\text{H}$  NMR (700 MHz, DMSO- $d_6$ ):  $\delta$  1.10 (t,  $J = 7.3$  Hz, 3 H), 2.56–2.59 (m, 3 H), 2.78 (d,  $J = 16.8$  Hz, 1 H), 2.90 (s, 3 H), 2.98–3.03 (m, 4 H), 3.28 (d,  $J = 11.8$  Hz, 1 H), 6.68 (d,  $J = 8.3$  Hz, 1 H), 6.85 (d,  $J = 7.9$  Hz, 1 H), 7.00 (t,  $J = 8.1$  Hz, 1 H).

$^{13}\text{C}$  NMR (176 MHz,  $\text{CDCl}_3$ ), 10.3, 22.6, 26.7, 36.3, 39.9, 55.9, 67.2, 110.8, 119.0, 120.9, 125.5, 128.0, 146.7, 164.9, 183.3.

HRMS found,  $m/z$ : 274.1550  $[\text{M}+\text{H}]^+$ .  $\text{C}_{15}\text{H}_{20}\text{N}_3\text{O}_2^+$ . Calculated,  $m/z$ : 274.1550.

**1,2-dimethyl-1',2',3',3a'-tetrahydro-5'H-spiro[imidazole-4,4'-pyrrolo[1,2-a]quinolin]-5(1H)-one (2j and 2'j)**

**(3a'R\*,4R\*)-1,2-dimethyl-2',3',3a',5'-tetrahydro-1'H-spiro[imidazole-4,4'-pyrrolo[1,2-a]quinolin]-5(1H)-one (2j):**

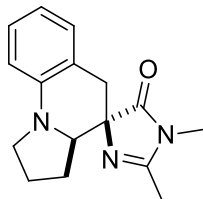

Yield 145 mg (55%), dark solid, m.p. 70–72°C.

<sup>1</sup>H NMR (700 MHz, DMSO-*d*<sub>6</sub>): δ 1.07–1.14 (m, 1 H), 1.61 (dtd, *J* = 11.4, 6.3, 1.9 Hz, 1 H), 1.82–1.95 (m, 2 H), 2.15 (s, 3 H), 2.44 (d, *J* = 15.4 Hz, 1 H), 2.98–3.05 (m, 5 H), 3.46 (td, *J* = 8.5, 1.5 Hz, 1 H), 3.61 (dd, *J* = 9.5, 5.9 Hz, 1 H), 6.45 (d, *J* = 8.0 Hz, 1 H), 6.48 (t, *J* = 7.2 Hz, 1 H), 6.91 (d, *J* = 7.4 Hz, 1 H), 7.02 (t, *J* = 7.7 Hz, 1 H).

<sup>13</sup>C NMR (176 MHz, DMSO-*d*<sub>6</sub>): δ 14.9, 23.0, 25.6, 26.3, 36.5, 47.4, 61.1, 65.8, 110.4, 114.7, 118.6, 127.0, 128.5, 143.5, 161.5, 181.7.

HRMS found, *m/z*: 270.1603 [M+H]<sup>+</sup>. C<sub>16</sub>H<sub>20</sub>N<sub>3</sub>O<sup>+</sup>. Calculated, *m/z*: 270.1601.

**(3a'R\*,4S\*)-1,2-dimethyl-2',3',3a',5'-tetrahydro-1'H-spiro[imidazole-4,4'-pyrrolo[1,2-a]quinolin]-5(1H)-one (2'j):**

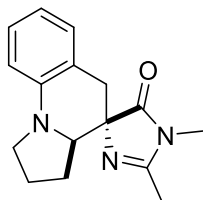

Yield 35 mg (13%), dark viscous oil.

<sup>1</sup>H NMR (700 MHz, DMSO-*d*<sub>6</sub>): δ 1.05 - 1.14 (m, 1 H), 1.80 - 1.92 (m, 3 H), 2.20 (s, 3 H), 2.50 - 2.52 (m, 1H), 2.90 (s, 3 H), 3.05 - 3.11 (m, 1 H), 3.12 (d, *J*=16.0 Hz, 1 H), 3.46 (td, *J*=8.1, 1.2 Hz, 1 H), 3.73 (dd, *J*=9.4, 5.6 Hz, 1 H), 6.43 (d, *J*=8.0 Hz, 1 H), 6.48 (t, *J*=7.2 Hz, 1 H), 6.89 (d, *J*=7.2 Hz, 1 H), 7.01 (t, *J*=7.7 Hz, 1 H).

<sup>13</sup>C NMR (201 MHz, DMSO-*d*<sub>6</sub>): δ 15.1, 22.8, 25.7, 27.2, 35.5, 47.7, 61.3, 66.7, 110.3, 114.8, 117.4, 126.9, 128.4, 143.9, 161.0, 180.2.

HRMS found, *m/z*: 270.1604 [M+H]<sup>+</sup>. C<sub>16</sub>H<sub>20</sub>N<sub>3</sub>O<sup>+</sup>. Calculated, *m/z*: 270.1601.

**8'-methoxy-1,2-dimethyl-1',2',3',3a'-tetrahydro-5'H-spiro[imidazole-4,4'-pyrrolo[1,2-a]quinolin]-5(1H)-one (2k and 2'k)**

**(3a'R\*,4R\*)-8'-methoxy-1,2-dimethyl-2',3',3a',5'-tetrahydro-1'H-spiro[imidazole-4,4'-pyrrolo[1,2-a]quinolin]-5(1H)-one (2k):**

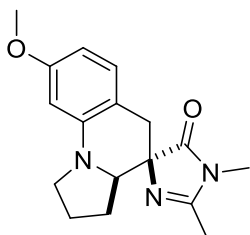

Yield 90 mg (30%), dark viscous oil.

$^1\text{H}$  NMR (700 MHz,  $\text{DMSO-}d_6$ ):  $\delta$  1.05–1.13 (m, 1 H), 1.60 (dt,  $J = 11.8, 6.4$  Hz, 1 H), 1.82–1.94 (m, 2 H), 2.14 (s, 3 H), 2.39 (d,  $J = 15.4$  Hz, 1 H), 2.95 (d,  $J = 15.4$  Hz, 1 H), 2.99–3.03 (m, 4 H), 3.43 (td,  $J = 8.8, 2.2$  Hz, 1 H), 3.58 (dd,  $J = 9.6, 5.8$  Hz, 1 H), 3.69 (s, 3 H), 6.00 (d,  $J = 2.5$  Hz, 1 H), 6.08 (dd,  $J = 8.1, 2.5$  Hz, 1 H), 6.80 (d,  $J = 8.1$  Hz, 1 H).

$^{13}\text{C}$  NMR (176 MHz,  $\text{DMSO-}d_6$ ):  $\delta$  14.9, 23.0, 25.6, 26.3, 36.5, 47.4, 54.8, 61.1, 65.8, 96.6, 100.0, 111.3, 128.9, 144.4, 159.0, 161.5, 183.3.

HRMS found,  $m/z$ : 300.1707  $[\text{M}+\text{H}]^+$ .  $\text{C}_{17}\text{H}_{22}\text{N}_3\text{O}_2^+$ . Calculated,  $m/z$ : 300.1707.

**(3a'R\*,4S\*)-8'-methoxy-1,2-dimethyl-2',3',3a',5'-tetrahydro-1'H-spiro[imidazole-4,4'-pyrrolo[1,2-a]quinolin]-5(1H)-one (2'k):**

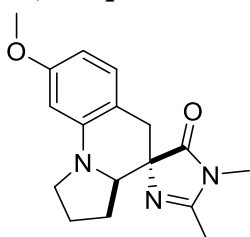

Yield 27 mg (9%), dark viscous oil.

$^1\text{H}$  NMR (700 MHz,  $\text{DMSO-}d_6$ ):  $\delta$  1.82 - 1.86 (m, 2 H), 1.87 - 1.91 (m, 1 H), 2.19 (s, 3 H), 2.89 (s, 3 H), 3.01 - 3.07 (m, 2 H), 3.07 - 3.10 (m, 1 H), 3.42 - 3.46 (m, 1 H), 3.69 (s, 3 H), 3.70 - 3.72 (m, 1 H), 5.98 (d,  $J=2.5$  Hz, 1 H), 6.08 (dd,  $J=8.0, 2.5$  Hz, 1 H), 6.78 (d,  $J=8.4$  Hz, 1 H).

$^{13}\text{C}$  NMR (201 MHz,  $\text{DMSO-}d_6$ ):  $\delta$  22.8, 25.7, 27.3, 30.4, 35.0, 47.7, 54.7, 61.3, 67.0, 96.6, 100.1, 110.1, 128.9, 144.8, 158.9, 161.0, 180.2.

HRMS found,  $m/z$ : 300.1704  $[\text{M}+\text{H}]^+$ .  $\text{C}_{17}\text{H}_{22}\text{N}_3\text{O}_2^+$ . Calculated,  $m/z$ : 300.1707.

**1,2-dimethyl-2',3',4',4a'-tetrahydro-1*H*,6'*H*-spiro[imidazole-4,5'-pyrido[1,2-a]quinolin]-5(1*H*)-one (2l and 2'l)**

**(4*R*\*,4a'*R*\*)-1,2-dimethyl-1',2',3',4',4a',6'-hexahydrospiro[imidazole-4,5'-pyrido[1,2-a]quinolin]-5(1*H*)-one (2l):**

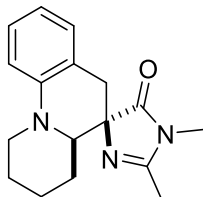

Yield 62 mg (22%), dark viscous oil.

<sup>1</sup>H NMR (700 MHz, DMSO-*d*<sub>6</sub>): δ 0.95–1.04 (m, 1 H), 1.18 (d, *J* = 12.2 Hz, 1 H), 1.25–1.34 (m, 1 H), 1.38–1.46 (m, 1 H), 1.68 (app. d, *J* = 11.3 Hz, 2 H), 2.16 (s, 3 H), 2.33 (d, *J* = 15.6 Hz, 1 H), 2.66 (td, *J* = 12.4, 2.0 Hz, 1 H), 3.00 (s, 3 H), 3.02 (d, *J* = 15.6 Hz, 1 H), 3.07 (dd, *J* = 11.3, 2.5 Hz, 1 H), 4.02 (dt, *J* = 12.5, 3.2 Hz, 1 H), 6.56 (t, *J* = 7.3 Hz, 1 H), 6.85 (d, *J* = 7.4 Hz, 1 H), 6.87 (d, *J* = 8.3 Hz, 1 H), 7.02 (t, *J* = 7.8 Hz, 1 H).

<sup>13</sup>C NMR (201 MHz, DMSO-*d*<sub>6</sub>): δ 15.0, 23.1, 25.1, 25.7, 26.2, 36.4, 48.0, 59.6, 70.2, 113.0, 116.7, 120.8, 126.9, 128.9, 145.4, 161.3, 182.8.

HRMS found, *m/z*: 284.1757 [M+H]<sup>+</sup>. C<sub>17</sub>H<sub>22</sub>N<sub>3</sub>O<sup>+</sup>. Calculated, *m/z*: 284.1757.

**(4*S*\*,4a'*R*\*)-1,2-dimethyl-1',2',3',4',4a',6'-hexahydrospiro[imidazole-4,5'-pyrido[1,2-a]quinolin]-5(1*H*)-one (2'l):**

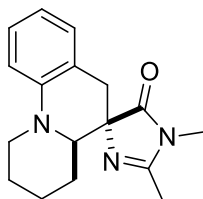

Yield 139 mg (49%), dark viscous oil.

<sup>1</sup>H NMR (700 MHz, DMSO-*d*<sub>6</sub>): δ 1.03–1.13 (m, 1 H), 1.36–1.46 (m, 2 H), 1.50–1.58 (m, 1 H), 1.75 (app. d, *J* = 10.5 Hz, 2 H), 2.15 (s, 3 H), 2.63 (d, *J* = 16.0 Hz, 1 H), 2.72 (td, *J* = 12.5, 2.5 Hz, 1 H), 2.80 (d, *J* = 16.0 Hz, 1 H), 2.95 (s, 3 H), 2.97 (ddd, *J* = 12.2, 2.0, 0.8 Hz, 1 H), 4.04 (dt, *J* = 13.4, 3.2 Hz, 1 H), 6.54 (t, *J* = 7.2 Hz, 1 H), 6.84 (d, *J* = 8.2 Hz, 1 H), 6.87 (dd, *J* = 7.4, 1.7 Hz, 1 H), 7.02 (td, *J* = 7.7, 1.7 Hz, 1 H).

<sup>13</sup>C NMR (176 MHz, DMSO-*d*<sub>6</sub>): δ 15.0, 23.8, 24.0, 25.2, 26.0, 33.4, 47.9, 60.4, 69.0, 112.0, 116.2, 119.5, 127.0, 129.0, 144.4, 160.6, 181.2.

HRMS found, *m/z*: 284.1755 [M+H]<sup>+</sup>. C<sub>17</sub>H<sub>22</sub>N<sub>3</sub>O<sup>+</sup>. Calculated, *m/z*: 284.1757.

**2-ethyl-1-methyl-2',3',4',4a'-tetrahydro-1'H,6'H-spiro[imidazole-4,5'-pyrido[1,2-a]quinolin]-5(1H)-one (2m and 2'm)**

**(4R\*,4a'R\*)-2-ethyl-1-methyl-1',2',3',4',4a',6'-hexahydrospiro[imidazole-4,5'-pyrido[1,2-a]quinolin]-5(1H)-one (2m):**

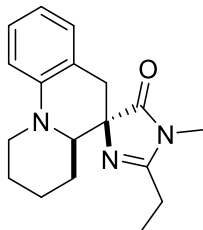

Yield 68 mg (23%), dark viscous oil.

$^1\text{H NMR}$  (700 MHz,  $\text{DMSO-}d_6$ ):  $\delta$  1.10 (t,  $J=7.4$  Hz, 3 H), 1.14 – 1.19 (m, 1 H), 1.25 – 1.32 (m, 1 H), 1.38 - 1.47 (m, 1 H), 1.65 – 1.70 (m, 2 H), 2.33 (d,  $J=15.8$  Hz, 1 H), 2.53 (q,  $J=7.4$  Hz, 2 H), 2.61 - 2.70 (m, 1 H), 3.01 (s, 3 H), 3.05 (dd,  $J=11.3, 8.5$  Hz, 1 H), 3.99 - 4.06 (m, 1 H), 6.57 (t,  $J=7.2$  Hz, 1 H), 6.83 - 6.92 (m, 2 H), 7.03 (t,  $J=7.7$  Hz, 1 H).

$^{13}\text{C NMR}$  (176 MHz,  $\text{DMSO-}d_6$ ):  $\delta$  9.6, 21.4, 23.1, 25.1, 25.6, 26.0, 36.3, 48.0, 59.5, 70.0, 113.0, 116.8, 120.8, 126.9, 129.0, 145.4, 165.0, 183.1.

HRMS found,  $m/z$ : 298.1910  $[\text{M}+\text{H}]^+$ .  $\text{C}_{18}\text{H}_{24}\text{N}_3\text{O}^+$ . Calculated,  $m/z$ : 298.1914.

**(4S\*,4a'R\*)-2-ethyl-1-methyl-1',2',3',4',4a',6'-hexahydrospiro[imidazole-4,5'-pyrido[1,2-a]quinolin]-5(1H)-one (2'm):**

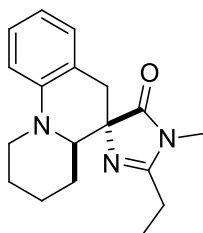

Yield 222 mg (75%), dark viscous oil.

$^1\text{H NMR}$  (700 MHz,  $\text{DMSO-}d_6$ ):  $\delta$  1.01 (qd,  $J = 12.3, 3.4$  Hz, 1 H), 1.13 (t,  $J = 7.3$  Hz, 3 H), 1.30–1.47 (m, 2 H), 1.55–1.59 (m, 1 H), 1.67–1.77 (m, 2 H), 2.70 (td,  $J = 12.7, 2.7$  Hz, 1 H), 2.72 (d,  $J = 16.1$  Hz, 1 H), 2.75 (d,  $J = 16.1$  Hz, 1 H), 2.94 (s, 3 H), 3.00 (dd,  $J = 11.6, 2.2$  Hz, 1 H), 4.04 (dt,  $J = 13.6, 3.0$  Hz, 1 H), 6.56 (t,  $J = 7.3$  Hz, 1 H), 6.85 (d,  $J = 8.4$  Hz, 1 H), 6.87 (dd,  $J = 7.4, 1.6$  Hz, 1 H), 7.03 (ddd,  $J = 8.4, 7.2, 1.6$  Hz, 1 H).

$^{13}\text{C NMR}$  (176 MHz,  $\text{DMSO-}d_6$ ):  $\delta$  9.1, 21.3, 23.9, 24.0, 25.3, 25.8, 33.9, 47.9, 60.3, 68.8, 112.2, 116.4, 119.5, 126.9, 129.0, 144.8, 164.4, 181.3.

HRMS found,  $m/z$ : 298.1914  $[\text{M}+\text{H}]^+$ .  $\text{C}_{18}\text{H}_{24}\text{N}_3\text{O}^+$ . Calculated,  $m/z$ : 298.1914.



**9'-methoxy-1,2-dimethyl-2',3',4',4a'-tetrahydro-1'H,6'H-spiro[imidazole-4,5'-pyrido[1,2-a]quinolin]-5(1H)-one (2n and 2'n)**

**(4R\*,4a'R\*)-9'-methoxy-1,2-dimethyl-1',2',3',4',4a',6'-hexahydrospiro[imidazole-4,5'-pyrido[1,2-a]quinolin]-5(1H)-one (2n):**

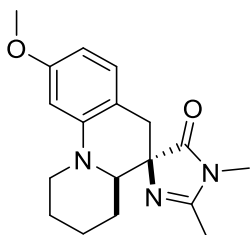

Yield 37 mg (12%), dark viscous oil.

$^1\text{H}$  NMR (700 MHz, DMSO- $d_6$ ):  $\delta$  0.98 (dd,  $J=11.7, 3.1$  Hz, 1 H), 1.16 (d,  $J=2.9$  Hz, 1 H), 1.25 - 1.32 (m, 1 H), 1.38 - 1.45 (m, 1 H), 1.67 (d,  $J=12.0$  Hz, 2 H), 2.16 (s, 3 H), 2.28 (d,  $J=15.3$  Hz, 1 H), 2.62 - 2.68 (m, 1 H), 2.93 (d,  $J=15.3$  Hz, 1 H), 2.99 (s, 3 H), 3.04 (dd,  $J=11.3, 2.4$  Hz, 1 H), 3.69 (s, 3 H), 3.98 (d,  $J=12.4$  Hz, 1 H), 6.17 (dd,  $J=8.1, 2.4$  Hz, 1 H), 6.41 (d,  $J=2.3$  Hz, 1 H), 6.74 (d,  $J=8.2$  Hz, 1 H).

$^{13}\text{C}$  NMR (176 MHz, DMSO- $d_6$ ):  $\delta$  15.0, 23.1, 25.1, 25.7, 26.1, 35.7, 48.1, 54.9, 59.5, 70.3, 99.3, 102.3, 113.4, 129.3, 146.3, 158.8, 161.2, 182.9.

HRMS found,  $m/z$ : 314.1861  $[\text{M}+\text{H}]^+$ .  $\text{C}_{18}\text{H}_{24}\text{N}_3\text{O}_2^+$ . Calculated,  $m/z$ : 314.1863.

**(4S\*,4a'R\*)-9'-methoxy-1,2-dimethyl-1',2',3',4',4a',6'-hexahydrospiro[imidazole-4,5'-pyrido[1,2-a]quinolin]-5(1H)-one (2'n):**

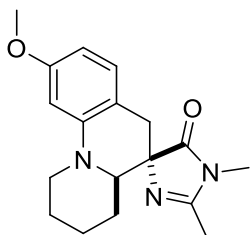

Yield 178 mg (57%), dark solid, m.p. 73–75°C.

$^1\text{H}$  NMR (700 MHz, DMSO- $d_6$ ):  $\delta$  1.02–1.10 (m, 1 H), 1.35–1.46 (m, 2 H), 1.51–1.56 (m, 1 H), 1.71–1.79 (m, 2 H), 2.14 (s, 3 H), 2.55 (d,  $J = 15.8$  Hz, 1 H), 2.69–2.76 (m, 2 H), 2.93–2.97 (m, 4 H), 3.69 (s, 3 H), 4.01 (dt,  $J = 13.4, 3.6$  Hz, 1 H), 6.16 (dd,  $J = 8.2, 2.4$  Hz, 1 H), 6.36 (d,  $J = 2.4$  Hz, 1 H), 6.77 (d,  $J = 8.2$  Hz, 1 H).

$^{13}\text{C}$  NMR (176 MHz, DMSO- $d_6$ ):  $\delta$  15.0, 23.8, 24.0, 25.2, 26.0, 32.8, 48.0, 54.8, 60.4, 69.0, 98.4, 101.7, 112.1, 129.5, 145.3, 159.0, 160.6, 181.2.

HRMS found,  $m/z$ : 314.1863  $[\text{M}+\text{H}]^+$ .  $\text{C}_{18}\text{H}_{24}\text{N}_3\text{O}_2^+$ . Calculated,  $m/z$ : 314.1863.

**7'-bromo-1,2-dimethyl-2',3',4',4a'-tetrahydro-1'H,6'H-spiro[imidazole-4,5'-pyrido[1,2-a]quinolin]-5(1H)-one (2o and 2'o)**

**(4R\*,4a'R\*)-7'-bromo-1,2-dimethyl-1',2',3',4',4a',6'-hexahydrospiro[imidazole-4,5'-pyrido[1,2-a]quinolin]-5(1H)-one (2o):**

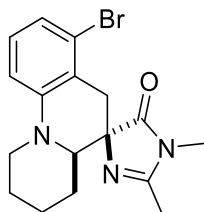

Yield 36 mg (10%), dark viscous oil.

$^1\text{H}$  NMR (700 MHz,  $\text{DMSO-}d_6$ ):  $\delta$  1.00 (qd,  $J = 12.9, 3.8$  Hz, 1 H), 1.20–1.34 (m, 2 H), 1.37–1.48 (m, 1 H), 1.62–1.72 (m, 2 H), 2.18 (s, 3 H), 2.55 (d,  $J = 16.1$  Hz, 1 H), 2.69 (td,  $J = 12.5, 2.7$  Hz, 1 H), 2.83 (d,  $J = 16.1$  Hz, 1 H), 3.01 (s, 3 H), 3.08 (dd,  $J = 11.3, 2.7$  Hz, 1 H), 4.01 (dt,  $J = 12.6, 3.0$  Hz, 1 H), 6.87 (dd,  $J = 7.7, 1.0$  Hz, 1 H), 6.93 (dd,  $J = 8.4, 1.0$  Hz, 1 H), 6.98 (t,  $J = 8.1$  Hz, 1 H).

$^{13}\text{C}$  NMR (201 MHz,  $\text{DMSO-}d_6$ ):  $\delta$  15.0, 22.7, 24.9, 25.5, 26.3, 36.8, 48.4, 58.7, 69.8, 112.7, 119.9, 120.3, 124.6, 128.1, 147.6, 161.9, 182.5.

HRMS found,  $m/z$ : 362.0865  $[\text{M}+\text{H}]^+$ .  $\text{C}_{17}\text{H}_{21}\text{BrN}_3\text{O}^+$ . Calculated,  $m/z$ : 362.0863.

**(4S\*,4a'R\*)-7'-bromo-1,2-dimethyl-1',2',3',4',4a',6'-hexahydrospiro[imidazole-4,5'-pyrido[1,2-a]quinolin]-5(1H)-one (2'o):**

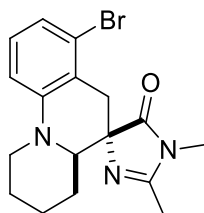

Yield 205 mg (57%), dark viscous oil.

$^1\text{H}$  NMR (700 MHz,  $\text{DMSO-}d_6$ ):  $\delta$  1.02–1.11 (m, 1 H), 1.38–1.45 (m, 2 H), 1.49–1.54 (m, 1 H), 1.73–1.78 (m, 1 H), 1.79–1.84 (m, 1 H), 2.16 (s, 3 H), 2.60 (d,  $J = 16.6$  Hz, 1 H), 2.76–2.82 (m, 2 H), 2.97 (s, 3 H), 3.01 (dd,  $J = 11.7, 2.9$  Hz, 1 H), 4.07 (dt,  $J = 13.4, 3.8$  Hz, 1 H), 6.84 (d,  $J = 7.8, 1.0$  Hz, 1 H), 6.90 (dd,  $J = 8.4, 1.0$  Hz, 1 H), 6.98 (t,  $J = 8.1$  Hz, 1 H).

$^{13}\text{C}$  NMR (176 MHz,  $\text{DMSO-}d_6$ ):  $\delta$  15.1, 23.4, 23.9, 24.7, 26.2, 33.9, 48.4, 59.9, 68.5, 79.1, 111.6, 118.5, 119.7, 124.8, 128.3, 146.2, 161.1, 181.1.

HRMS found,  $m/z$ : 362.0864  $[\text{M}+\text{H}]^+$ .  $\text{C}_{17}\text{H}_{21}\text{BrN}_3\text{O}^+$ . Calculated,  $m/z$ : 362.0863.

**1,2-dimethyl-1',2',4',4a'-tetrahydro-6'H-spiro[imidazole-4,5'-[1,4]oxazino[4,3-a]quinolin]-5(1H)-one (2p and 2'p)**

**(4aR\*,4'S\*)-1',2'-dimethyl-2,4,4a,6-tetrahydro-1H-spiro[[1,4]oxazino[4,3-a]quinoline-5,4'-imidazol]-5'(1'H)-one (2p):**

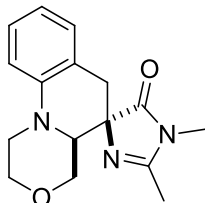

Yield 68 mg (24%), dark viscous oil.

$^1\text{H}$  NMR (700 MHz, DMSO- $d_6$ ):  $\delta$  2.16 (s, 3 H), 2.36 (d,  $J = 15.8$  Hz, 1 H), 2.82 (td,  $J = 12.1, 3.7$  Hz, 1 H), 2.95 (t,  $J = 10.7$  Hz, 1 H), 3.01 (s, 3 H), 3.06 (d,  $J = 15.8$  Hz, 1 H), 3.23 (dd,  $J = 10.6, 3.1$  Hz, 1 H), 3.35 (ddd,  $J = 11.3, 3.7, 0.8$  Hz, 1 H), 3.47 (td,  $J = 11.6, 3.0$  Hz, 1 H), 3.81 (ddd,  $J = 12.6, 3.0, 0.8$  Hz, 1 H), 3.87 (dd,  $J = 11.3, 3.1$  Hz, 1 H), 6.64 (t,  $J = 7.4$  Hz, 1 H), 6.84 (d,  $J = 8.4$  Hz, 1 H), 6.90 (d,  $J = 7.5$  Hz, 1 H), 7.07 (t,  $J = 7.8$  Hz, 1 H).

$^{13}\text{C}$  NMR (176 MHz, DMSO- $d_6$ ):  $\delta$  15.0, 26.3, 36.5, 46.1, 57.5, 66.0, 66.1, 67.9, 79.1, 112.2, 117.5, 120.5, 127.0, 129.1, 144.5, 161.8, 182.1.

HRMS found,  $m/z$ : 286.1551  $[\text{M}+\text{H}]^+$ .  $\text{C}_{16}\text{H}_{20}\text{N}_3\text{O}_2^+$ . Calculated,  $m/z$ : 286.1550.

**(4aS\*,4'S\*)-1',2'-dimethyl-2,4,4a,6-tetrahydro-1H-spiro[[1,4]oxazino[4,3-a]quinoline-5,4'-imidazol]-5'(1'H)-one (2'p):**

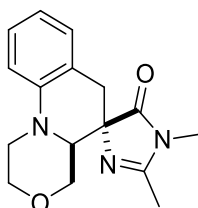

Yield 74 mg (26%), dark viscous oil.

$^1\text{H}$  NMR (700 MHz, DMSO- $d_6$ ):  $\delta$  2.17 (s, 3 H), 2.61 (d,  $J = 16.0$  Hz, 1 H), 2.82 (td,  $J = 12.2, 3.6$  Hz, 1 H), 2.93 (s, 3 H), 2.96 (d,  $J = 16.0$  Hz, 1 H), 3.03 (t,  $J = 10.9$  Hz, 1 H), 3.22 (dd,  $J = 10.6, 3.1$  Hz, 1 H), 3.45 (td,  $J = 11.7, 2.8$  Hz, 1 H), 3.66 (dd,  $J = 11.0, 3.1$  Hz, 1 H), 3.79 (ddd,  $J = 12.4, 2.8, 1.5$  Hz, 1 H), 3.86 (ddd,  $J = 11.5, 3.6, 1.5$  Hz, 1 H), 6.66 (t,  $J = 7.3$  Hz, 1 H), 6.87 (d,  $J = 8.2$  Hz, 1 H), 6.91 (d,  $J = 7.3$  Hz, 1 H), 7.07 (t,  $J = 7.8$  Hz, 1 H).

$^{13}\text{C}$  NMR (176 MHz, DMSO- $d_6$ ):  $\delta$  15.1, 26.0, 34.5, 46.4, 58.2, 65.9, 66.4, 67.1, 112.0, 117.8, 119.9, 126.9, 128.9, 144.8, 161.8, 180.3.

HRMS found,  $m/z$ : 286.1551  $[\text{M}+\text{H}]^+$ .  $\text{C}_{16}\text{H}_{20}\text{N}_3\text{O}_2^+$ . Calculated,  $m/z$ : 286.1551.

**9'-methoxy-1,2-dimethyl-1',2',4',4a'-tetrahydro-6'H-spiro[imidazole-4,5'-[1,4]oxazino[4,3-a]quinolin]-5(1H)-one (2q and 2'q)**  
**(4aR\*,4'R\*)-9-methoxy-1',2'-dimethyl-2,4,4a,6-tetrahydro-1H-spiro[[1,4]oxazino[4,3-a]quinoline-5,4'-imidazol]-5'(1'H)-one (2q):**

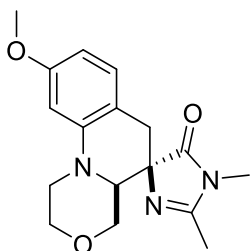

Yield 78 mg (25%), dark viscous oil.

$^1\text{H}$  NMR (700 MHz, DMSO- $d_6$ ):  $\delta$  2.15 (s, 3 H), 2.30 (d,  $J=16.2$  Hz, 1 H), 2.82 (td,  $J=12.2$ , 3.6 Hz, 1 H), 2.94 (t,  $J=10.2$  Hz, 1 H), 2.97 (d,  $J=16.2$  Hz, 1 H), 3.00 (s, 3 H), 3.21 (dd,  $J=10.5$ , 3.2 Hz, 1 H), 3.35 (d,  $J=2.9$  Hz, 1 H), 3.43 - 3.48 (m, 1 H), 3.70 (s, 3 H), 3.80 (d,  $J=13.5$  Hz, 1 H), 3.86 (dd,  $J=11.1$ , 2.7 Hz, 1 H), 6.25 (dd,  $J=8.1$ , 2.4 Hz, 1 H), 6.43 (d,  $J=2.3$  Hz, 1 H), 6.80 (d,  $J=8.0$  Hz, 1 H).

$^{13}\text{C}$  NMR (201 MHz, DMSO- $d_6$ ):  $\delta$  15.0, 26.3, 35.9, 46.1, 54.9, 57.5, 58.0, 66.0, 66.1, 68.0, 98.6, 103.0, 113.0, 129.5, 145.4, 158.9, 161.6, 182.2.

HRMS found,  $m/z$ : 316.1655  $[\text{M}+\text{H}]^+$ .  $\text{C}_{17}\text{H}_{22}\text{N}_3\text{O}_3^+$ . Calculated,  $m/z$ : 316.1656.

**(4aS\*,4'R\*)-9-methoxy-1',2'-dimethyl-2,4,4a,6-tetrahydro-1H-spiro[[1,4]oxazino[4,3-a]quinoline-5,4'-imidazol]-5'(1'H)-one (2'q):**

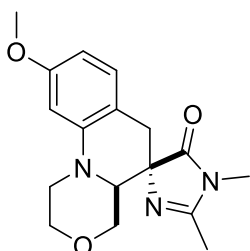

Yield 120 mg (38%), dark viscous oil.

$^1\text{H}$  NMR (700 MHz, DMSO- $d_6$ ):  $\delta$  2.16 (s, 3 H), 2.54 (d,  $J=16.4$  Hz, 1 H), 2.82 (td,  $J=12.3$ , 3.5 Hz, 1 H), 2.88 (d,  $J=16.4$  Hz, 1 H), 2.92 (s, 3 H), 3.21 (dd,  $J=10.8$ , 3.0 Hz, 1 H), 3.44 (td,  $J=11.5$ , 2.7 Hz, 1 H), 3.65 (dd,  $J=10.9$ , 2.7 Hz, 1 H), 3.71 (s, 3 H), 3.74 - 3.80 (m, 2 H), 3.84 (dd,  $J=11.6$ , 3.4 Hz, 1 H), 6.26 (dd,  $J=8.1$ , 2.4 Hz, 1 H), 6.41 (d,  $J=2.3$  Hz, 1 H), 6.80 (d,  $J=8.2$  Hz, 1 H).

$^{13}\text{C}$  NMR (176 MHz, DMSO- $d_6$ ):  $\delta$  15.1, 26.0, 33.9, 46.4, 54.9, 58.2, 65.9, 66.4, 67.1, 98.5, 103.1, 112.2, 129.4, 145.6, 158.9, 161.7, 180.2.

HRMS found,  $m/z$ : 316.1658  $[\text{M}+\text{H}]^+$ .  $\text{C}_{17}\text{H}_{22}\text{N}_3\text{O}_3^+$ . Calculated,  $m/z$ : 316.1656.

**1,1',2-trimethyl-2'-phenyl-1',4'-dihydro-2'H-spiro[imidazole-4,3'-quinolin]-5(1H)-one**  
(2r and 2'r)

**(2'R\*,3'R\*)-1,1',2-trimethyl-2'-phenyl-2',4'-dihydro-1'H-spiro[imidazole-4,3'-quinolin]-5(1H)-one (2r):**

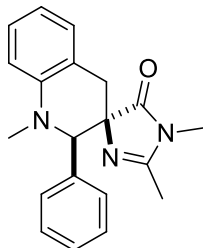

Yield 77 mg (23%), dark viscous oil.

$^1\text{H}$  NMR (700 MHz, DMSO- $d_6$ ):  $\delta$  1.84 (s, 3 H), 2.51 (d,  $J = 15.4$  Hz, 1 H), 2.62 (s, 3 H), 2.66 (s, 3 H), 3.11 (d,  $J=15.4$  Hz, 1 H), 4.47 (s, 1 H), 6.60 (t,  $J = 7.3$  Hz, 1 H), 6.75 (d,  $J = 8.2$  Hz, 1 H), 6.92 (d,  $J=7.2$  Hz, 1 H), 7.04 - 7.08 (m, 2 H), 7.09 (t,  $J = 7.7$  Hz, 1 H), 7.21–7.26 (m, 3 H).

$^{13}\text{C}$  NMR (176 MHz, DMSO- $d_6$ ):  $\delta$  14.6, 25.9, 34.6, 37.6, 67.5, 70.3, 111.9, 116.2, 120.3, 127.1, 127.2, 127.6, 128.3, 137.3, 146.1, 160.6, 182.0.

HRMS found,  $m/z$ : 334.1915  $[\text{M}+\text{H}]^+$ .  $\text{C}_{21}\text{H}_{24}\text{N}_3\text{O}^+$ . Calculated,  $m/z$ : 334.1914.

**(2'R\*,3'S\*)-1,1',2-trimethyl-2'-phenyl-2',4'-dihydro-1'H-spiro[imidazole-4,3'-quinolin]-5(1H)-one (2'r):**

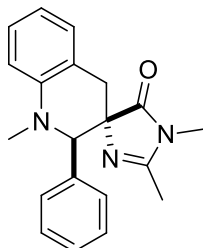

Yield 239 mg (72%), dark solid, m.p. 83–85°C.

$^1\text{H}$  NMR (700 MHz, DMSO- $d_6$ ):  $\delta$  2.08 (s, 3 H), 2.55 (d,  $J=16.0$  Hz, 1 H), 2.72 (s, 3 H), 2.85 (s, 3 H), 2.89 (d,  $J = 16.0$  Hz, 1 H), 4.14 (s, 1 H), 6.58 (t,  $J = 7.1$  Hz, 1 H), 6.65 (d,  $J = 8.2$  Hz, 1 H), 6.94 (d,  $J = 7.2$  Hz, 1 H), 6.95–6.99 (m, 2 H), 7.10 (t,  $J = 7.6$  Hz, 1 H), 7.20–7.27 (m, 3 H).

$^{13}\text{C}$  NMR (176 MHz, DMSO- $d_6$ ):  $\delta$  15.0, 26.1, 31.9, 37.5, 67.7, 68.7, 109.8, 115.3, 118.3, 127.3, 127.4, 127.9, 128.6, 138.3, 145.0, 160.6, 180.4.

HRMS found,  $m/z$ : 334.1915  $[\text{M}+\text{H}]^+$ .  $\text{C}_{21}\text{H}_{24}\text{N}_3\text{O}^+$ . Calculated,  $m/z$ : 334.1914.

**7'-methoxy-1,1',2-trimethyl-2'-phenyl-1',4'-dihydro-2'*H*-spiro[imidazole-4,3'-quinolin]-5(1*H*)-one (2s and 2's)**

**(2'*R*\*,3'*R*\*)-7'-methoxy-1,1',2-trimethyl-2'-phenyl-2',4'-dihydro-1'*H*-spiro[imidazole-4,3'-quinolin]-5(1*H*)-one (2s):**

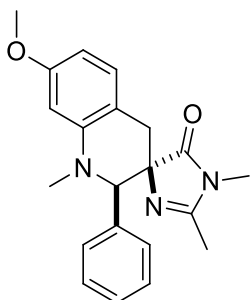

Yield 52 mg (15%), dark viscous oil.

$^1\text{H}$  NMR (700 MHz,  $\text{DMSO-}d_6$ ):  $\delta$  1.84 (s, 3 H), 2.47 (d,  $J = 15.4$  Hz, 1 H), 2.62 (s, 3 H), 2.65 (s, 3 H), 2.99 (d,  $J = 15.4$  Hz, 1 H), 3.72 (s, 3 H), 4.44 (s, 1 H), 6.20 (dd,  $J = 8.2, 2.4$  Hz, 1 H), 6.28 (d,  $J = 2.4$  Hz, 1 H), 6.81 (d,  $J = 8.2$  Hz, 1 H), 7.12–7.10 (m, 2 H), 7.22–7.26 (m, 3 H).

$^{13}\text{C}$  NMR (176 MHz,  $\text{DMSO-}d_6$ ):  $\delta$  14.6, 25.8, 33.8, 37.7, 54.8, 67.3, 70.3, 98.2, 101.3, 112.8, 127.1, 127.6, 128.3, 128.7, 137.3, 146.9, 159.1, 160.5, 182.0.

HRMS found,  $m/z$ : 350.1865  $[\text{M}+\text{H}]^+$ .  $\text{C}_{21}\text{H}_{24}\text{N}_3\text{O}_2^+$ . Calculated,  $m/z$ : 350.1863.

**(2'*R*\*,3'*S*\*)-7'-methoxy-1,1',2-trimethyl-2'-phenyl-2',4'-dihydro-1'*H*-spiro[imidazole-4,3'-quinolin]-5(1*H*)-one (2's):**

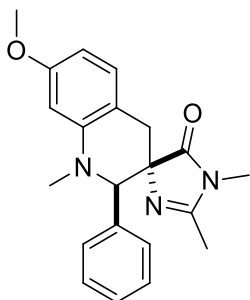

Yield 94 mg (27%), dark viscous oil.

$^1\text{H}$  NMR (700 MHz,  $\text{DMSO-}d_6$ ):  $\delta$  2.08 (s, 3 H), 2.47 (d,  $J = 16.1$  Hz, 1 H), 2.71 (s, 3 H), 2.83 (d,  $J = 16.1$  Hz, 1 H), 2.86 (s, 3 H), 3.73 (s, 3 H), 4.10 (s, 1 H), 6.16–6.20 (m, 2 H), 6.83 (d,  $J = 7.8$  Hz, 1 H), 6.94–6.99 (m, 2 H), 7.21–7.25 (m, 3 H).

$^{13}\text{C}$  NMR (176 MHz,  $\text{DMSO-}d_6$ ):  $\delta$  15.0, 26.1, 31.2, 37.6, 54.8, 67.6, 68.9, 96.3, 100.4, 111.0, 125.2, 127.3, 127.4, 127.9, 128.1, 128.8, 129.1, 138.3, 145.9, 159.2, 180.4.

HRMS found,  $m/z$ : 350.1865  $[\text{M}+\text{H}]^+$ .  $\text{C}_{21}\text{H}_{24}\text{N}_3\text{O}_2^+$ . Calculated,  $m/z$ : 350.1863.

**1,2-dimethyl-6',7',11b',13'-tetrahydrospiro[imidazole-4,12'-isoquinolino[2,1-a]quinolin]-5(1H)-one (2t and 2't)**

**(4R\*,11b'R\*)-1,2-methyl-6',7',11b',13'-tetrahydrospiro[imidazole-4,12'-isoquinolino[2,1-a]quinolin]-5(1H)-one (2t):**

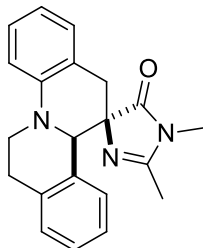

Yield 109 mg (33%), dark viscous oil.

$^1\text{H}$  NMR (700 MHz, DMSO- $d_6$ ):  $\delta$  1.80 (s, 3 H), 2.56 (d,  $J$  = 16.4 Hz, 1 H), 2.63 (dt,  $J$  = 14.6, 3.4 Hz, 1 H), 2.68 (s, 3 H), 3.10 (ddd,  $J$  = 14.6, 11.6, 4.9 Hz, 1 H), 3.21 (td,  $J$  = 11.6, 3.0 Hz, 1 H), 3.34 (d,  $J$  = 16.4 Hz, 1 H), 3.90 (ddd,  $J$  = 11.7, 4.9, 3.8 Hz, 1 H), 4.59 (s, 1 H), 6.65 (t,  $J$  = 7.3 Hz, 1 H), 6.82 (d,  $J$  = 8.2 Hz, 1 H), 6.99 (d,  $J$  = 7.5 Hz, 1 H), 7.02 (d,  $J$  = 7.5 Hz, 1 H), 7.07–7.12 (m, 2 H), 7.14 (d,  $J$  = 7.1 Hz, 1 H), 7.17 (td,  $J$  = 7.4, 1.2 Hz, 1 H).

$^{13}\text{C}$  NMR (176 MHz, DMSO- $d_6$ ):  $\delta$  14.5, 25.9, 29.4, 35.9, 45.3, 60.9, 72.0, 113.7, 116.5, 120.0, 125.0, 126.7, 126.9, 127.0, 127.4, 128.8, 132.3, 137.4, 145.8, 160.5, 183.3.

HRMS found,  $m/z$ : 332.1757  $[\text{M}+\text{H}]^+$ .  $\text{C}_{21}\text{H}_{22}\text{N}_3\text{O}^+$ . Calculated,  $m/z$ : 332.1757.

## 5. Procedure for the gram scale synthesis

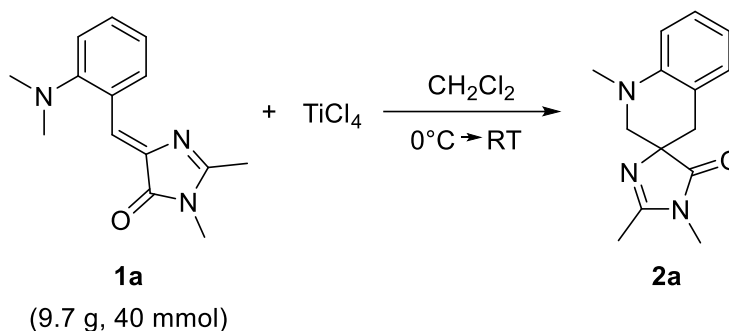

Compound **1a** (9.7 g, 40 mmol) was dissolved in dry  $\text{CH}_2\text{Cl}_2$  (500 mL) in argon and cooled to  $0^\circ\text{C}$ . Solution of  $\text{TiCl}_4$  (11.4 g, 60 mmol) in 40 mL of dry  $\text{CH}_2\text{Cl}_2$  was added dropwise for 10 min, the resulted mixture was stirred at the same temperature for 30 min and then was warmed to RT. Stirring was continued for 3 h and then 5% aqueous solution of  $\text{NaHCO}_3$  (500 mL) was carefully added, the resulted mixture was filtered and the resulted clear solution extracted with EtOAc ( $3 \times 800$  mL). Combined organic layers were washed with brine ( $3 \times 300$  mL), dried over anhydrous  $\text{Na}_2\text{SO}_4$ . All volatiles were removed in vacuo and the residue was purified with column chromatography (eluent – mixture of hexane and EtOAc, v/v 1:3).

**2a**. Yield 9.0 g (93%).



## 6. Proof of the reaction reversibility

Compound **2** or **2'** (0.5 mmol) was dissolved in dry CH<sub>2</sub>Cl<sub>2</sub> (10 mL) in argon and cooled to 0°C. Solution of TiCl<sub>4</sub> (142 mg, 0.75 mmol) in 2 mL of dry CH<sub>2</sub>Cl<sub>2</sub> was added dropwise, the resulted mixture was stirred at the same temperature for 30 min and then was warmed to RT. Stirring was continued overnight. 3% aqueous solution of NaHCO<sub>3</sub> (30 mL) was carefully added and the resulted mixture was extracted with EtOAc (3×30 mL). Combined organic layers were washed with brine (3×30 mL), dried over anhydrous Na<sub>2</sub>SO<sub>4</sub>. All volatiles were removed in vacuo and the residue was purified with column chromatography (eluent – mixture of hexane and EtOAc, v/v 1:3).

### Reaction of **2j**.

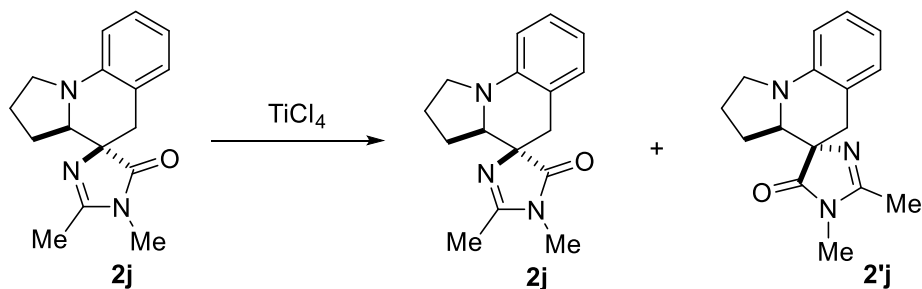

**2j**: yield 77 mg (57%).

**2'j**: yield 17 mg (13%).

### Reaction of **2l**.

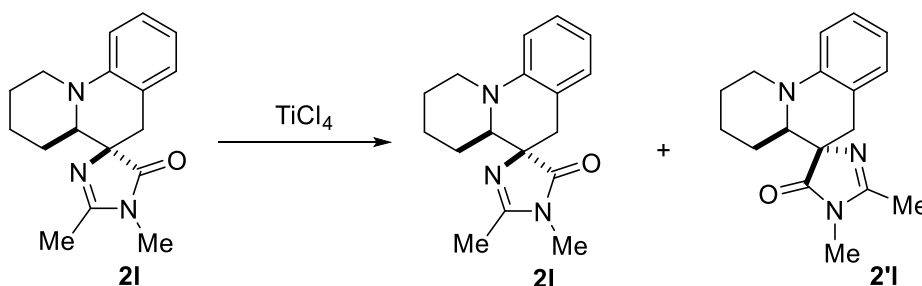

**2l**: yield 25 mg (18%).

**2'l**: yield 75 mg (54%).

### Reaction of **2'l**

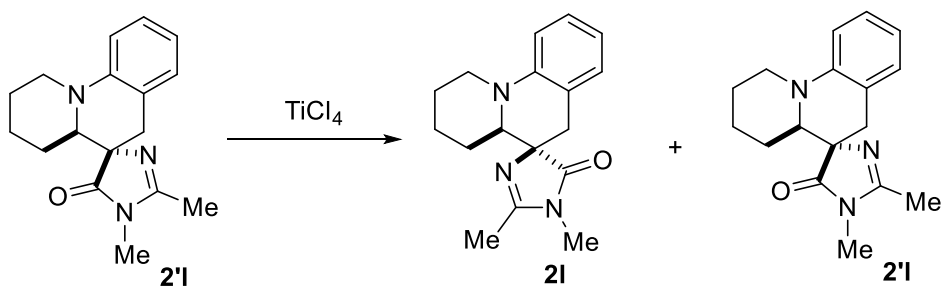

**2l**: yield 28 mg (19%).

**2'l**: yield 72 mg (51%).

## 7. Hydrolysis procedure

### General method for synthesis of 3a, 3e and 3'm

Compound **2** or **2'** (0.5 mmol) was dissolved in the mixture of MeOH (5 mL) and H<sub>2</sub>O (15 mL). 80 mg (2 mmol) of NaOH was added and the resulted mixture was refluxed for 2 h. The mixture was cooled, EtOAc was added (200 ml) and the resulted solution was washed with brine (3 × 30 ml). Separated organic layer was dried over anhydrous Na<sub>2</sub>SO<sub>4</sub>. All volatiles were removed in vacuo and the residue was purified with column chromatography (eluent – mixture of CHCl<sub>3</sub> and EtOH, v/v 25:1).

### 3-acetamido-N,1-dimethyl-1,2,3,4-tetrahydroquinoline-3-carboxamide (3a)

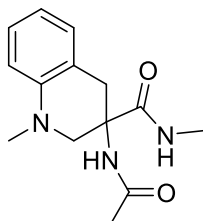

Yield 79 mg (60%), dark viscous oil.

<sup>1</sup>H NMR (700 MHz, DMSO-*d*<sub>6</sub>): δ 1.76 (s, 3 H), 2.58 (d, *J*=4.6 Hz, 3 H), 2.83 (s, 3 H), 2.97 (dd, *J*=16.2, 2.1 Hz, 1 H), 3.10 (d, *J*=16.4 Hz, 1 H), 3.28 (m, 1 H), 3.48 (dd, *J*=11.6, 2.5 Hz, 1 H), 6.56 (t, *J*=7.2 Hz, 1 H), 6.60 (d, *J*=8.2 Hz, 1 H), 6.89 (d, *J*=7.2 Hz, 1 H), 7.01 (t, *J*=8.1 Hz, 1 H), 7.63 (d, *J*=4.2 Hz, 1 H), 7.67 (s, 1 H).

<sup>13</sup>C NMR (176 MHz, DMSO-*d*<sub>6</sub>): δ 23.1, 26.1, 34.7, 38.6, 54.7, 55.6, 110.7, 116.1, 119.7, 126.8, 129.3, 144.9, 169.6, 172.3.

HRMS found, *m/z*: 262.1548 [M+H]<sup>+</sup>. C<sub>14</sub>H<sub>20</sub>N<sub>3</sub>O<sub>2</sub><sup>+</sup>. Calculated, *m/z*: 262.1550.

### N,1-dimethyl-3-propionamido-1,2,3,4-tetrahydroquinoline-3-carboxamide (3e)

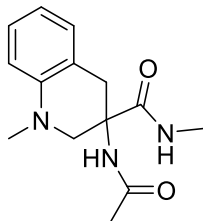

Yield 66 mg (49%), dark viscous oil.

<sup>1</sup>H NMR (700 MHz, DMSO-*d*<sub>6</sub>): δ 0.85 (t, *J*=7.6 Hz, 3 H), 1.98 - 2.08 (m, 2 H), 2.58 (d, *J*=4.6 Hz, 3 H), 2.82 (s, 3 H), 2.97 (dd, *J*=16.5, 1.8 Hz, 1 H), 3.09 (d, *J*=16.2 Hz, 1 H), 3.31 (m, 1 H), 3.50 (dd, *J*=11.6, 2.5 Hz, 1 H), 6.53 - 6.57 (m, 1 H), 6.59 (d, *J*=8.0 Hz, 1 H), 6.89 (d, *J*=7.4 Hz, 1 H), 7.01 (t, *J*=7.5 Hz, 1 H), 7.52 (s, 1 H), 7.61 (d, *J*=4.2 Hz, 1 H).

<sup>13</sup>C NMR (176 MHz, DMSO-*d*<sub>6</sub>): δ 9.6, 26.1, 28.5, 34.8, 38.5, 54.6, 55.5, 110.5, 116.0, 119.7, 126.8, 129.3, 144.8, 172.4, 173.4.

HRMS found, *m/z*: 276.1707 [M+H]<sup>+</sup>. C<sub>15</sub>H<sub>22</sub>N<sub>3</sub>O<sub>2</sub><sup>+</sup>. Calculated, *m/z*: 276.1707.

**(4aR\*,5S\*)-9-methoxy-N-methyl-5-propionamido-2,3,4,4a,5,6-hexahydro-1H-pyrido[1,2-a]quinoline-5-carboxamide (3'n)**

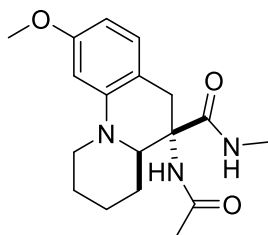

Yield 95 mg (58%), dark viscous oil.

$^1\text{H}$  NMR (700 MHz,  $\text{DMSO-}d_6$ ):  $\delta$  1.05 - 1.11 (m, 1 H), 1.17 - 1.21 (m, 1 H), 1.36 - 1.42 (m, 2 H), 1.47 - 1.54 (m, 1 H), 1.71 (s, 3 H), 1.75 - 1.78 (m, 1 H), 2.57 (d,  $J=4.6$  Hz, 3 H), 2.86 - 2.92 (m, 1 H), 3.04 - 3.08 (m, 1 H), 3.08 - 3.12 (m, 1 H), 3.23 (d,  $J=11.8$  Hz, 1 H), 3.68 (s, 3 H), 4.09 (d,  $J=15.3$  Hz, 1 H), 6.18 (dd,  $J=8.2, 2.3$  Hz, 1 H), 6.36 (d,  $J=2.3$  Hz, 1 H), 6.79 (d,  $J=8.2$  Hz, 1 H), 7.37 (s, 1 H), 7.64 (d,  $J=4.6$  Hz, 1 H).

$^{13}\text{C}$  NMR (176 MHz,  $\text{DMSO-}d_6$ ):  $\delta$  21.9, 23.0, 24.7, 24.9, 26.2, 27.6, 48.3, 54.8, 58.5, 61.4, 98.4, 101.9, 113.2, 130.5, 143.1, 158.9, 168.9, 171.2.

HRMS found,  $m/z$ : 332.1972  $[\text{M}+\text{H}]^+$ .  $\text{C}_{18}\text{H}_{26}\text{N}_3\text{O}_3^+$ . Calculated,  $m/z$ : 332.1969.

## 8. Crystal Data

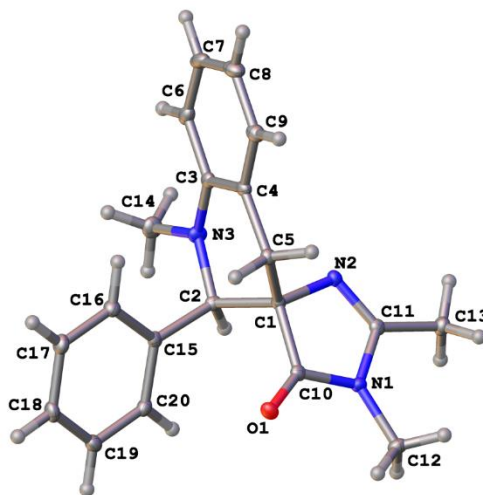

**Fig. S1.** General view of the compound **2'r** in representation of atoms *via* thermal ellipsoids at 50% probability level; the solvent acetonitrile molecule is not shown.

**Crystallographic data:** Crystals of **2'r** ( $C_{22}H_{24}N_4O$ ,  $M = 360.45$ ) are triclinic, space group P-1, at 120 K:  $a = 6.9795(8)$ ,  $b = 9.9569(11)$ ,  $c = 14.5673(17)\text{\AA}$ ,  $\alpha = 108.531(2)$ ,  $\beta = 92.161(3)^\circ$ ,  $\gamma = 97.846(3)$ ,  $V = 947.32(19)\text{\AA}^3$ ,  $Z = 2$  ( $Z' = 0.5$ ),  $d_{\text{calc}} = 1.264\text{ g cm}^{-3}$ ,  $\mu(\text{MoK}\alpha) = 0.080\text{ cm}^{-1}$ ,  $F(000) = 384$ . Intensities of 10970 reflections were measured for **2'r**, respectively, with a Bruker APEX2 DUO CCD diffractometer [ $\lambda(\text{MoK}\alpha) = 0.71073\text{ \AA}$ ,  $\omega$ -scans,  $2\theta < 60^\circ$ ]; 4568 independent reflections [ $R_{\text{int}} = 0.0565$ ] were used in further refinement. Using Olex2,<sup>7</sup> the structure was solved with the ShelXT<sup>8</sup> structure solution program using Intrinsic Phasing and refined with the olex2.refine<sup>9</sup> refinement package using Gauss-Newton minimisation. Positions of hydrogen atoms were calculated, and they were refined in the isotropic approximation within the riding model. The refinement converged to  $wR2 = 0.1227$  and  $GOF = 0.995$  for all the independent reflections ( $R1 = 0.0523$  was calculated against  $F$  for 2838 observed reflections with  $I > 2\sigma(I)$ ). CCDC 2026499 contains the supplementary crystallographic information for **2'r**.

## 9. Configuration determination by NMR

### Methods

All NMR spectra were recorded using the Bruker Avance 700 MHz spectrometer. Heteronuclear  $J$ -coupling were measured using the PIP-HSQCMBBC pulse sequences.<sup>10</sup> Two spectra (in-phase and anti-phase variants of HSQCMBBC were acquired in the interleaved manner),  $J$ -couplings were determined as a distance between the cross-peak positions in the sum and difference of two spectra. NOESY was recorded with the mixing time of 300 ms. Ratio between the integrals of cross- and diagonal peaks was taken as the NOE value. Conformations of **2** and **2'** were generated using the Avogadro 1.2.0 software, applying the energy minimization in MMFF94s force field.<sup>11</sup>

### Results

The stereoisomery of **2r** and **2'r** was studied using NMR conformational analysis. We measured directly all  $^3J_{\text{HN}}$ ,  $^3J_{\text{HC}}$  and NOE connectivities, which allowed the straightforward interpretation. Due to the presence of adjacent aromatic ring, there are only two possible half-chair conformations of piperidine ring (Figure S2),<sup>12</sup> thus one needs to consider four options to determine the relative configuration. In both compounds the upfield shifted proton of 5-CH<sub>2</sub> group in the piperidine cycle is equatorial. This follows from the large  $^3J_{\text{H5/C13}}$  coupling (5.8 Hz), as well as the intense NOE to the C7 proton (Figure S2, Tables). In turn, the second axial 5-CH<sub>2</sub> proton is in *trans*- conformation with respect to the nitrogen-3 of the imidazolone ring ( $^3J_{\text{HN}}=3.6$  Hz), this observation allows excluding two out of four conformations. In **2r** we observe a strong NOE between the C13 proton and axial C5 proton, which implies that phenyl ring and nitrogen are on the same side of piperidine cycle, and configuration of the compound is *4,13-cis*. This is supported by a weak NOE between the  $\epsilon/\delta$  protons of phenyl ring and 3-methyl group of imidazolone. In **2'r** we found a weak NOE between the C13 proton and equatorial C5 proton, as well as a strong peak between the  $\delta$  protons of phenyl ring and axial proton of 5-CH<sub>2</sub> group. Thus, phenyl ring and nitrogen are on the opposite sides of piperidine cycle, and configuration of the compound is *4,13-trans*.

Stereoisomery of **2l** and **2'l** was investigated analogously, analyzing four possible structures of the piperidine ring, which is adjacent to the phenyl group: two half-chair conformations of two stereoisomers (Figure S3). Like in compound **2l**, the downfield shifted proton of 5-CH<sub>2</sub> group of **2l** is axial ( $^3J_{\text{H5a/C13}}=2.0$  Hz) and is in *trans*-conformation to the nitrogen-3 of the imidazolone ring ( $^3J_{\text{HN}}=3.6$  Hz). The C13 proton of **2l** is as well axial ( $^3J_{\text{H13/C5}}=2.2$  Hz). This leaves us with single possible configuration, when the C5 and C13 axial protons are on the same side of the piperidine ring and are in *trans*-position to the nitrogene of imidazolone. This conformation is supported by the absence of NOE peak between the C5 protons and C14 protons of the second piperidine, and a NOE peak between the axial C5 and C13 protons. In **2'l** the C13 proton becomes equatorial ( $^3J_{\text{H13/C5}}=4.1$  Hz), while the axial C5 proton is still in *trans*-position to the nitrogen-3 of imidazolone ( $^3J_{\text{HN}}=2.7$  Hz). This leaves us with the second configuration shown in Fig. S1. This configuration is as well supported by the NOESY data.

**Table S1:** Key NMR data obtained for the 4,13-*cis*-isomer – **2r**.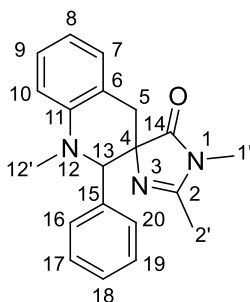

| Position | $\delta(^1\text{H})$ , ppm<br>(mult) <sup>a</sup> | $\delta(^{13}\text{C}/^{15}\text{N})$<br>ppm | $^3J_{\text{HN}}$<br>Hz <sup>b</sup> | $^3J_{\text{HC}}$ , Hz                      | NOE <sup>c</sup> |
|----------|---------------------------------------------------|----------------------------------------------|--------------------------------------|---------------------------------------------|------------------|
| 1N       |                                                   | 150                                          |                                      |                                             |                  |
| 1'       | 2.63 (s)                                          | 26.4                                         |                                      |                                             |                  |
| 2        |                                                   | 161.1                                        |                                      |                                             |                  |
| 2'       | 1.85 (s)                                          | 15.1                                         |                                      |                                             | 16(5)            |
| 3N       |                                                   | 253                                          |                                      |                                             |                  |
| 4        |                                                   | 70.8                                         |                                      |                                             |                  |
| 5ax      | 3.12<br>(d,16Hz)                                  | 35.1                                         | 3(3.6)                               | 13(3.2);11(2.9);7(3.2);14(2.8)              | 7(60);13(141)    |
| 5eq      | 2.51<br>(d,16Hz)                                  | 35.1                                         |                                      | 13(5.8);11(4.2);7(4.5);14(2.7)              | 7(207)           |
| 6        |                                                   | 120.8                                        |                                      |                                             |                  |
| 7        | 6.92 (d,8Hz)                                      | 128.9                                        |                                      |                                             |                  |
| 8        | 6.61 (t,8Hz)                                      | 116.7                                        |                                      |                                             |                  |
| 9        | 7.11 (t,8Hz)                                      | 127.7                                        |                                      |                                             |                  |
| 10       | 6.76 (d,8Hz)                                      | 112.4                                        |                                      |                                             |                  |
| 11       |                                                   | 146.6                                        |                                      |                                             |                  |
| 12N      |                                                   | 60                                           |                                      |                                             |                  |
| 12'      | 2.66 (s)                                          | 38.2                                         |                                      |                                             |                  |
| 13       | 4.48 (s)                                          | 68.0                                         | 3(2.4)                               | 16<br>(4.2);12'(1.9);11(1.6);5(2.3);14(2.0) | 5ax(141)         |
| 14       |                                                   | 182.6                                        |                                      |                                             |                  |
| 15       |                                                   | 137.5                                        |                                      |                                             |                  |
| 16/20    | 7.07 (d,8Hz)                                      | 128.9                                        |                                      |                                             | 2'(5)            |
| 17/19    | 7.24 (na)                                         | 128.1                                        |                                      |                                             |                  |
| 18       | 7.25(na)                                          | 127.6                                        |                                      |                                             |                  |

<sup>a</sup>signal multiplicities are denoted as **s** - singleton, **d** - doubleton, **t** - tripleton.

<sup>b</sup>Only the key vicinal *J*-couplings that are significant for the conformation analysis are provided. Number denotes the position of heteroatom, *J*-coupling in Hz is provided in parentheses.

<sup>c</sup>first number is the position of proton, relative intensity is given in parentheses. 150-160 r.u. corresponds to 2.5 angstroms.

**Table S2:** key NMR data obtained for the 4,13-*trans*-isomer – **2'r**.

| Position | $\delta(^1\text{H})$ , ppm<br>(mult) <sup>a</sup> | $\delta(^{13}\text{C}/^{15}\text{N})$<br>ppm | $^3J_{\text{HN}}$<br>Hz <sup>b</sup> | $^3J_{\text{HC}}$ , Hz                                 | NOE <sup>c</sup> |
|----------|---------------------------------------------------|----------------------------------------------|--------------------------------------|--------------------------------------------------------|------------------|
| 1N       |                                                   | 150                                          |                                      |                                                        |                  |
| 1'       | 2.86 (s)                                          | 26.7                                         |                                      |                                                        |                  |
| 2        |                                                   | 161.2                                        |                                      |                                                        |                  |
| 2'       | 2.09 (s)                                          | 15.6                                         |                                      |                                                        |                  |
| 3N       |                                                   | 258                                          |                                      |                                                        |                  |
| 4        |                                                   | 69.3                                         |                                      |                                                        |                  |
| 5ax      | 2.91 (d,16Hz)                                     | 32.5                                         | 3(3.5)                               | 13(2.7);11(2.9);7(3.0);14(2.5)                         | 7(97), 16(70)    |
| 5eq      | 2.56 (d,16Hz)                                     | 32.5                                         | 3(1)                                 | 13(4.6);11(3.9);7(4.2);14(3.2)                         | 7(170),13(30)    |
| 6        |                                                   | 118.8                                        |                                      |                                                        |                  |
| 7        | 6.95 (d,8Hz)                                      | 129.1                                        |                                      |                                                        |                  |
| 8        | 6.59 (t,8Hz)                                      | 115.9                                        |                                      |                                                        |                  |
| 9        | 7.11 (t,8Hz)                                      | 127.79                                       |                                      |                                                        |                  |
| 10       | 6.67 (d,8Hz)                                      | 110.3                                        |                                      |                                                        |                  |
| 11       |                                                   | 145.6                                        |                                      |                                                        |                  |
| 12N      |                                                   | 60                                           |                                      |                                                        |                  |
| 12'      | 2.74 (s)                                          | 38.0                                         |                                      |                                                        |                  |
| 13       | 4.15 (s)                                          | 68.2                                         | 3(0.6)                               | <sup>16</sup><br>(4.6);12'(2.6);11(2.9);5(3.6);14(2.7) | 5eq(30)          |
| 14       |                                                   | 180.9                                        |                                      |                                                        |                  |
| 15       |                                                   | 138.9                                        |                                      |                                                        |                  |
| 16/20    | 6.98(d,8Hz)                                       | 128.6                                        |                                      |                                                        | 5ax(70)          |
| 17/19    | 7.24 (na)                                         | 127.9                                        |                                      |                                                        |                  |
| 18       | 7.24(na)                                          | 127.9                                        |                                      |                                                        |                  |

<sup>a</sup>signal multiplicities are denoted as **s** - singleton, **d** - doubleton, **t** - triplet.

<sup>b</sup>Only the key vicinal *J*-couplings that are significant for the conformation analysis are provided. Number denotes the position of heteroatom, *J*-coupling in Hz is provided in parentheses. cfirst number is the position of proton, relative intensity is given in parentheses. 150-160 r.u. corresponds to 2.5 angstroms.

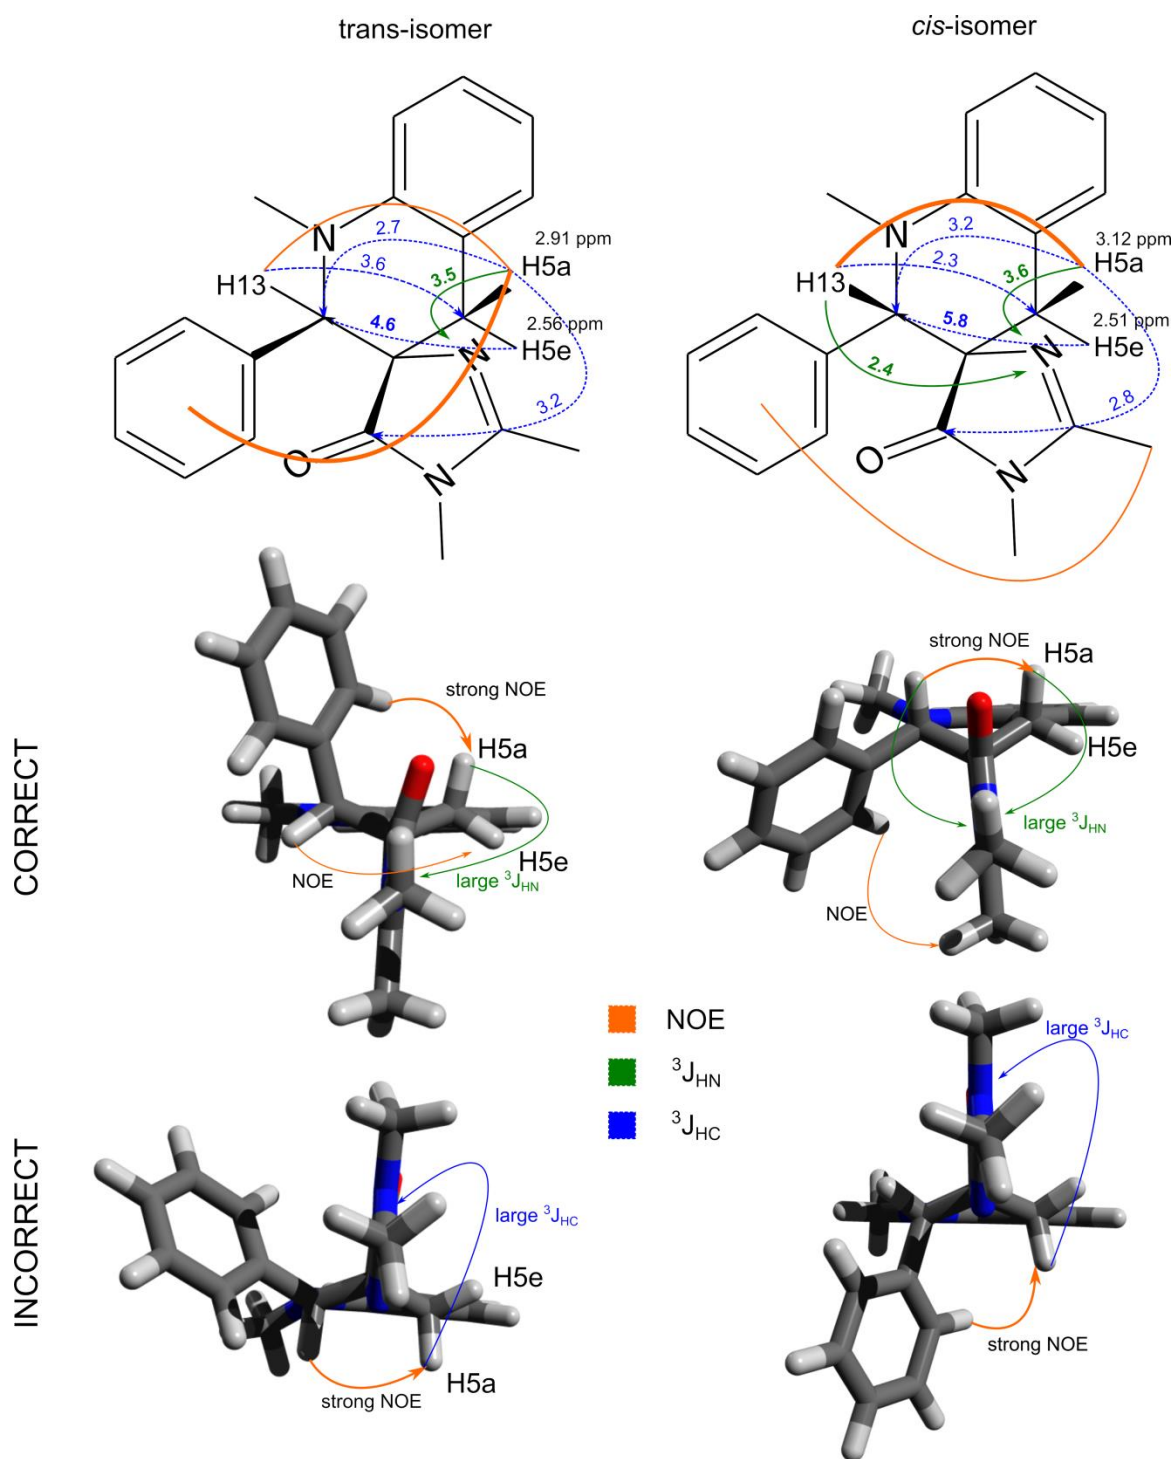

**Fig. S2:** Conformational analysis of **2r** isomers. on top - key NMR data ( $^3J_{\text{HN}}$ ,  $^3J_{\text{HC}}$  and NOE contacts) are plotted on the structure of **2r**. Below, four possible conformations of **2r** isomers are shown, with predicted NMR parameters.



**Table S3:** Key NMR data obtained for the 4,13-*cis*-isomer – **2l**.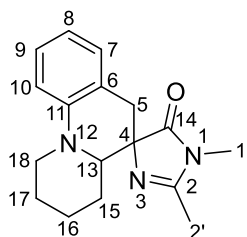

| Position | $\delta(^1\text{H})$ , ppm<br>(mult) <sup>a</sup> | $\delta(^{13}\text{C}/^{15}\text{N})$<br>ppm | $^3J_{\text{HN}}$<br>Hz <sup>b</sup> | $^3J_{\text{HC}}$ , Hz |
|----------|---------------------------------------------------|----------------------------------------------|--------------------------------------|------------------------|
| 1N       |                                                   | 151                                          |                                      |                        |
| 1'       | 2.67 (s)                                          | 26.7                                         |                                      |                        |
| 2        |                                                   | 161.5                                        |                                      |                        |
| 2'       | 2.17 (s)                                          | 15.5                                         |                                      |                        |
| 3N       |                                                   | 254                                          |                                      |                        |
| 4        |                                                   | 70.8                                         |                                      |                        |
| 5ax      | 3.04<br>(d,16Hz)                                  | 36.9                                         | 3(3.7)                               | 13(2.0);14(2.6)        |
| 5eq      | 2.34<br>(d,16Hz)                                  | 36.9                                         | 3(1.3)                               | 13(5.8); 14(2.0)       |
| 6        |                                                   | 121.3                                        |                                      |                        |
| 7        | 6.86 (d,8Hz)                                      | 129.4                                        |                                      |                        |
| 8        | 6.57 (t,8Hz)                                      | 117.2                                        |                                      |                        |
| 9        | 7.03 (t,8Hz)                                      | 127.4                                        |                                      |                        |
| 10       | 6.88 (d,8Hz)                                      | 113.6                                        |                                      |                        |
| 11       |                                                   | 145.9                                        |                                      |                        |
| 12N      |                                                   | 75                                           |                                      |                        |
| 13ax     | 3.08 (na)                                         | 60.1                                         | 3(2.0)                               | 5(2.2);14(1.6)         |
| 14       |                                                   | 183.4                                        |                                      |                        |
| 15ax     | 1.01 (na)                                         | 26.2                                         |                                      |                        |
| 15eq     | 1.19 (na)                                         | 26.2                                         |                                      |                        |
| 16       | 1.30 (na)<br>1.69 (na)                            | 23.6                                         |                                      |                        |
| 17       | 1.43 (na)<br>1.69 (na)                            | 25.7                                         |                                      |                        |
| 18       | 2.66(na)<br>4.03 (na)                             | 48.5                                         |                                      |                        |

<sup>a</sup>signal multiplicities are denoted as **s** - singleton, **d** - doubleton, **t** - tripleton.

<sup>b</sup>Only the key vicinal *J*-couplings that are significant for the conformation analysis are provided. Number denotes the position of heteroatom, *J*-coupling in Hz is provided in parentheses.

<sup>c</sup>first number is the position of proton, relative intensity is given in parentheses. 150-160 r.u. corresponds to 2.5 angstroms.

**Table S4:** key NMR data obtained for the 4,13-*trans*-isomer – **2'1**.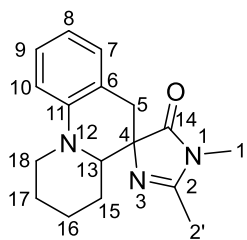

| Position | $\delta(^1\text{H})$ , ppm<br>(mult) <sup>a</sup> | $\delta(^{13}\text{C}/^{15}\text{N})$<br>ppm | $^3J_{\text{HN}}$<br>Hz <sup>b</sup> | $^3J_{\text{HC}}$ , Hz |
|----------|---------------------------------------------------|----------------------------------------------|--------------------------------------|------------------------|
| 1N       |                                                   | 150                                          |                                      |                        |
| 1'       | 2.96 (s)                                          | 26.6                                         |                                      |                        |
| 2        |                                                   | 161.2                                        |                                      |                        |
| 2'       | 2.09 (s)                                          | 15.6                                         |                                      |                        |
| 3N       |                                                   | 259                                          |                                      |                        |
| 4        |                                                   | 69.5                                         |                                      |                        |
| 5ax      | 2.81 (d,16Hz)                                     | 33.9                                         | 3(2.7)                               | 13(3.4); 14(2.7)       |
| 5eq      | 2.63 (d,16Hz)                                     | 33.9                                         | 3(1.0)                               | 13(4.0); 14(4.1)       |
| 6        |                                                   | 120.1                                        |                                      |                        |
| 7        | 6.88 (d,8Hz)                                      | 129.7                                        |                                      |                        |
| 8        | 6.55 (t,8Hz)                                      | 116.9                                        |                                      |                        |
| 9        | 7.03 (t,8Hz)                                      | 127.7                                        |                                      |                        |
| 10       | 6.85 (d,8Hz)                                      | 112.6                                        |                                      |                        |
| 11       |                                                   | 145.0                                        |                                      |                        |
| 12N      |                                                   | 75                                           |                                      |                        |
| 13       | 2.98 (na)                                         | 60.9                                         |                                      | 5(3.6);14(4.2)         |
| 14       |                                                   | 181.7                                        |                                      |                        |
| 15ax     | 1.08 (na)                                         | 25.8                                         |                                      |                        |
| 15eq     | 1.76 (na)                                         | 25.8                                         |                                      |                        |
| 16ax     | 1.41(na)                                          | 24.7                                         |                                      |                        |
| 16eq     | 1.76 (na)                                         | 24.7                                         |                                      |                        |
| 17ax     | 1.42 (na)                                         | 24.3                                         |                                      |                        |
| 17eq     | 1.55 (na)                                         | 24.3                                         |                                      |                        |
| 18ax     | 2.73 (na)                                         | 48.4                                         |                                      |                        |
| 18eq     | 4.06 (na)                                         | 48.4                                         |                                      |                        |

<sup>a</sup>signal multiplicities are denoted as **s** - singleton, **d** - doubleton, **t** - tripleton.

<sup>b</sup>Only the key vicinal *J*-couplings that are significant for the conformation analysis are provided. Number denotes the position of heteroatom, *J*-coupling in Hz is provided in parentheses. cfirst number is the position of proton, relative intensity is given in parentheses. 150-160 r.u. corresponds to 2.5 angstroms.

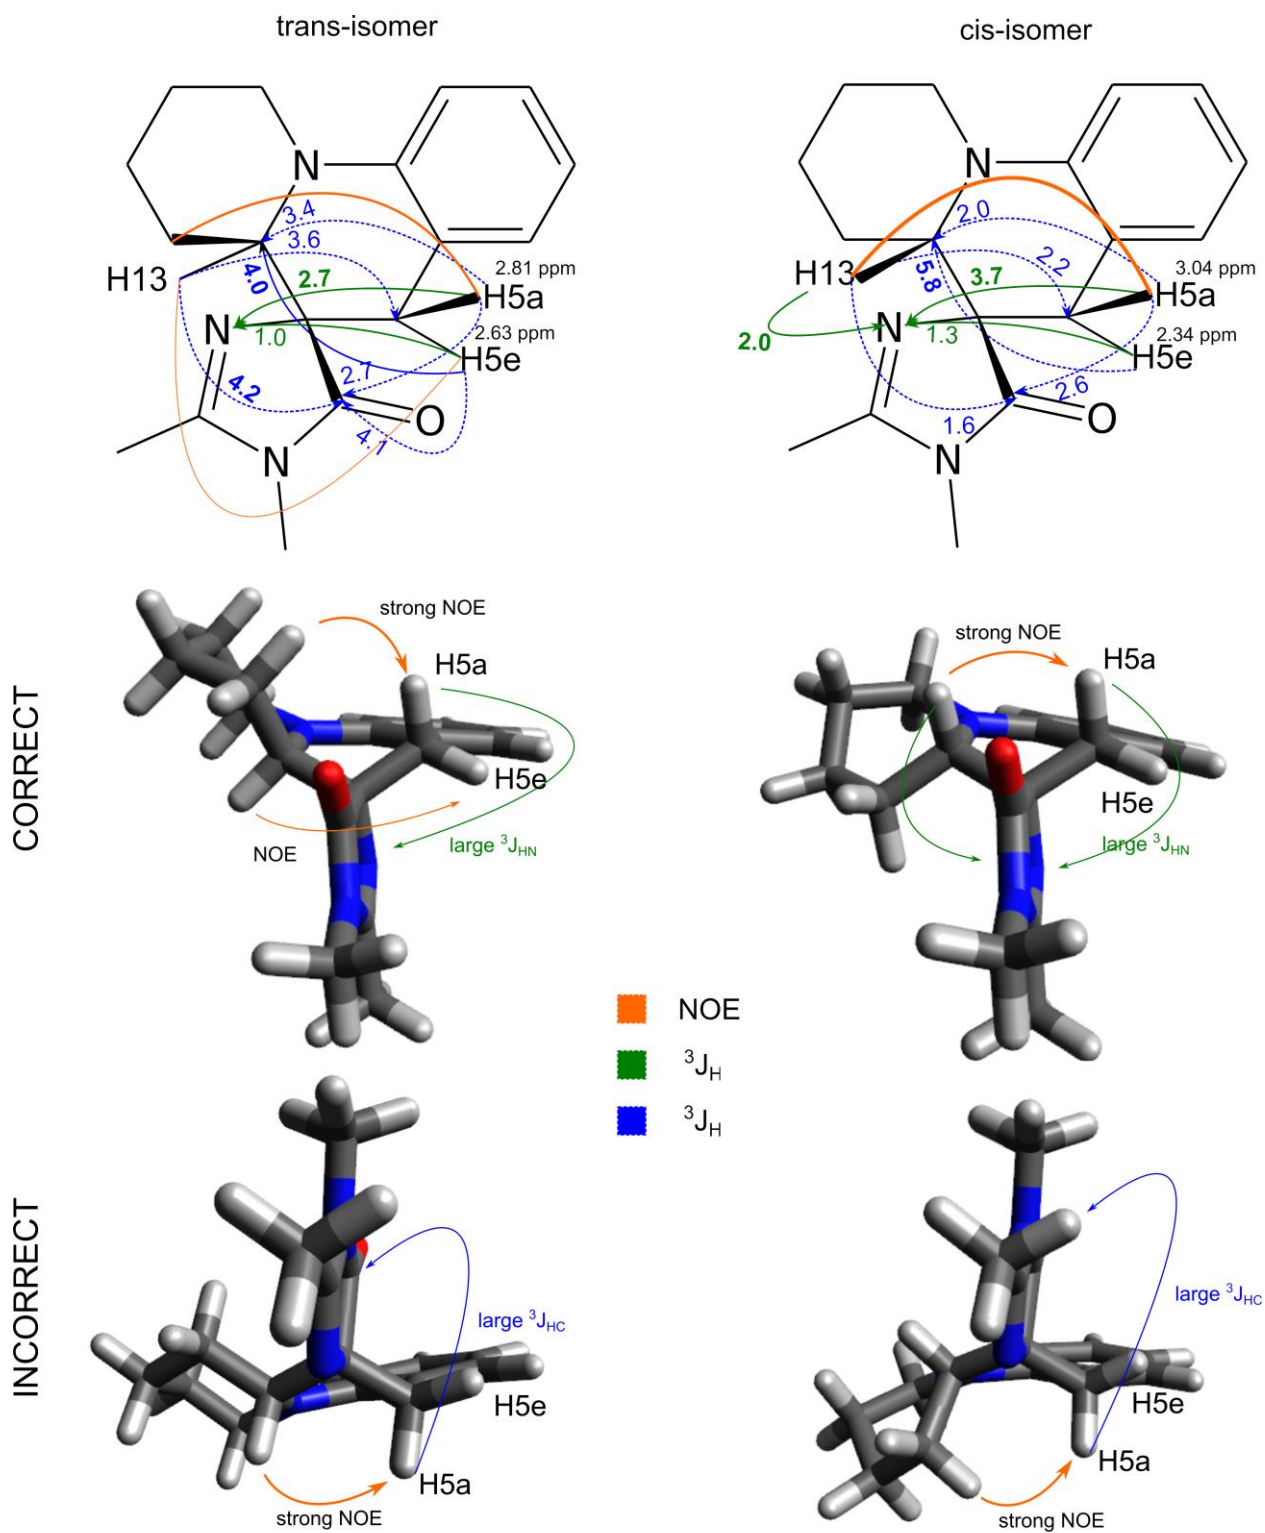

## 10. References.

- 1 E. B. Kang, P. T. M. Phuong, G. Lee, S. Lee, I. In and S. Y. Park, *Macromol. Res.*, 2019, **27**, 720–728.
- 2 L. Josa-Culleré, M. G. Hirst, J. P. Lockett, A. L. Thompson and M. G. Moloney, *J. Org. Chem.*, 2019, **84**, 9671–9683.
- 3 I. D. Jurberg, B. Peng, E. Wöstefeld, M. Wasserloos and N. Maulide, *Angew. Chemie Int. Ed.*, 2012, **51**, 1950–1953.
- 4 P. Yang, W. Xu, R. Wang, M. Zhang, C. Xie, X. Zeng and M. Wang, *Org. Lett.*, 2019, **21**, 3658–3662.
- 5 X. Cong, F. Fan, P. Ma, M. Luo, H. Chen and X. Zeng, *J. Am. Chem. Soc.*, 2017, **139**, 15182–15190.
- 6 S. J. Mahoney and E. Fillion, *Chem. – A Eur. J.*, 2012, **18**, 68–71.
- 7 O. V Dolomanov, L. J. Bourhis, R. J. Gildea, J. A. K. Howard and H. Puschmann, *J. Appl. Crystallogr.*, 2009, **42**, 339–341.
- 8 G. M. Sheldrick, *Acta Crystallogr. Sect. A*, 2015, **71**, 3–8.
- 9 L. J. Bourhis, O. V Dolomanov, R. J. Gildea, J. A. K. Howard and H. Puschmann, *Acta Crystallogr. Sect. A*, 2015, **71**, 59–75.
- 10 L. Castañar, J. Saurí, R. T. Williamson, A. Virgili and T. Parella, *Angew. Chemie Int. Ed.*, 2014, **53**, 8379–8382.
- 11 M. D. Hanwell, D. E. Curtis, D. C. Lonie, T. Vandermeersch, E. Zurek and G. R. Hutchison, *J. Cheminform.*, 2012, **4**, 17.
- 12 K. Luková, R. Nesvadba, T. Uhlíková, D. A. Obenchain, D. Wachsmuth, J.-U. Grabow and Š. Urban, *Phys. Chem. Chem. Phys.*, 2018, **20**, 14664–14670.

# 11. Copies of $^1\text{H}$ and $^{13}\text{C}$ NMR spectra

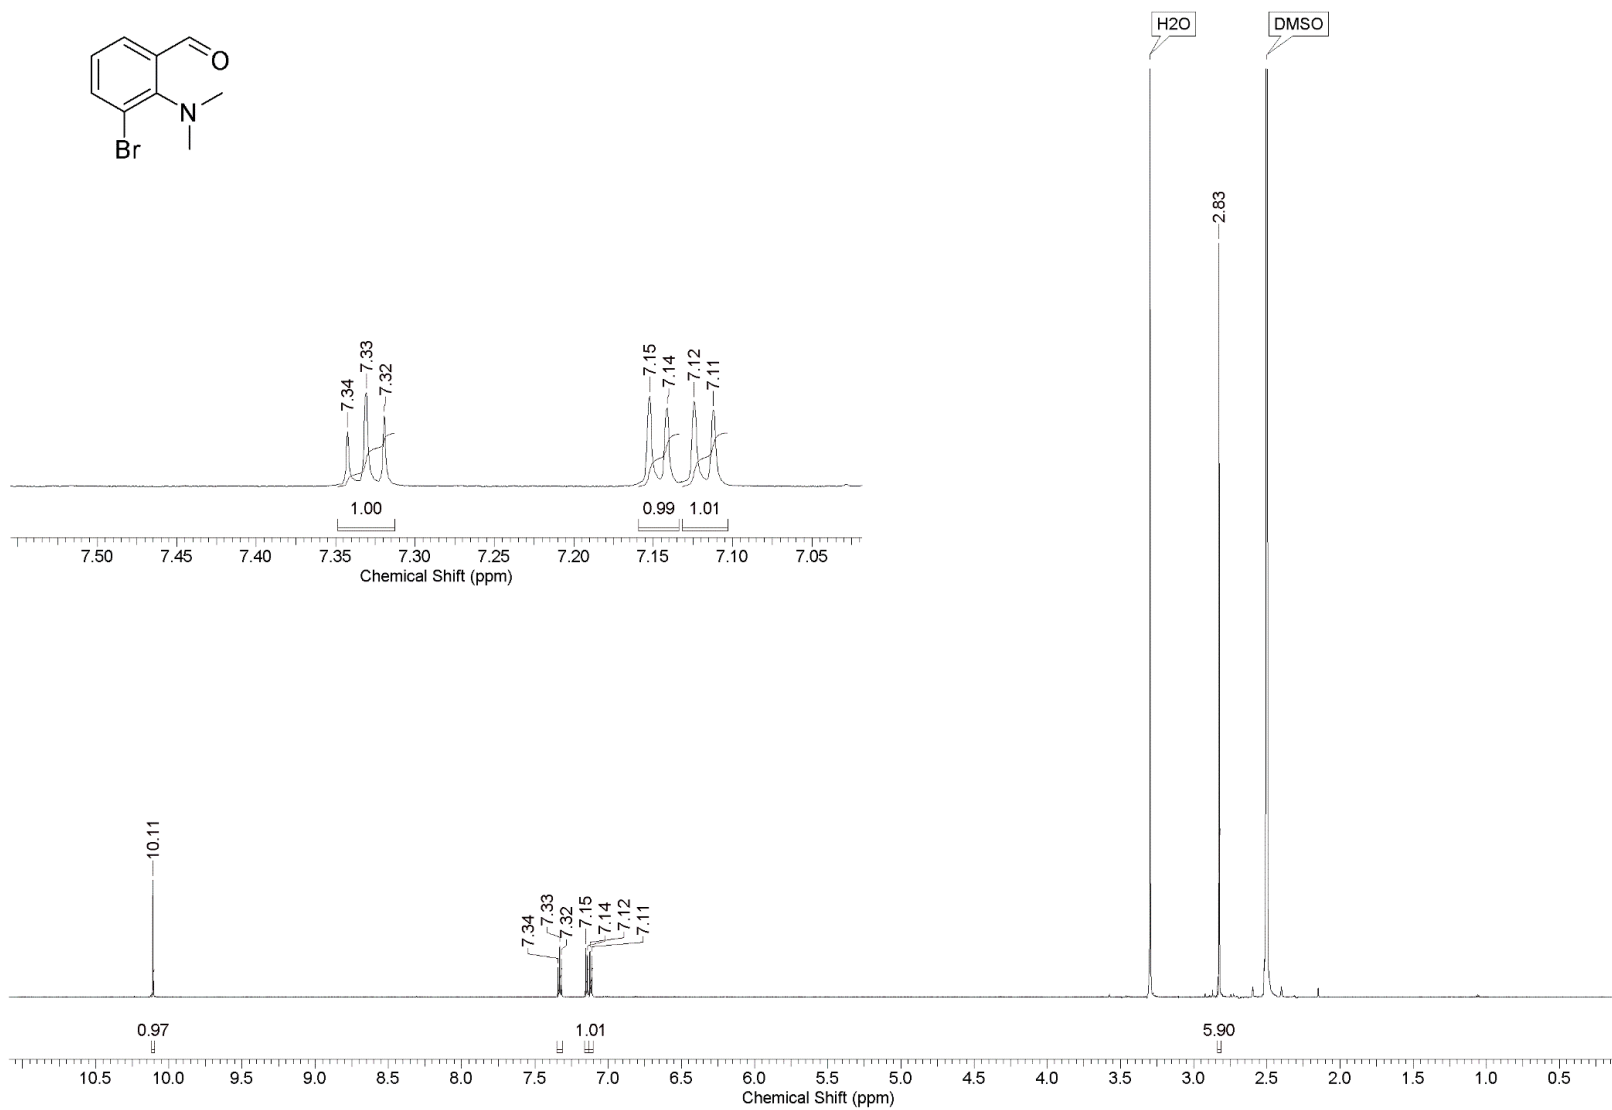

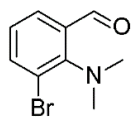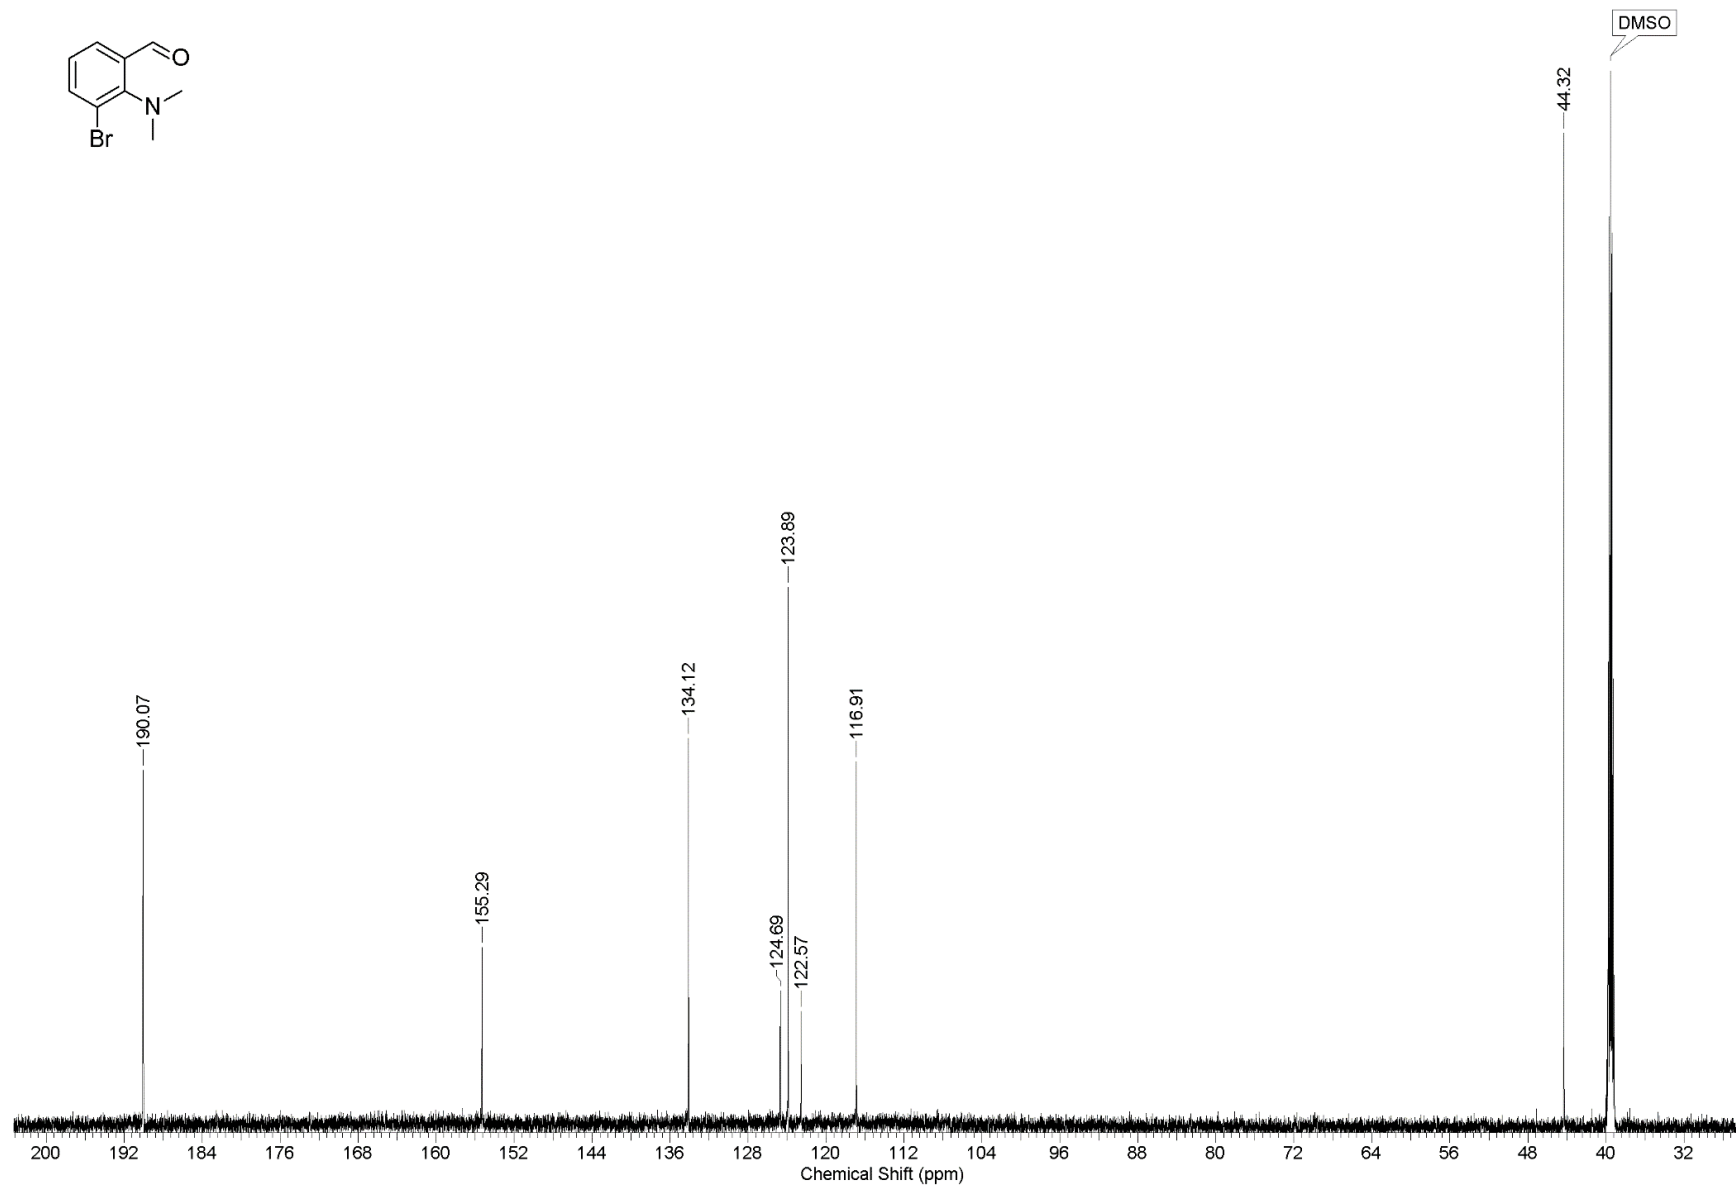

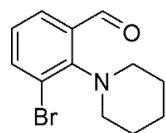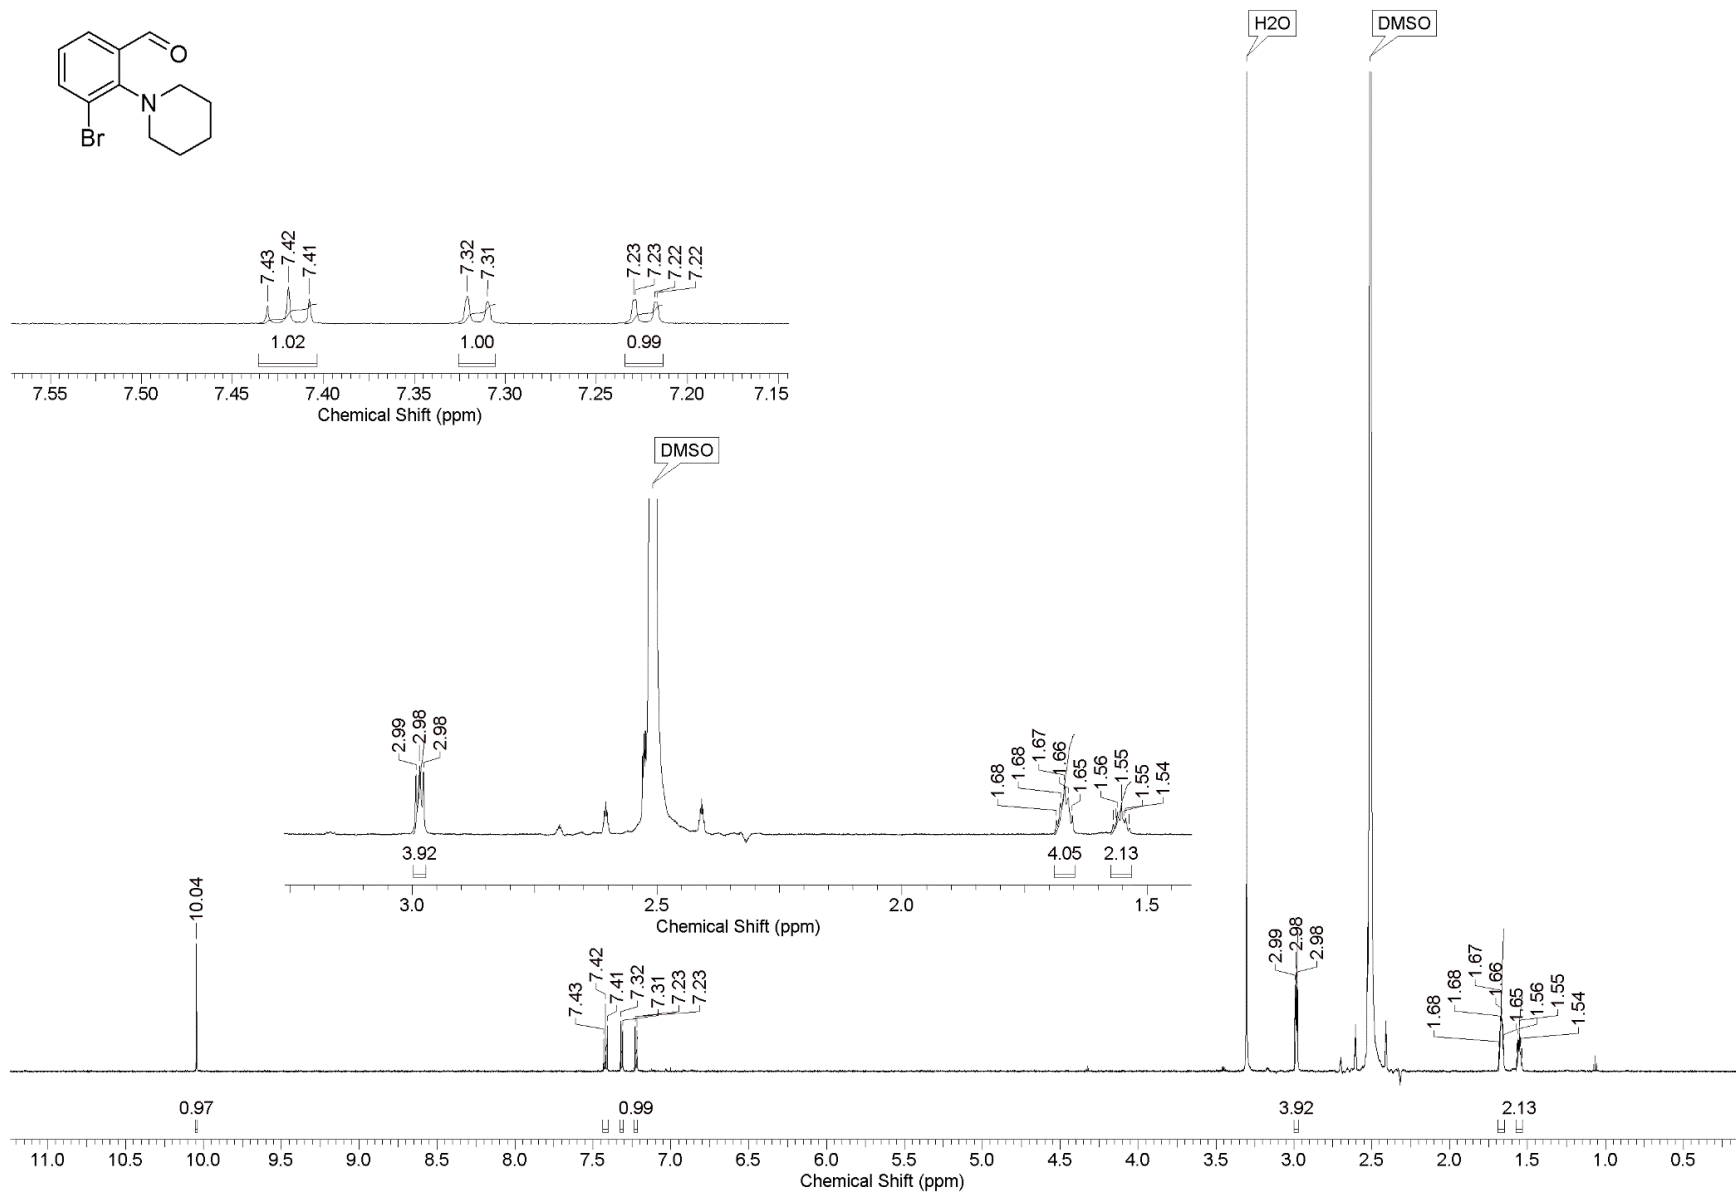

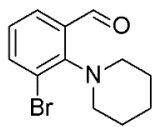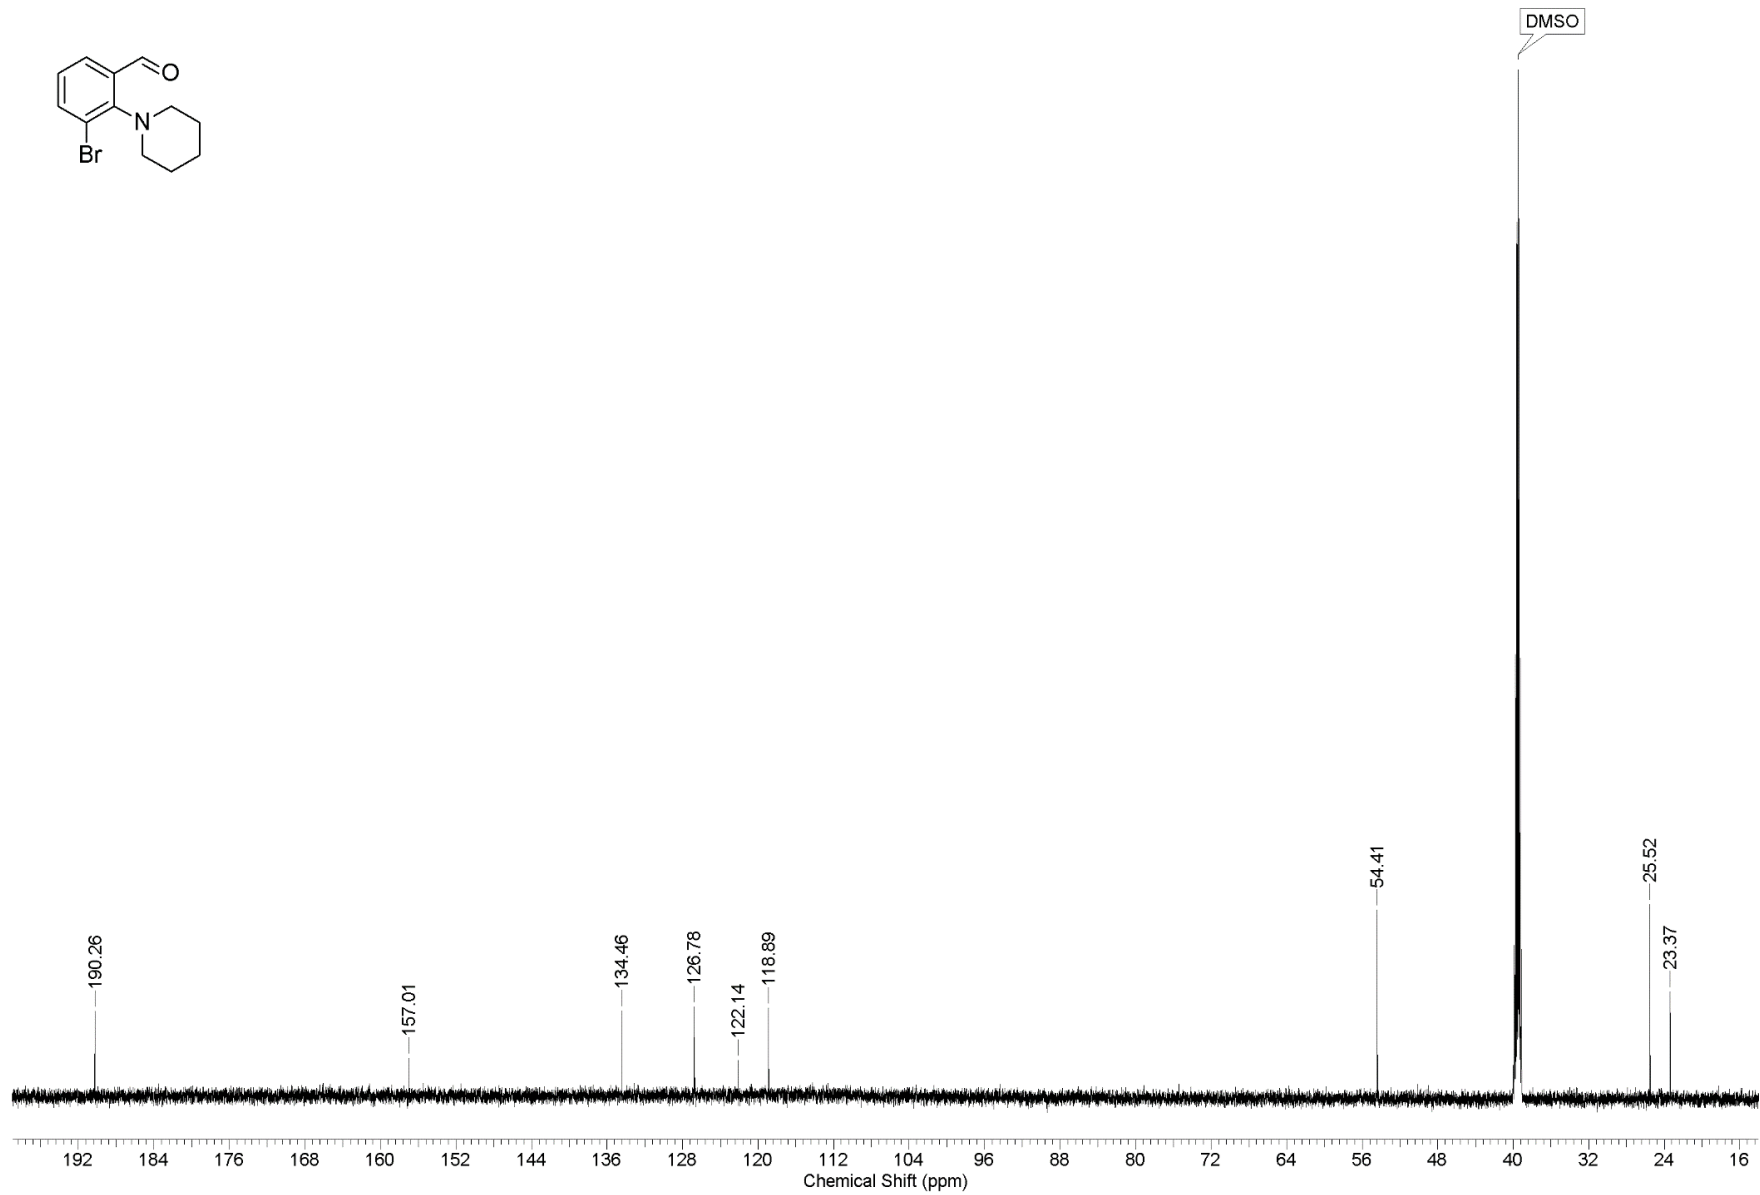

S48



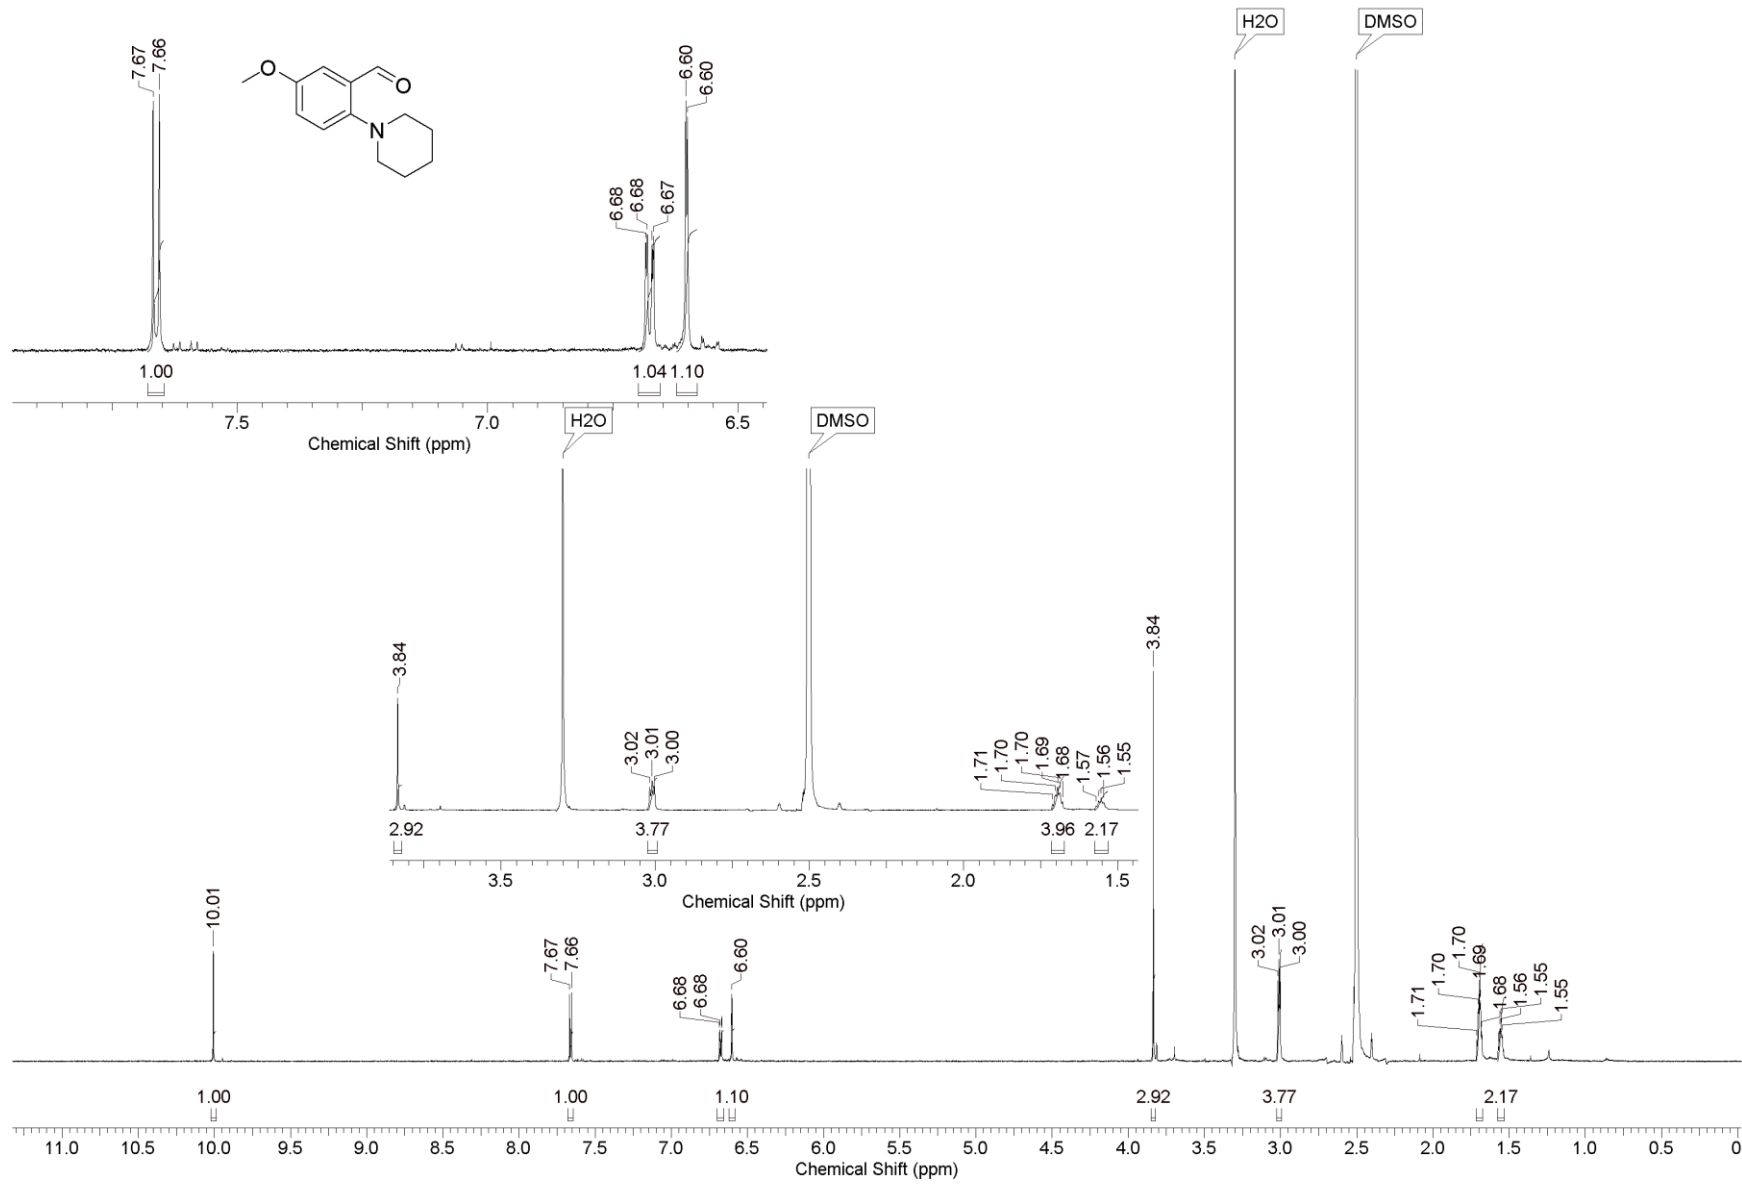

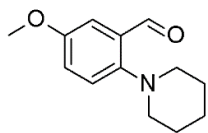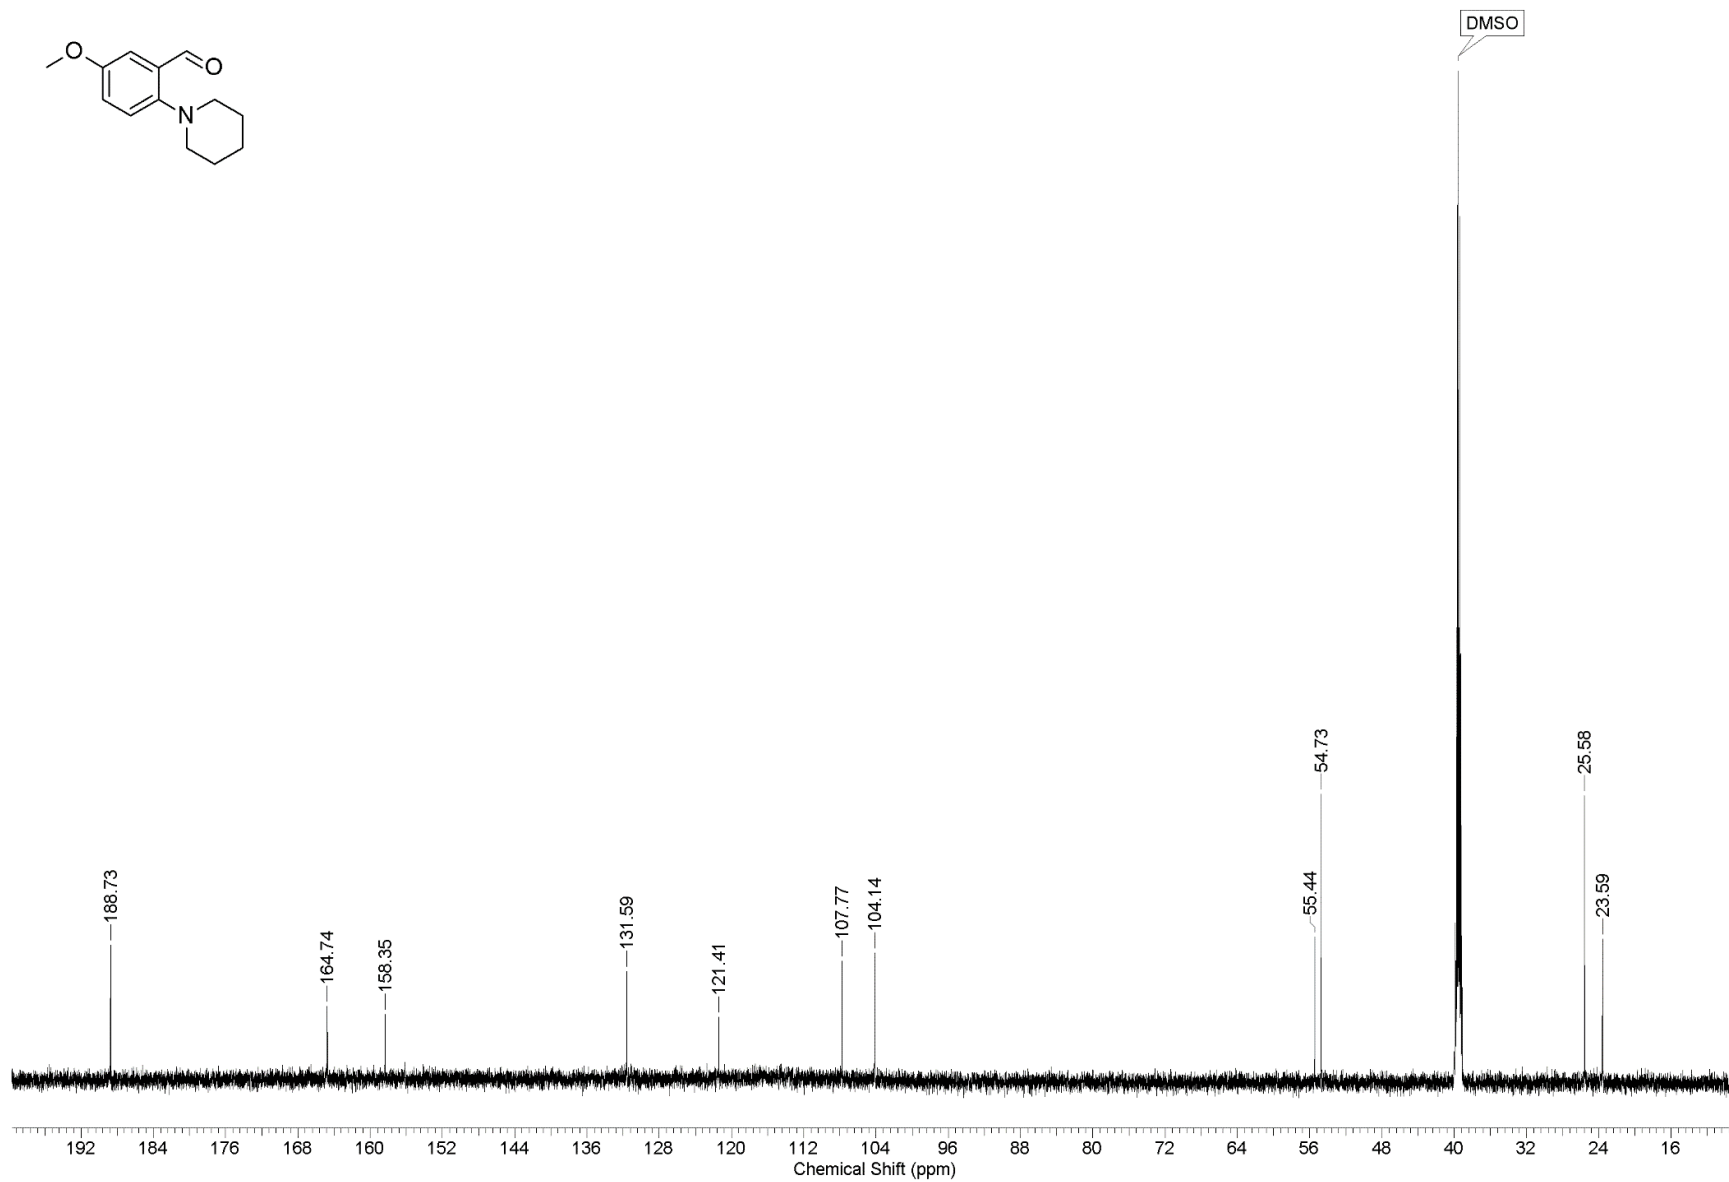

S50

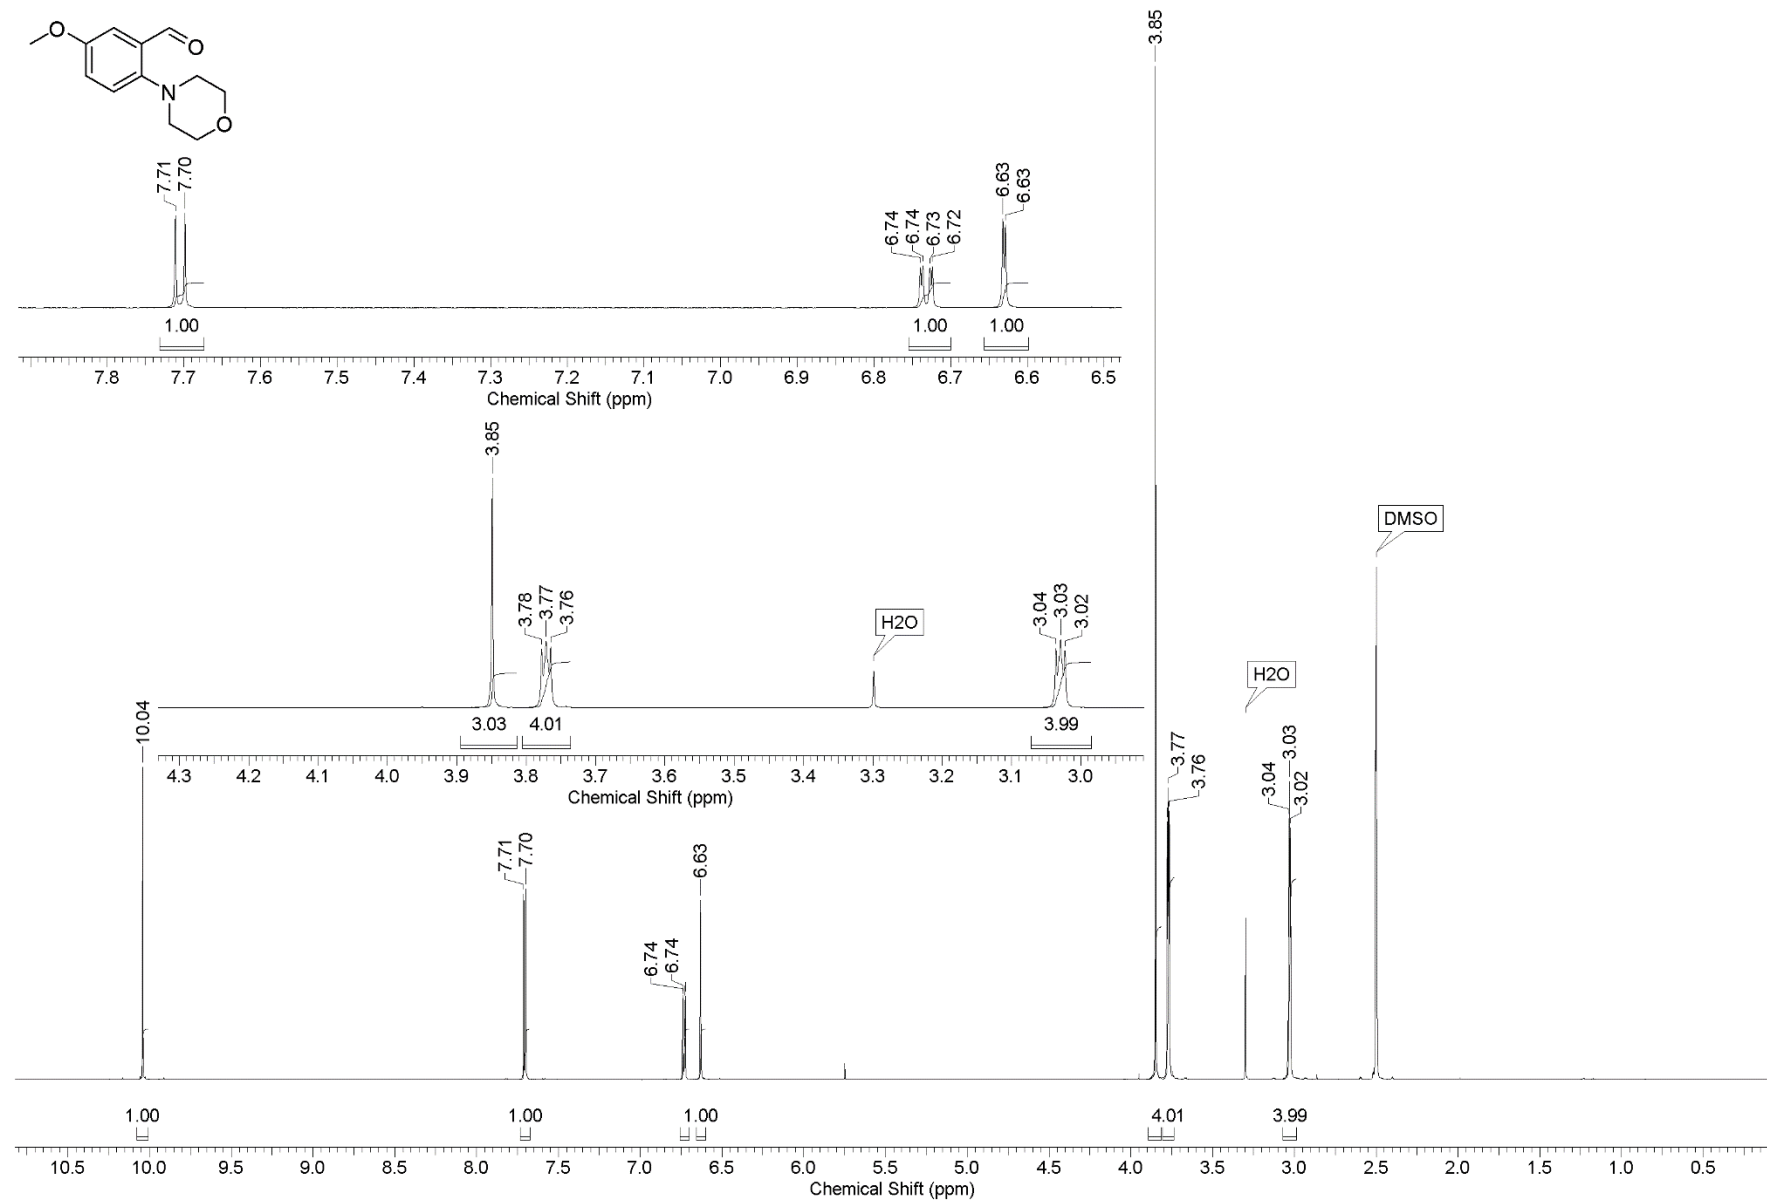

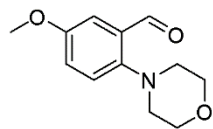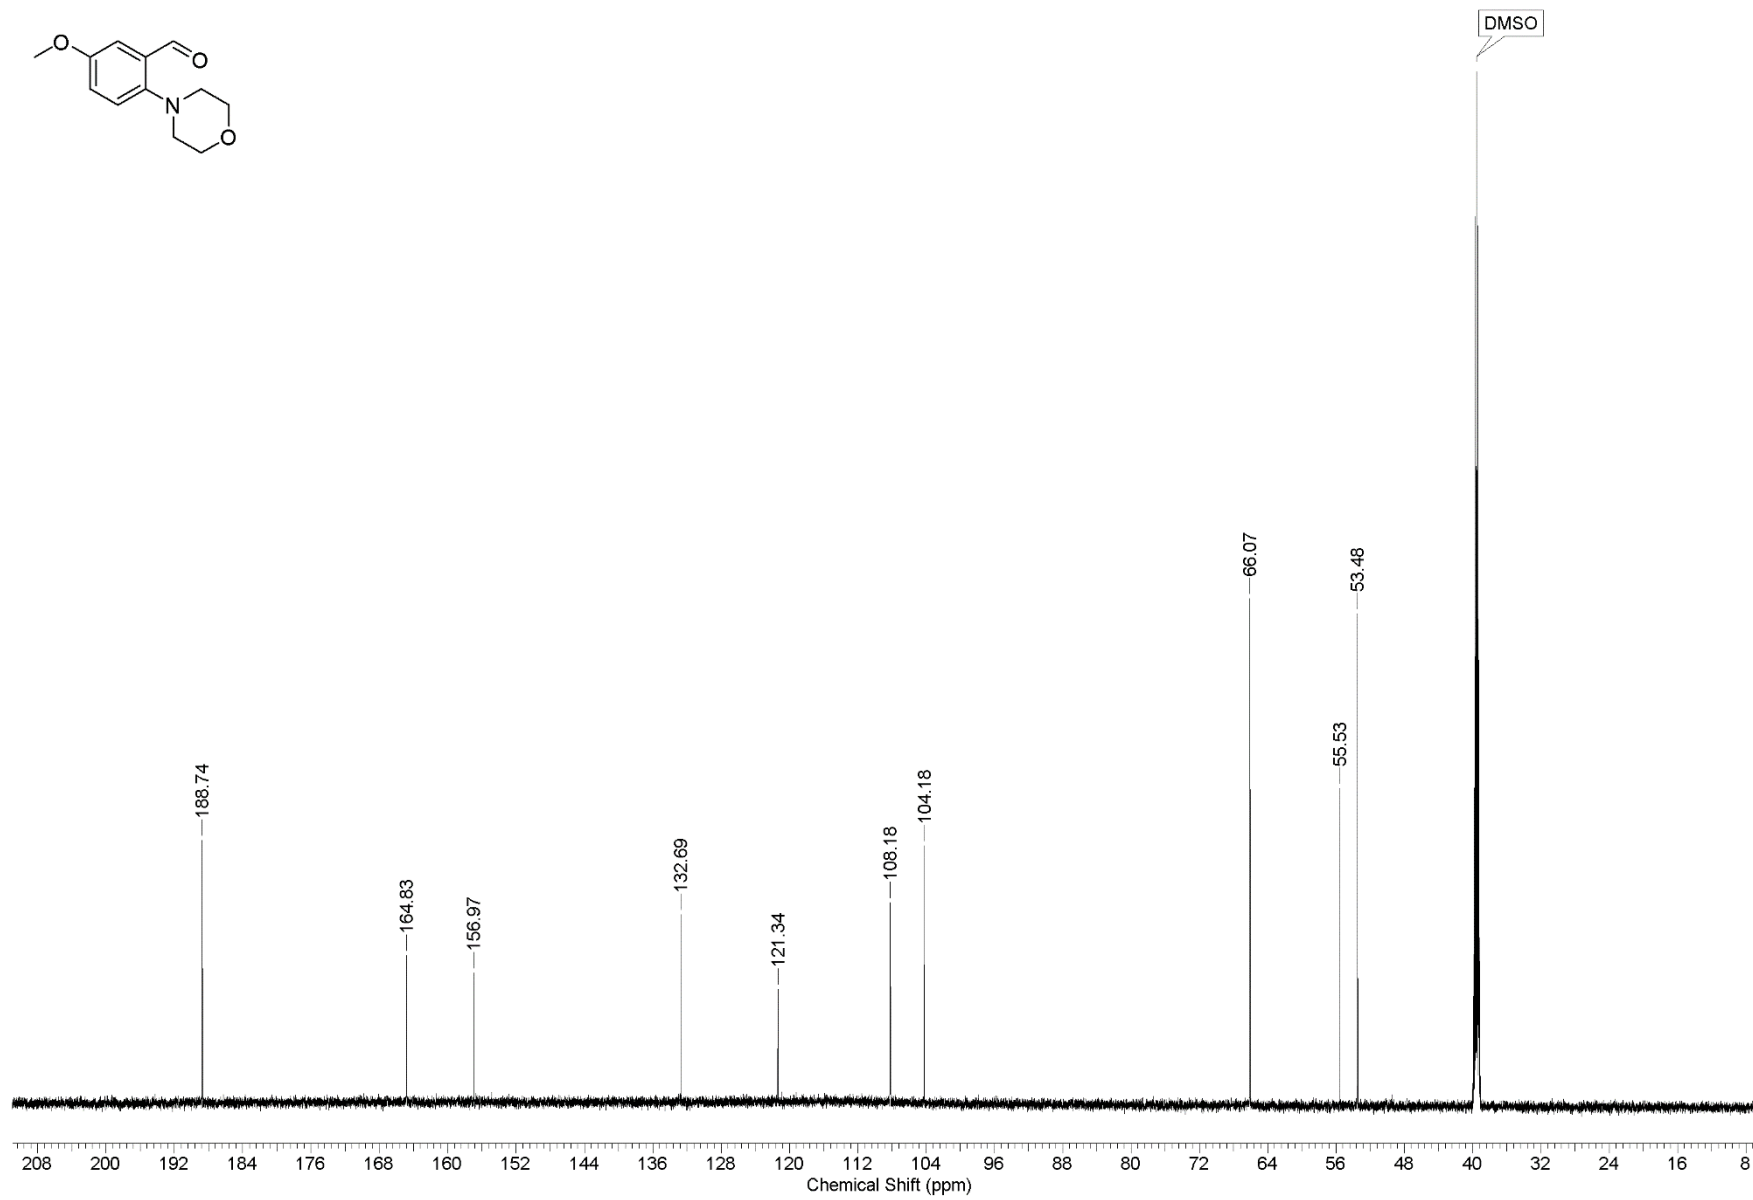

S52

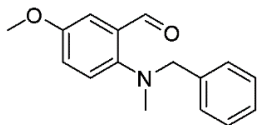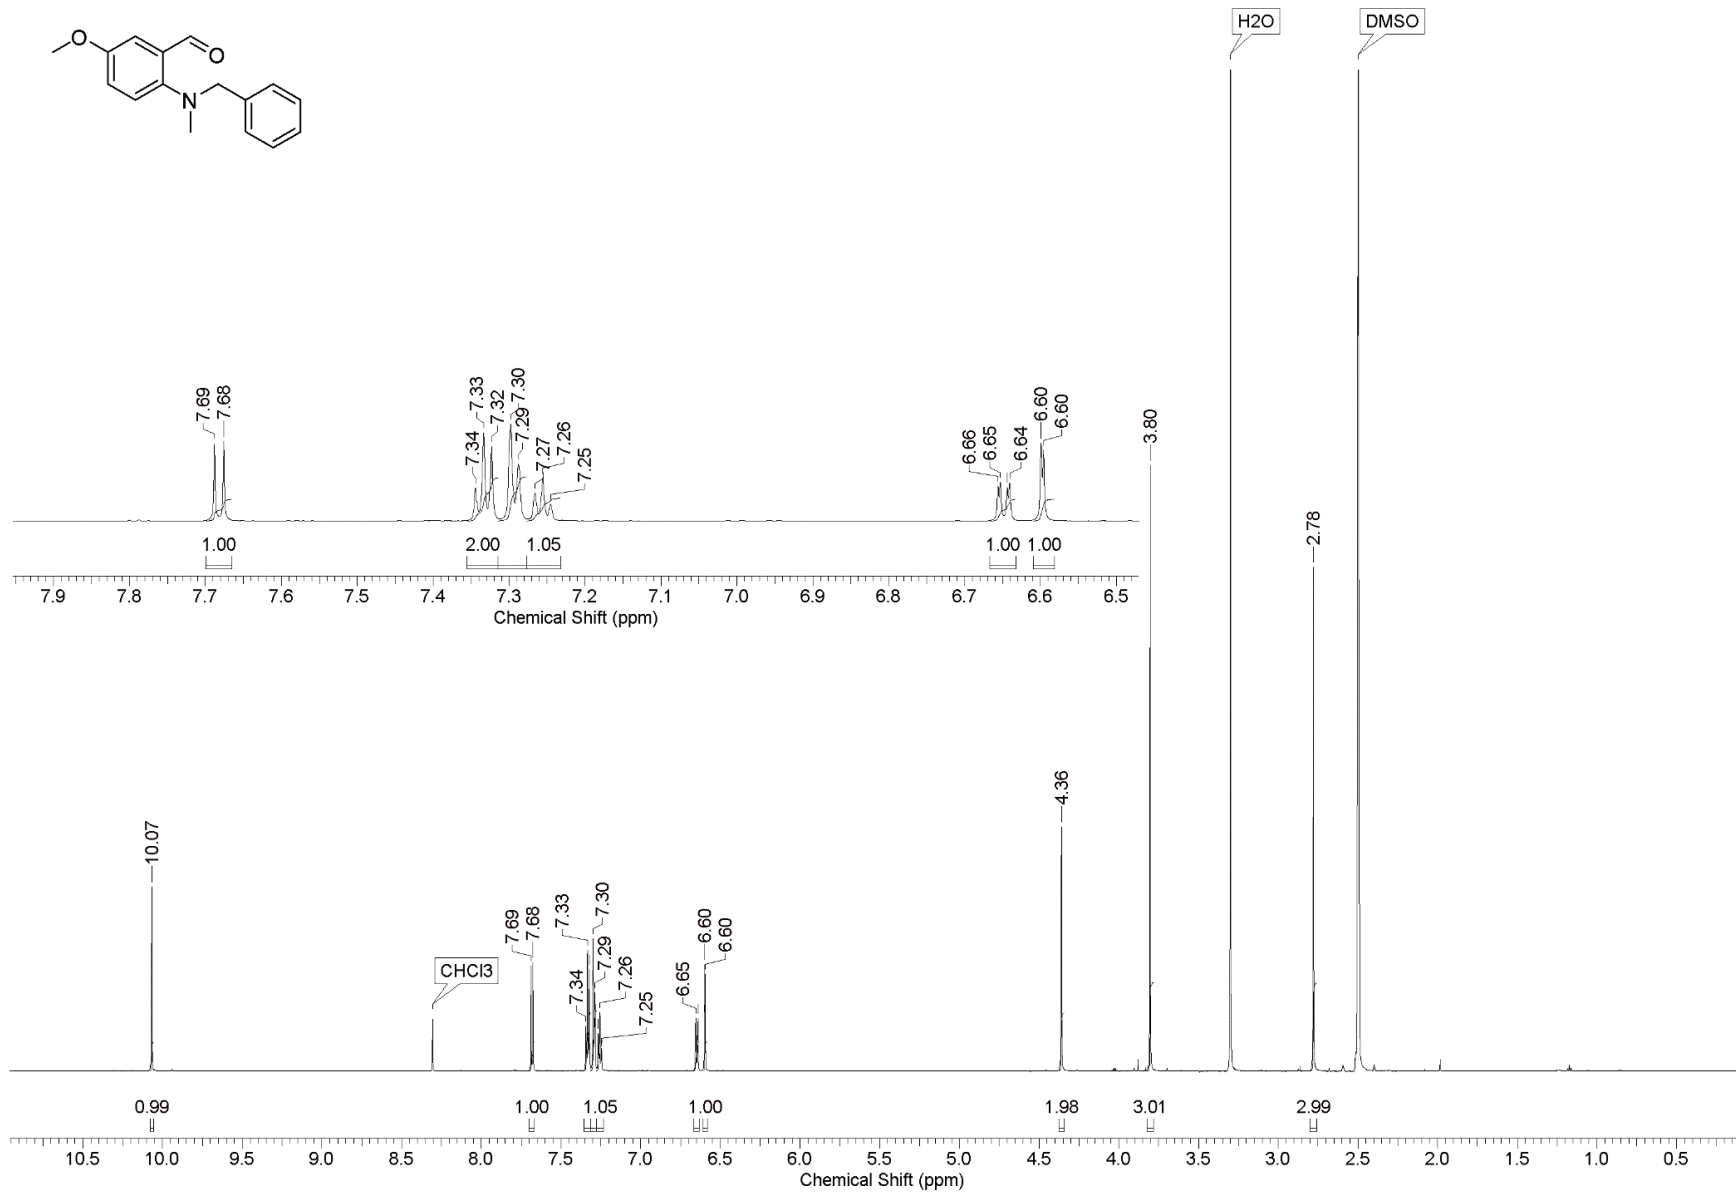

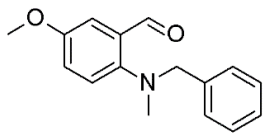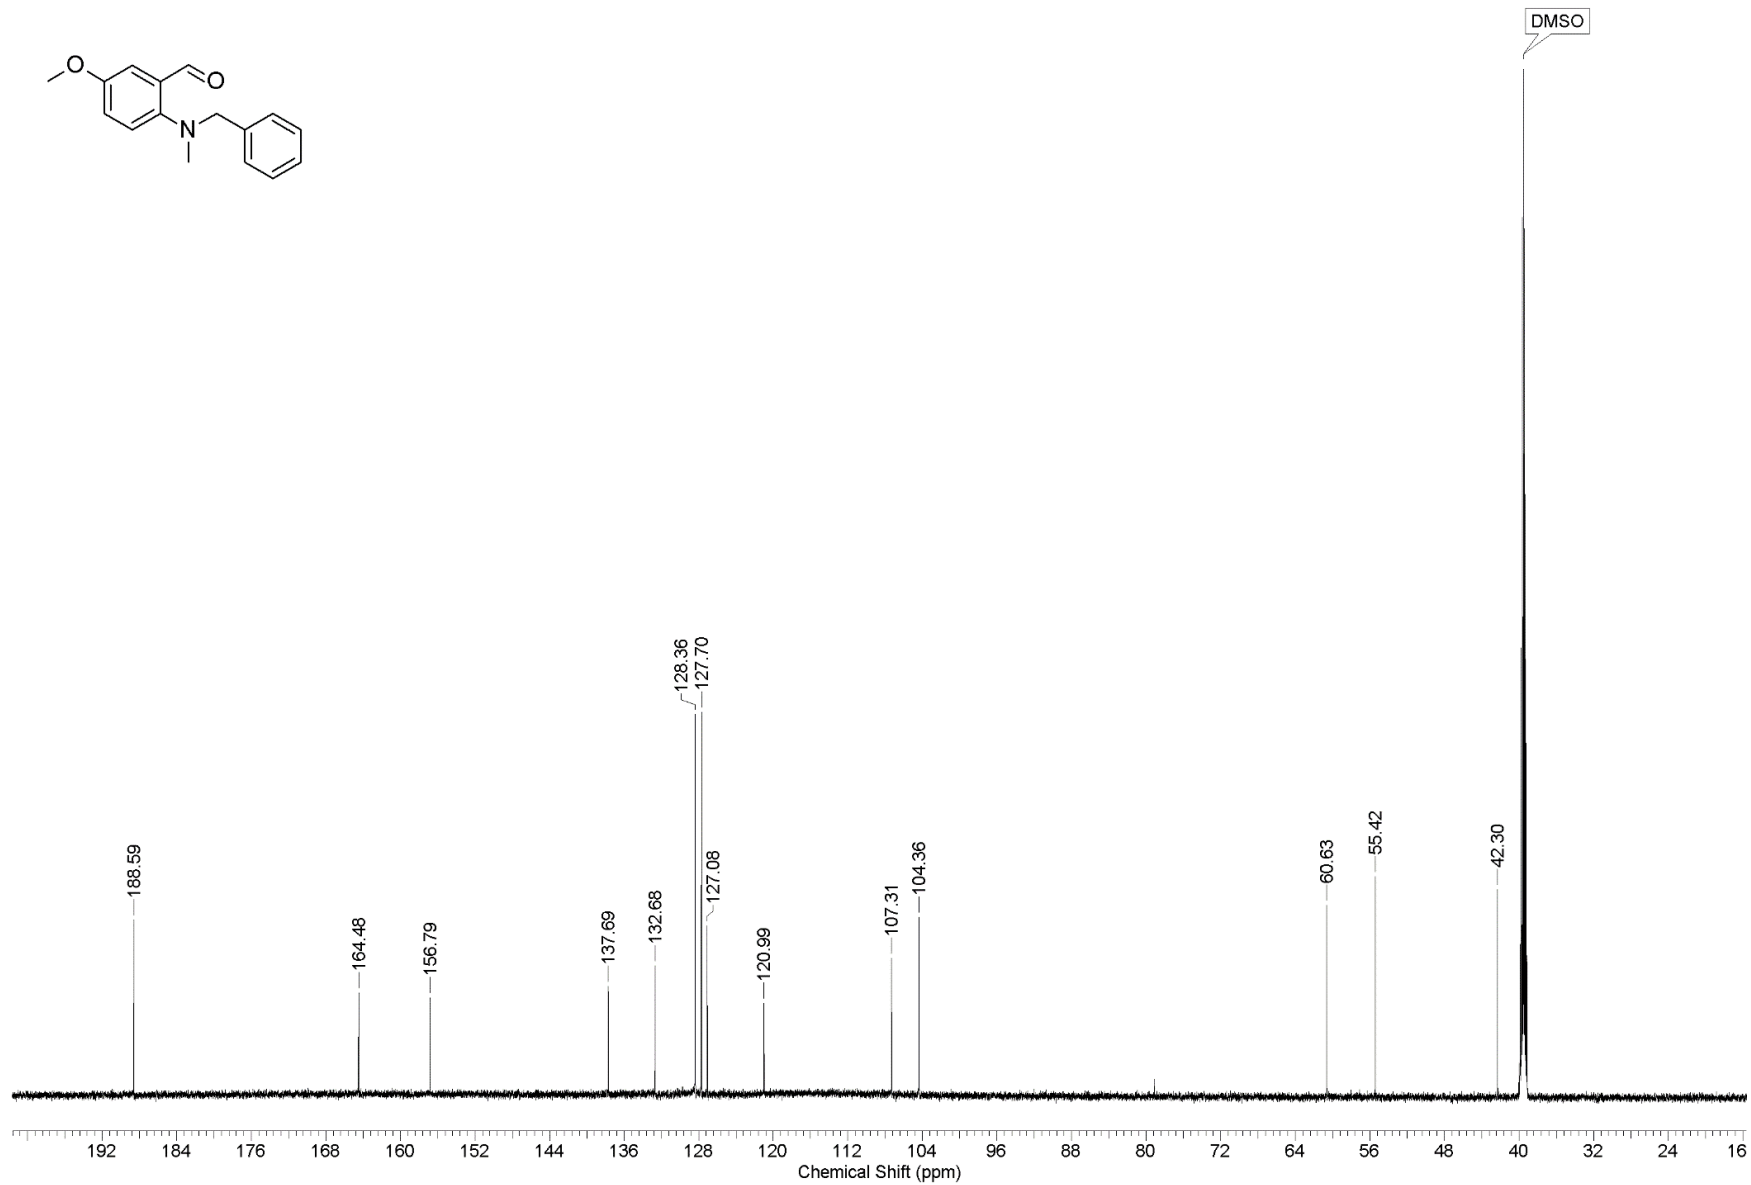

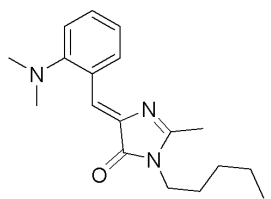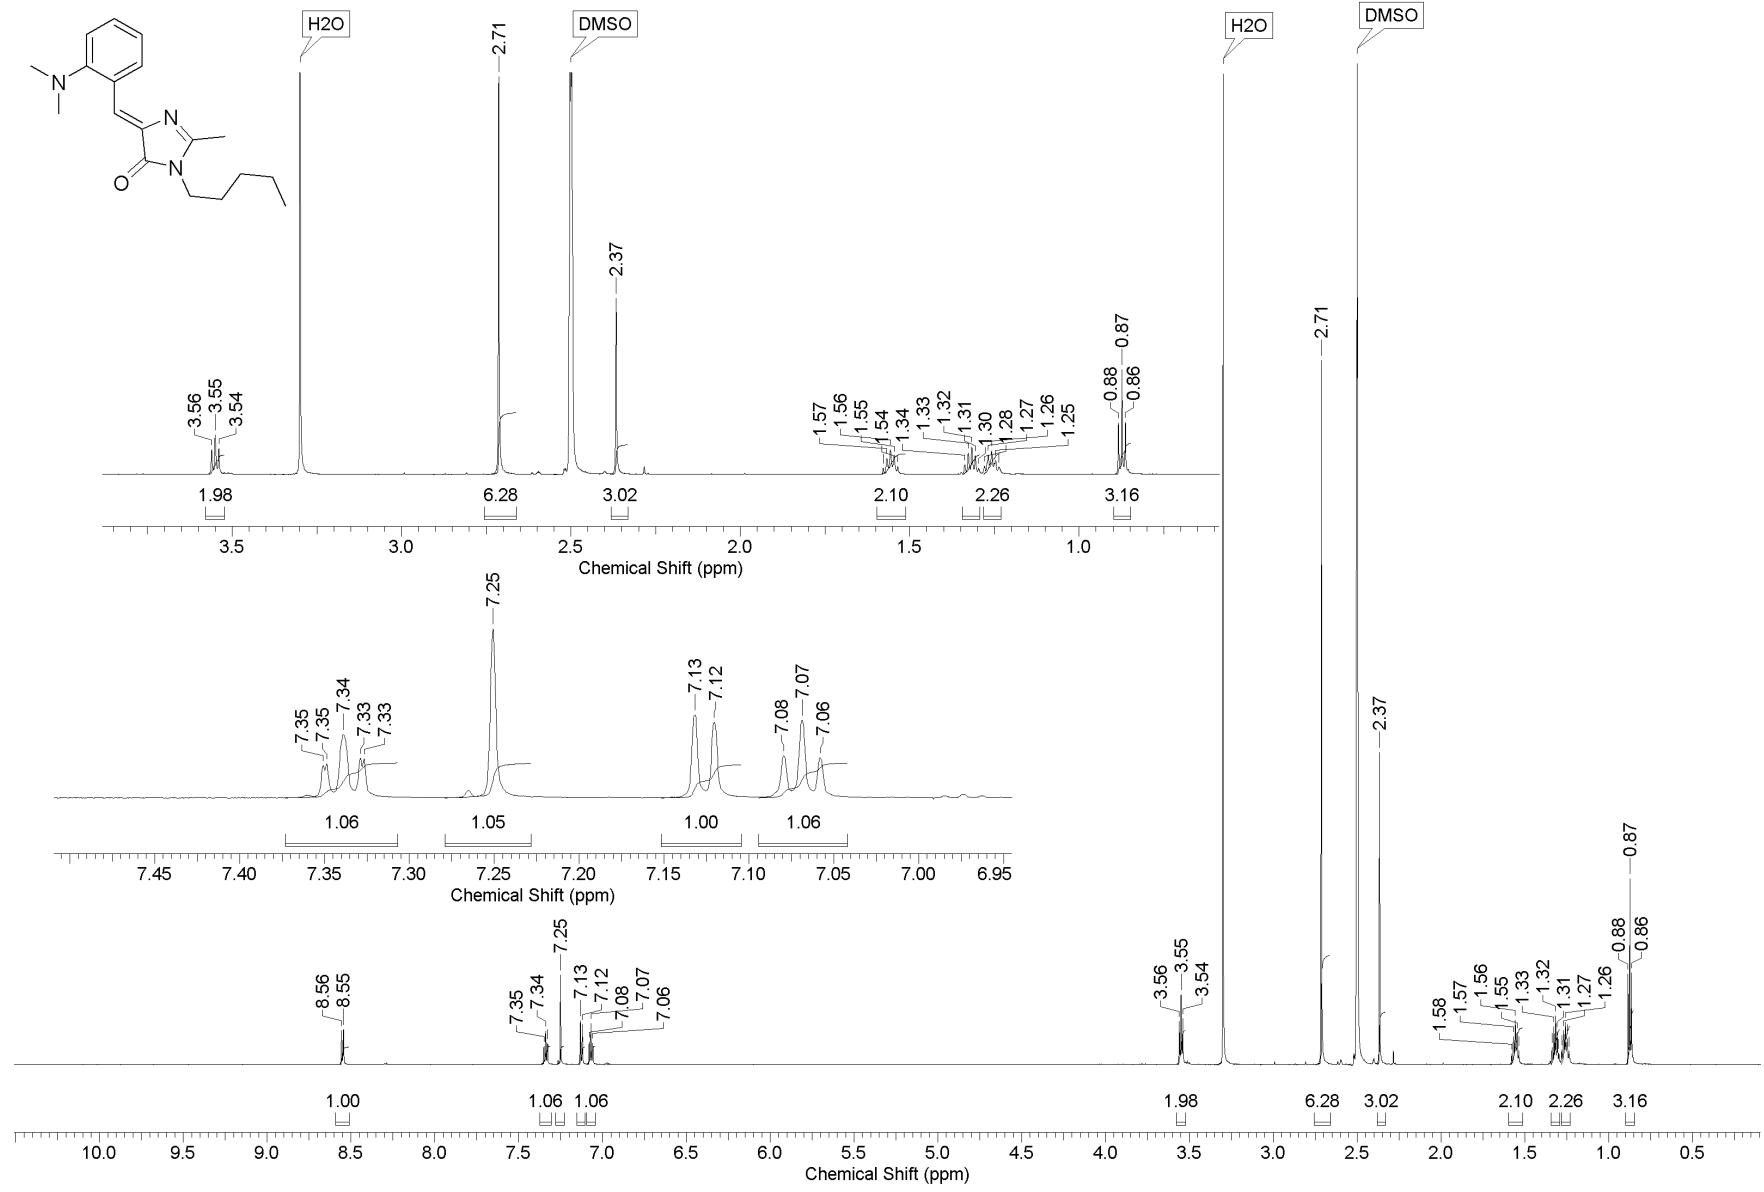





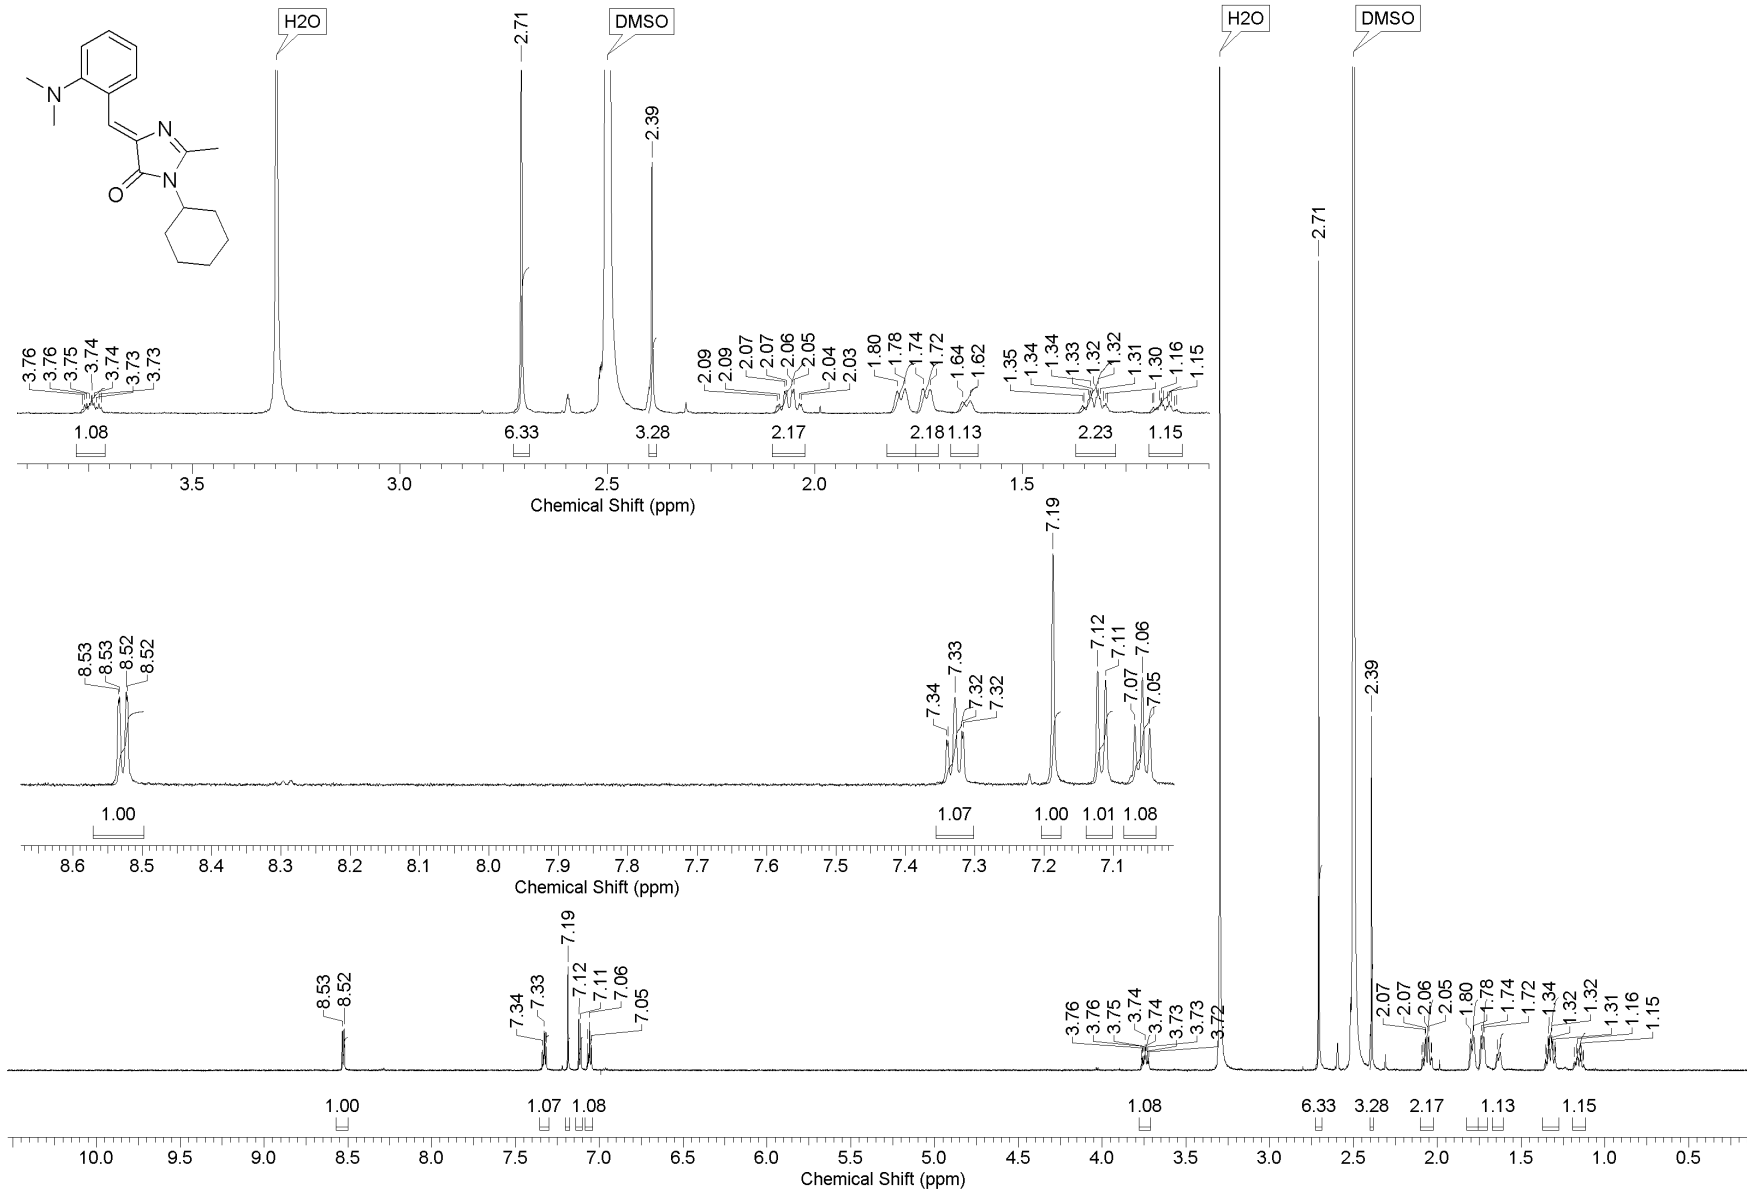

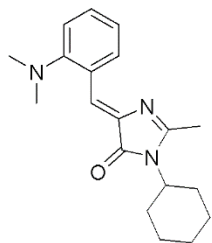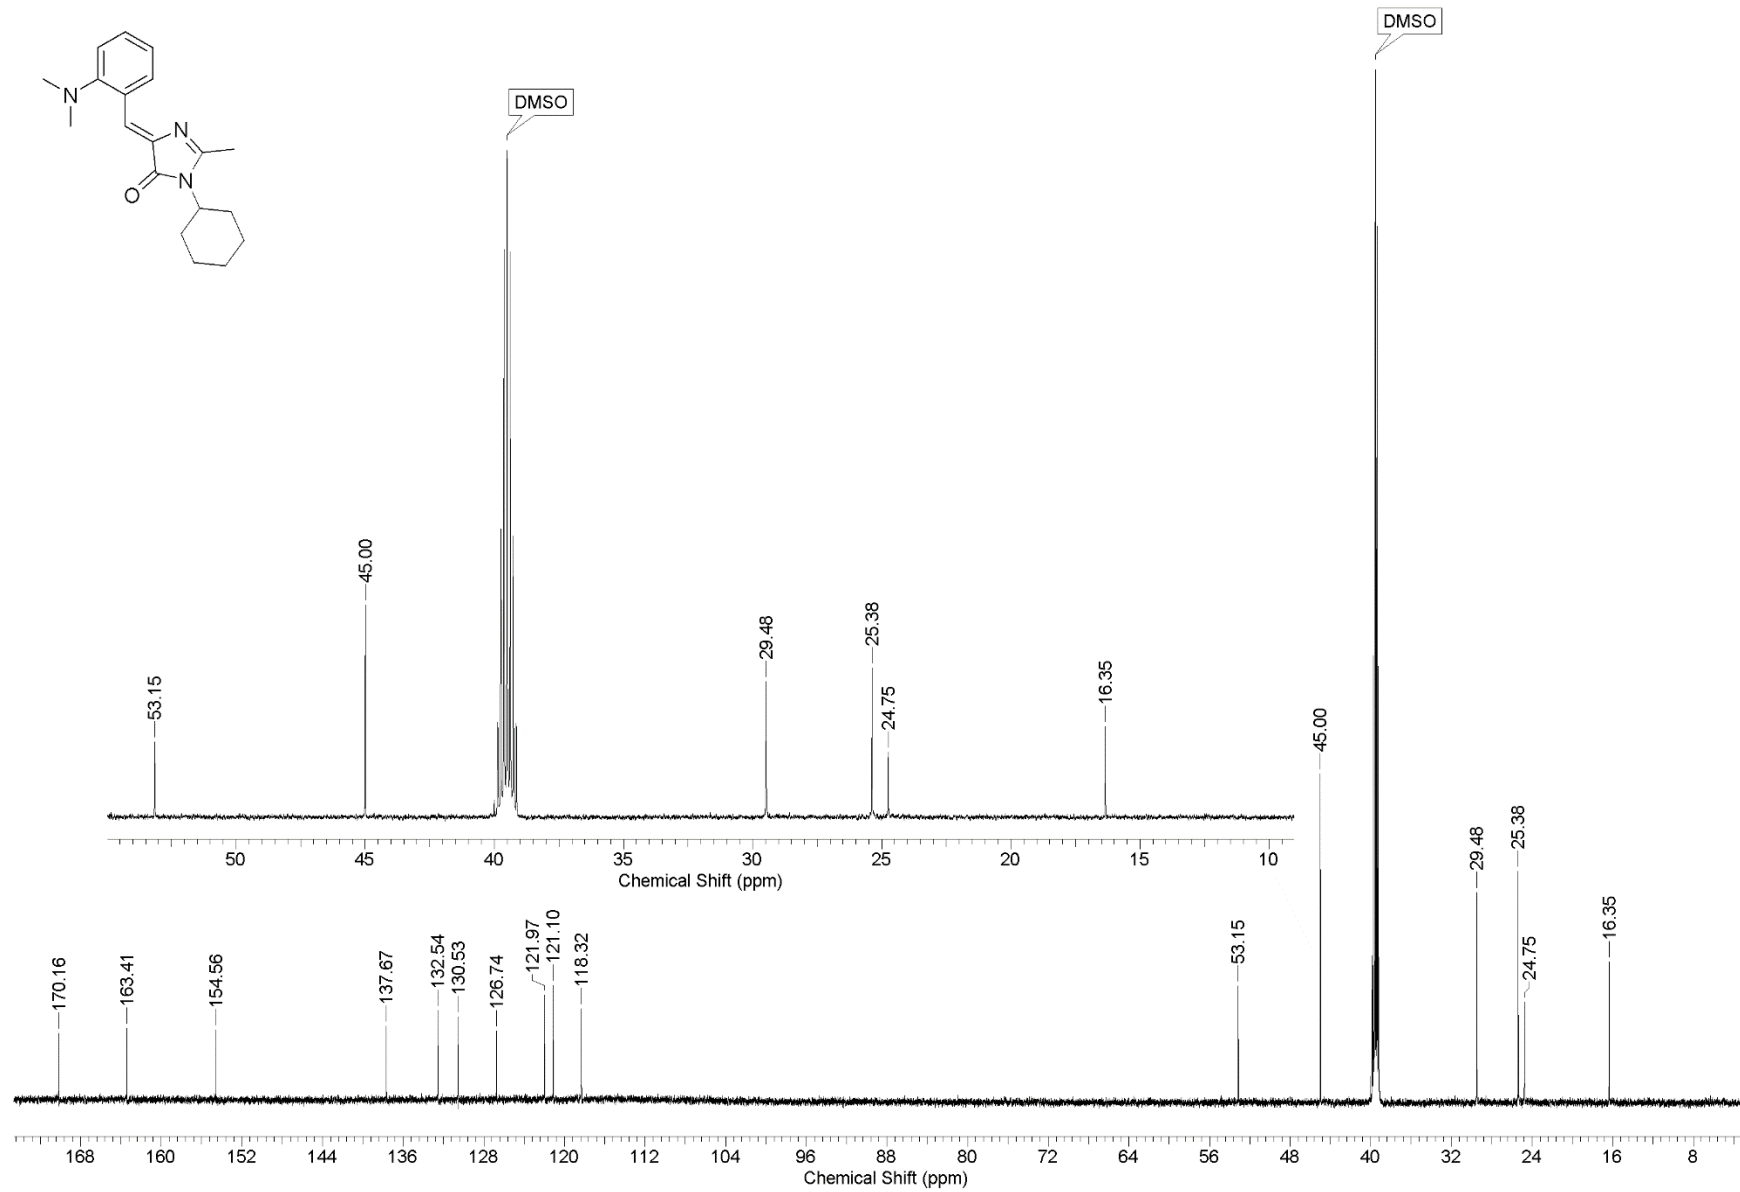

S58

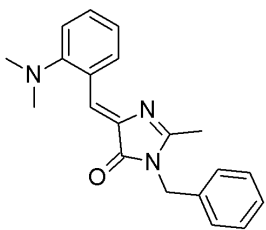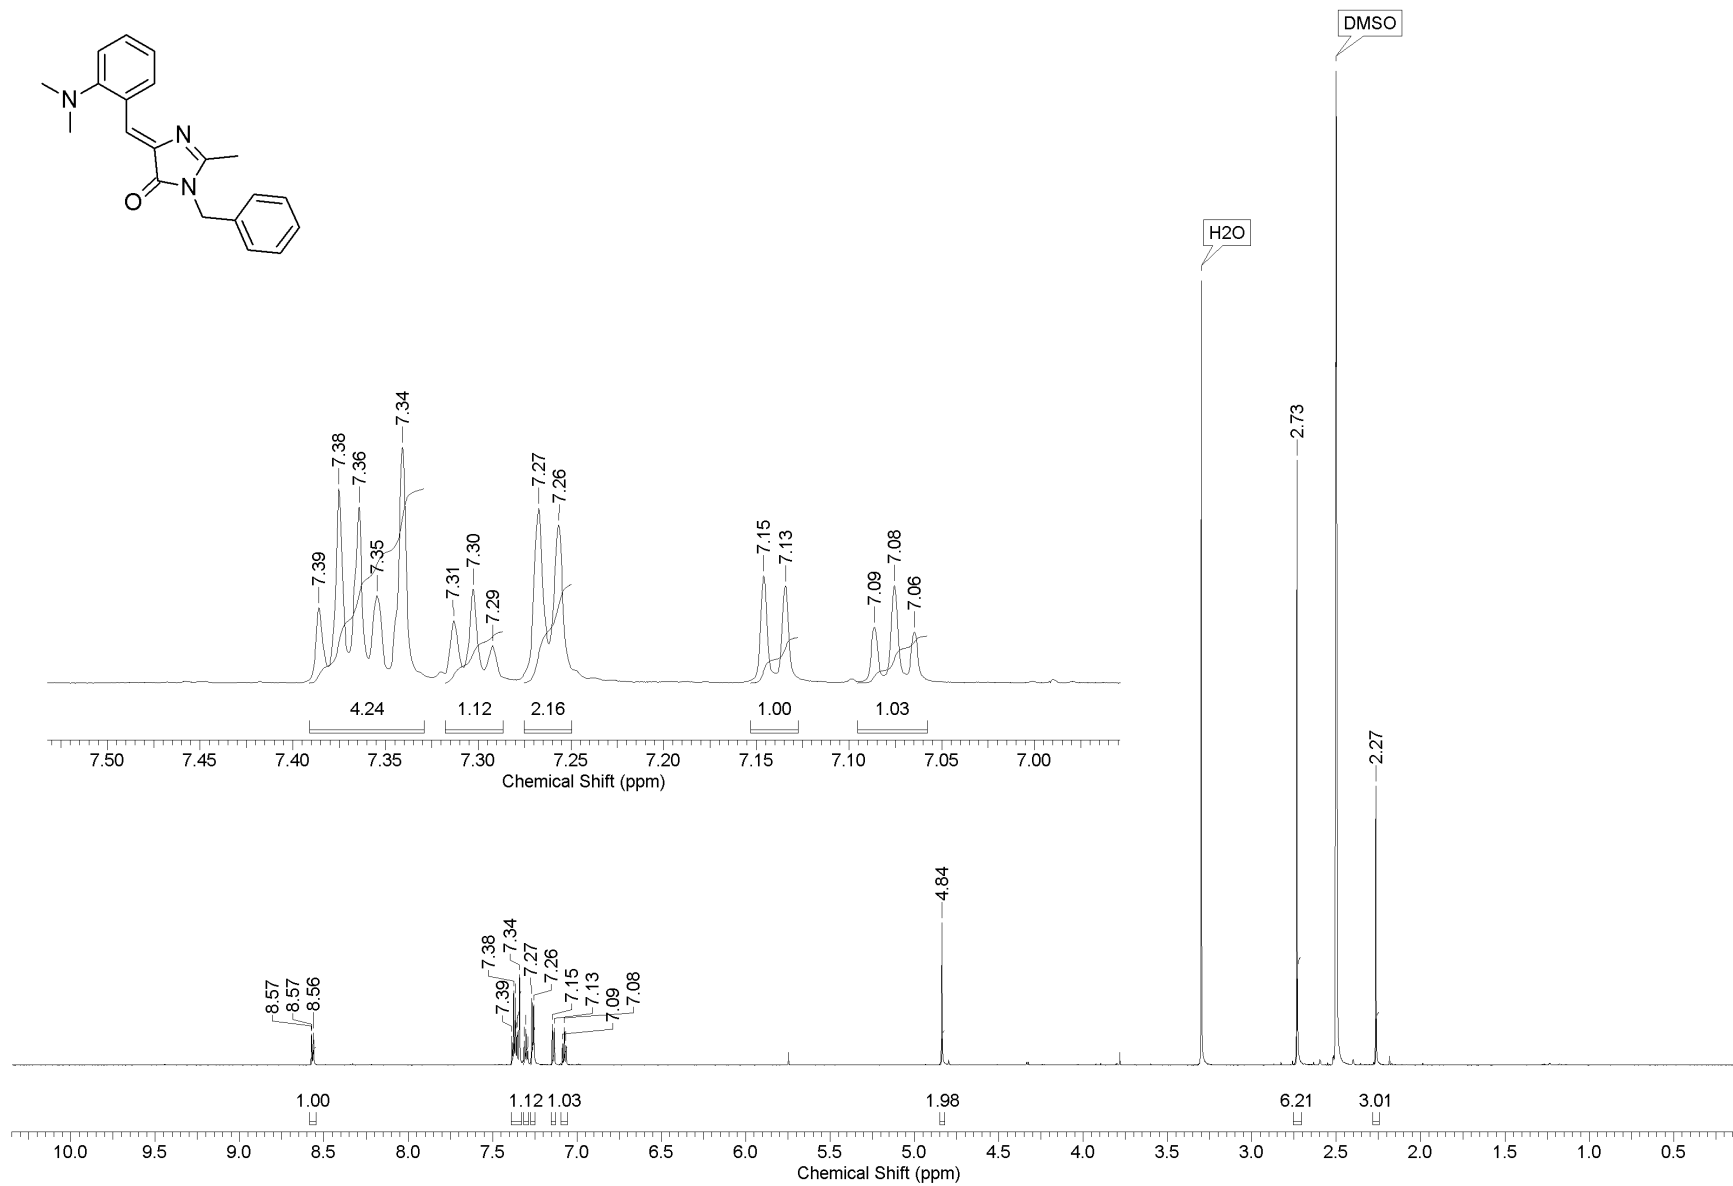

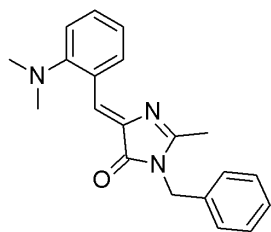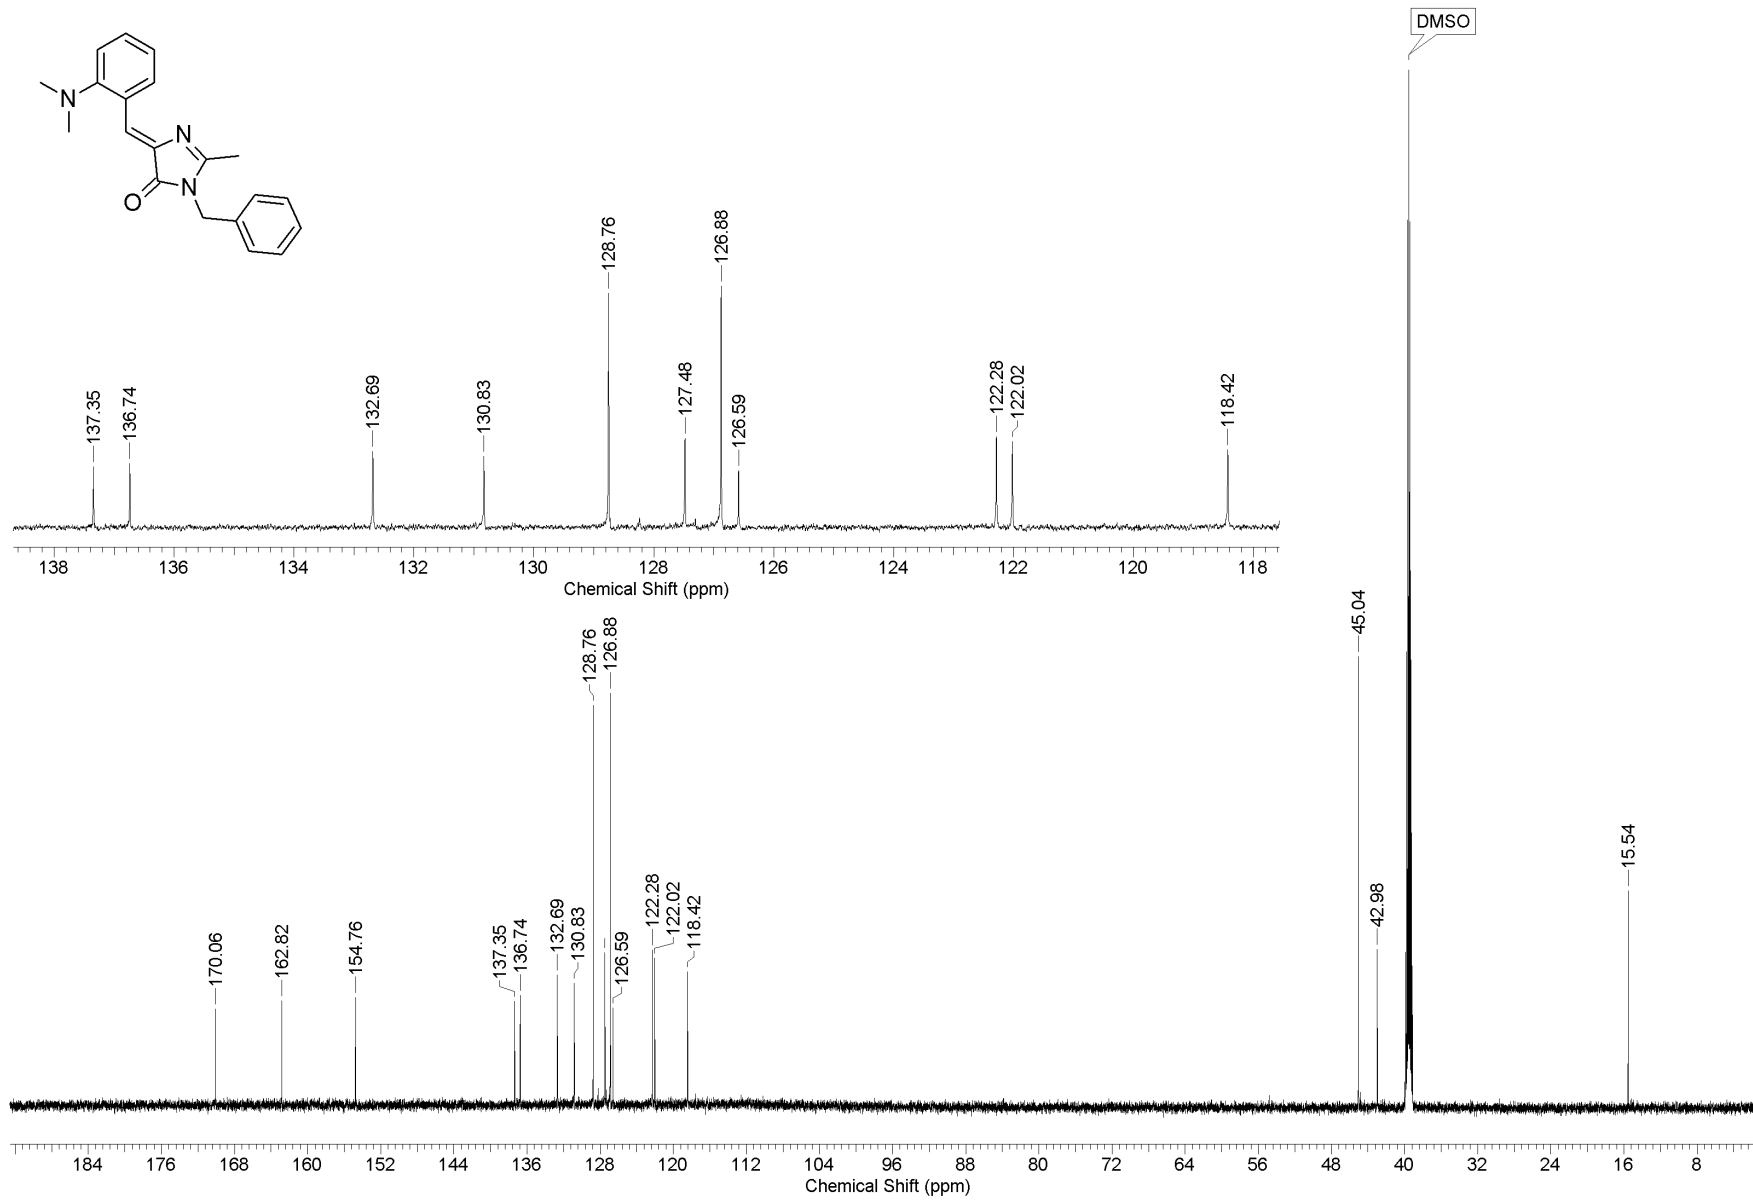

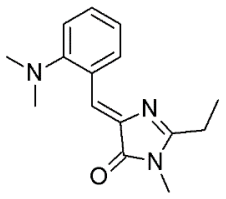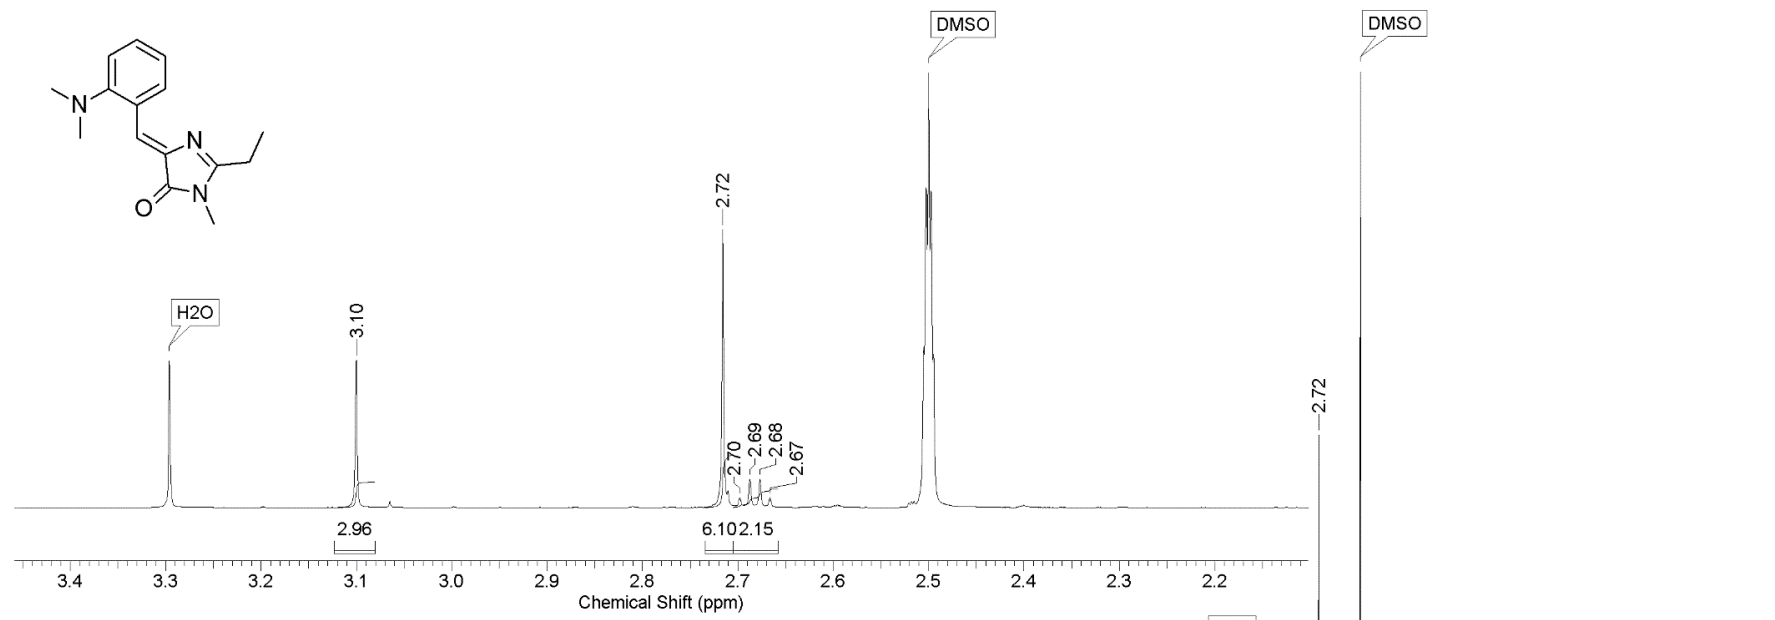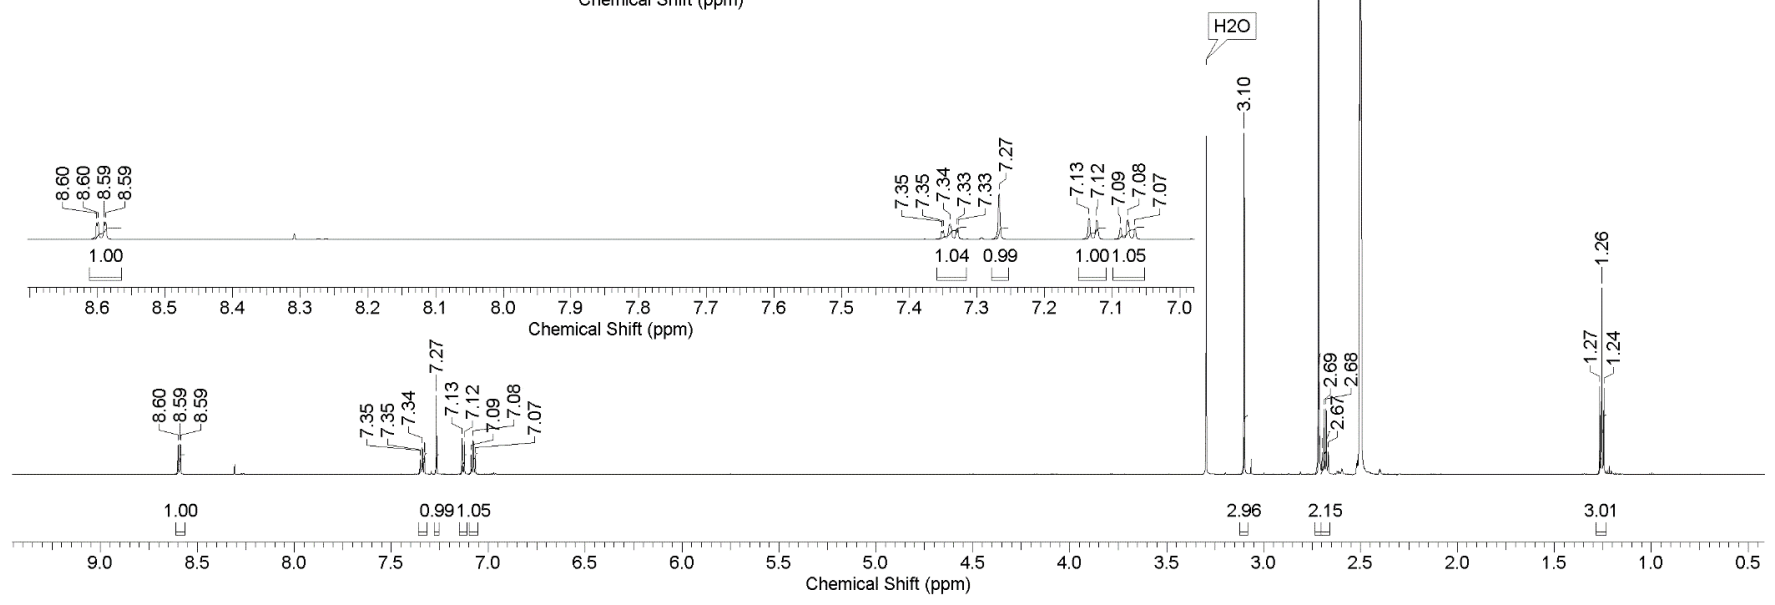

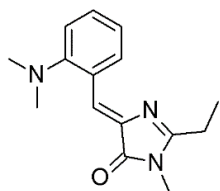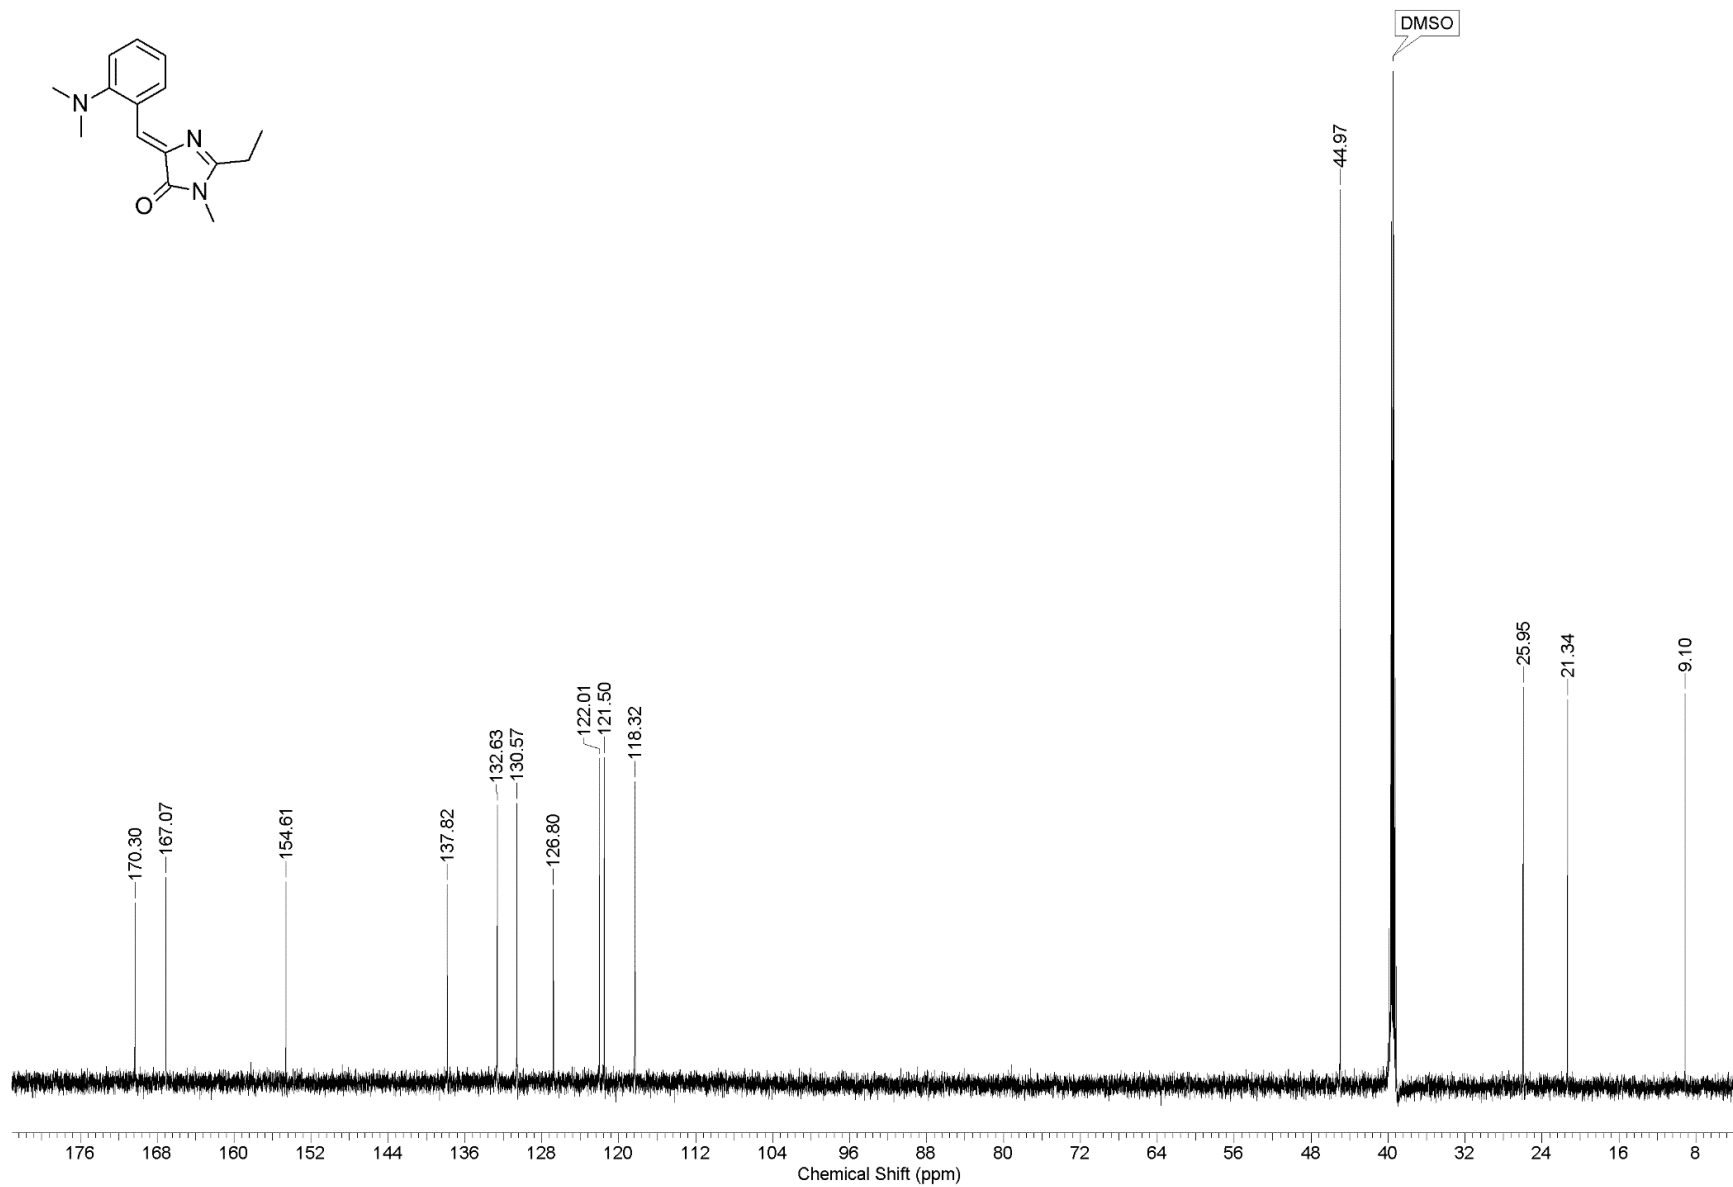

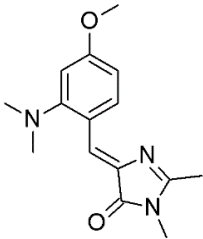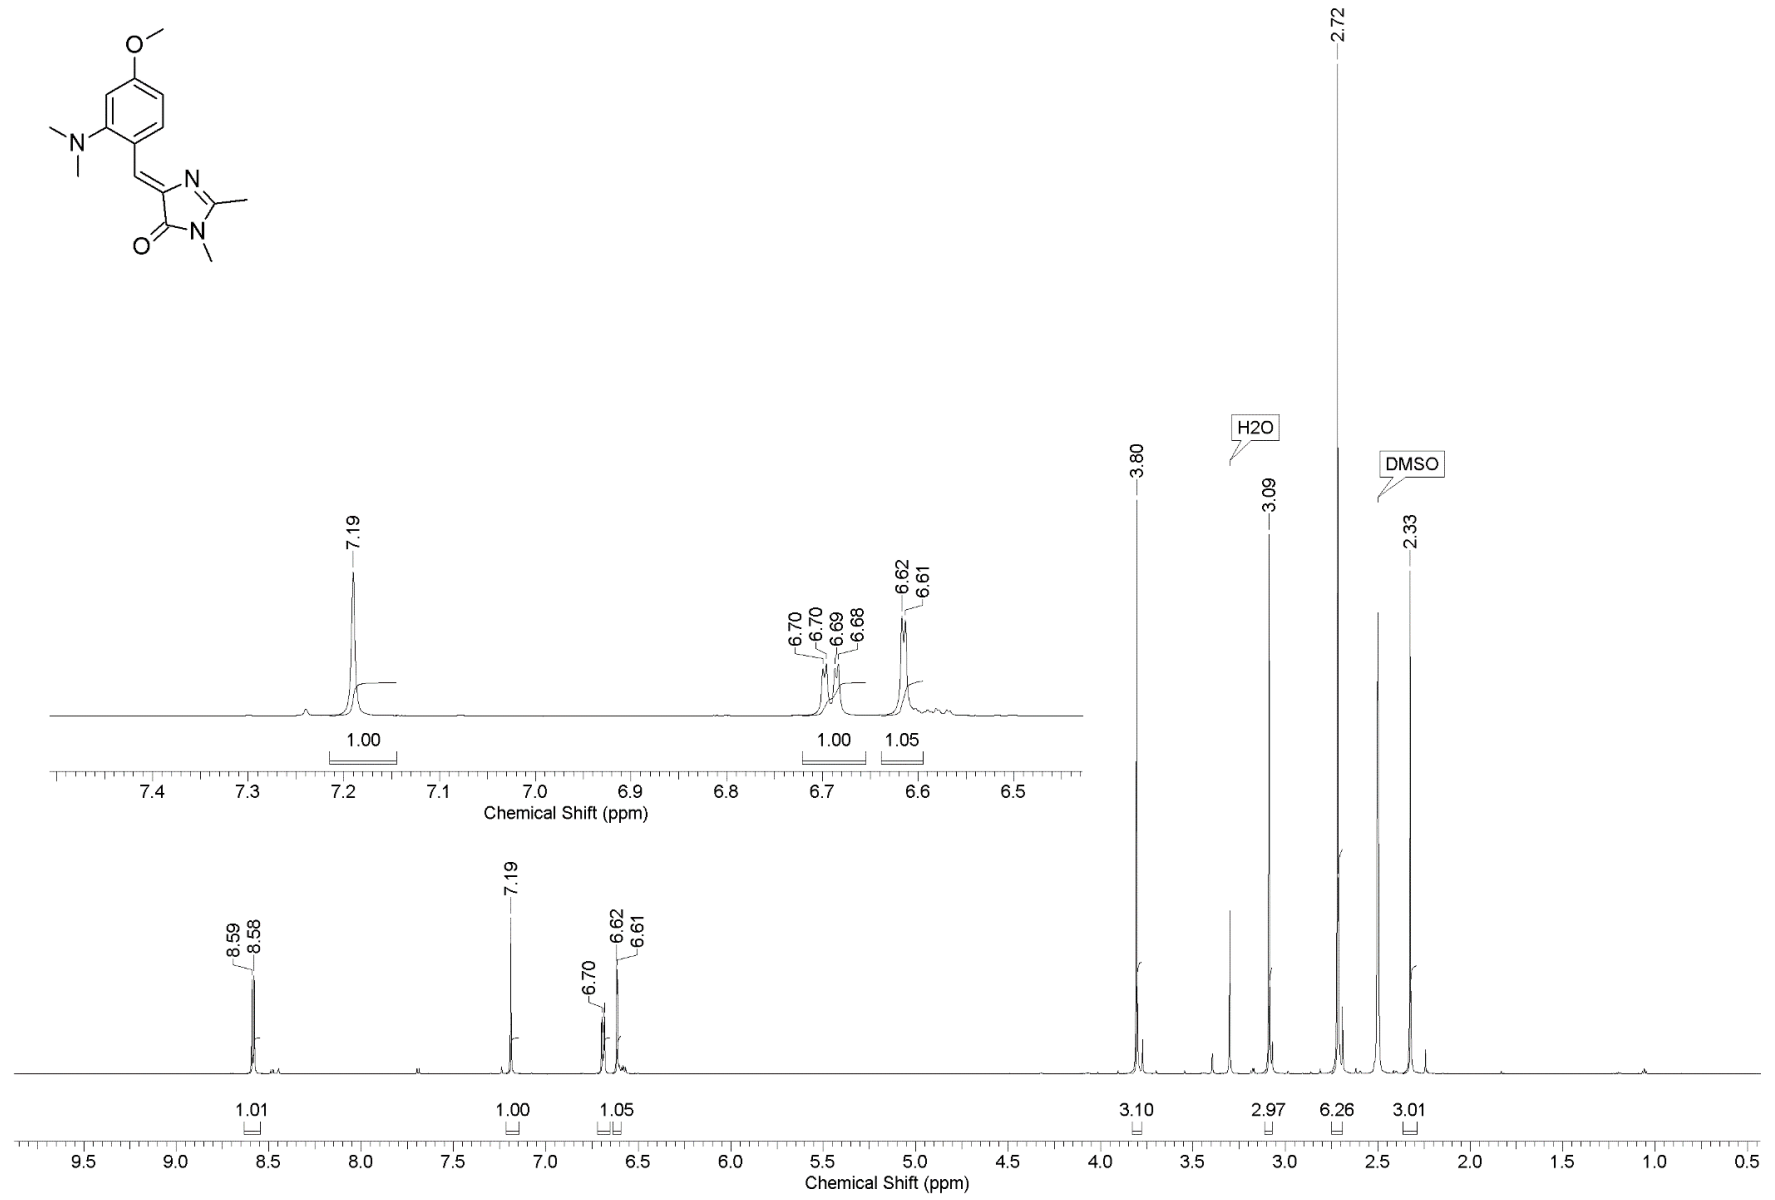

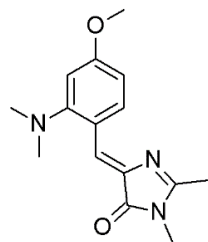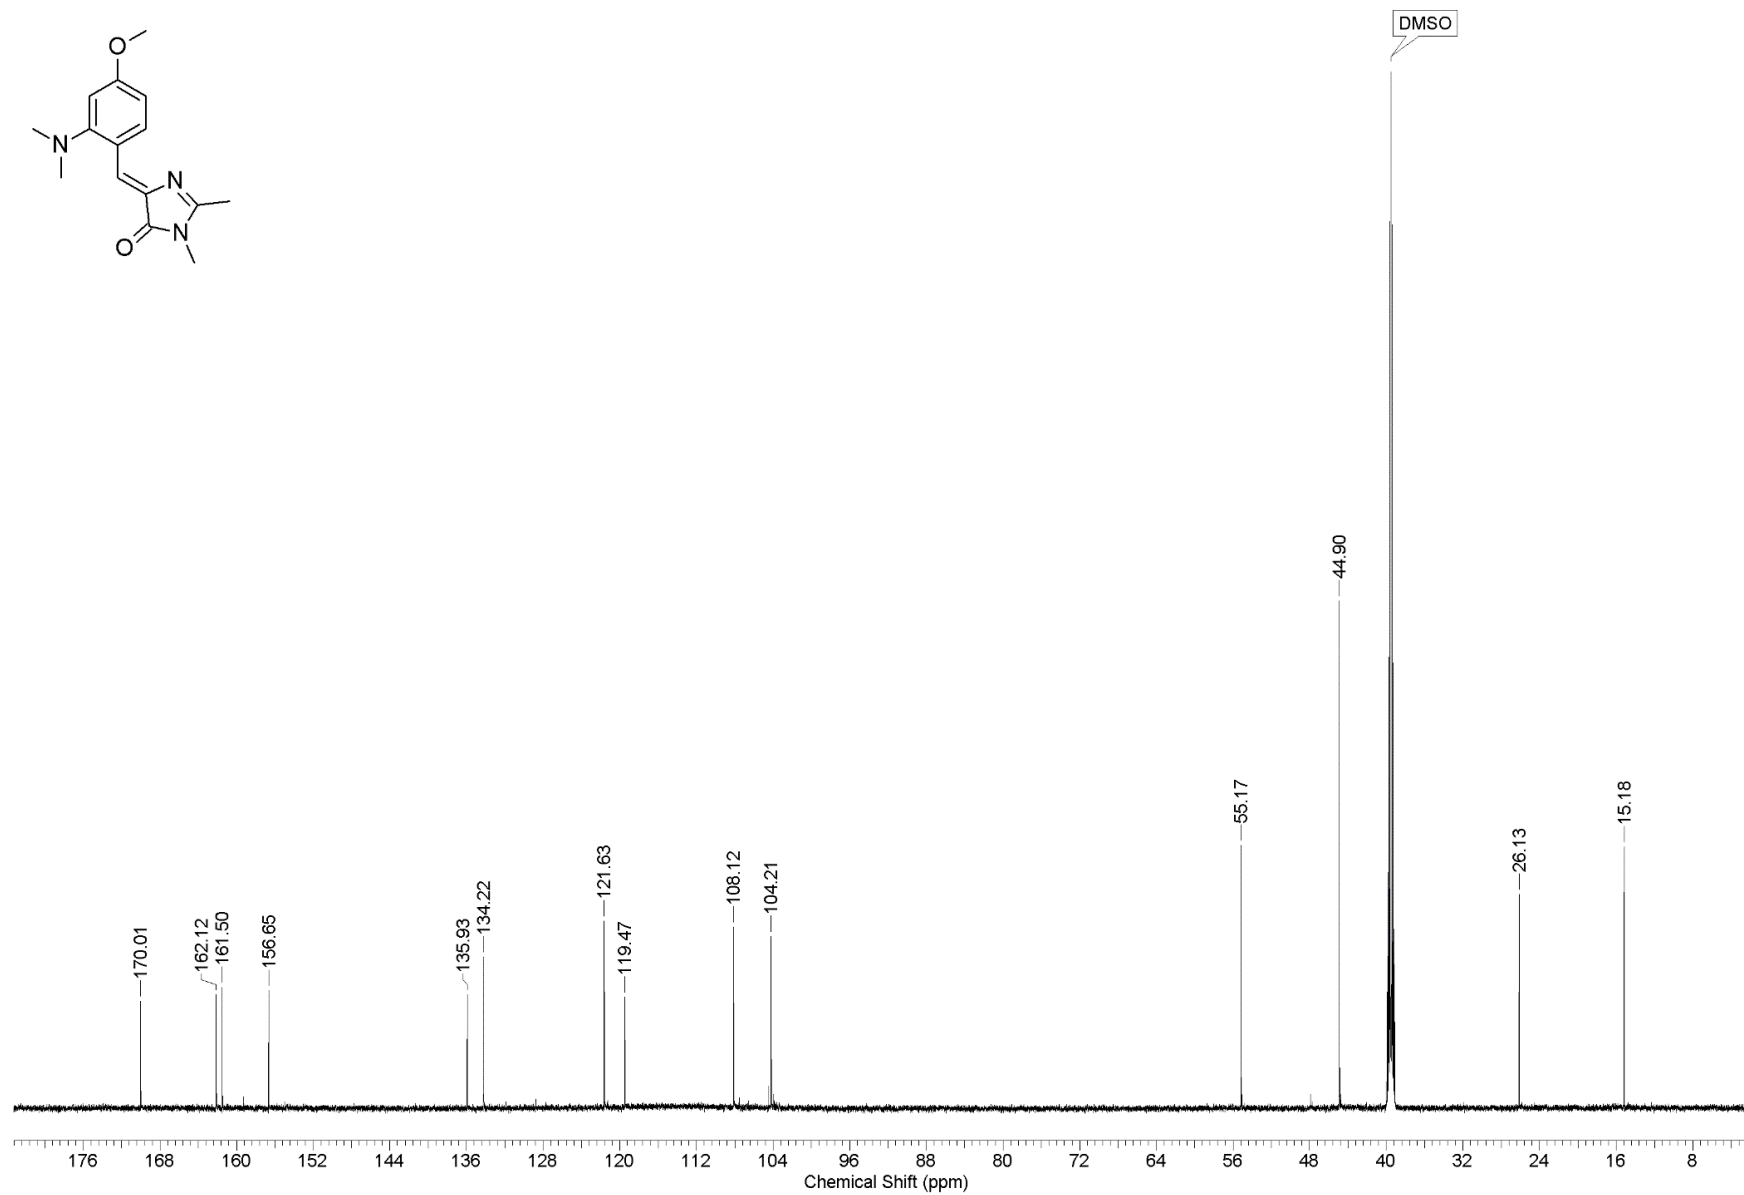

S64



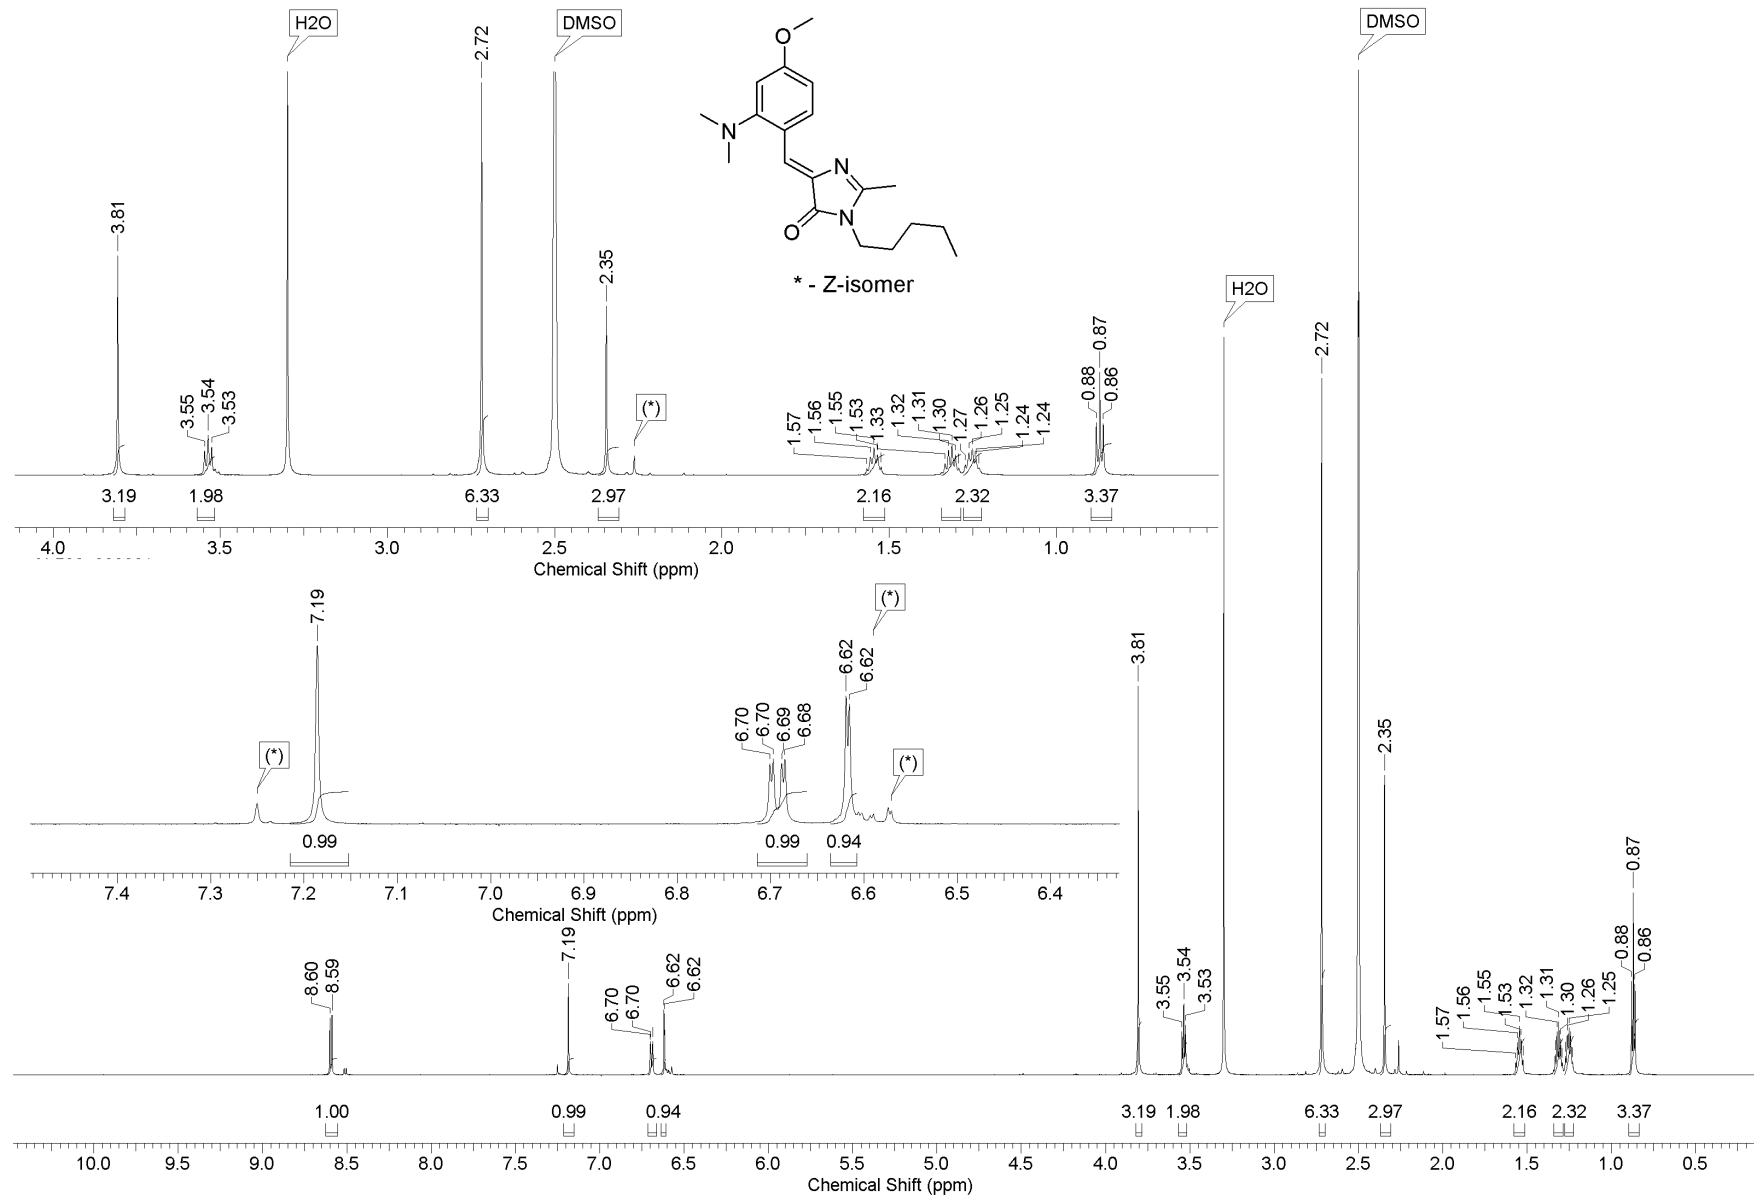

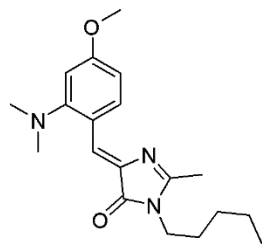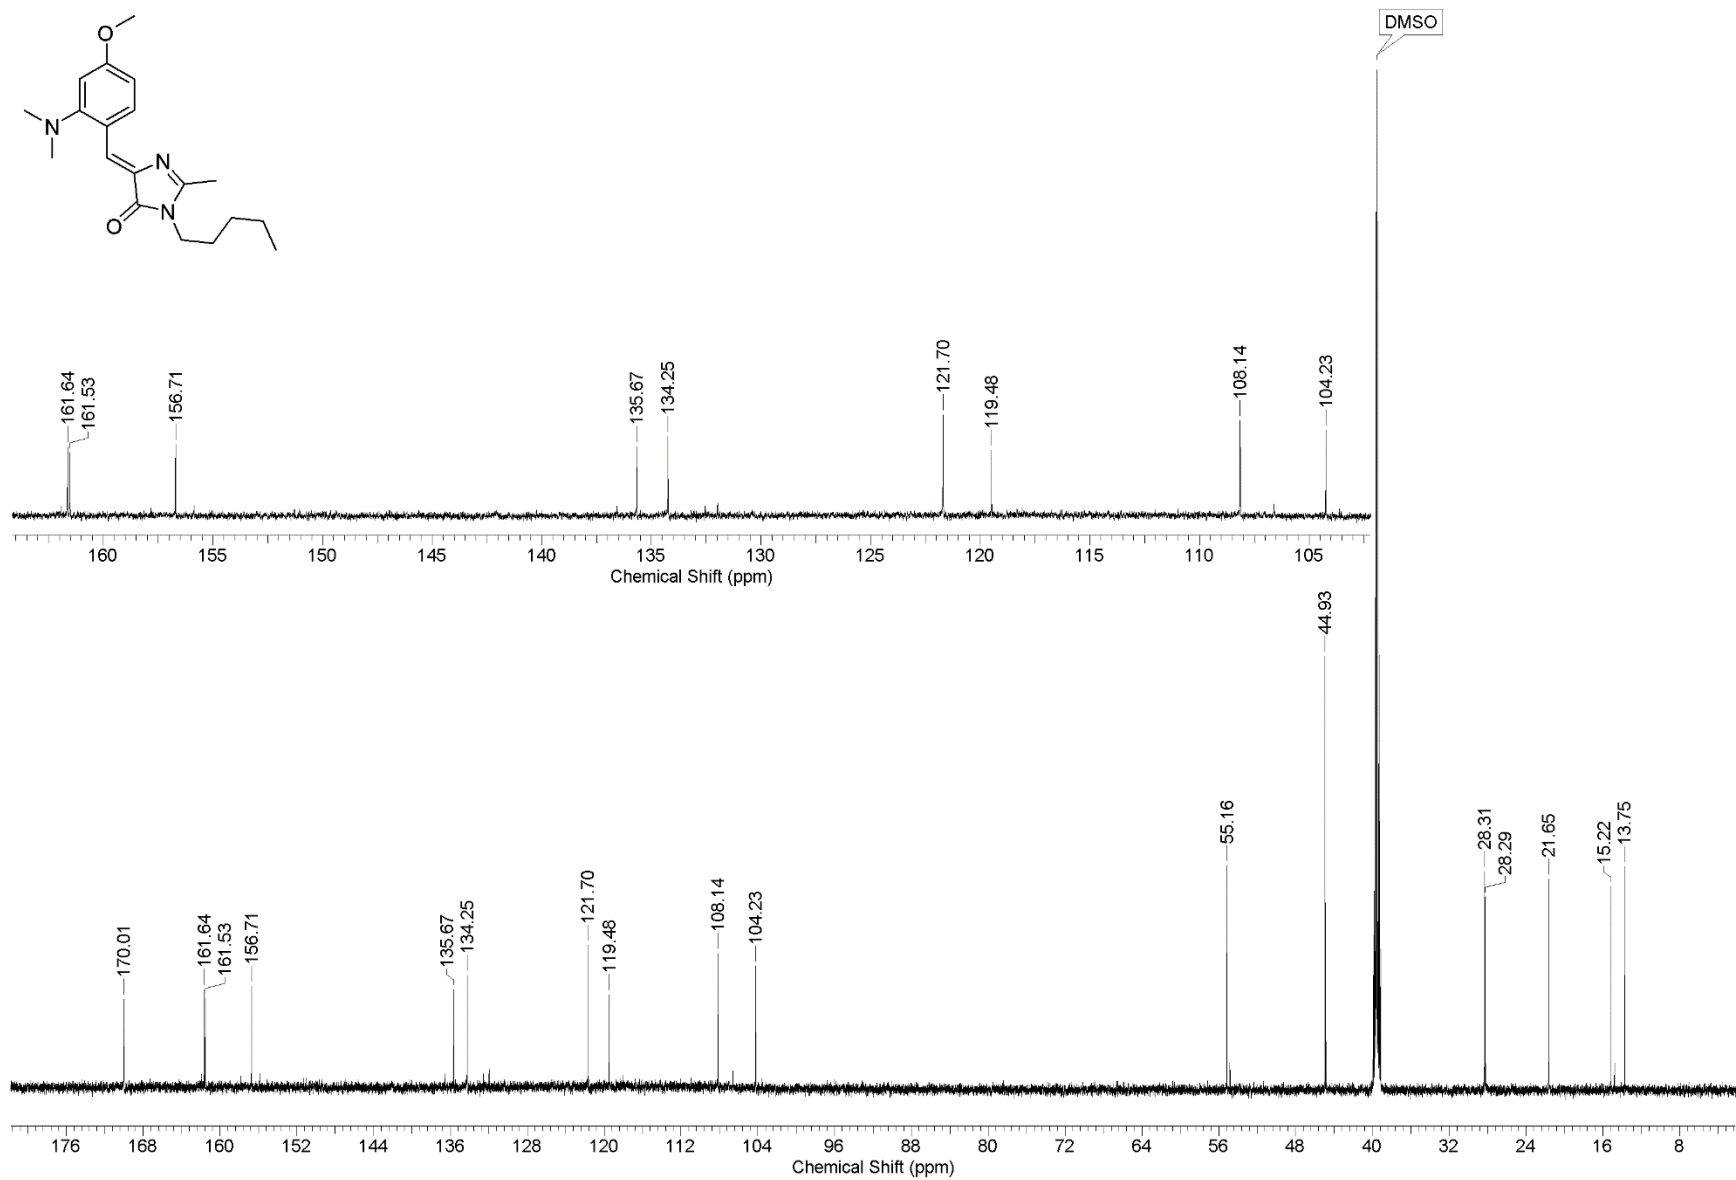

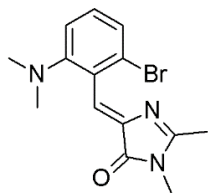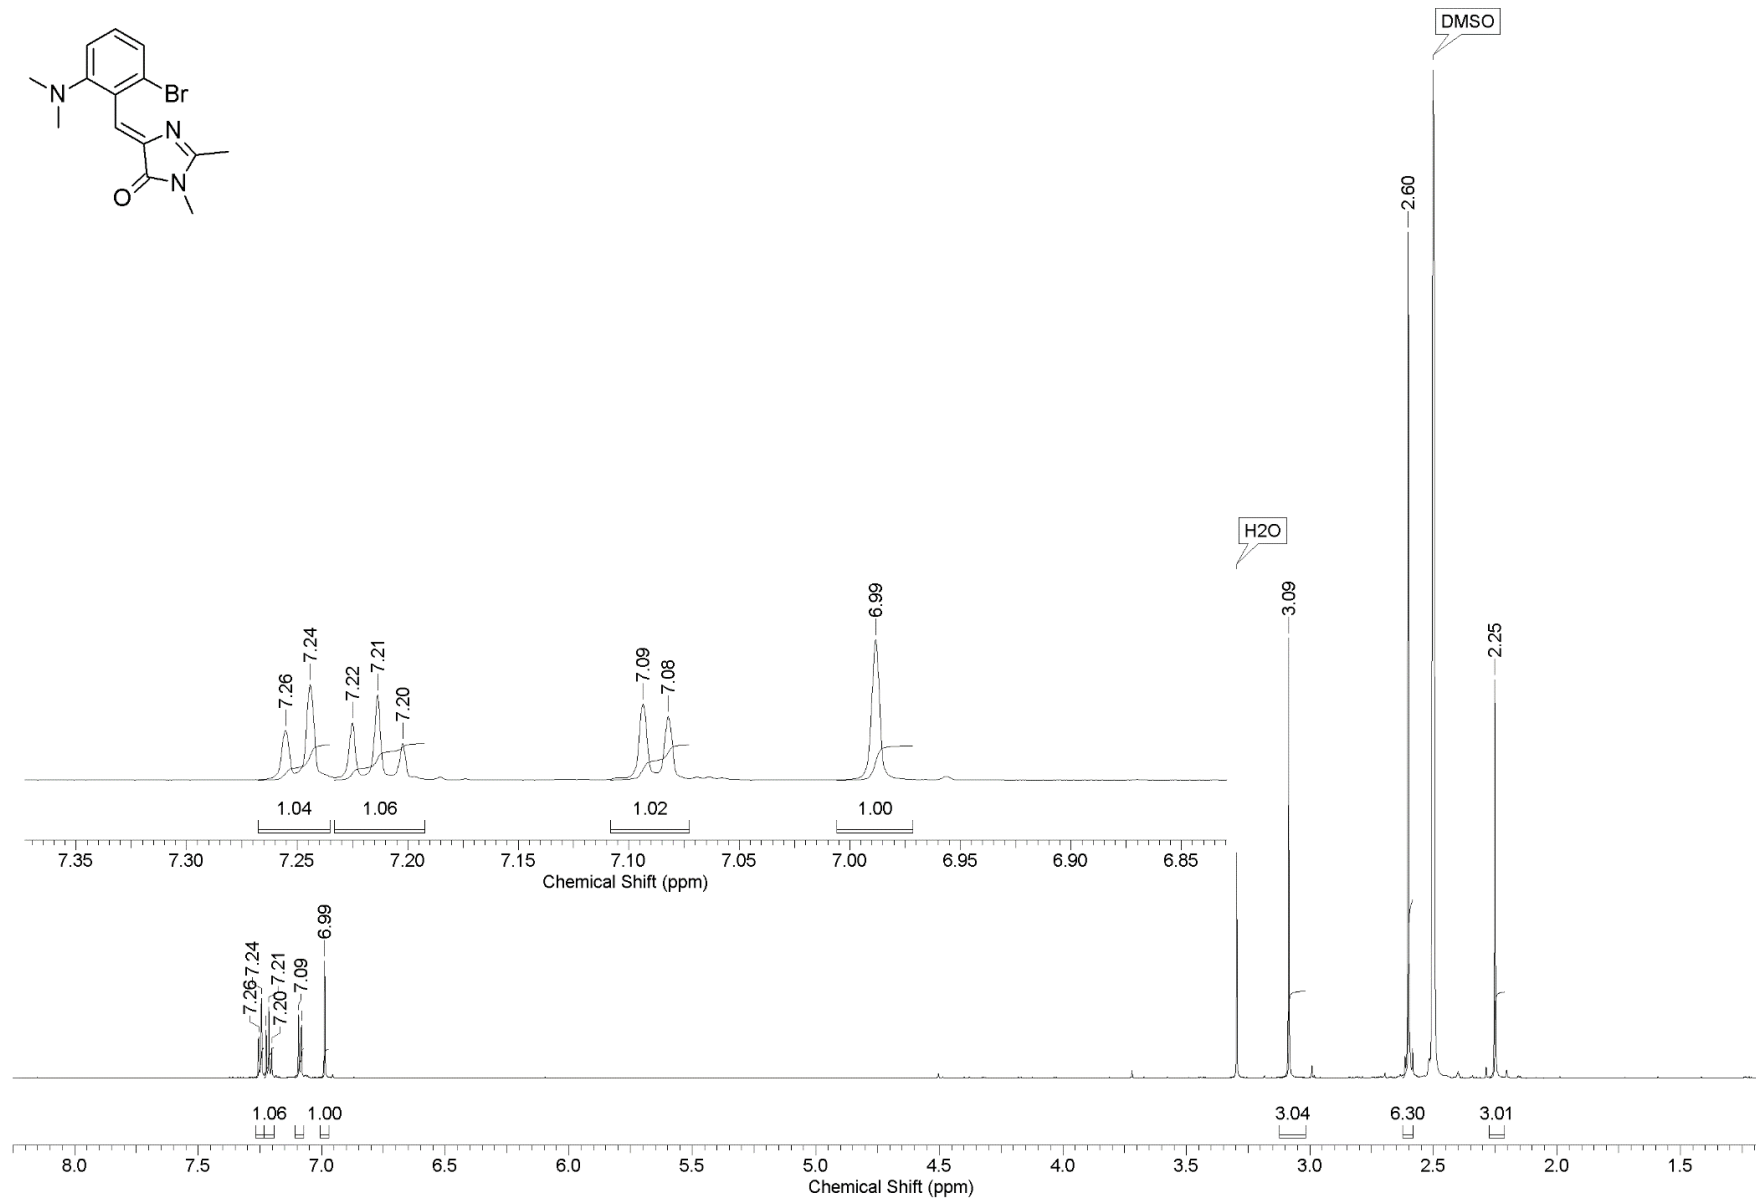

S67

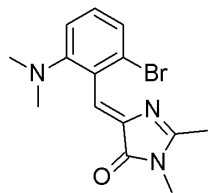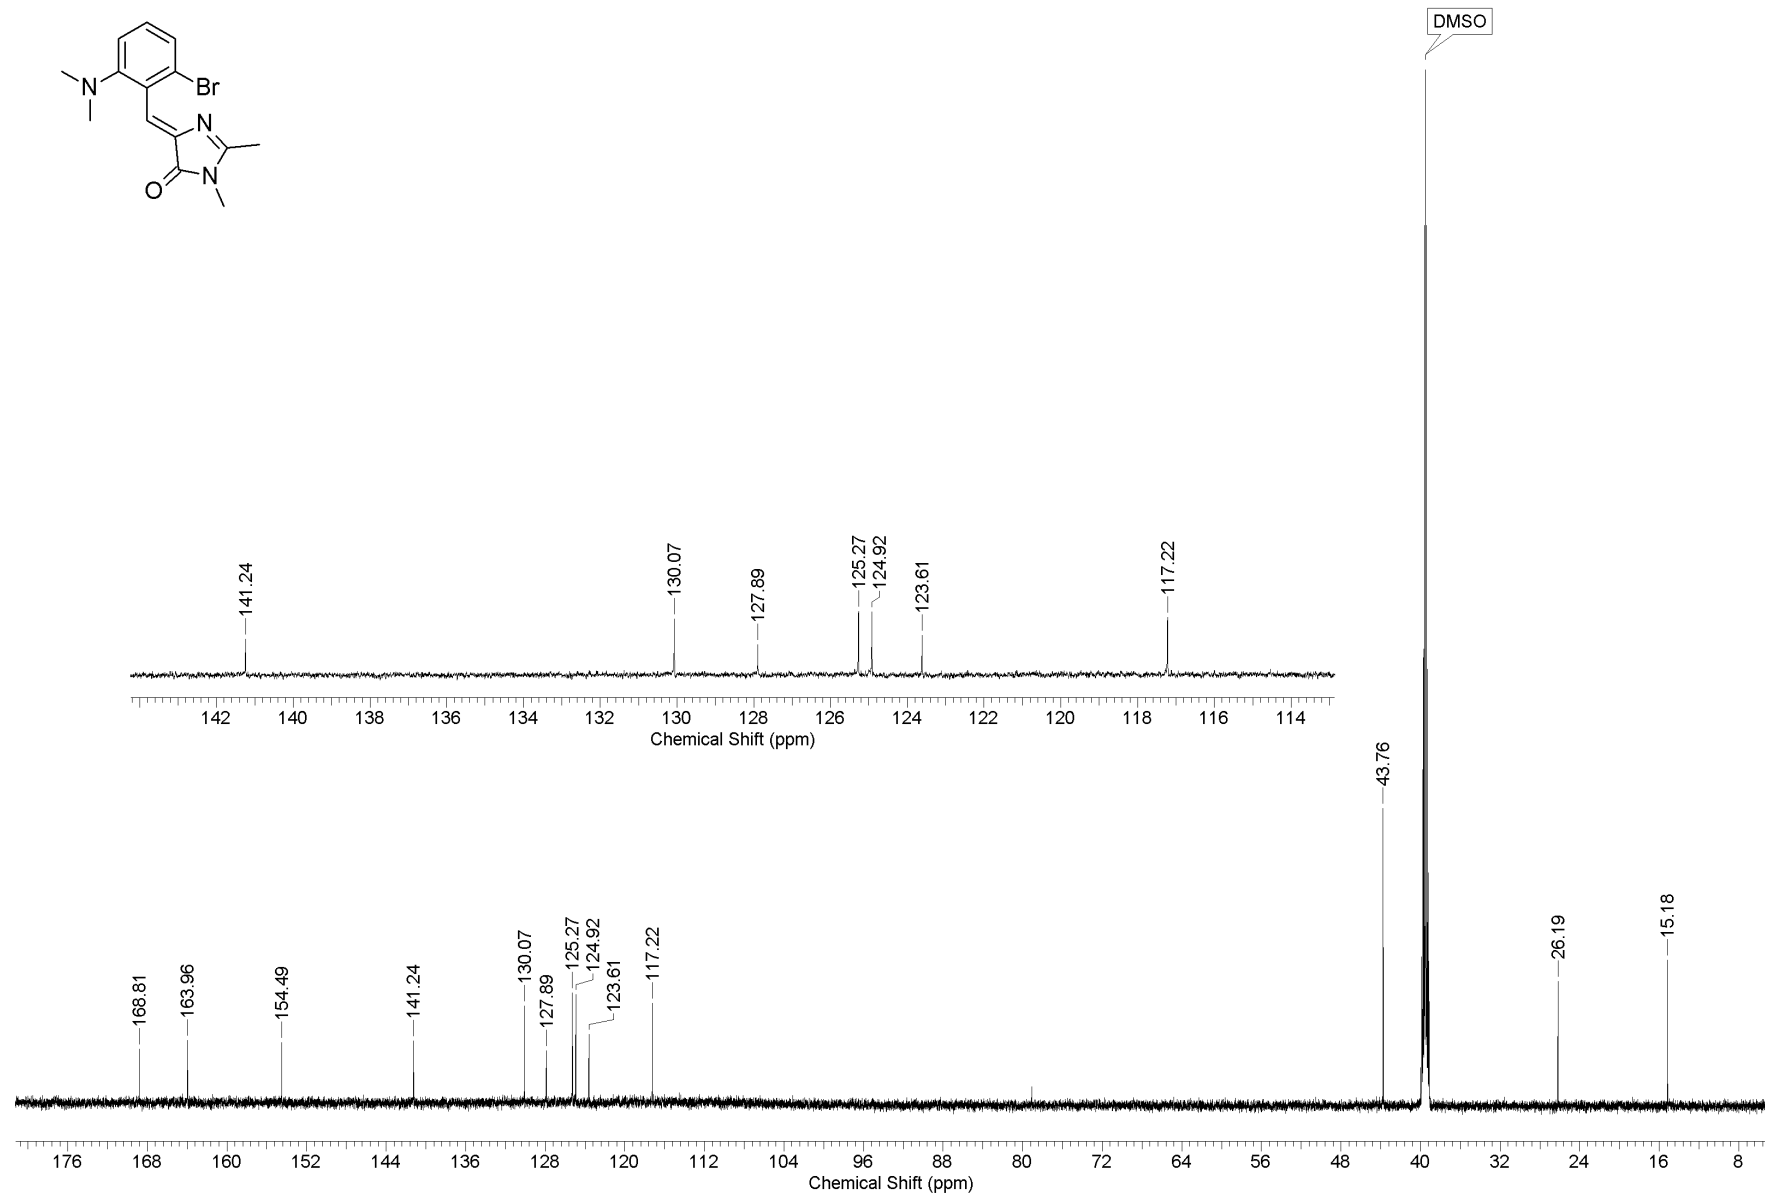

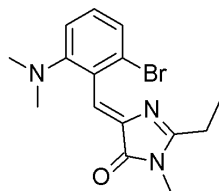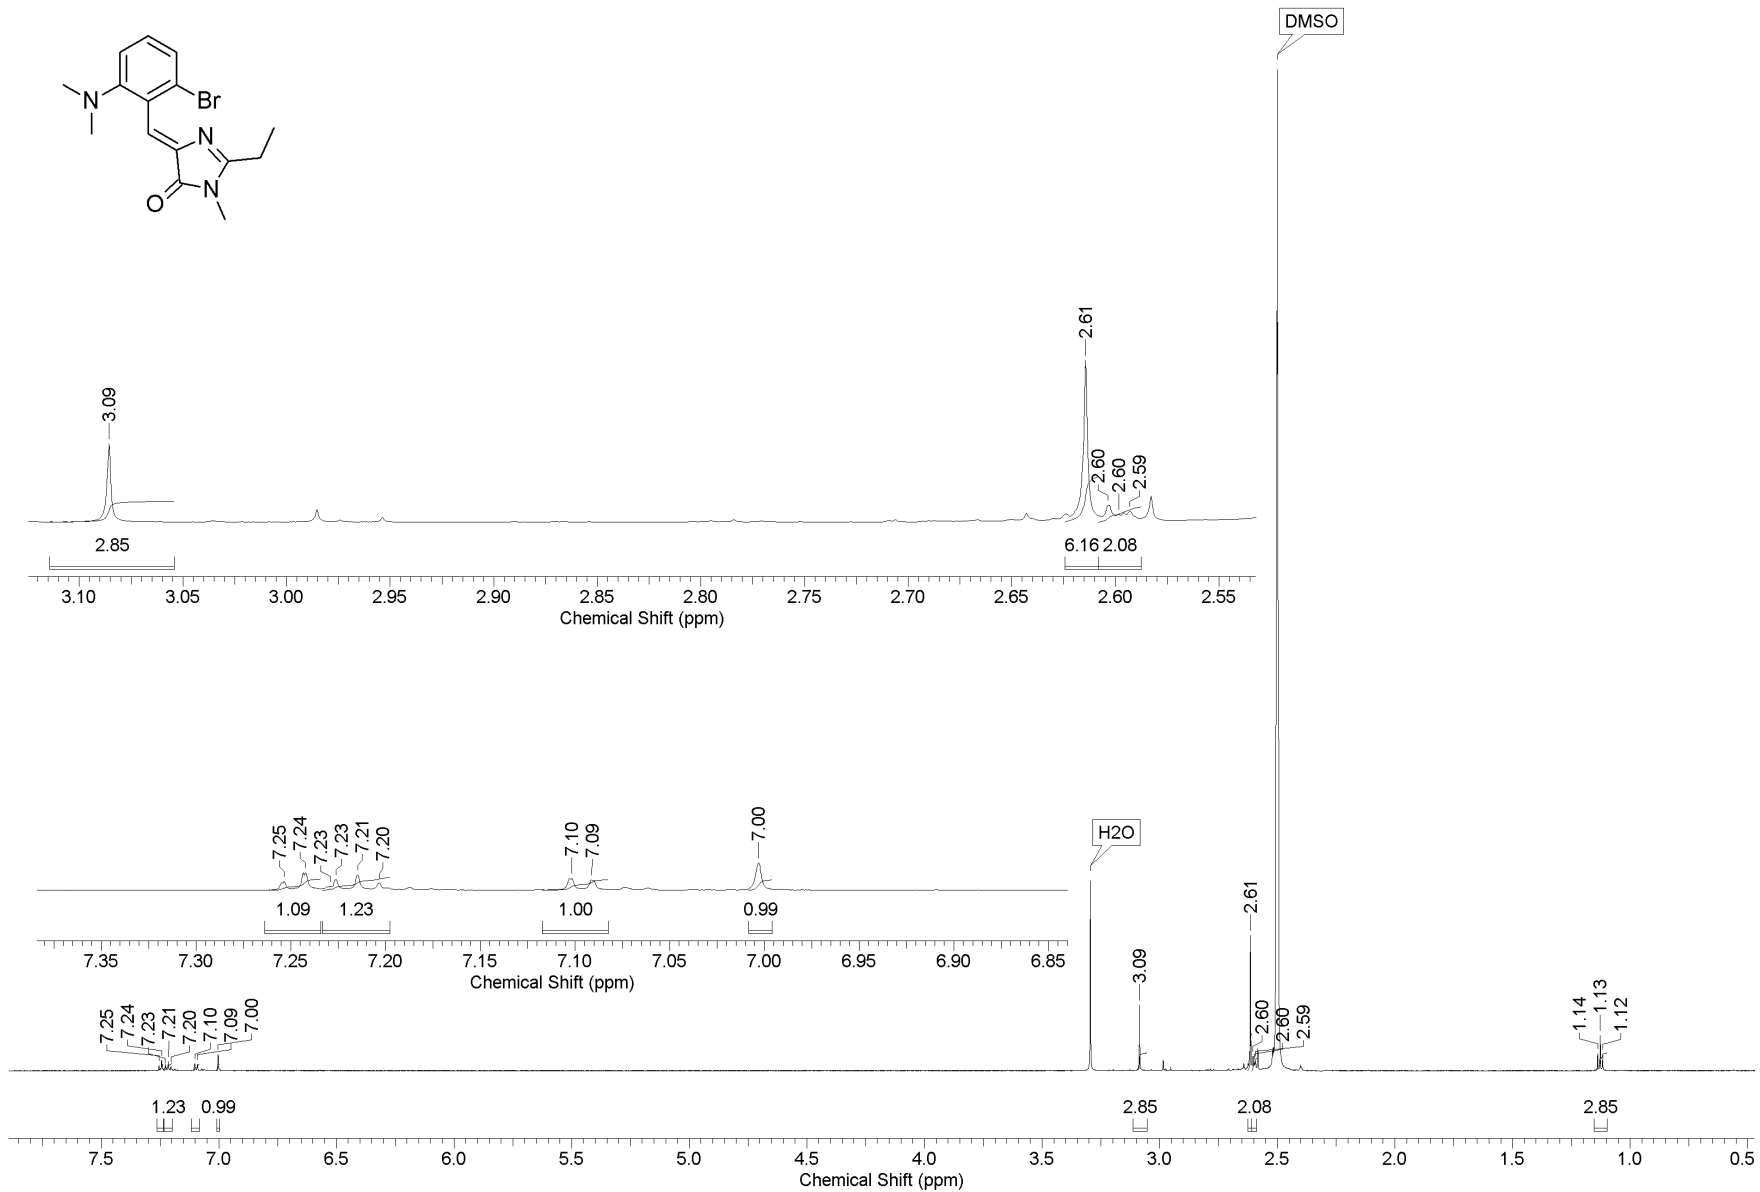

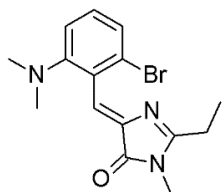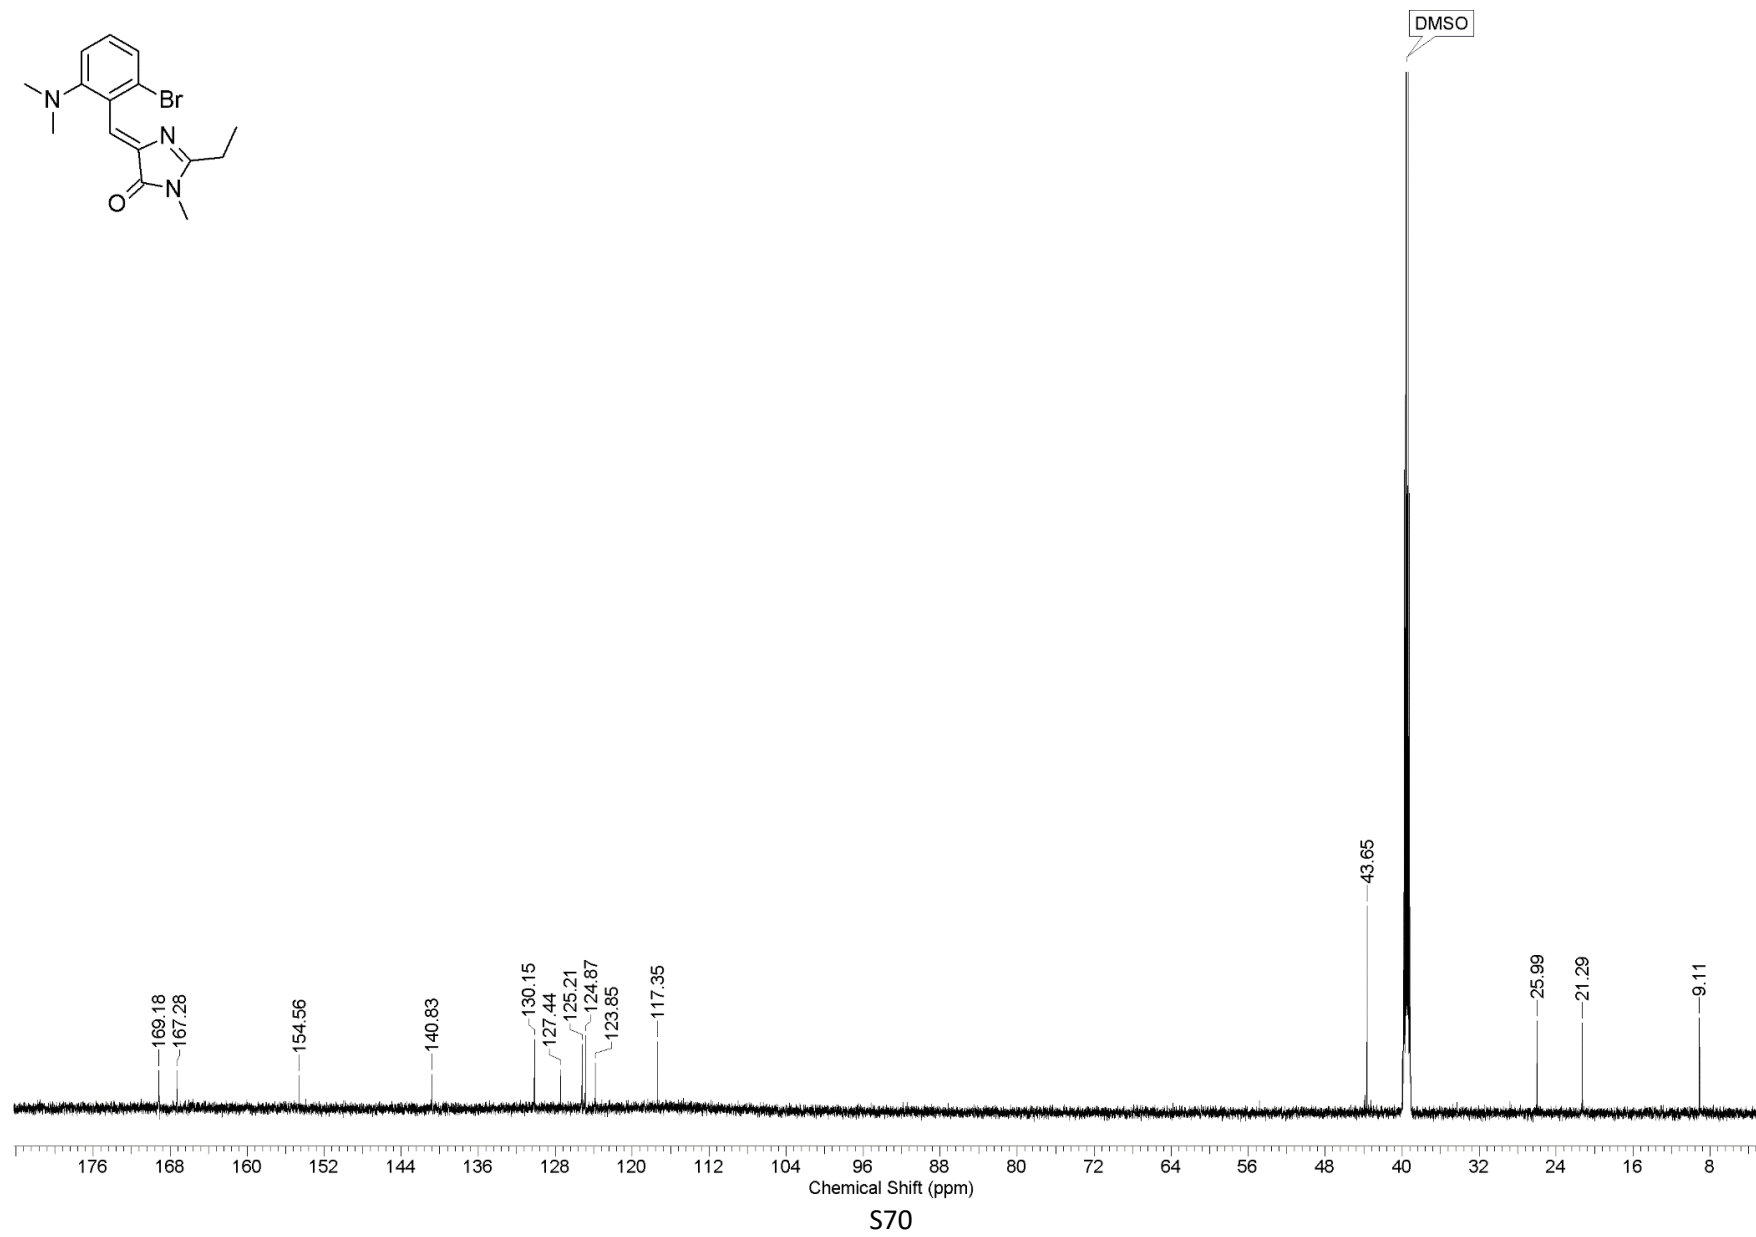

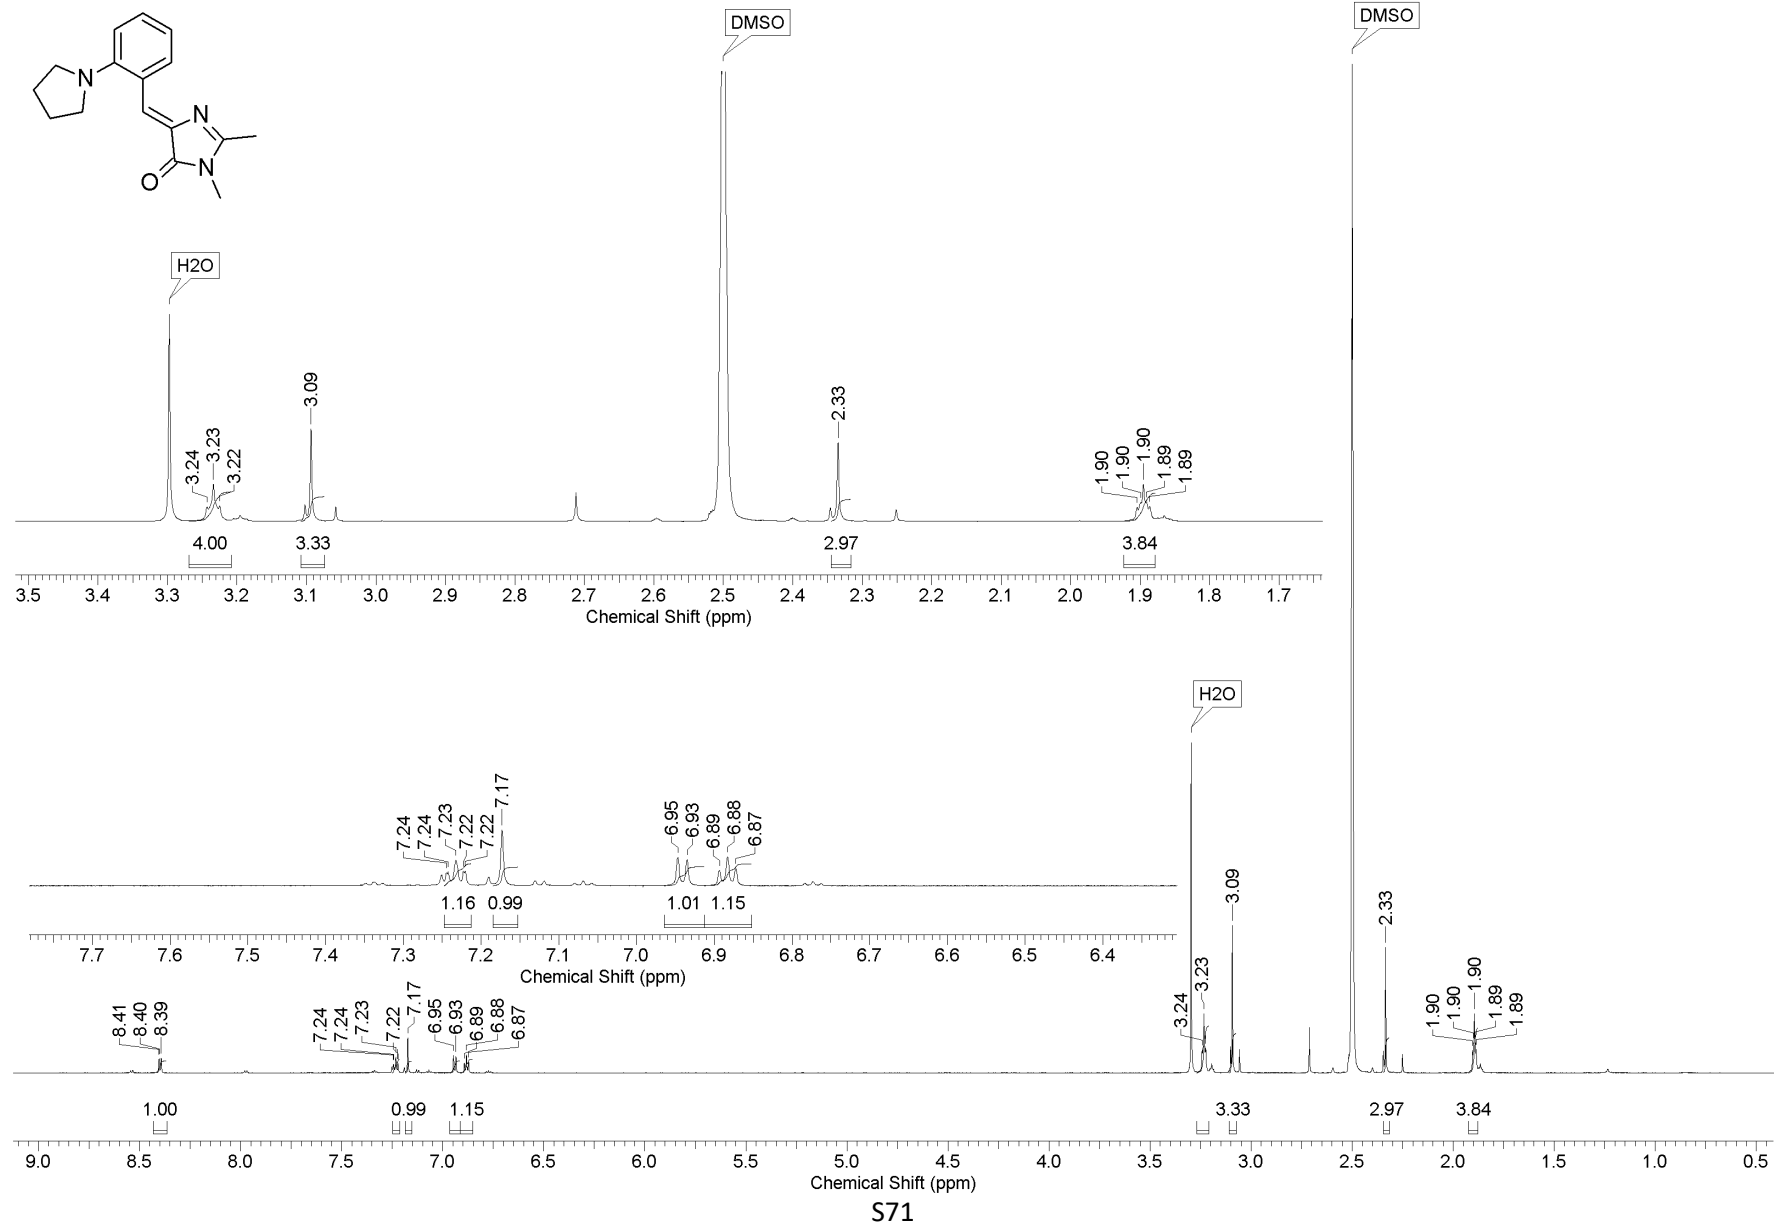

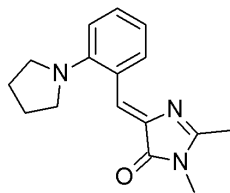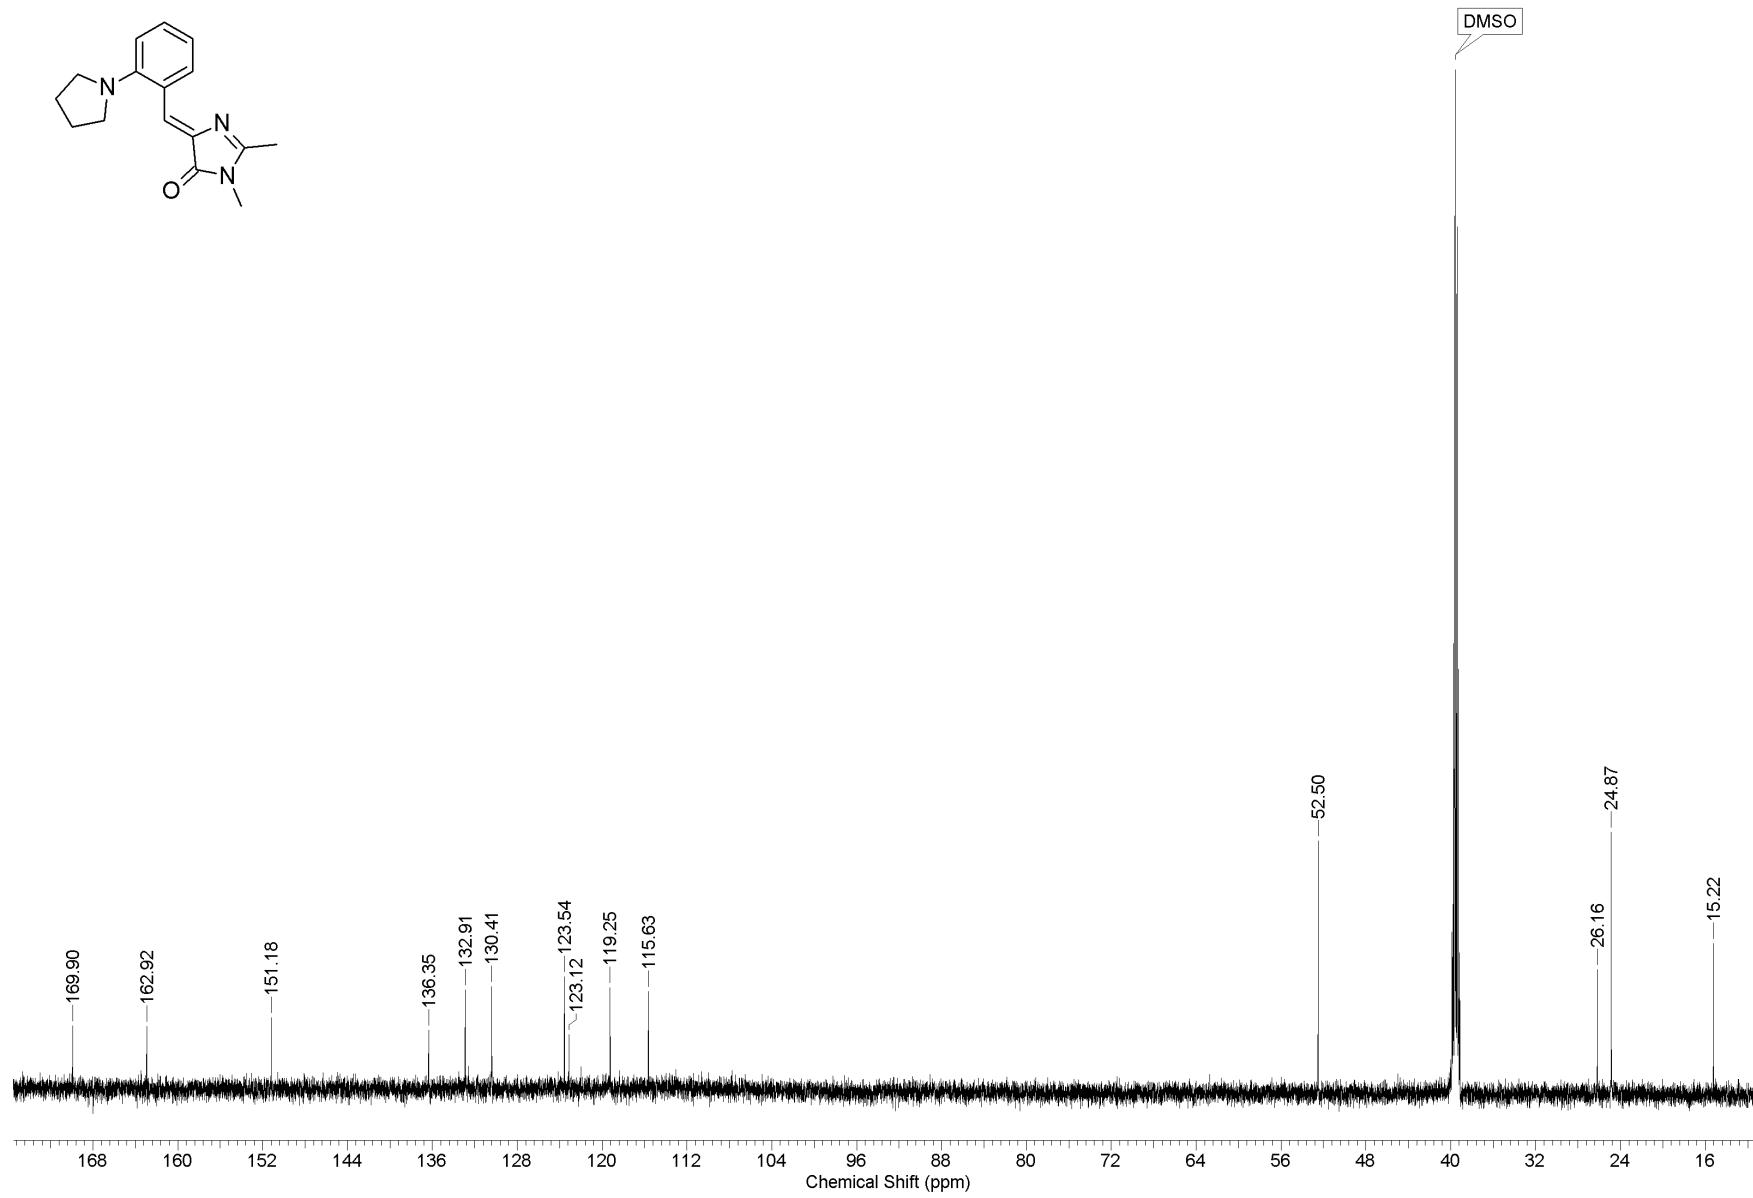



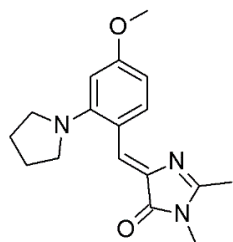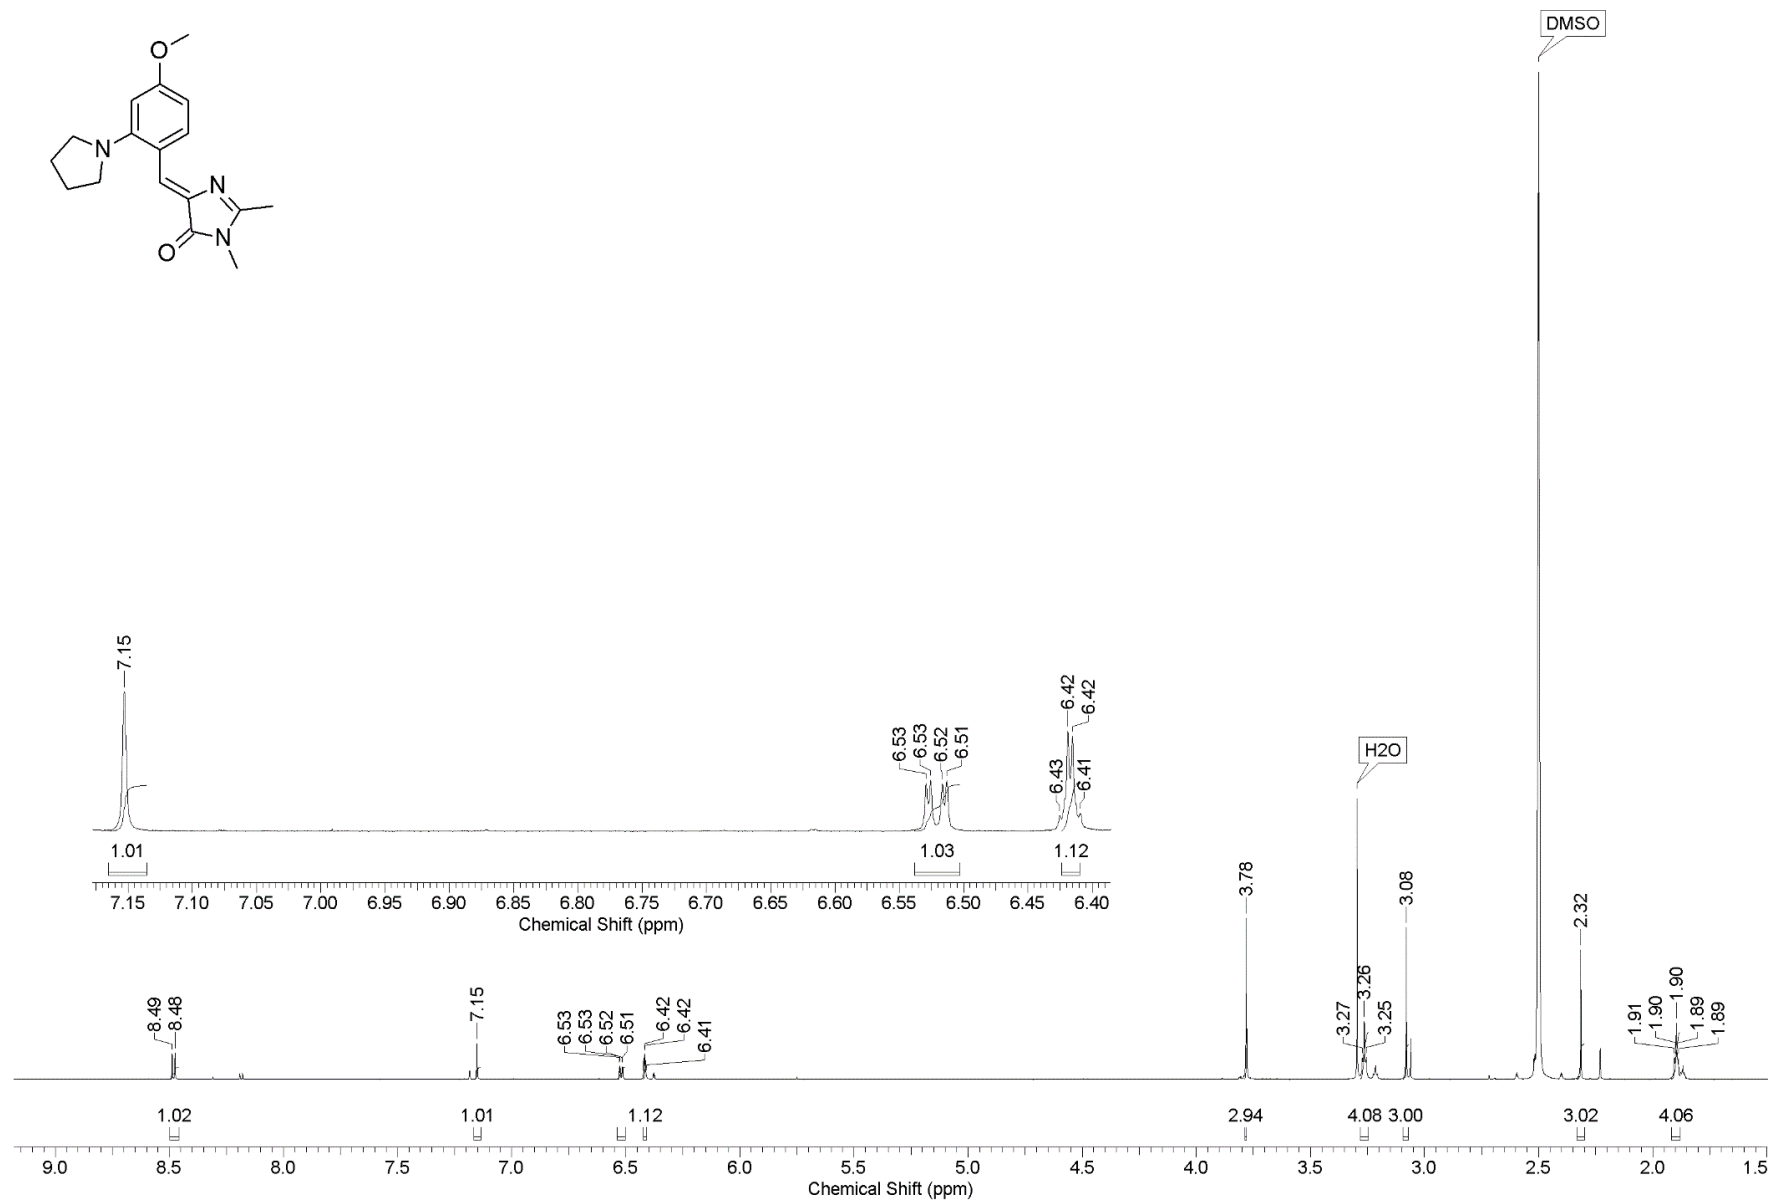

S73

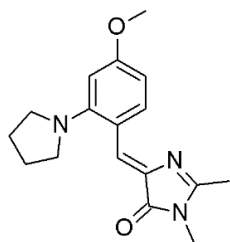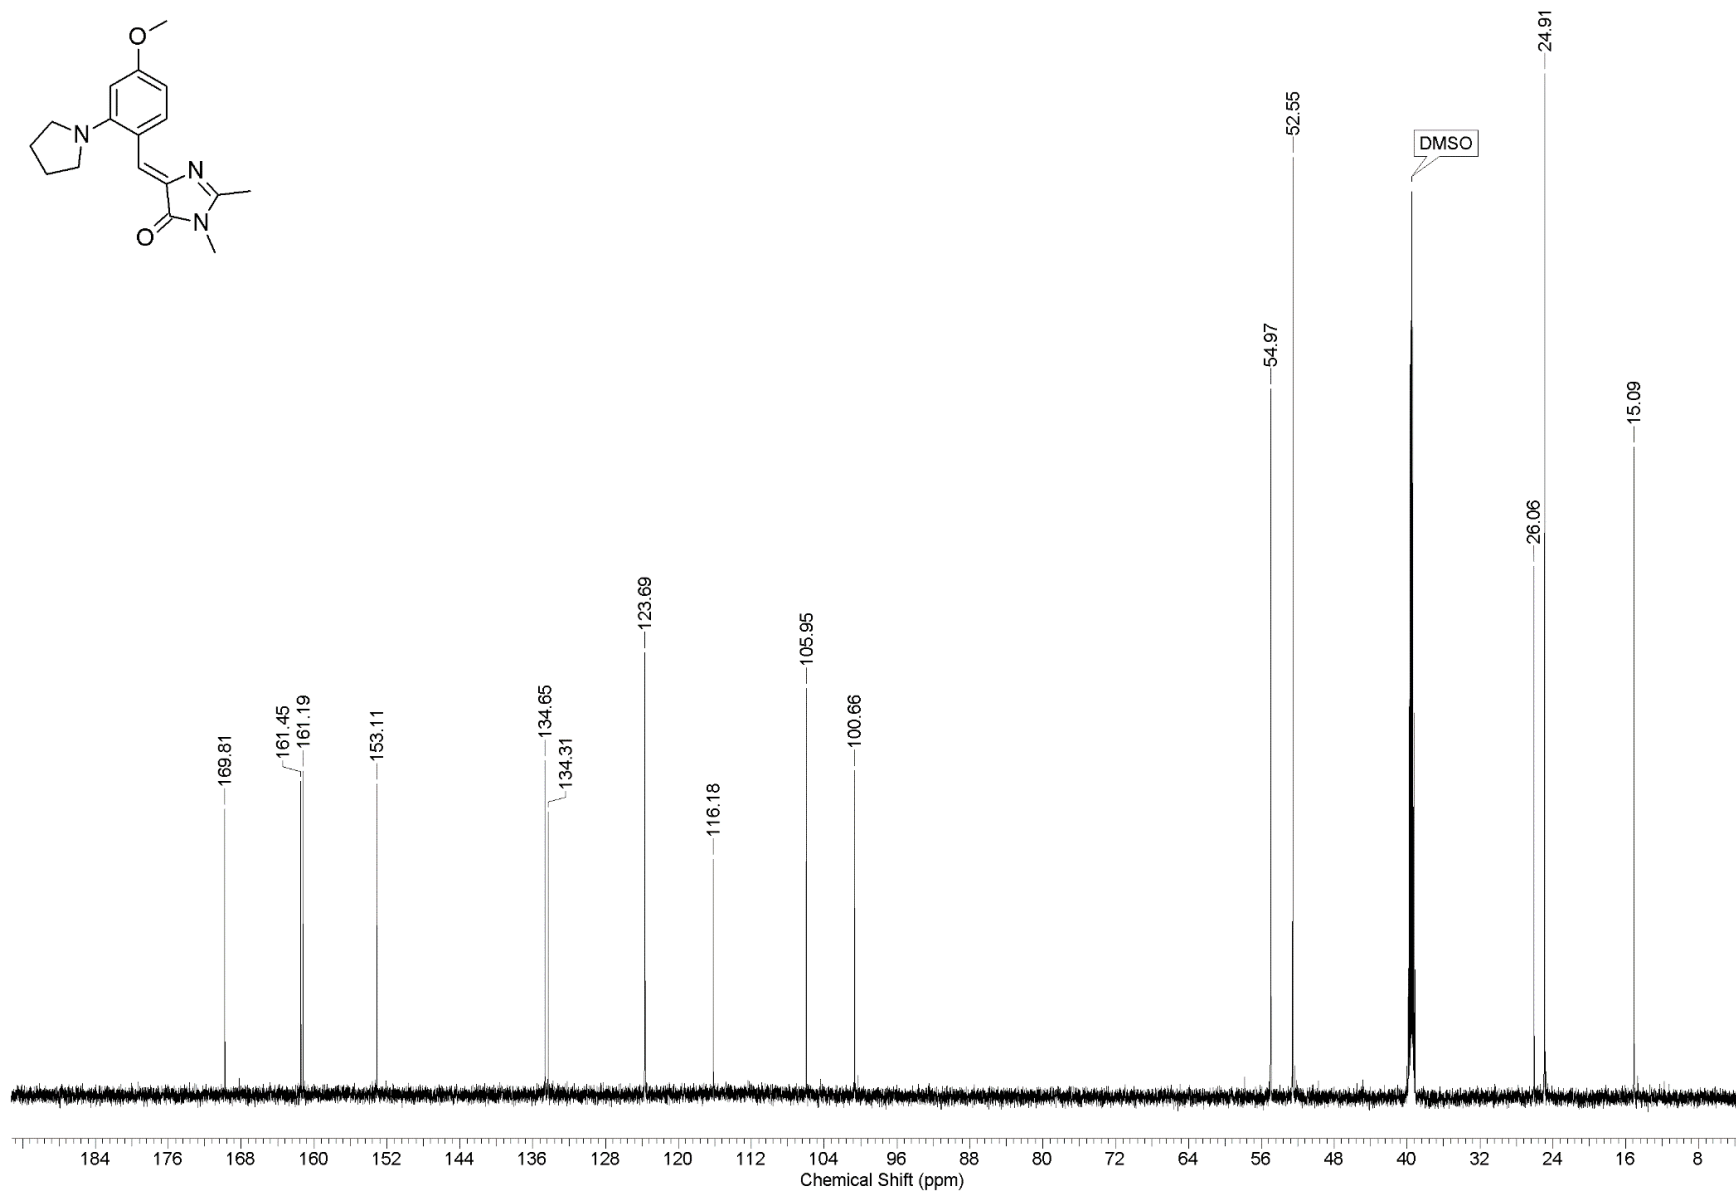

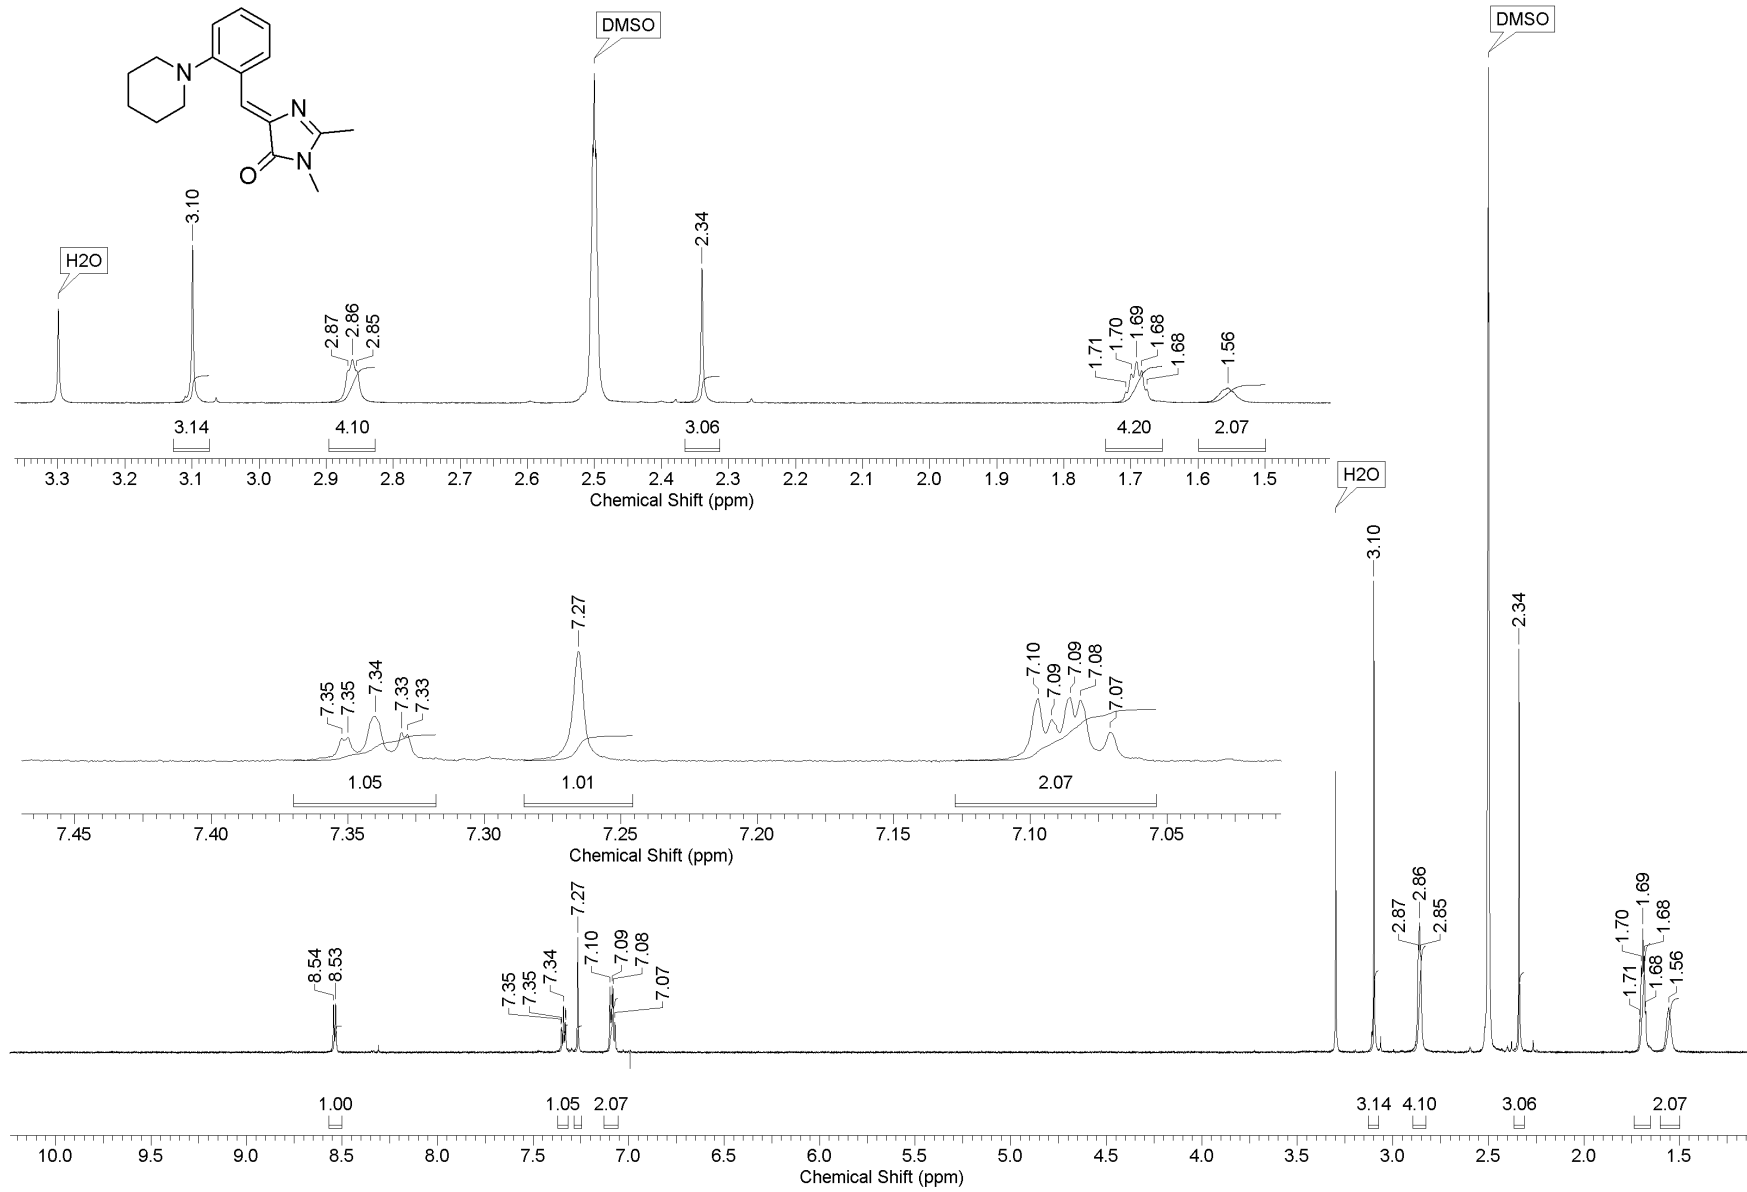

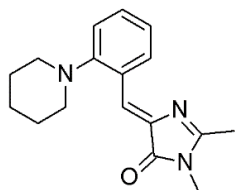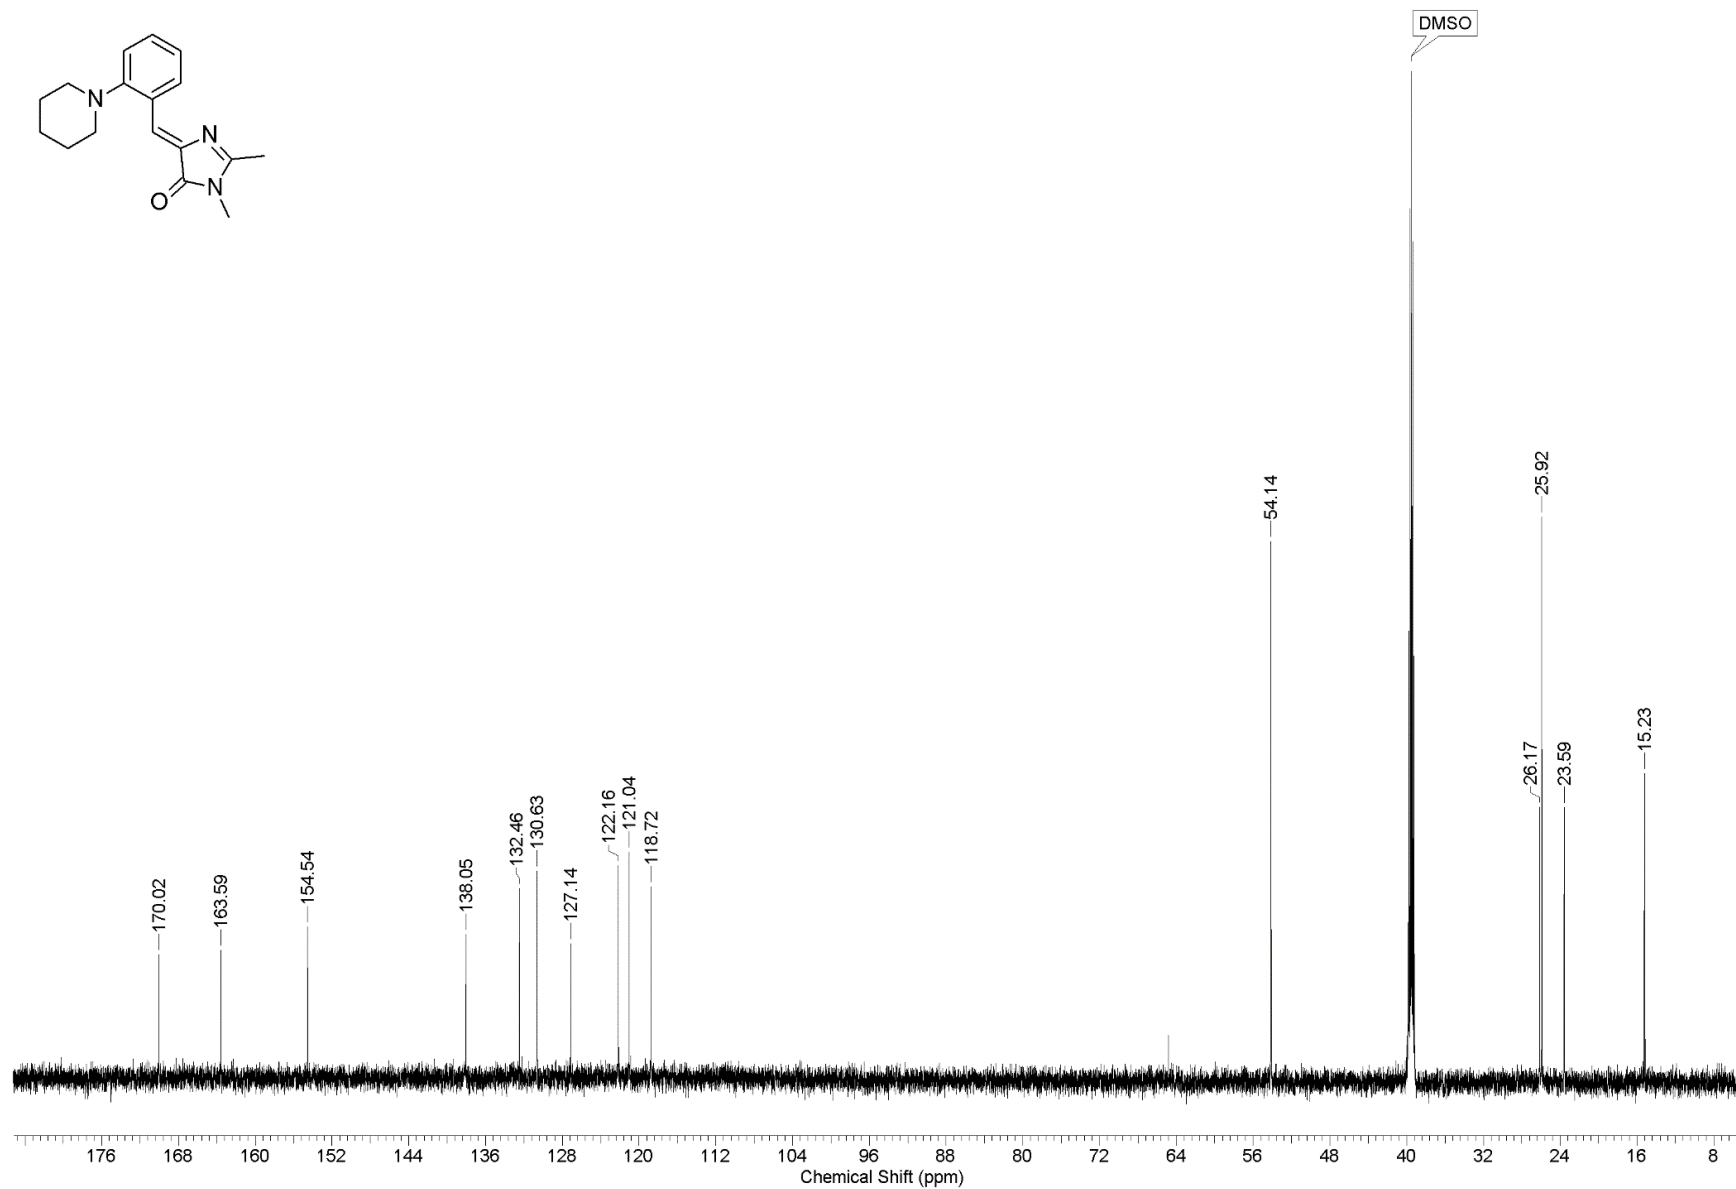

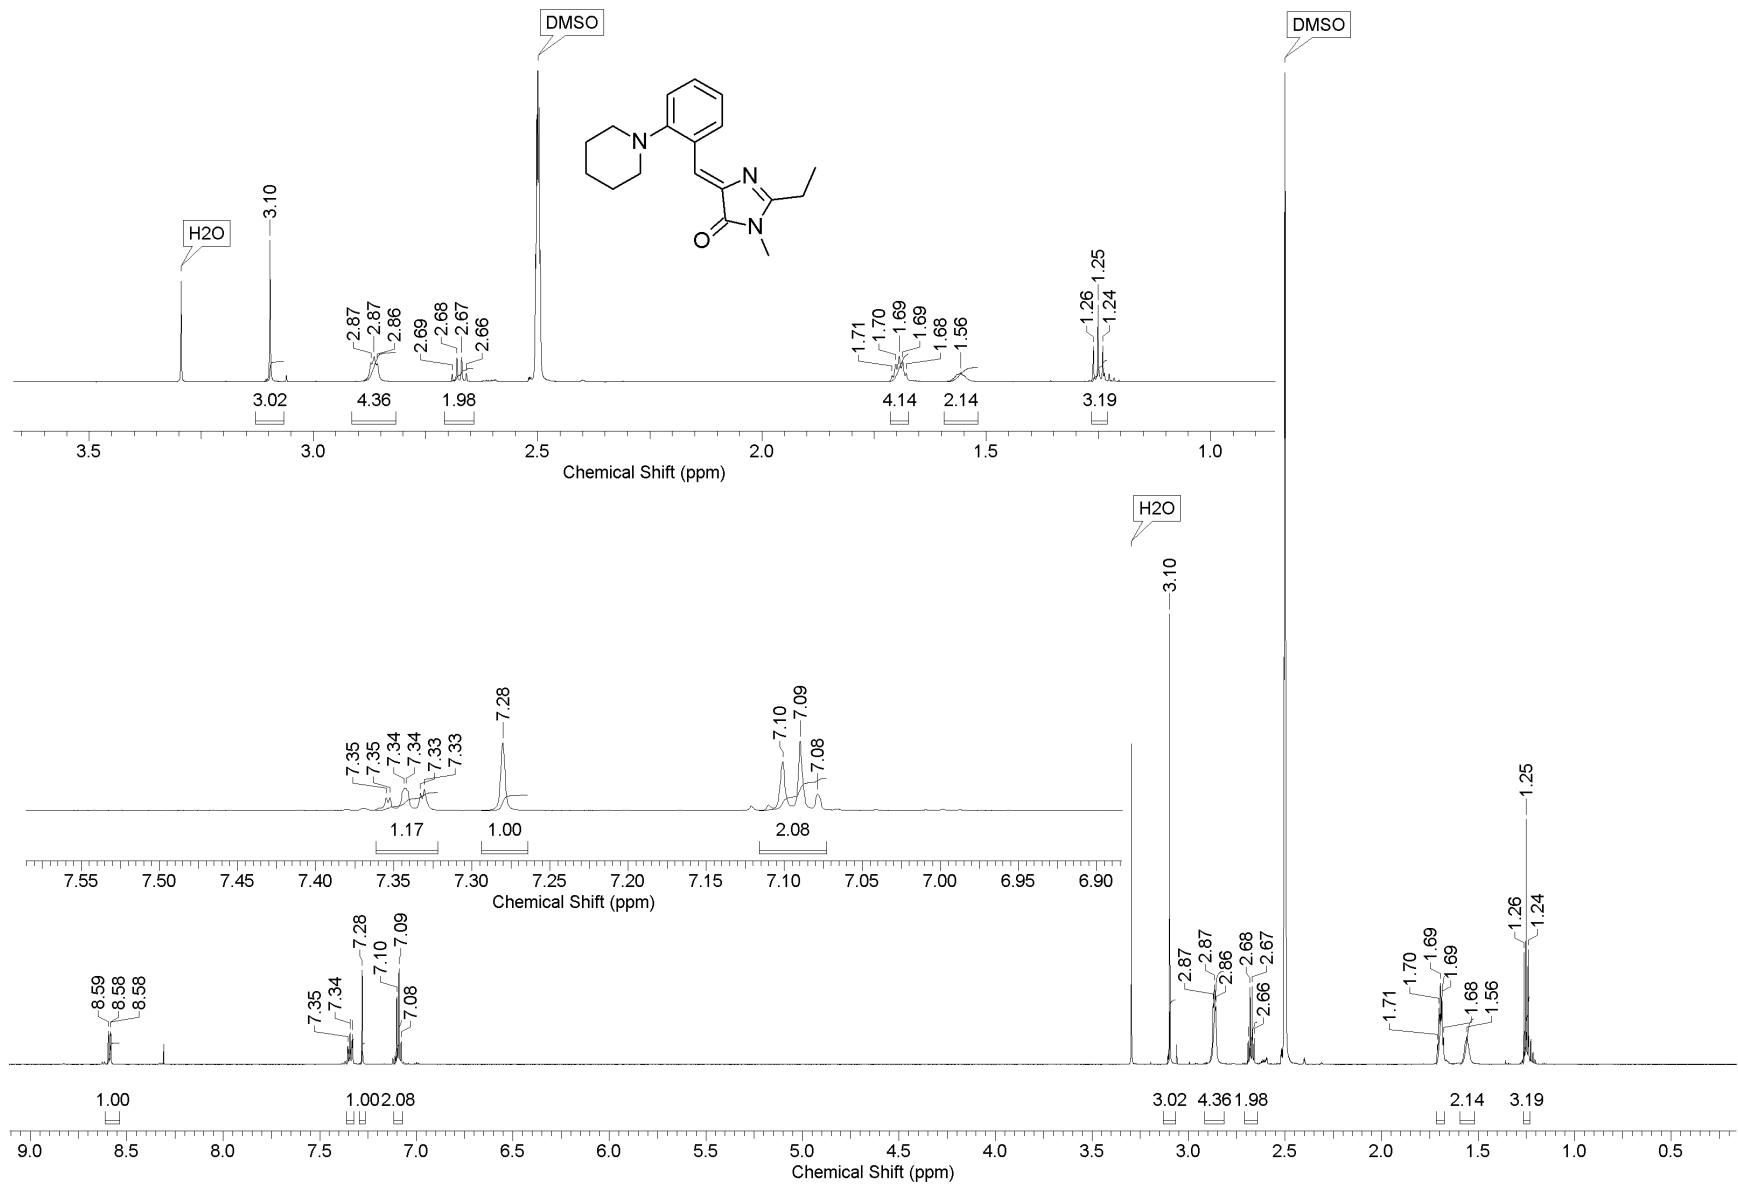

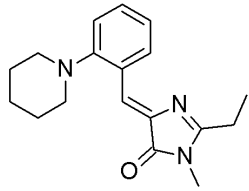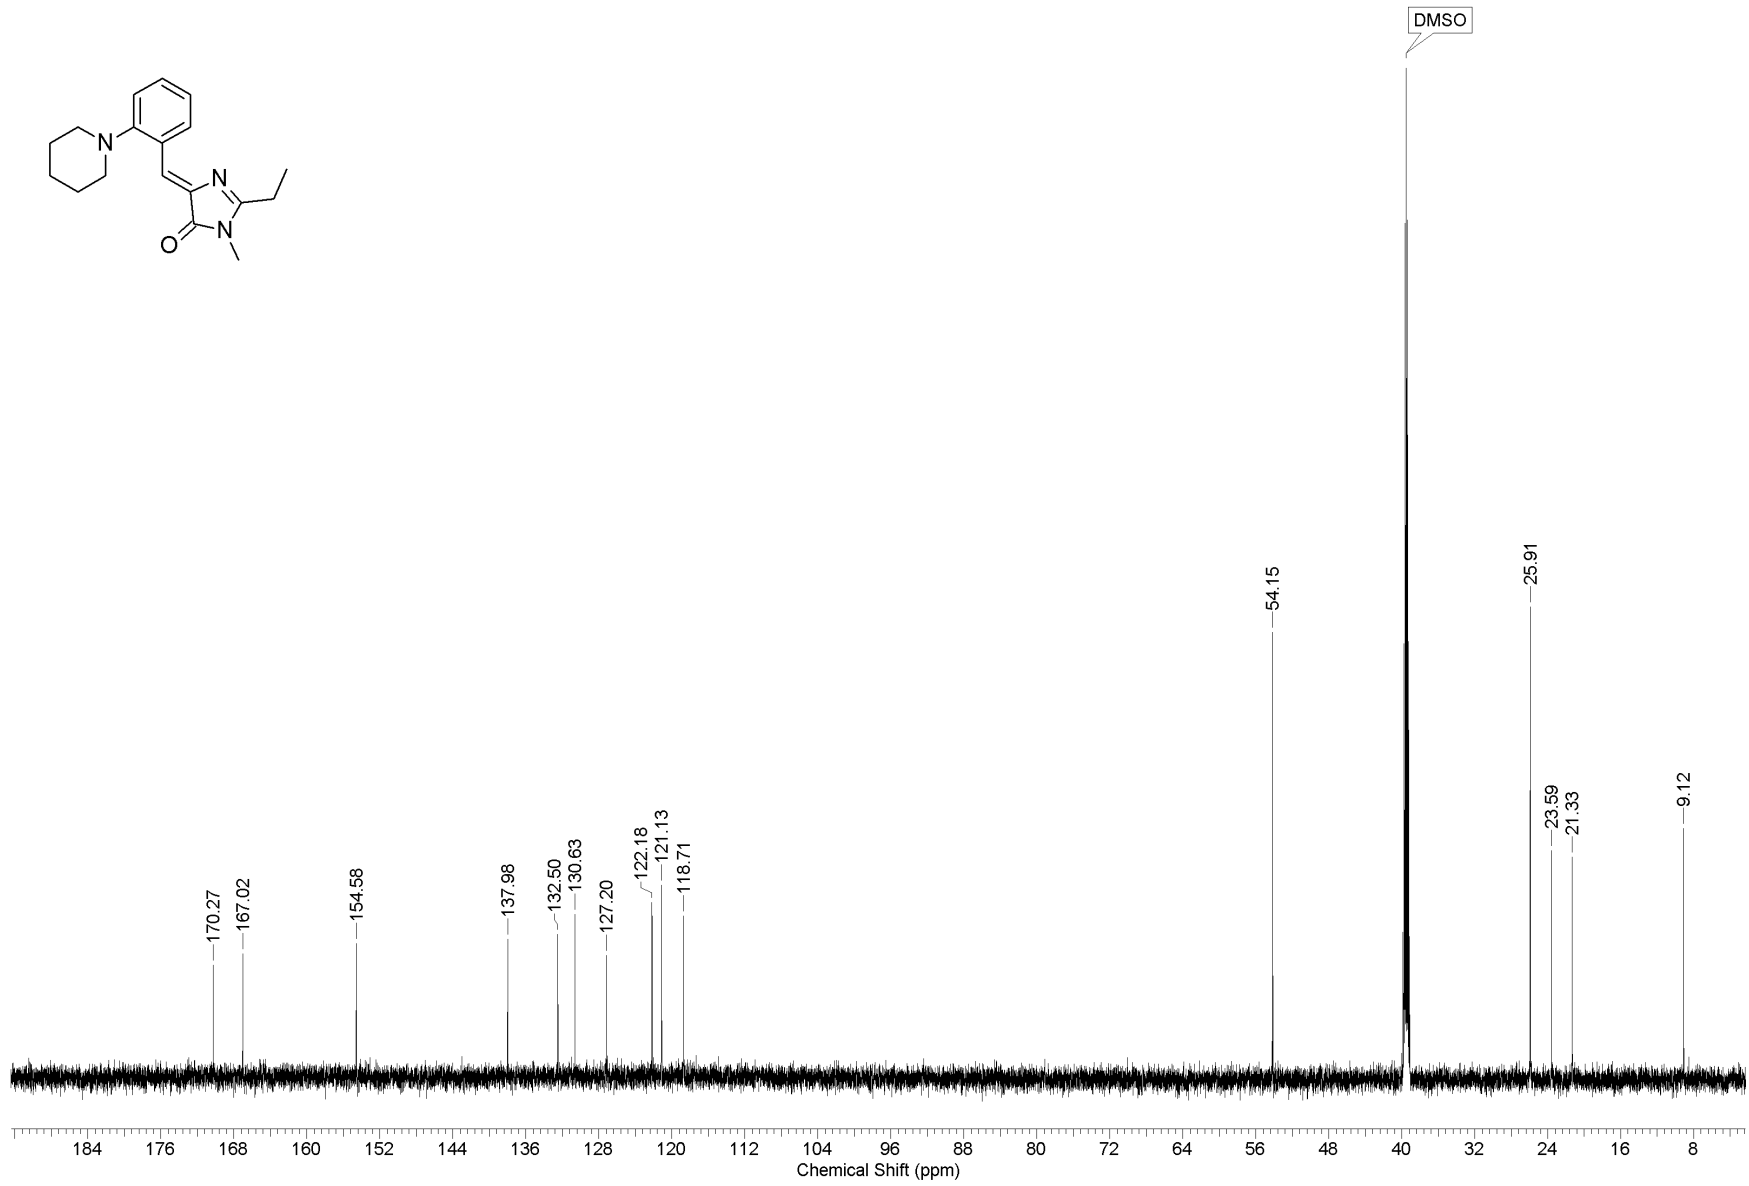

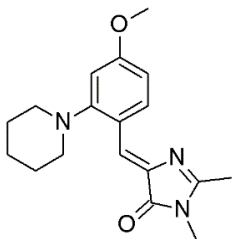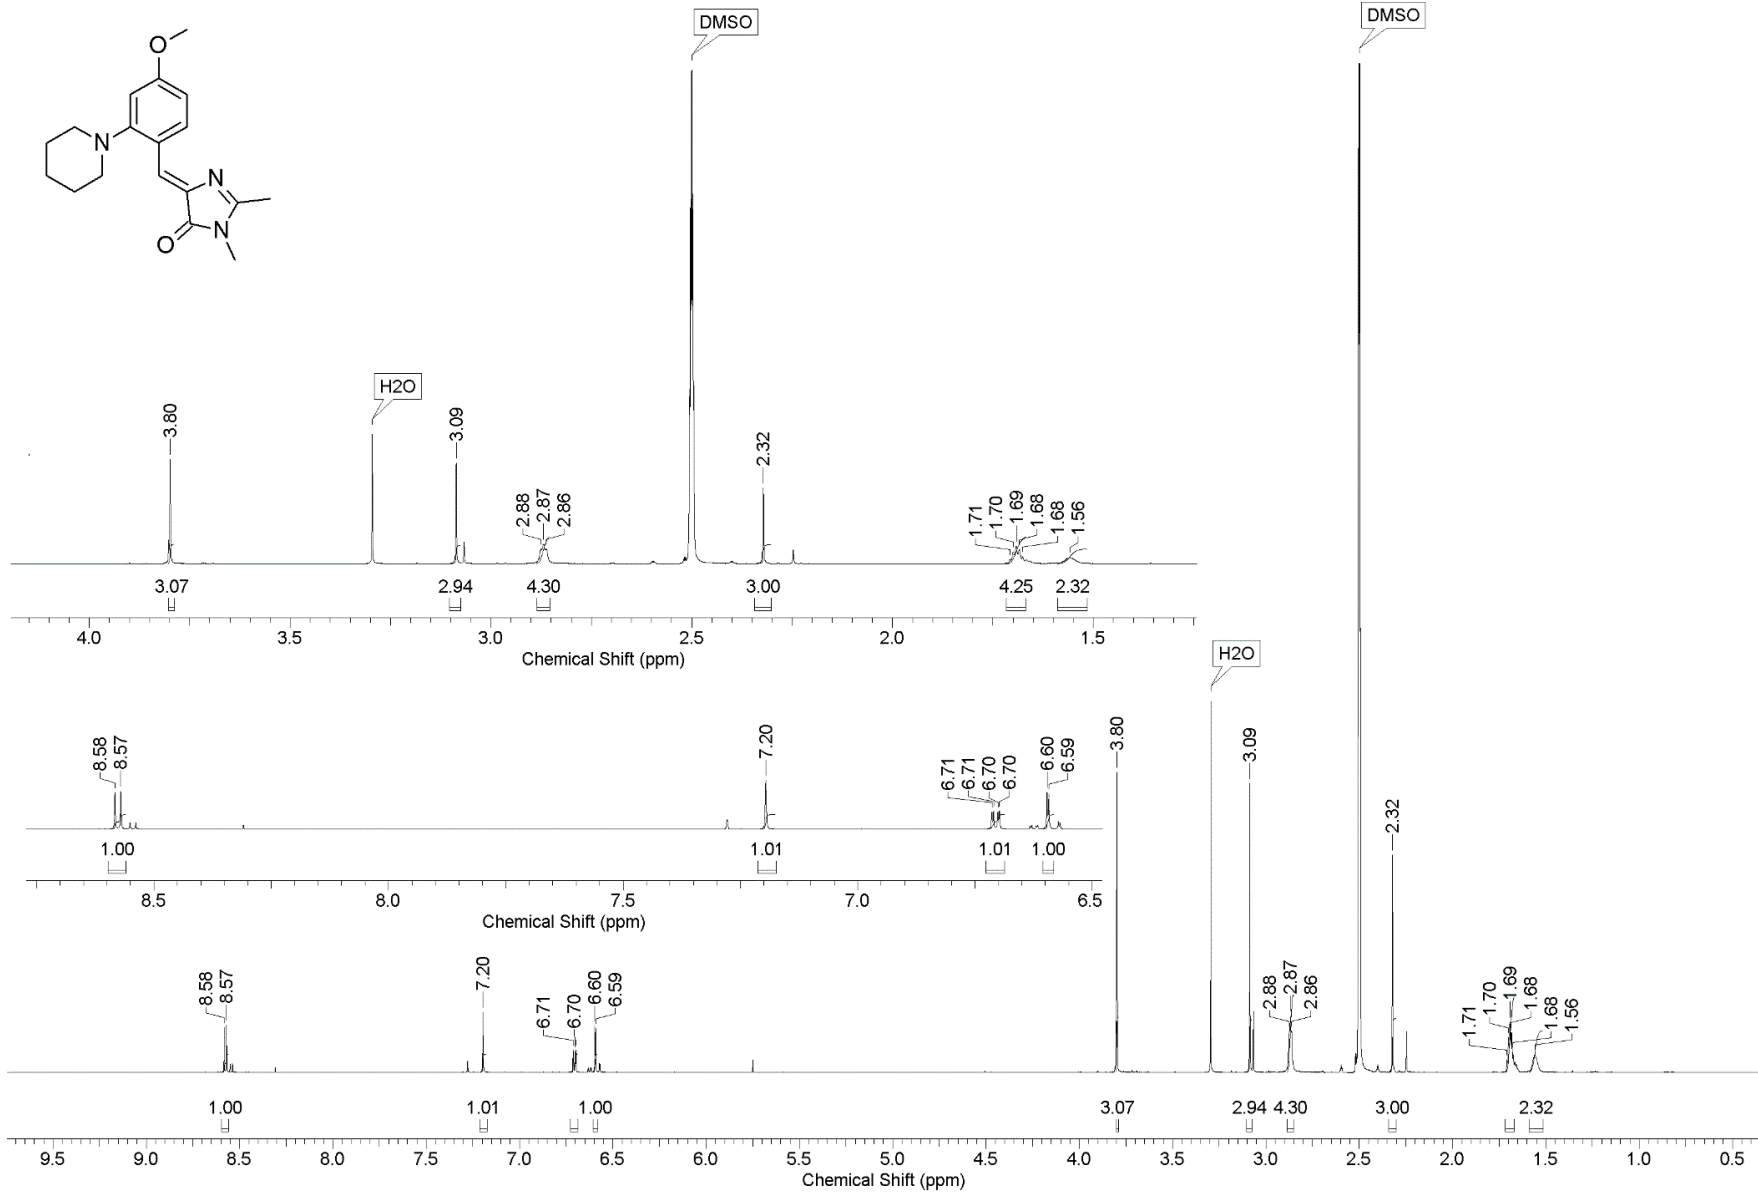

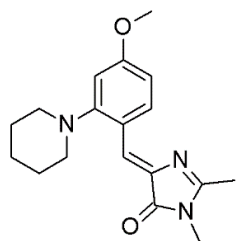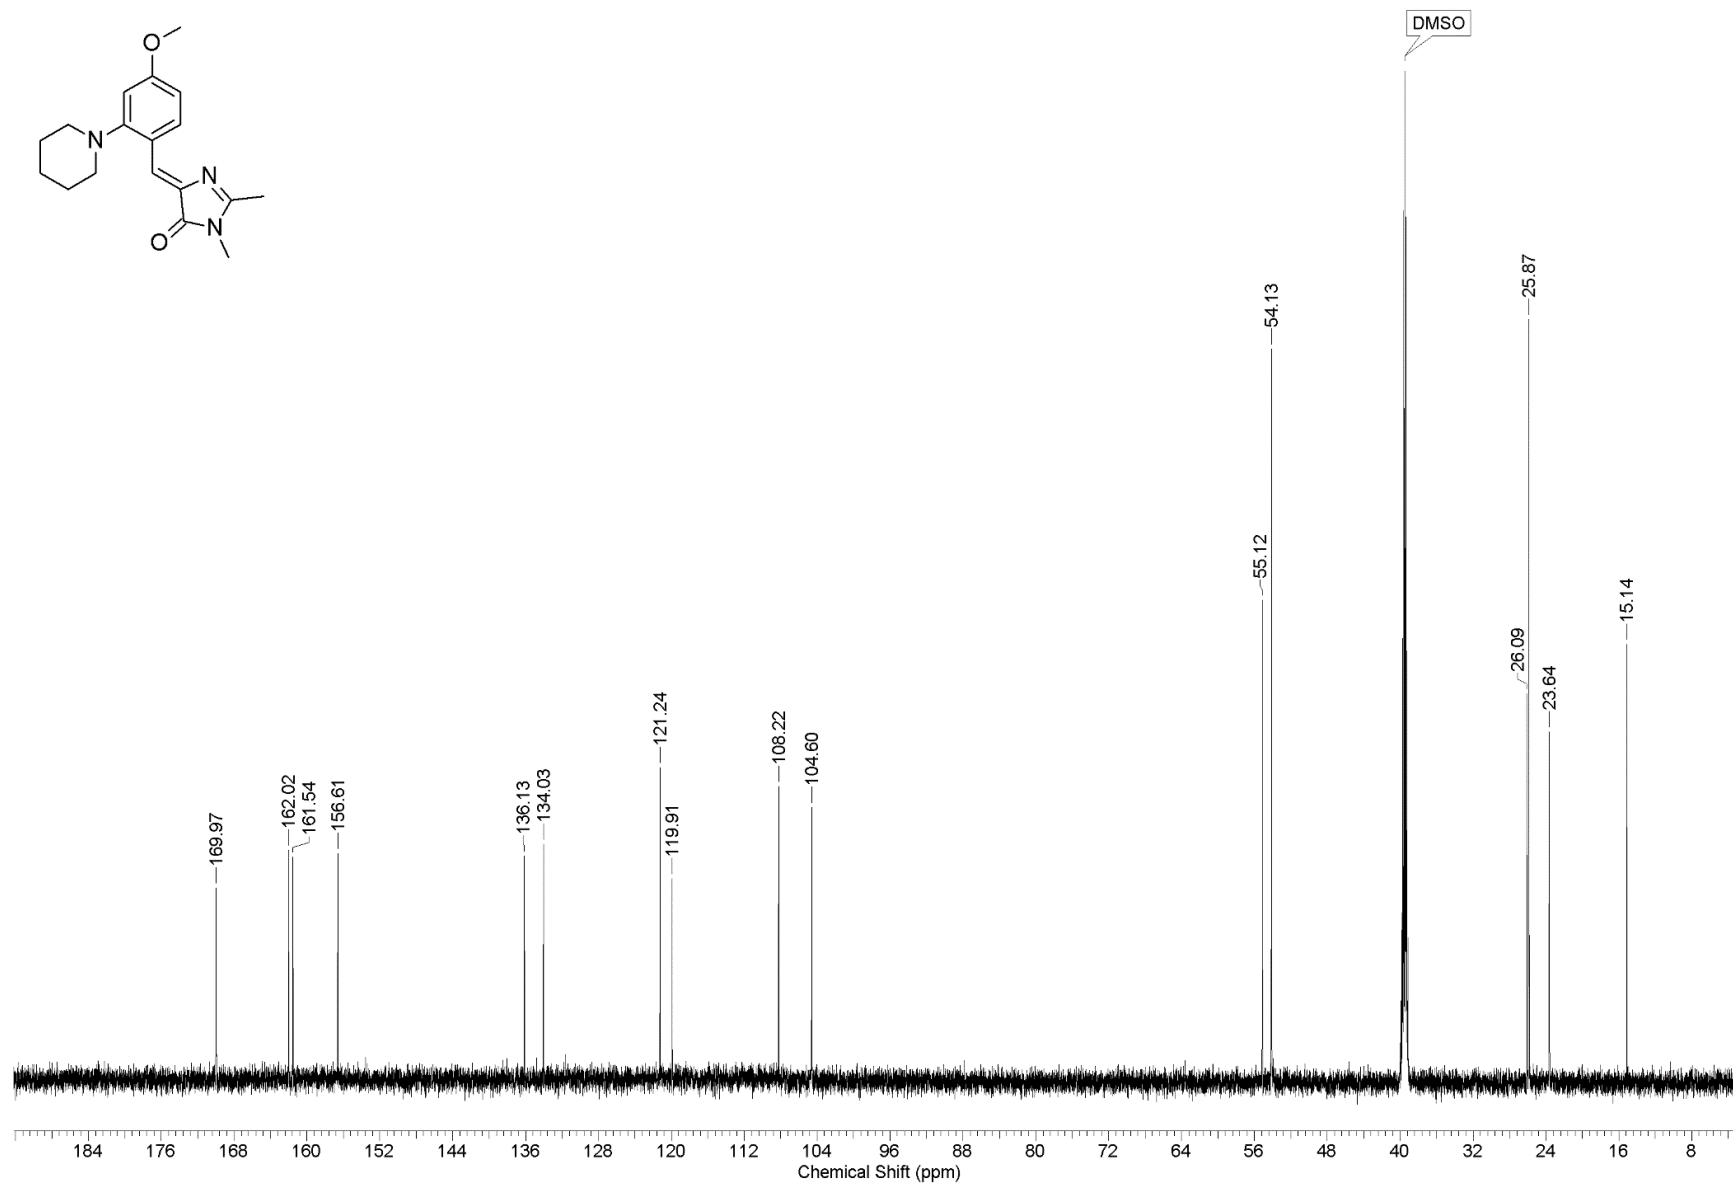



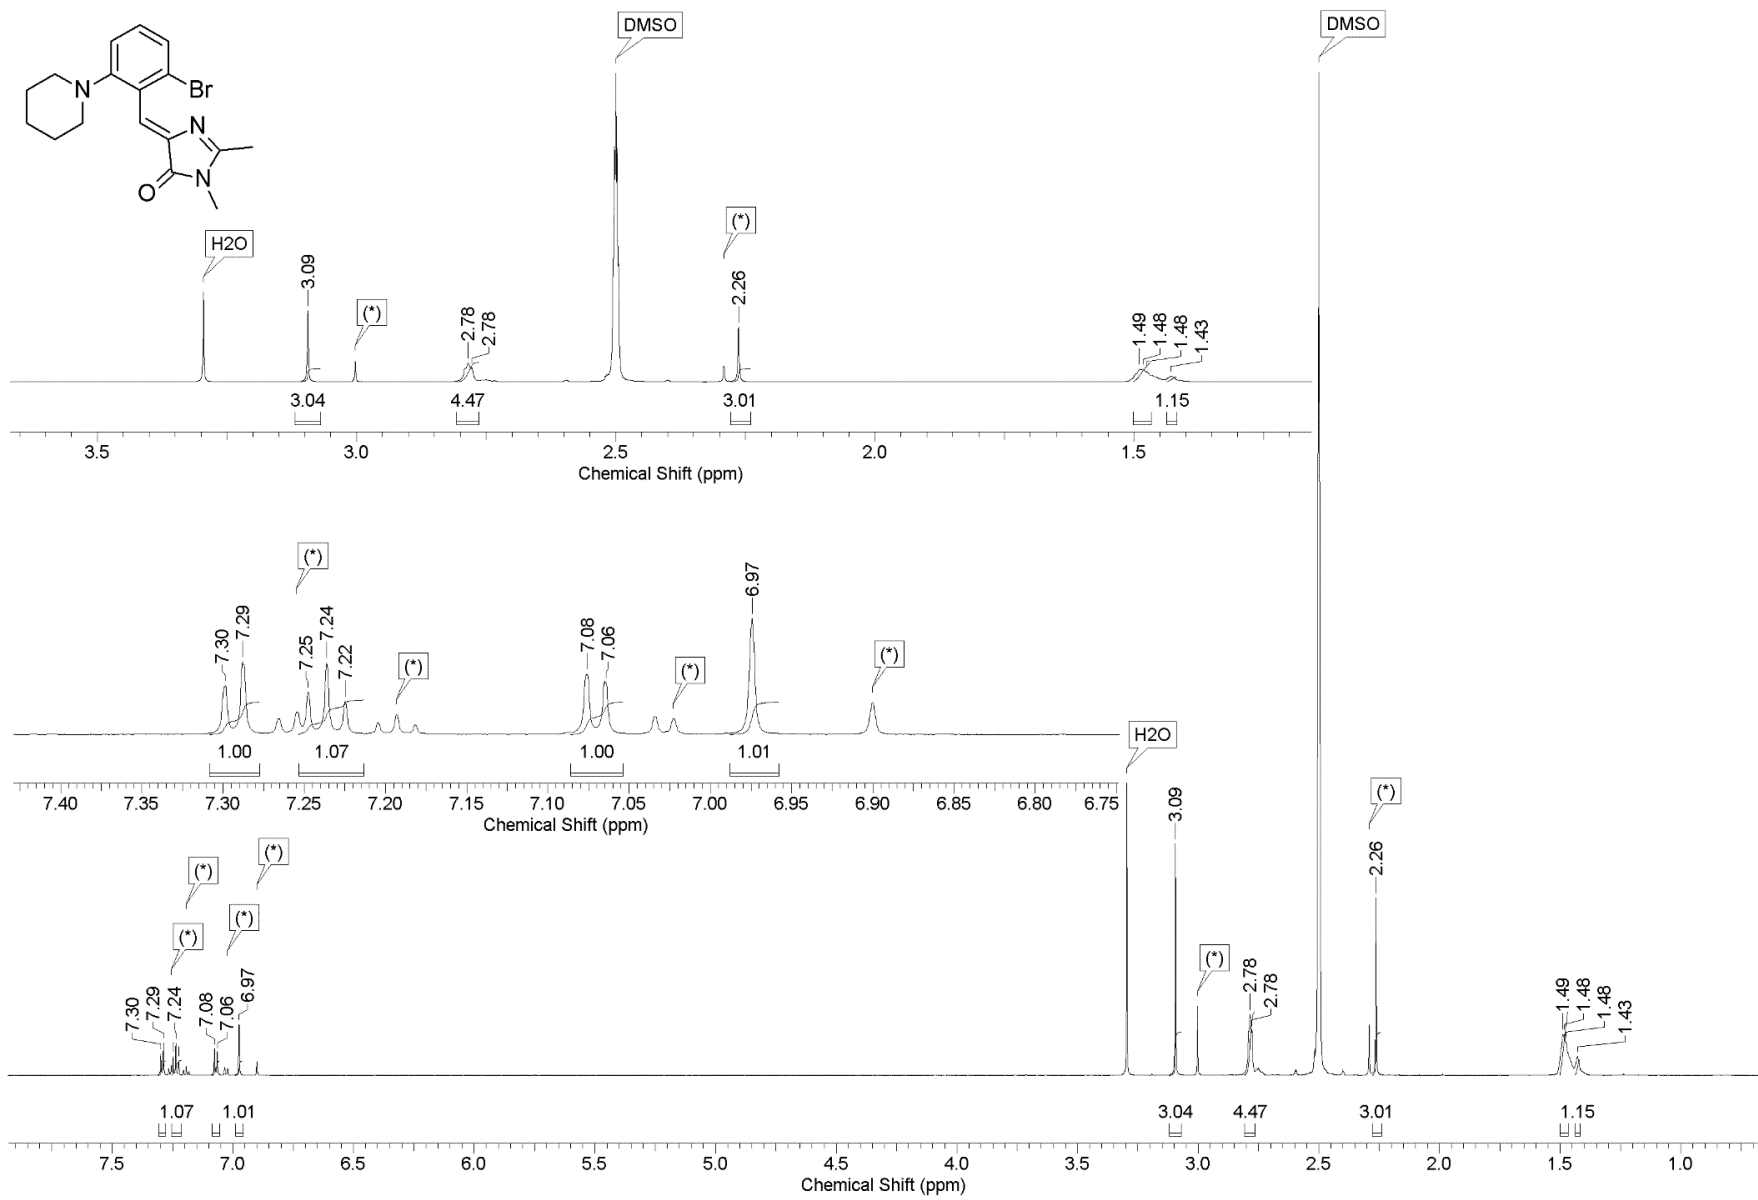

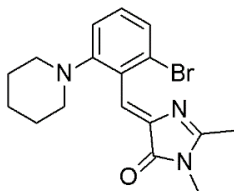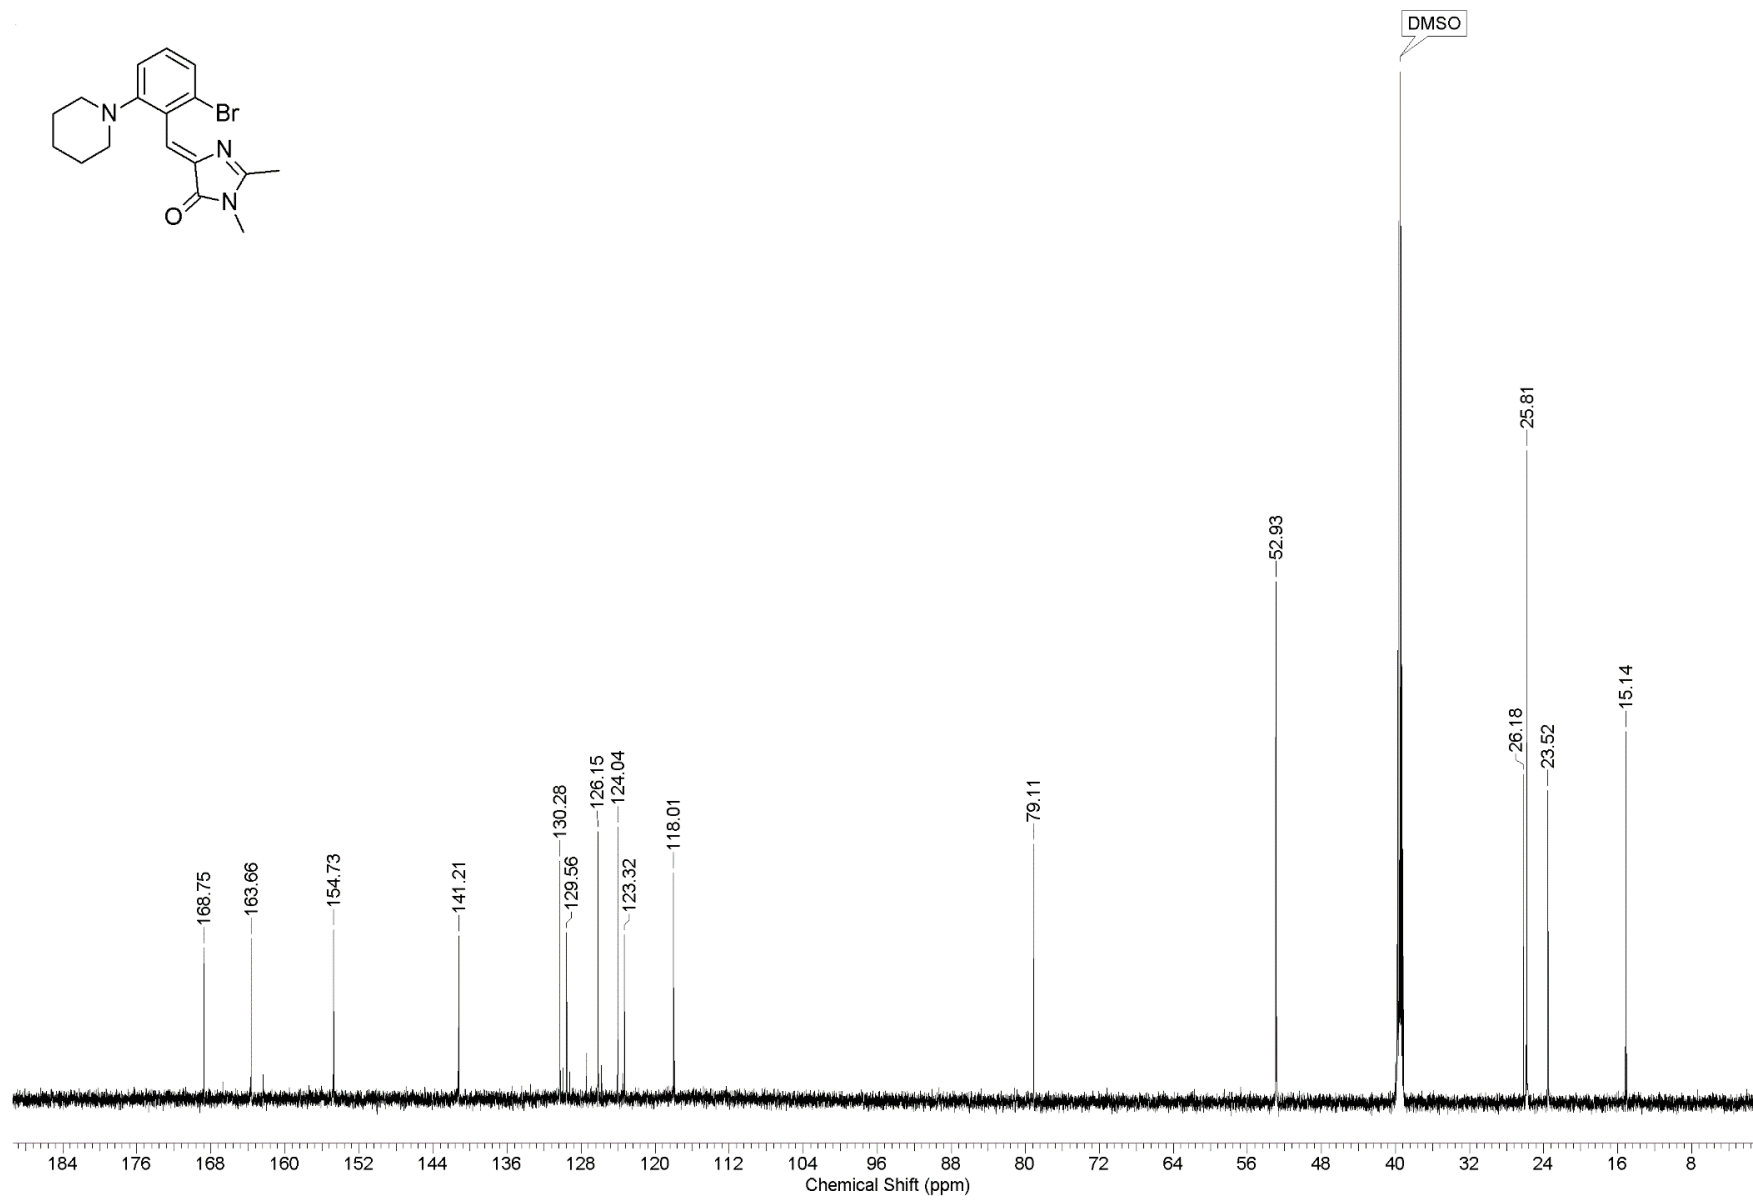

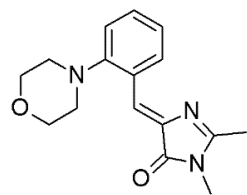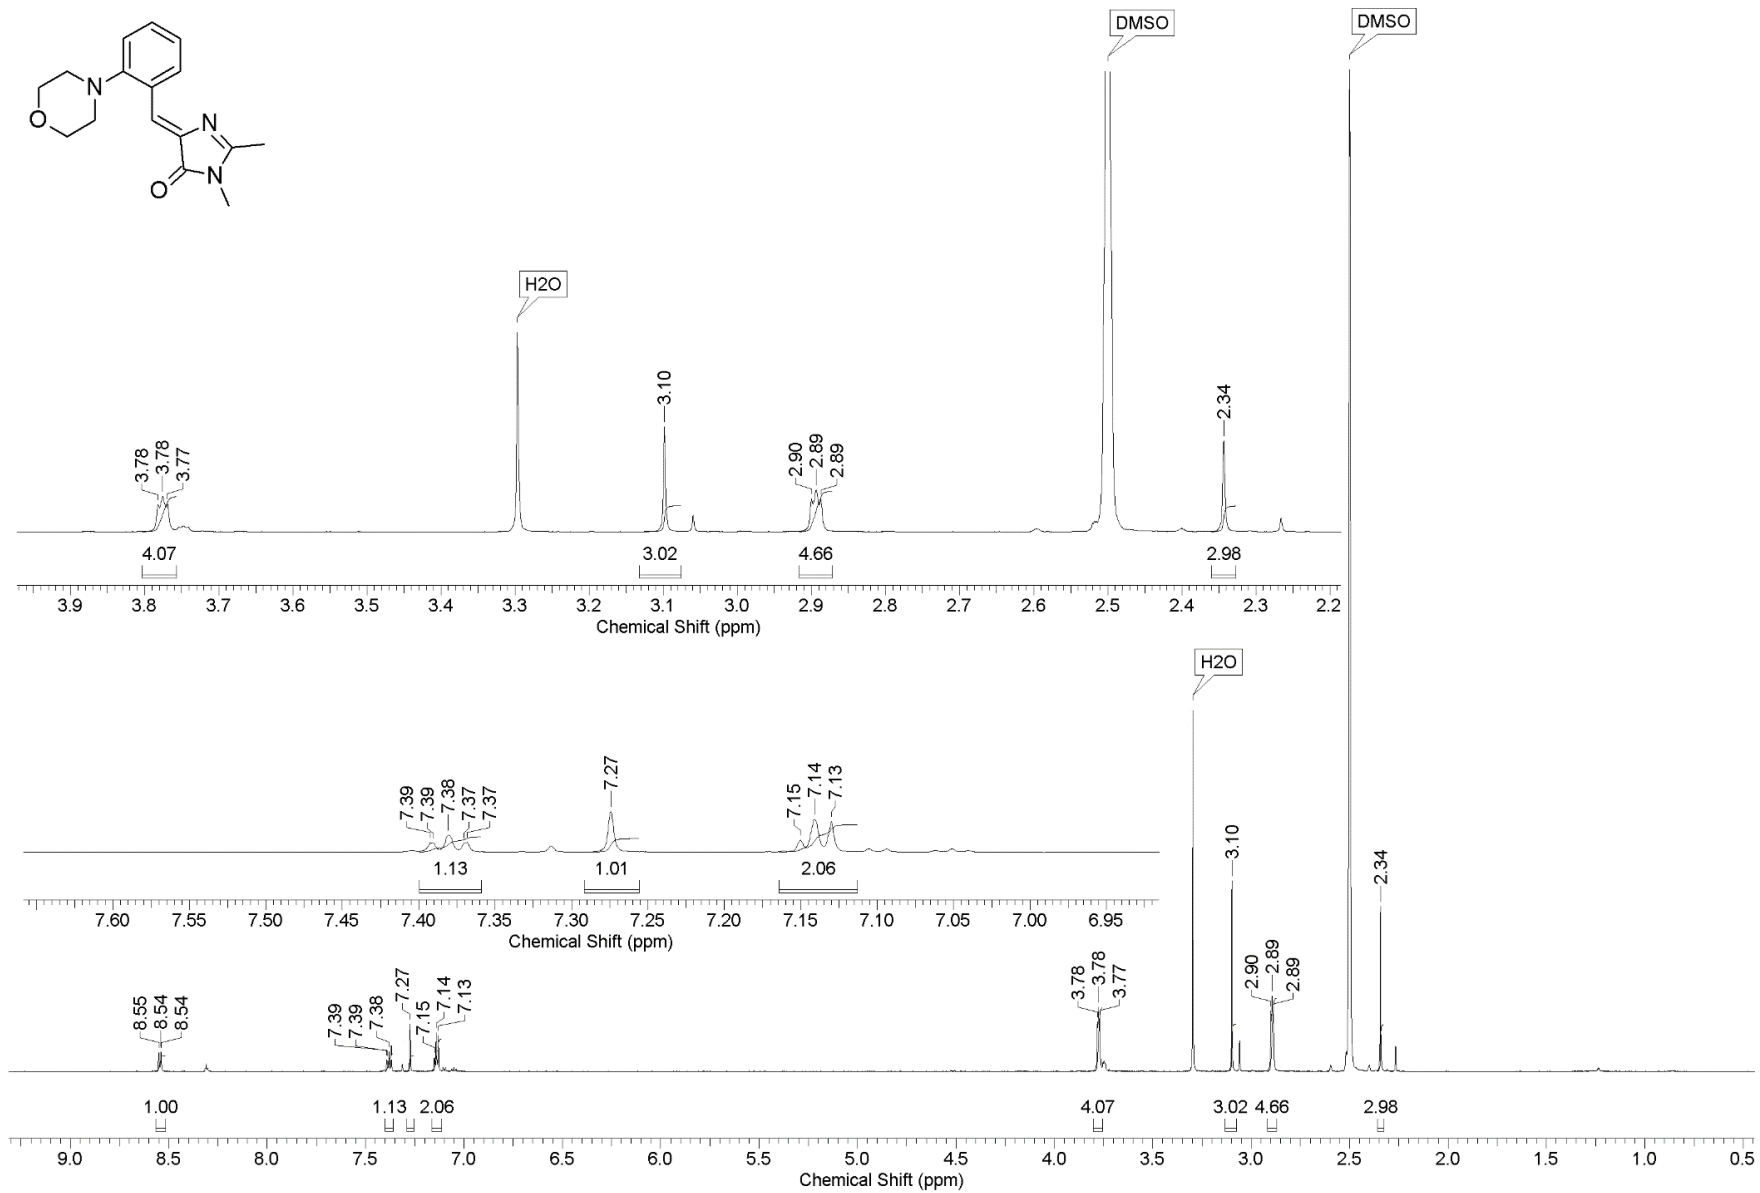

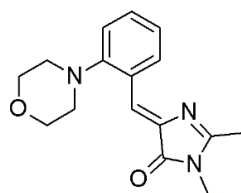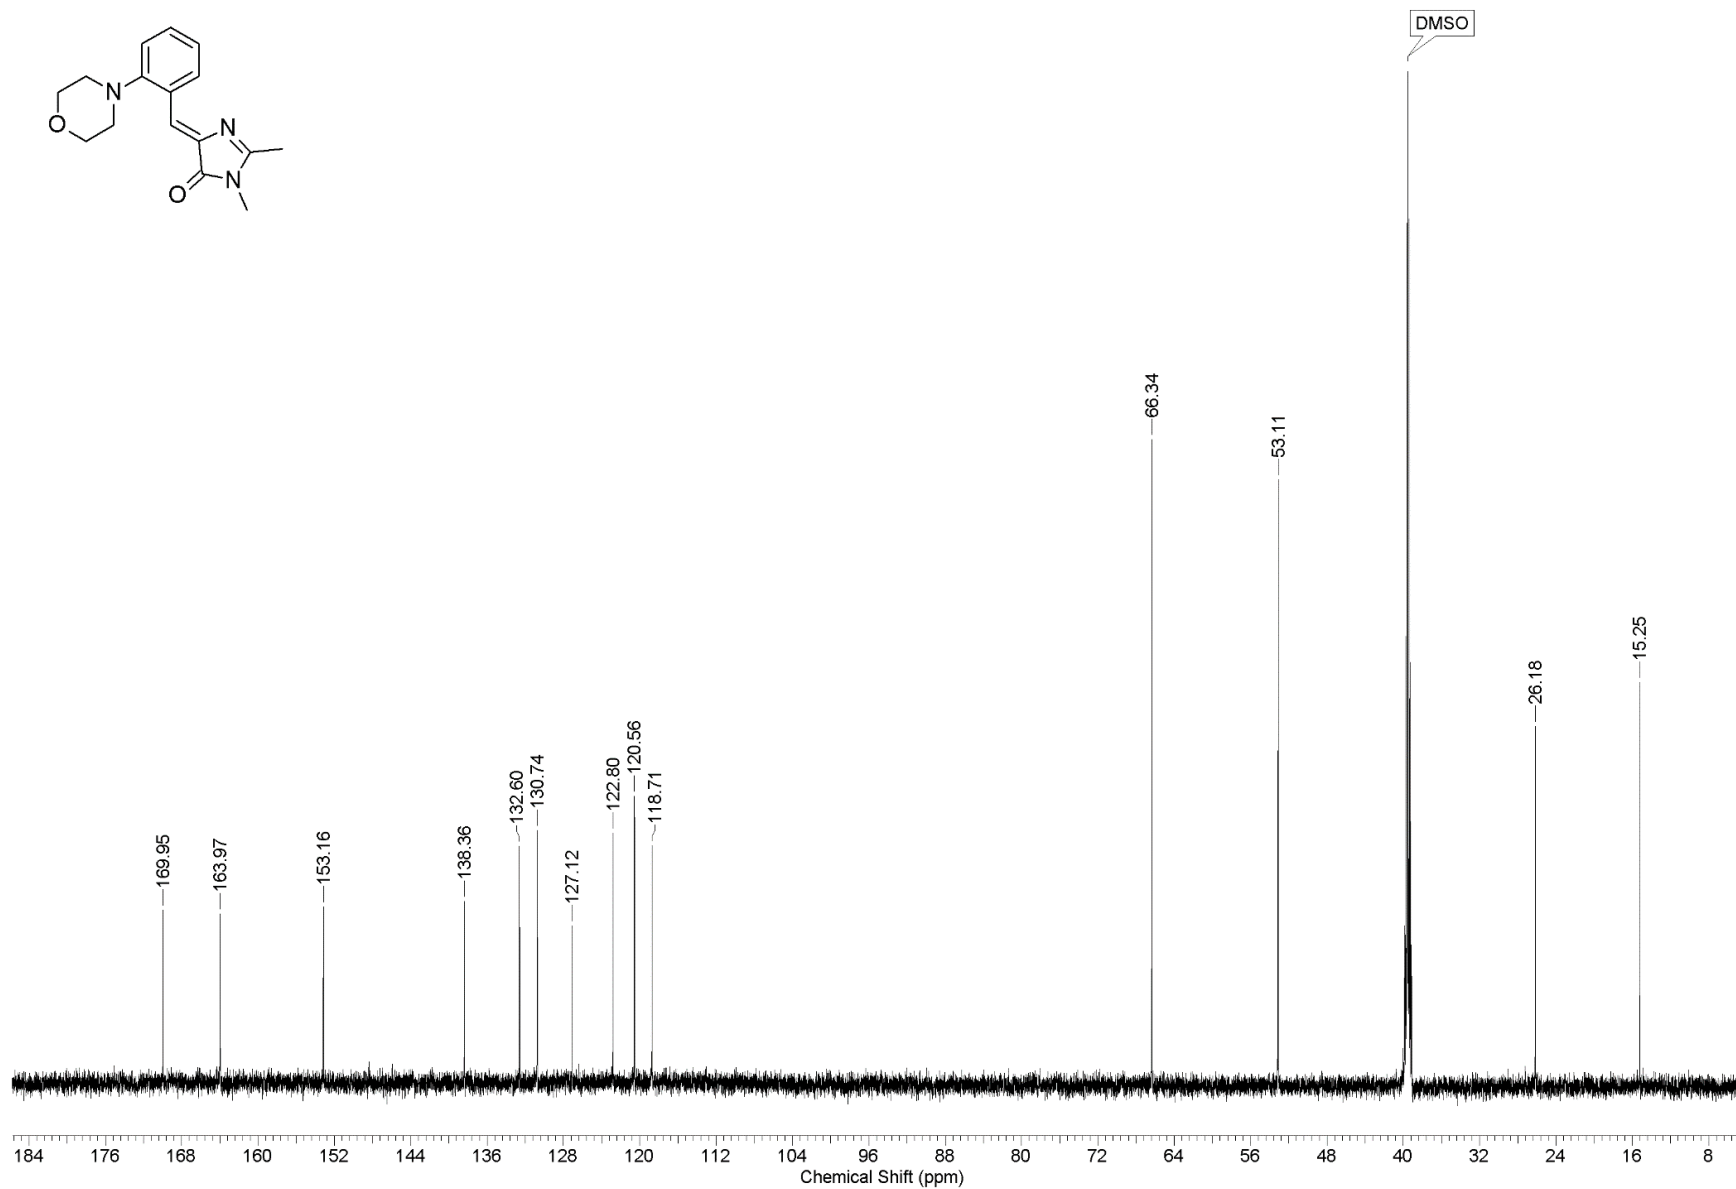

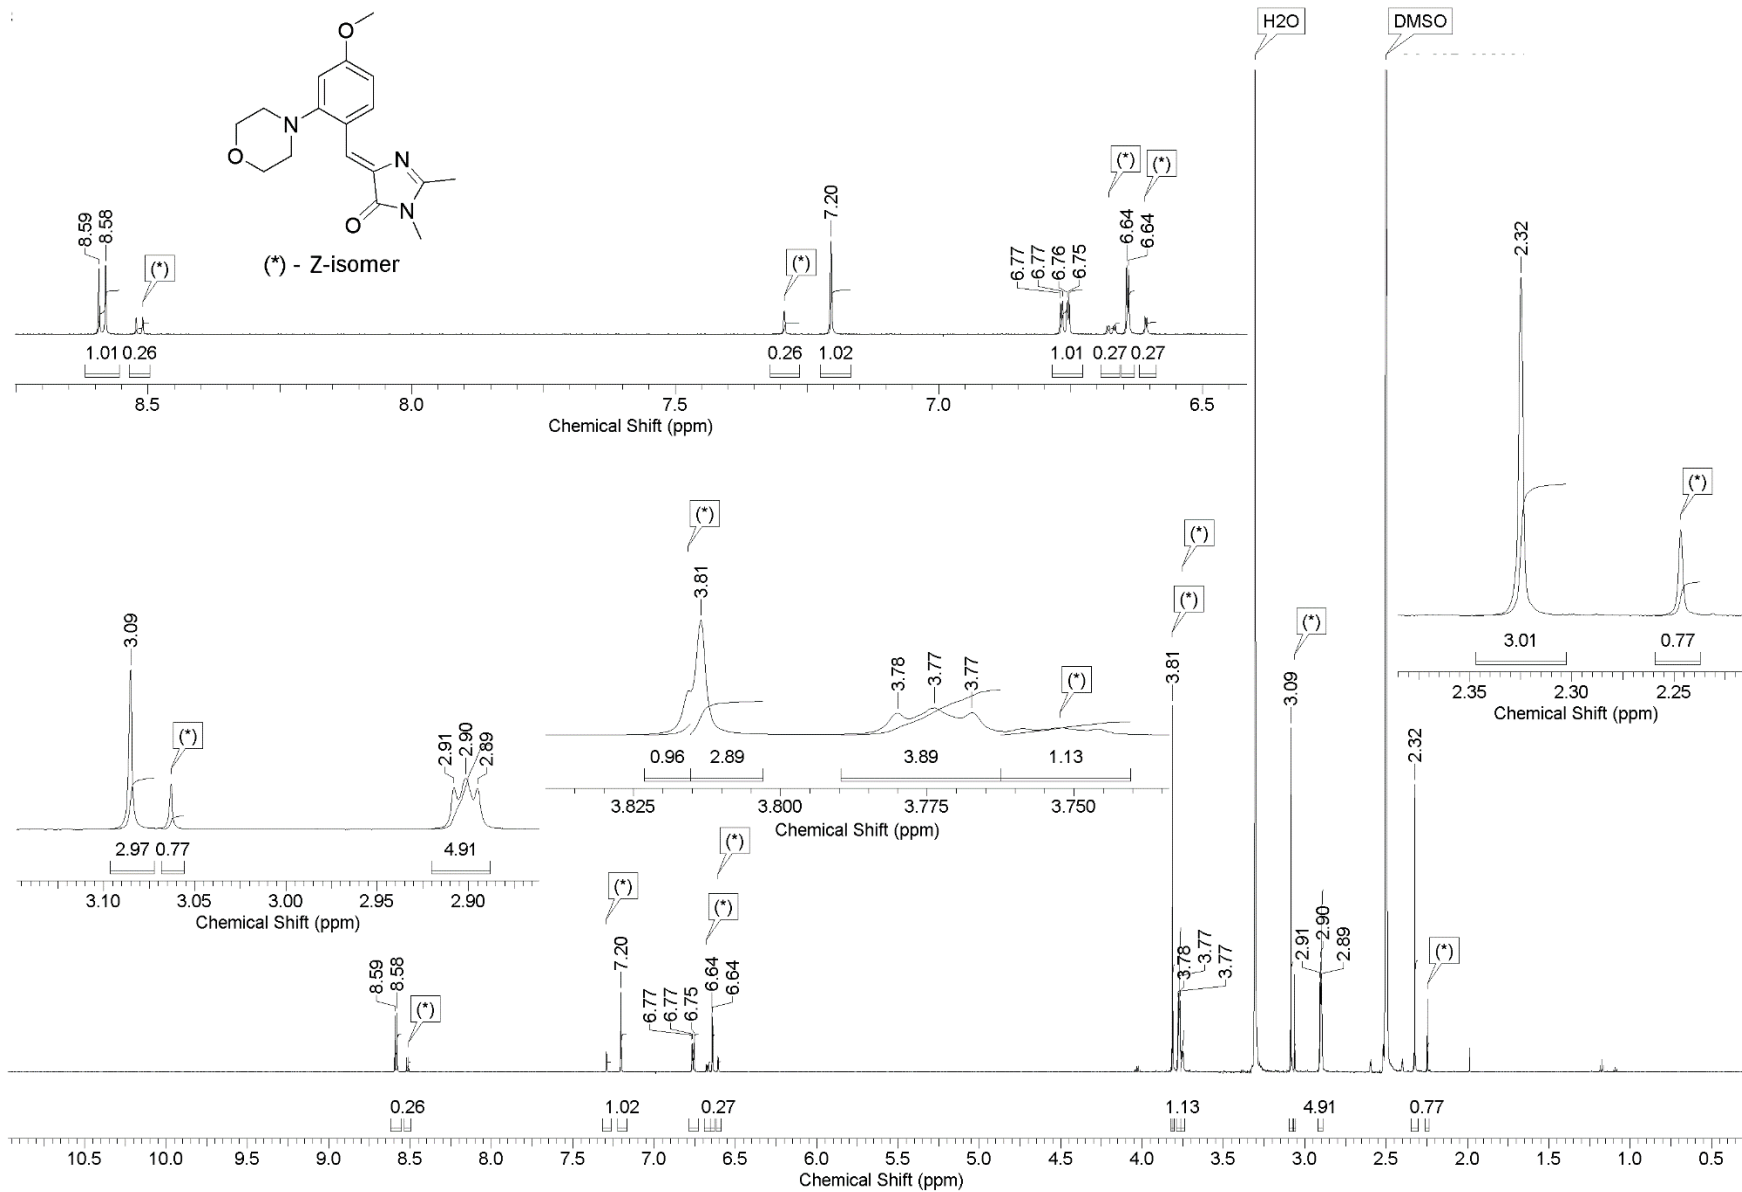

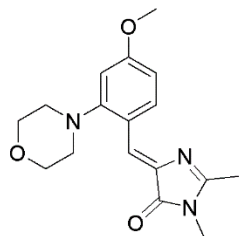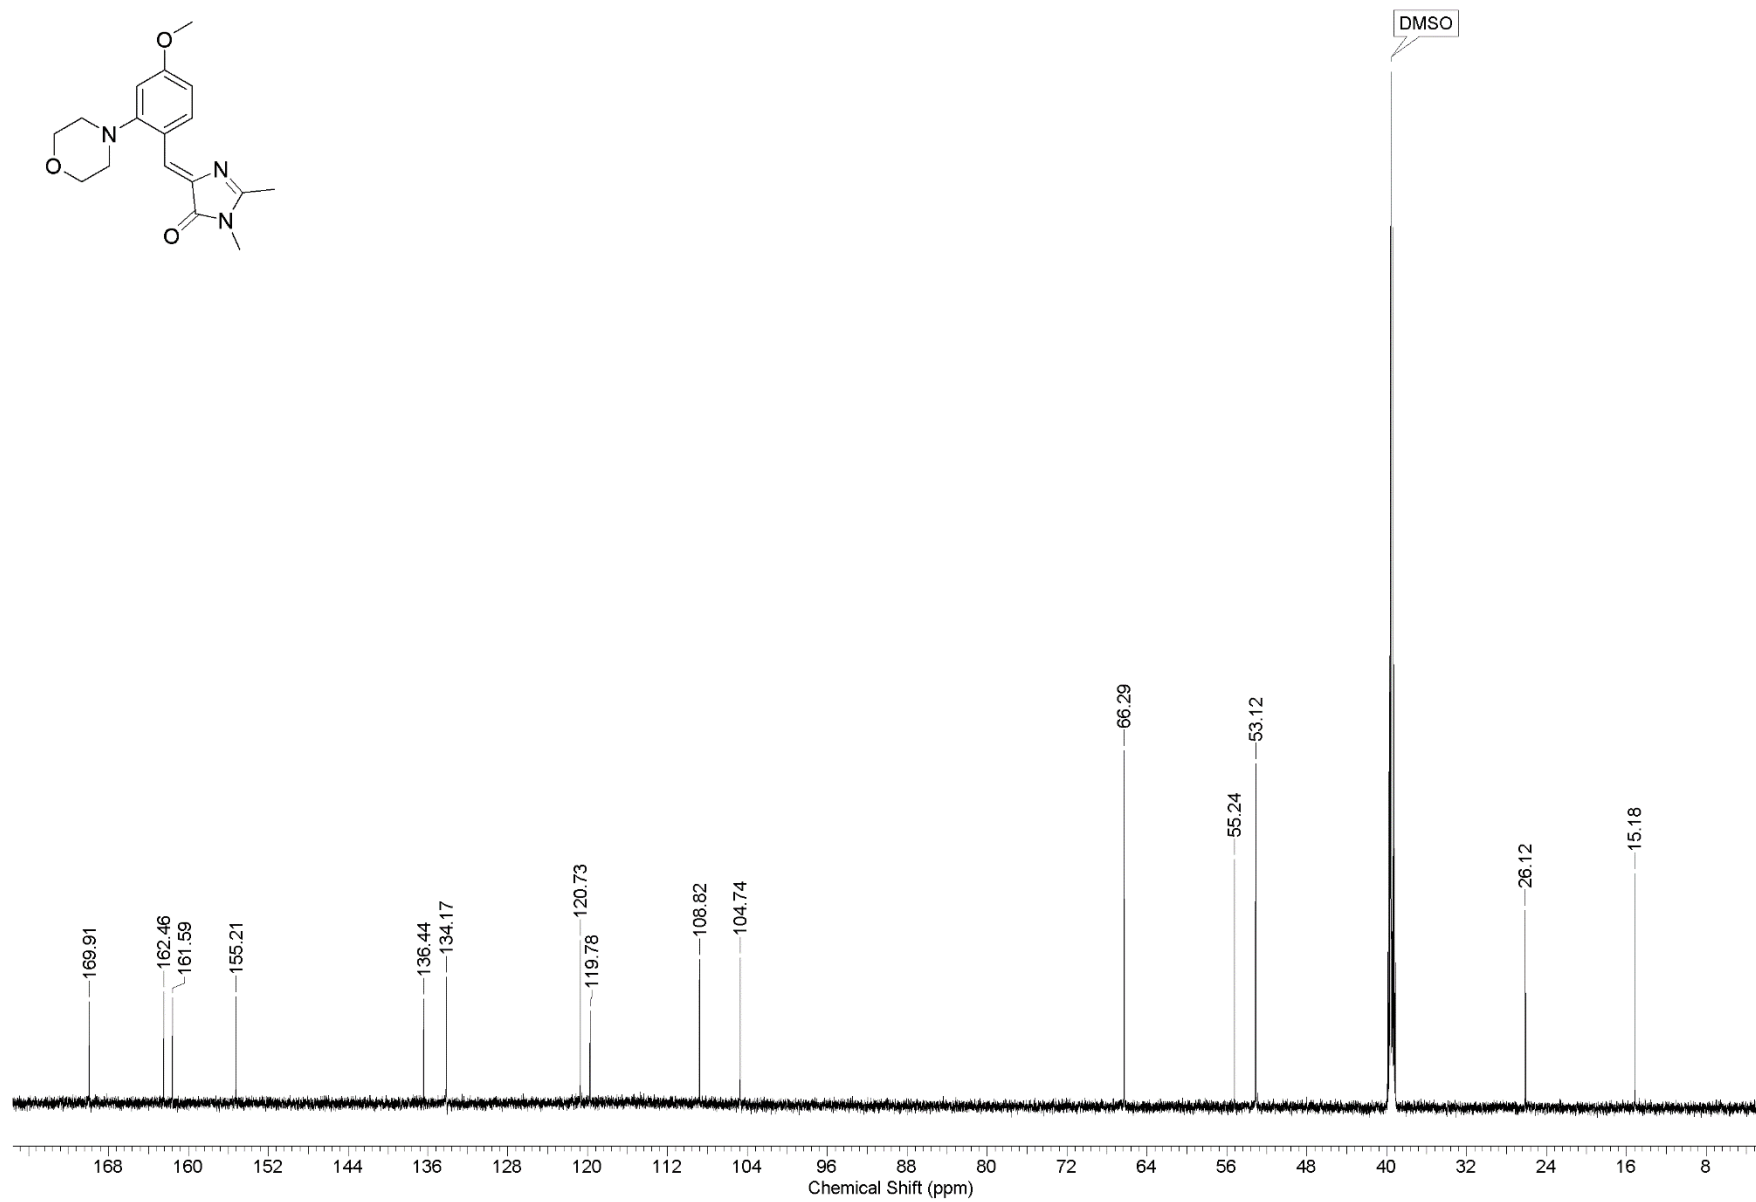

S86

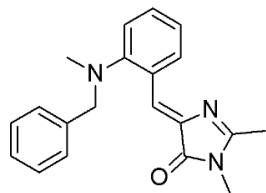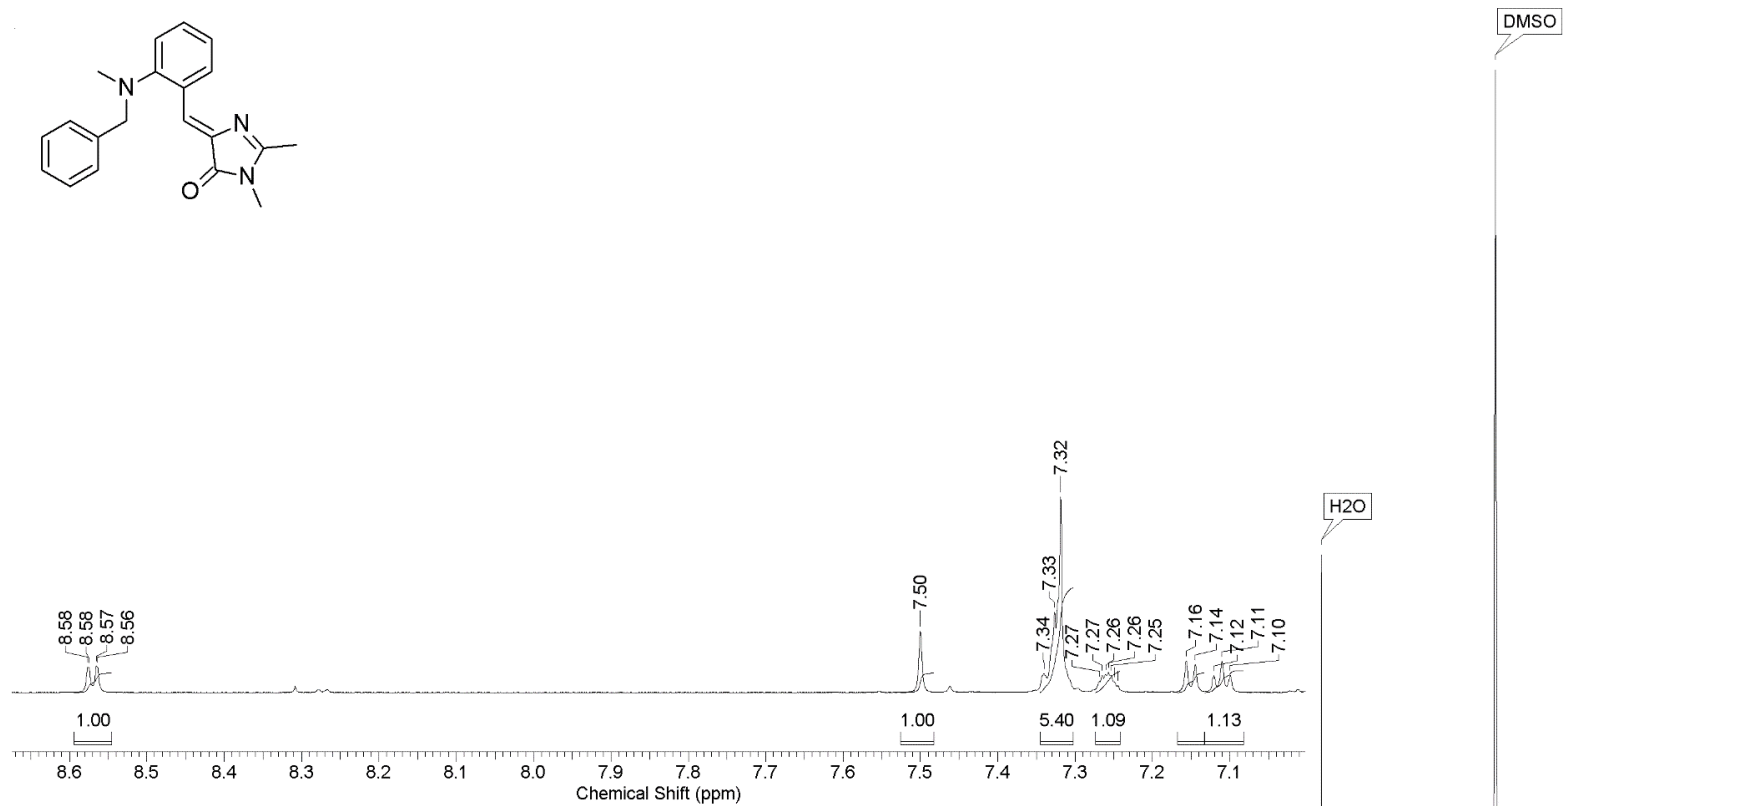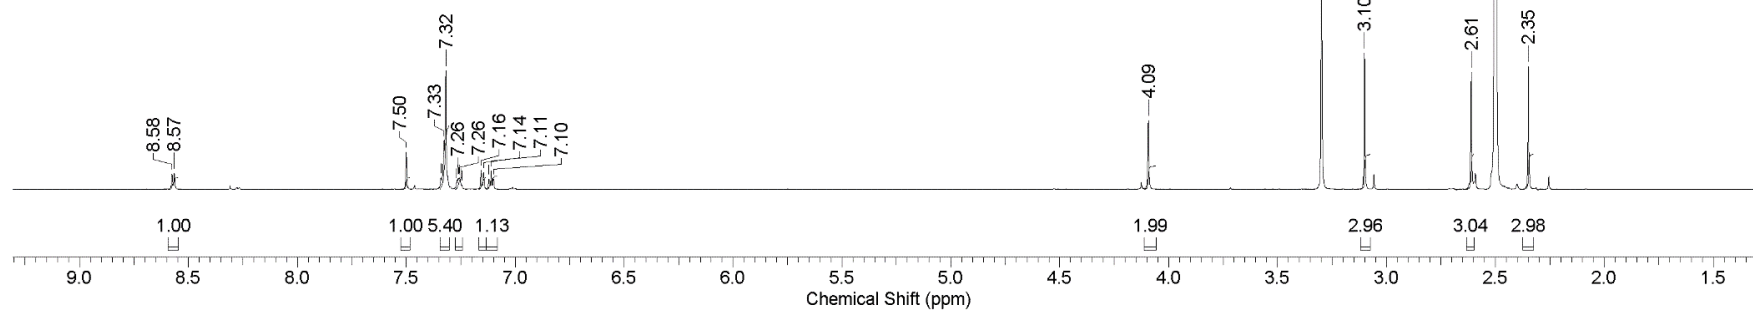

S87

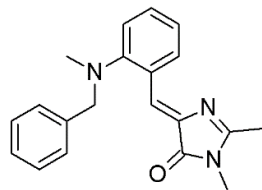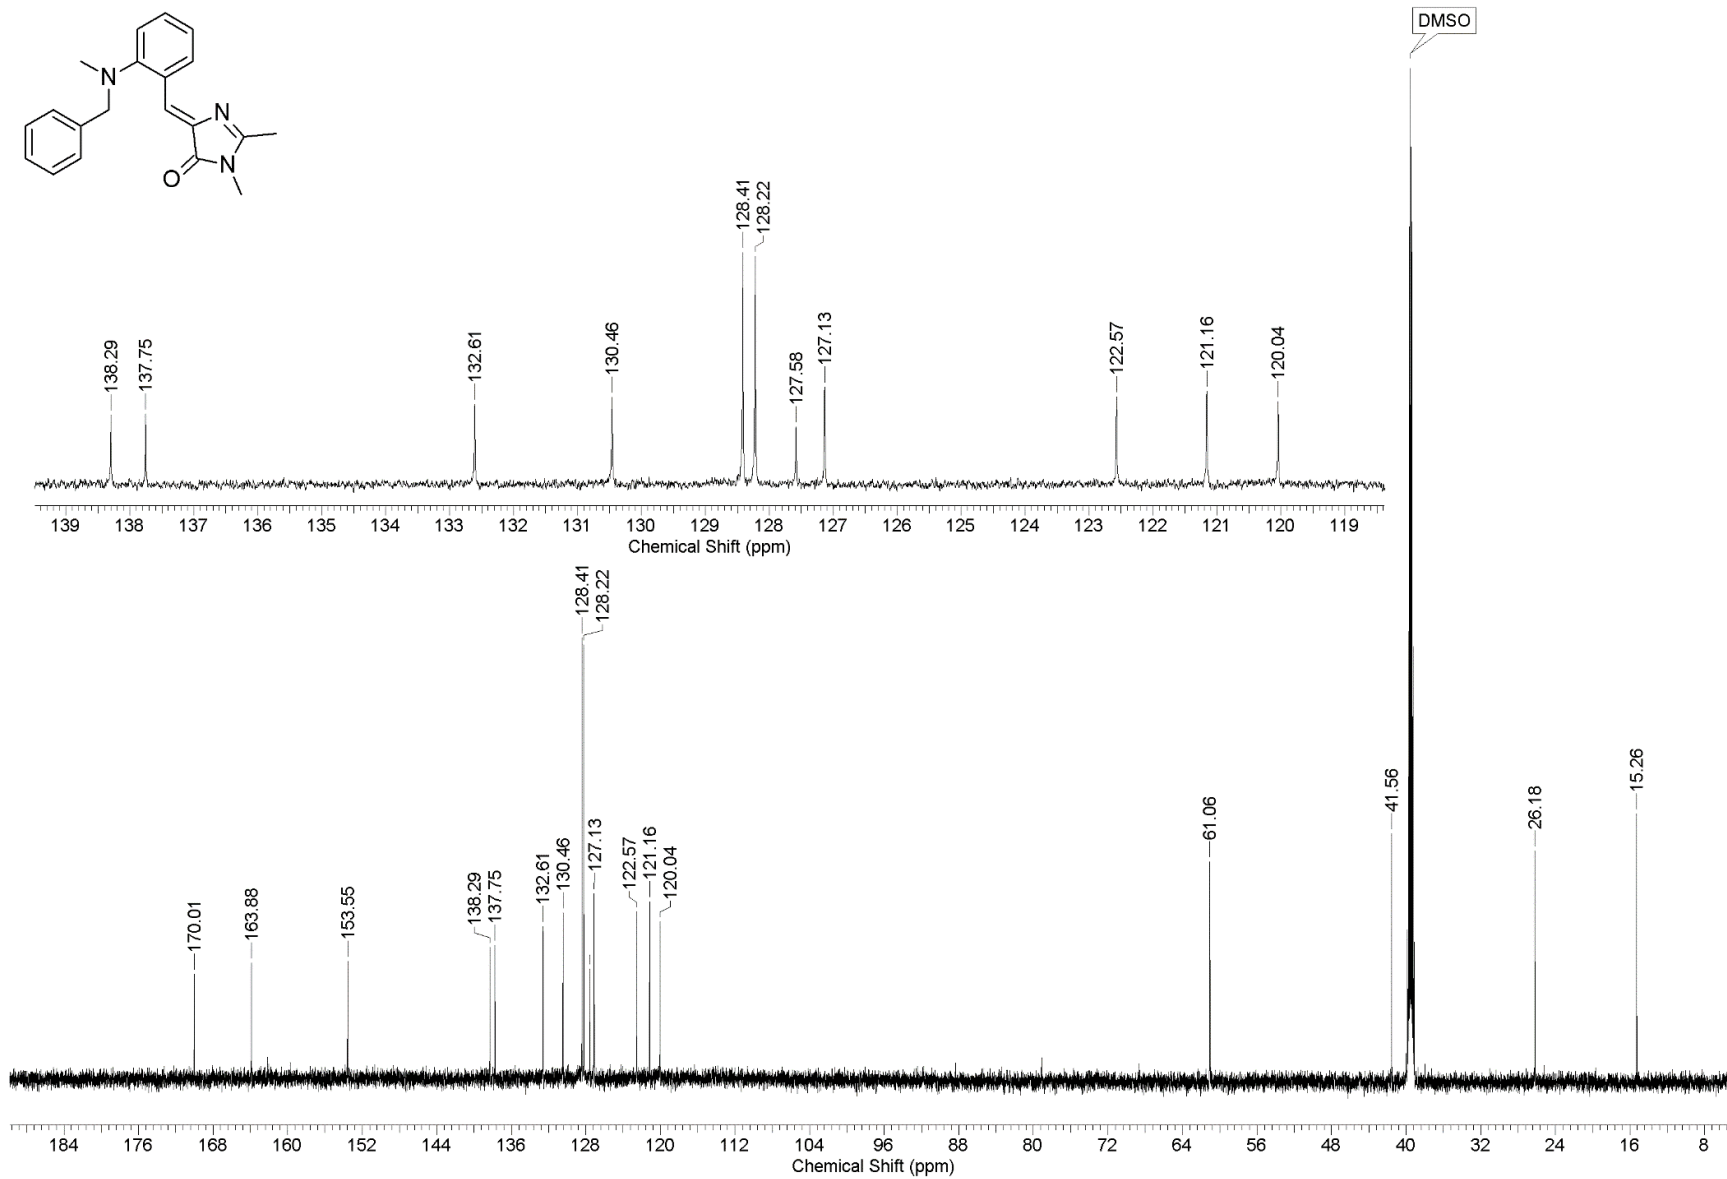



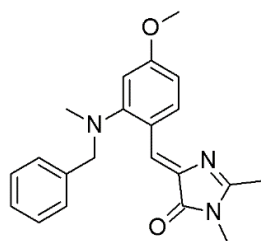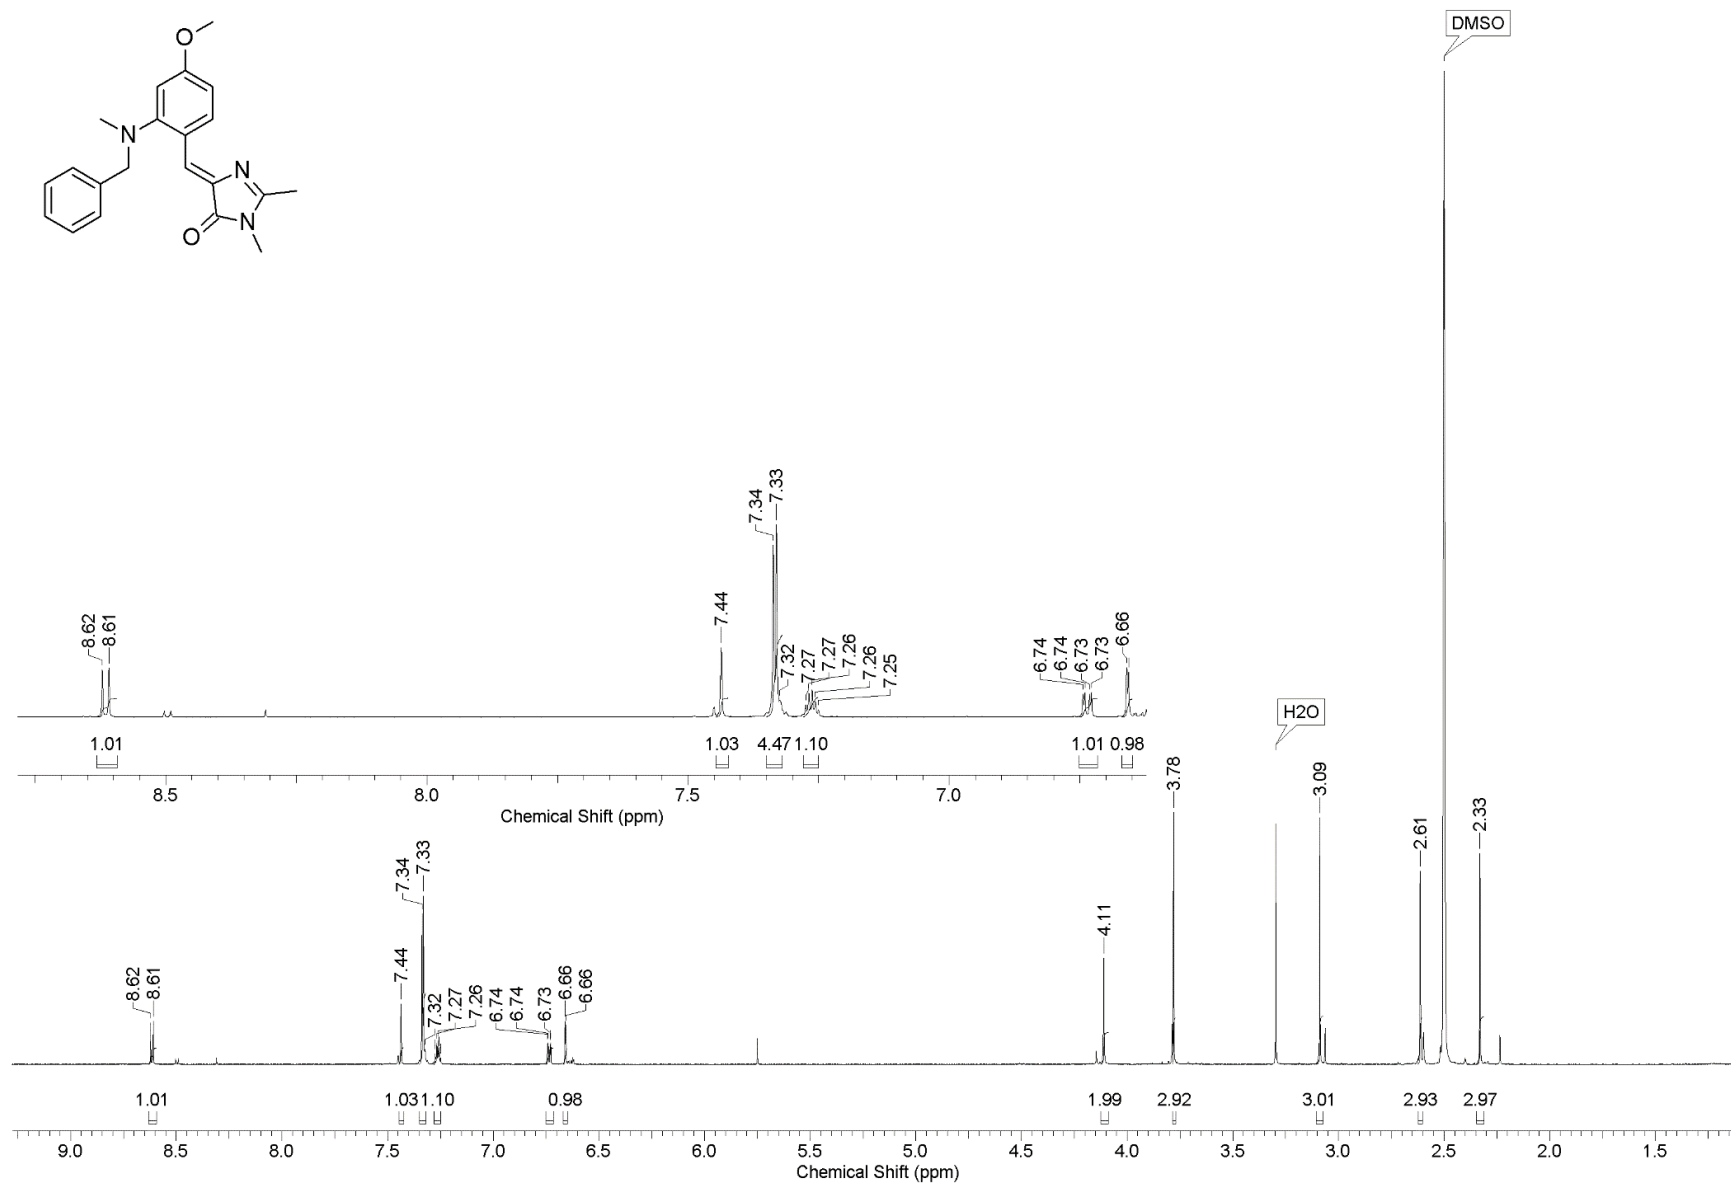

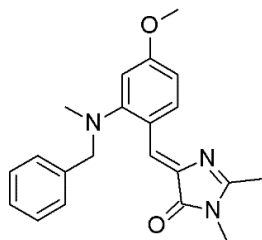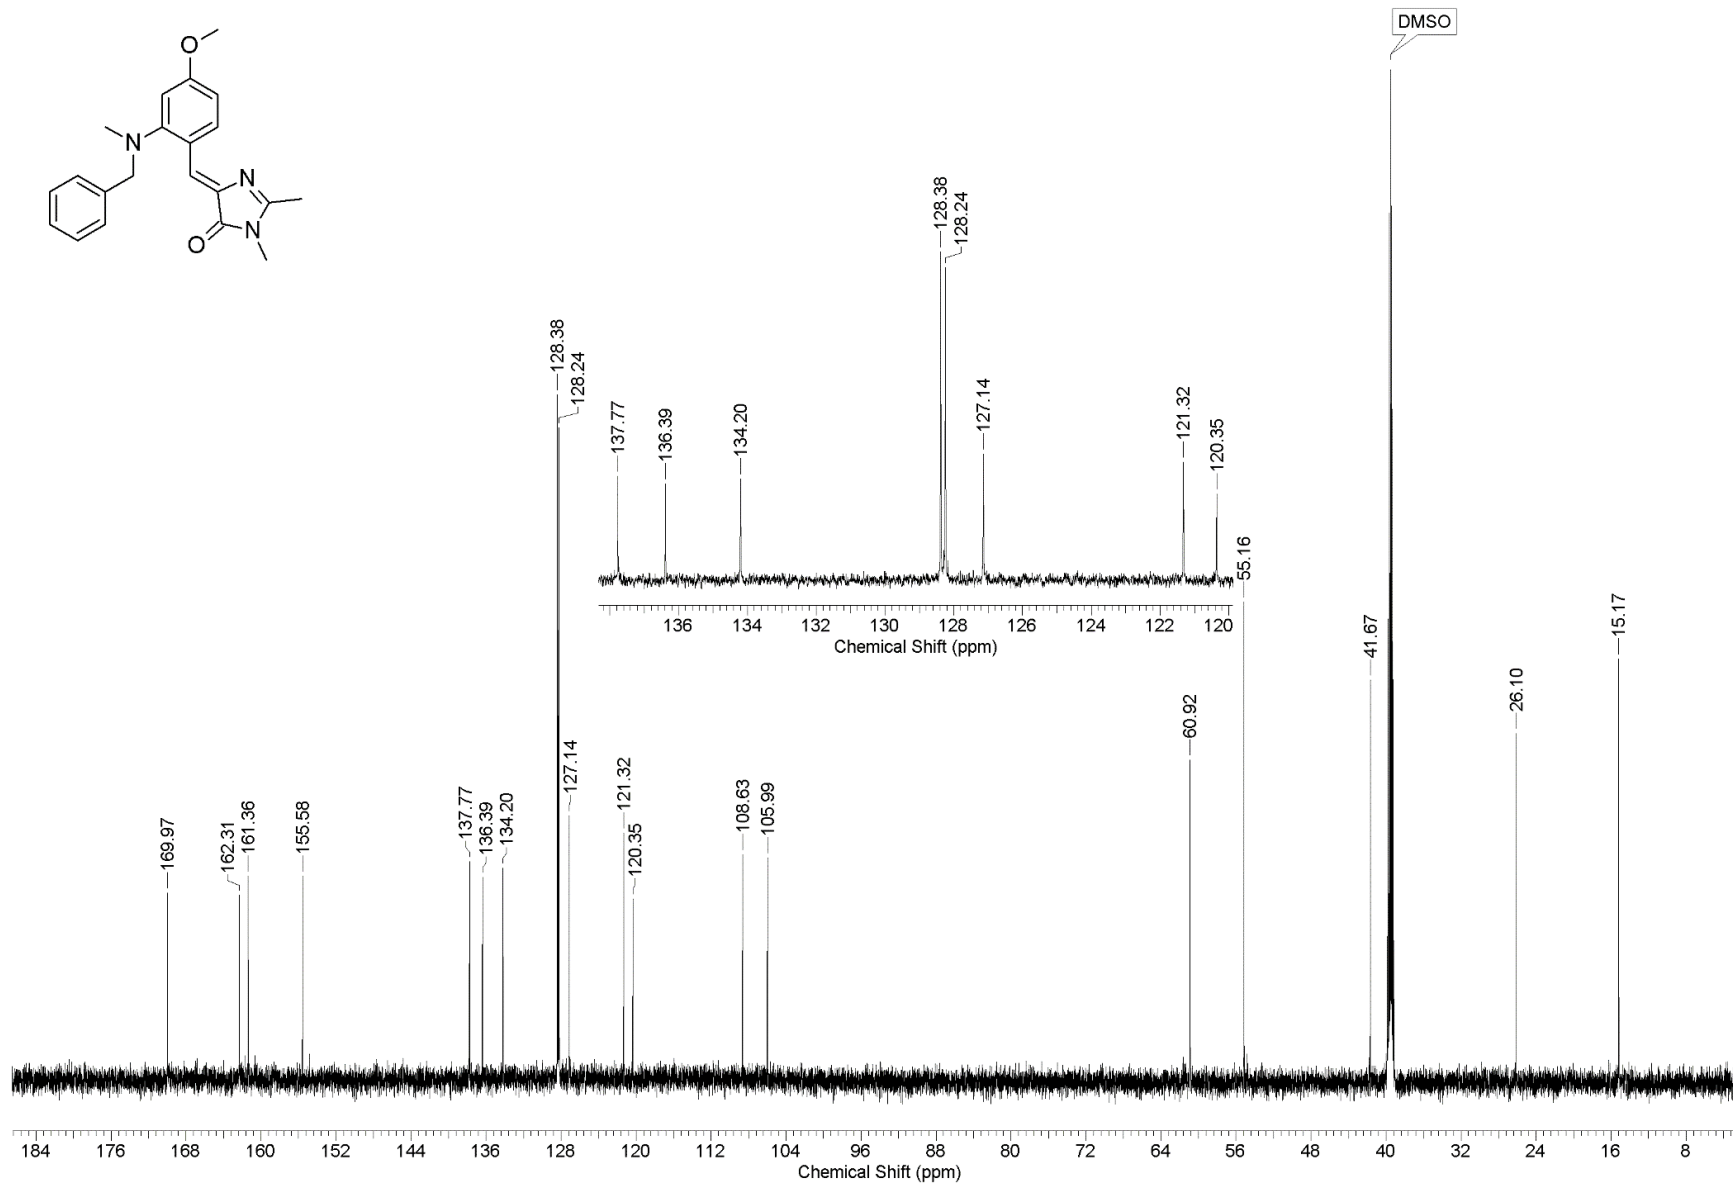

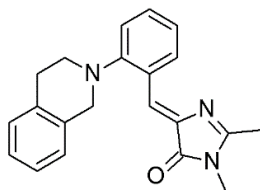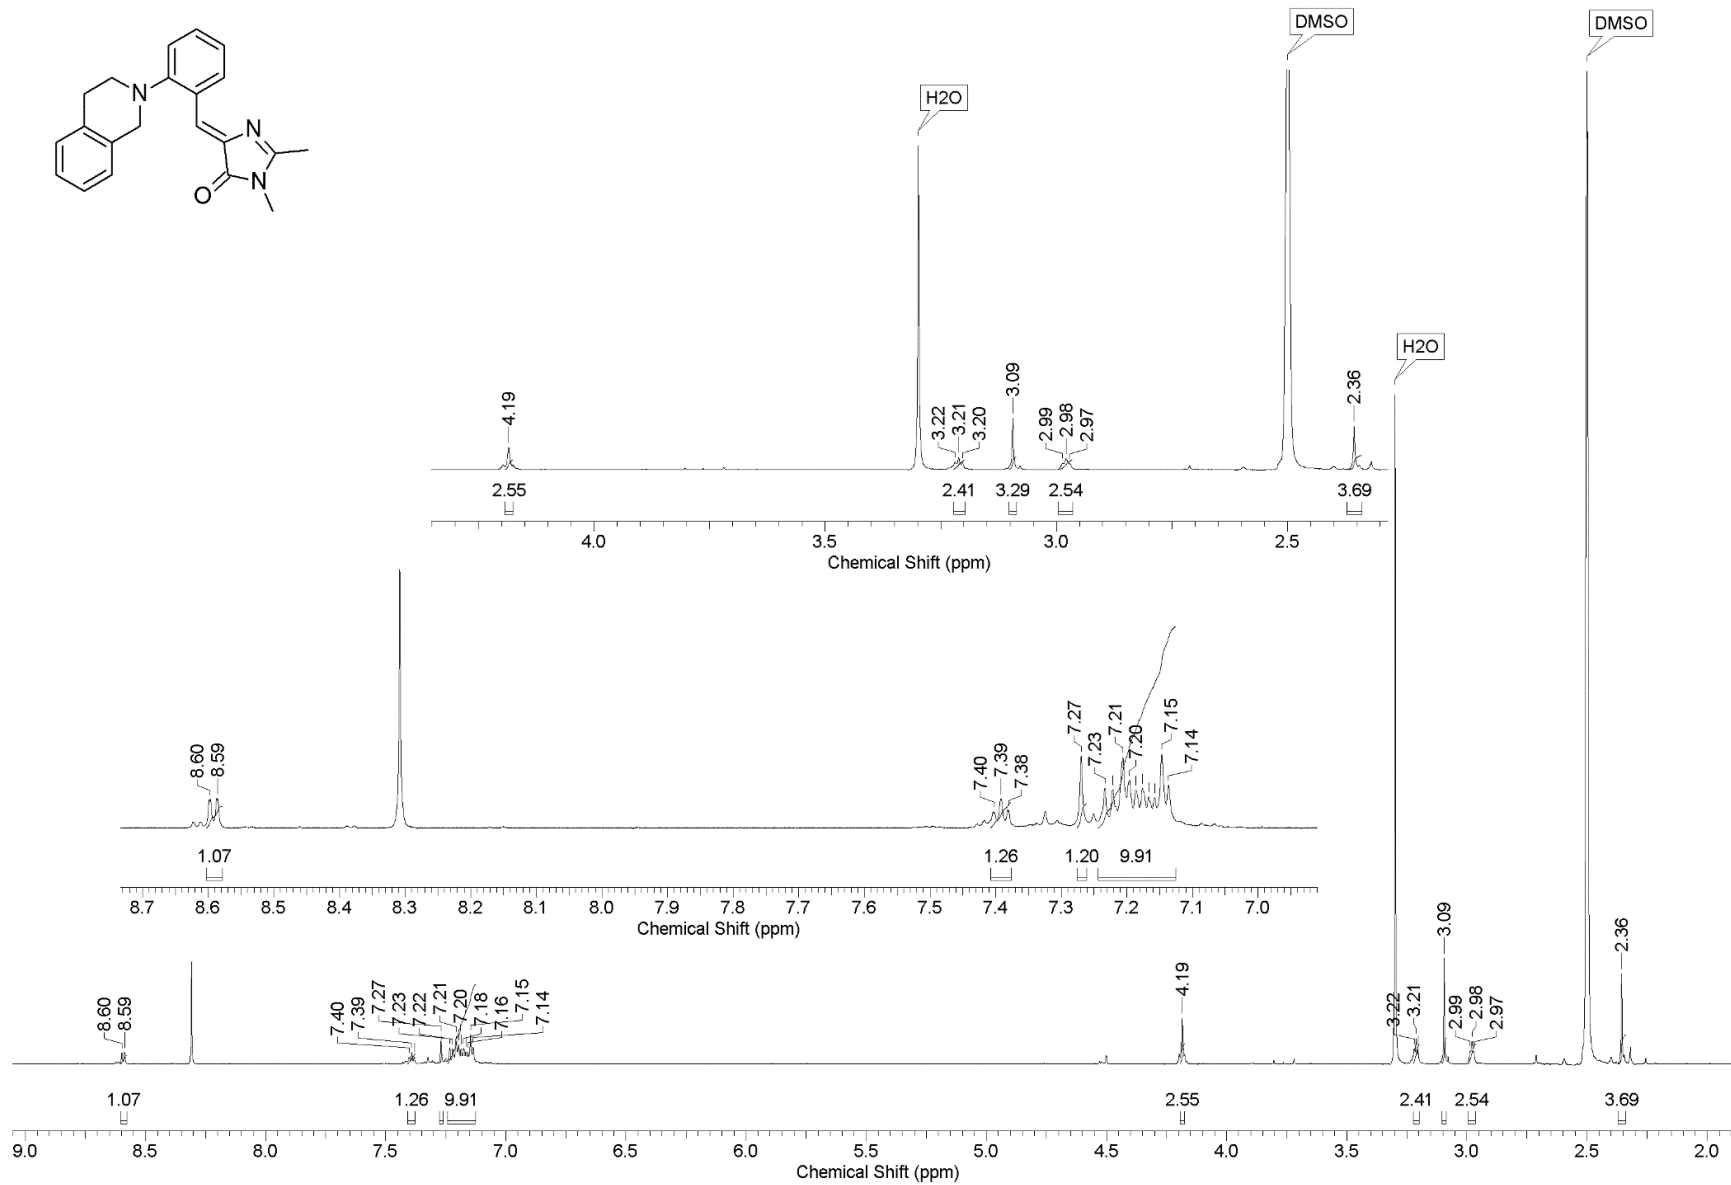

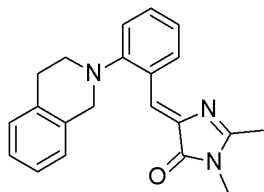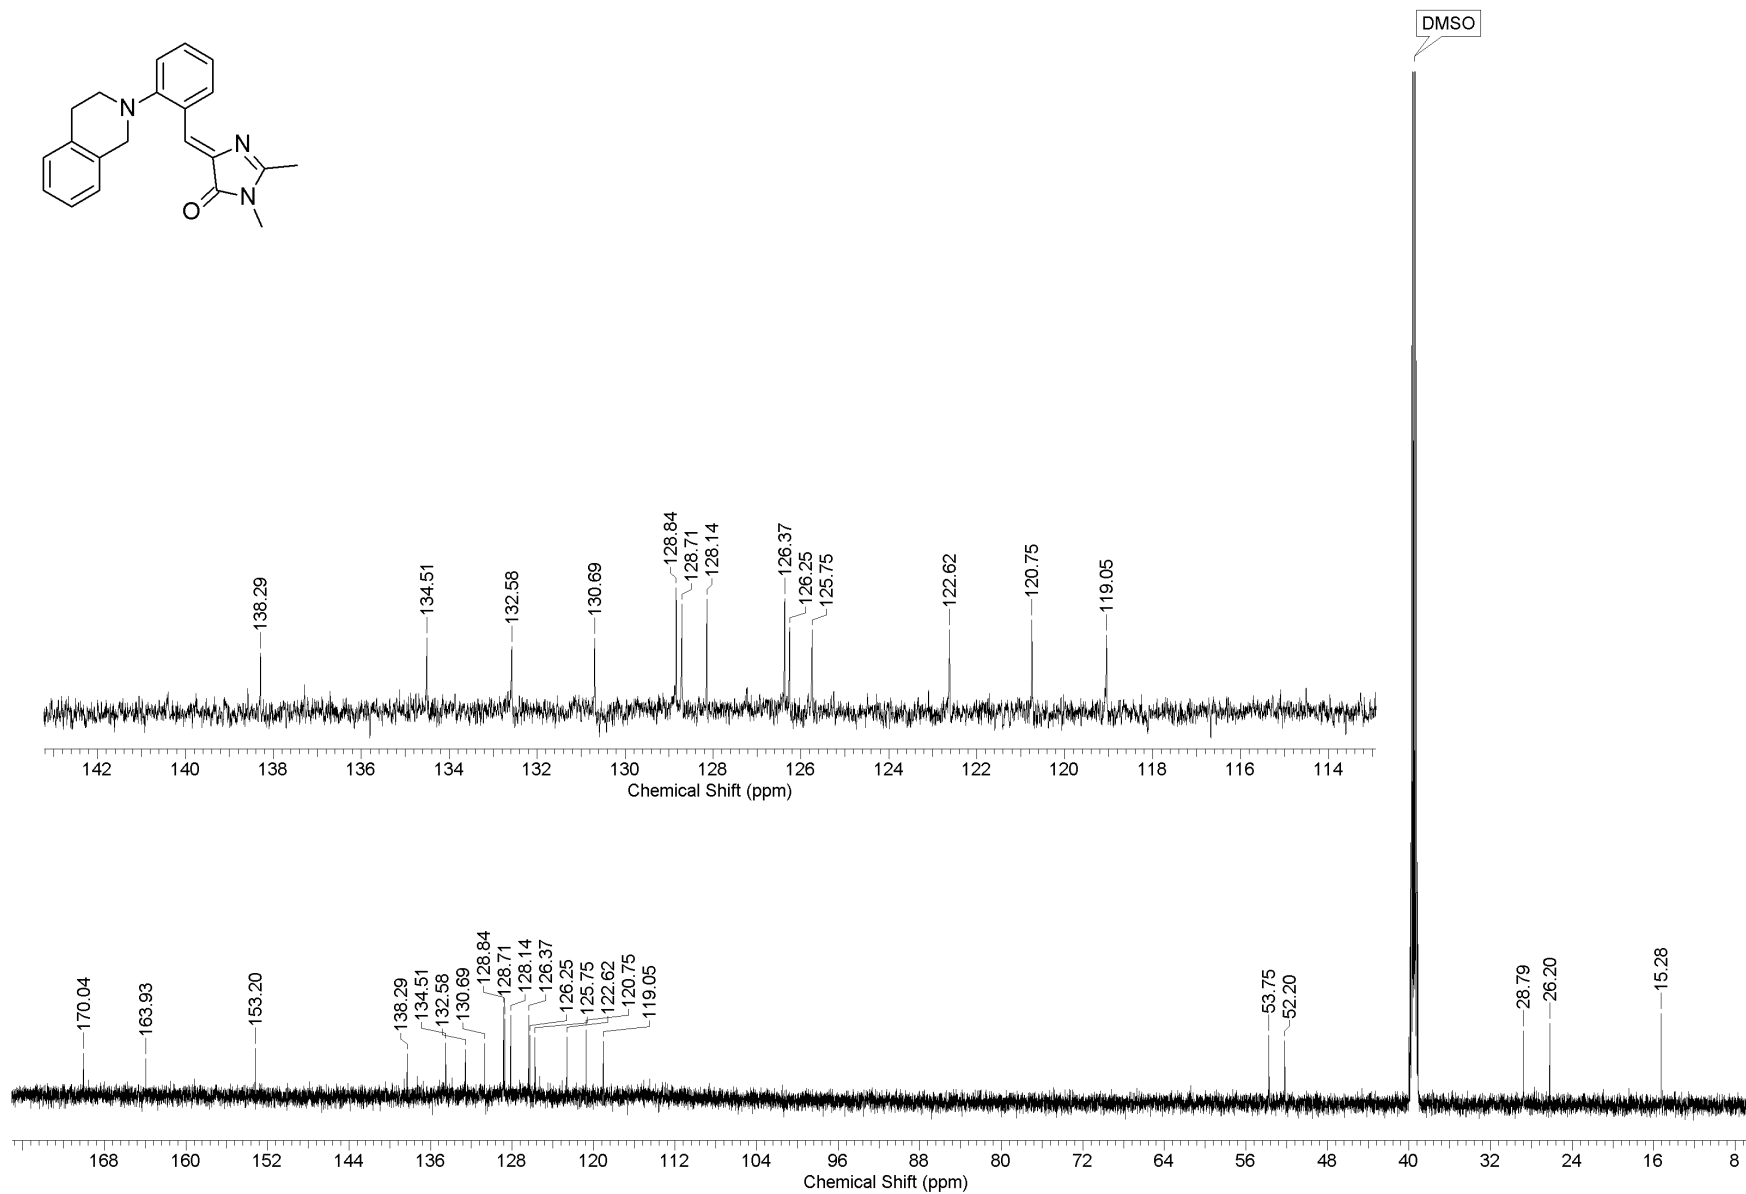

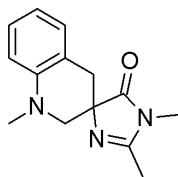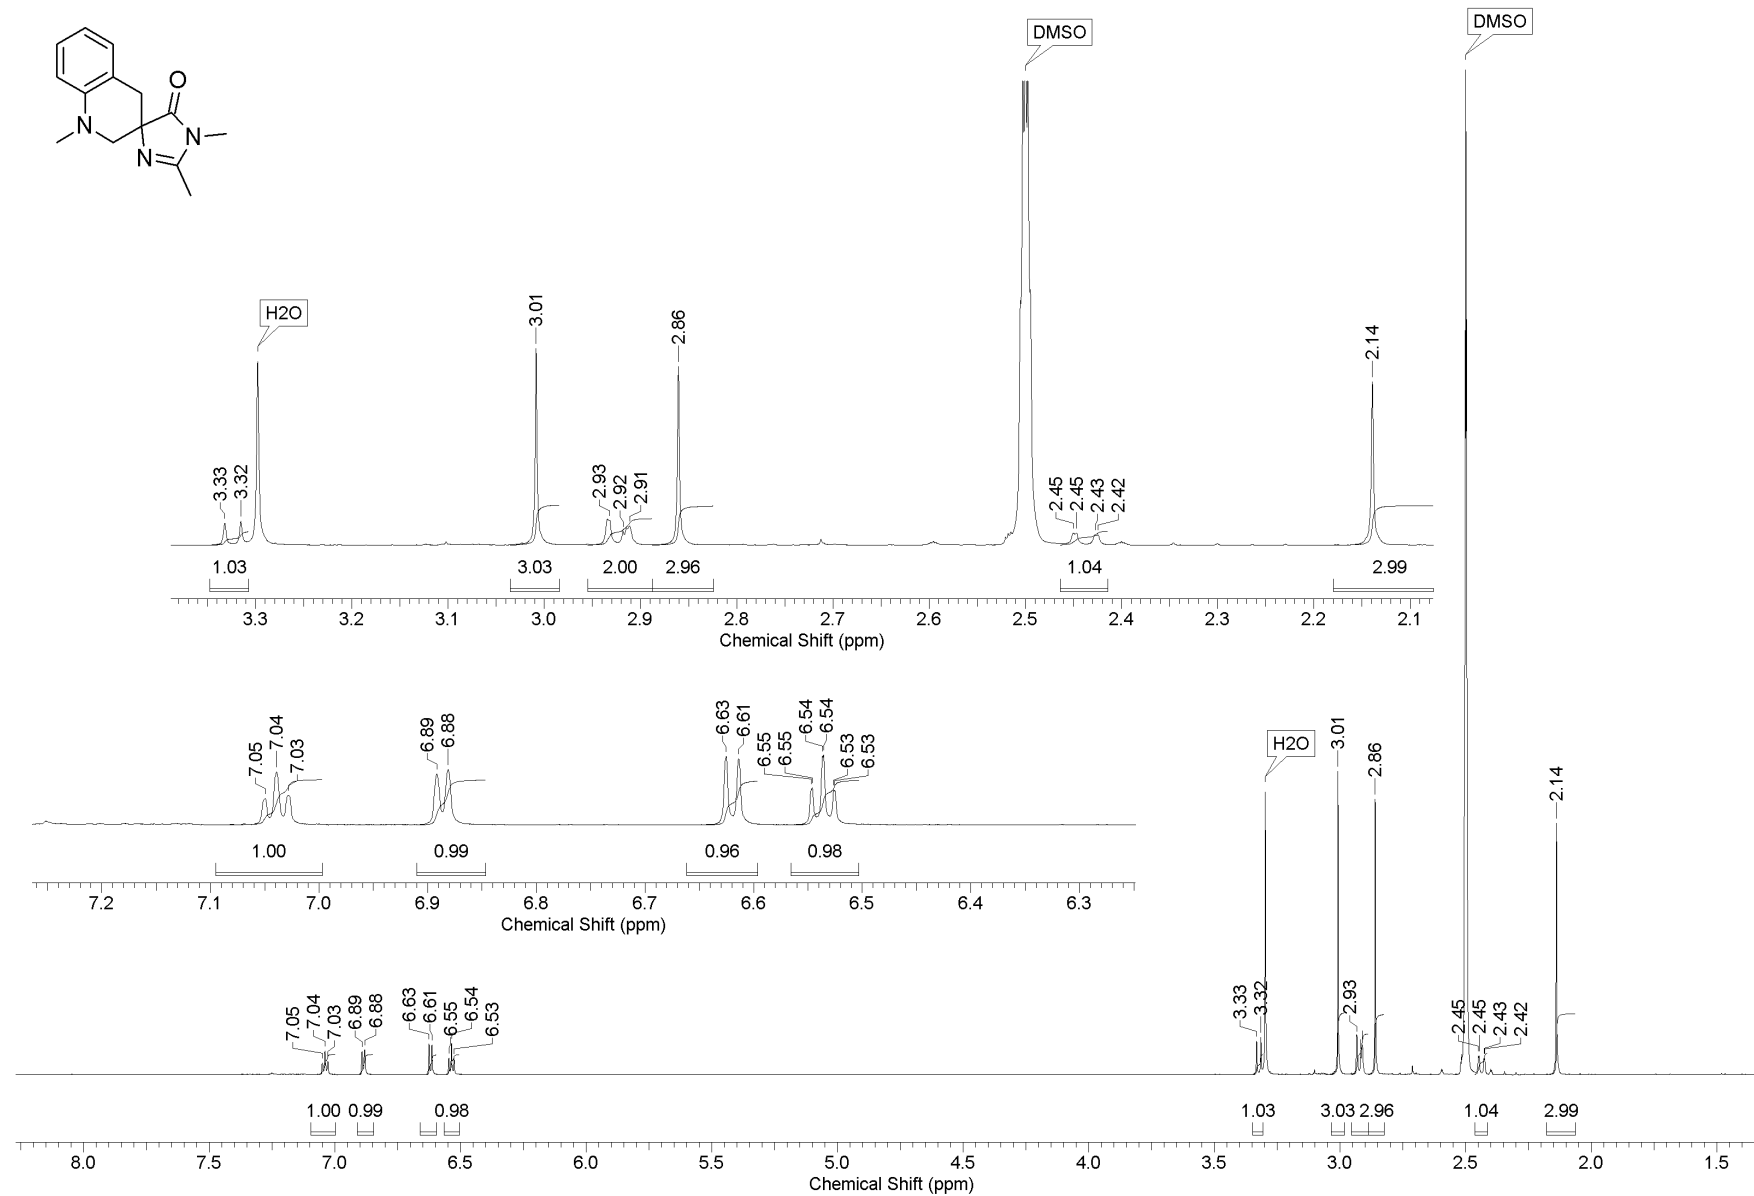

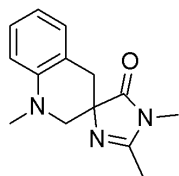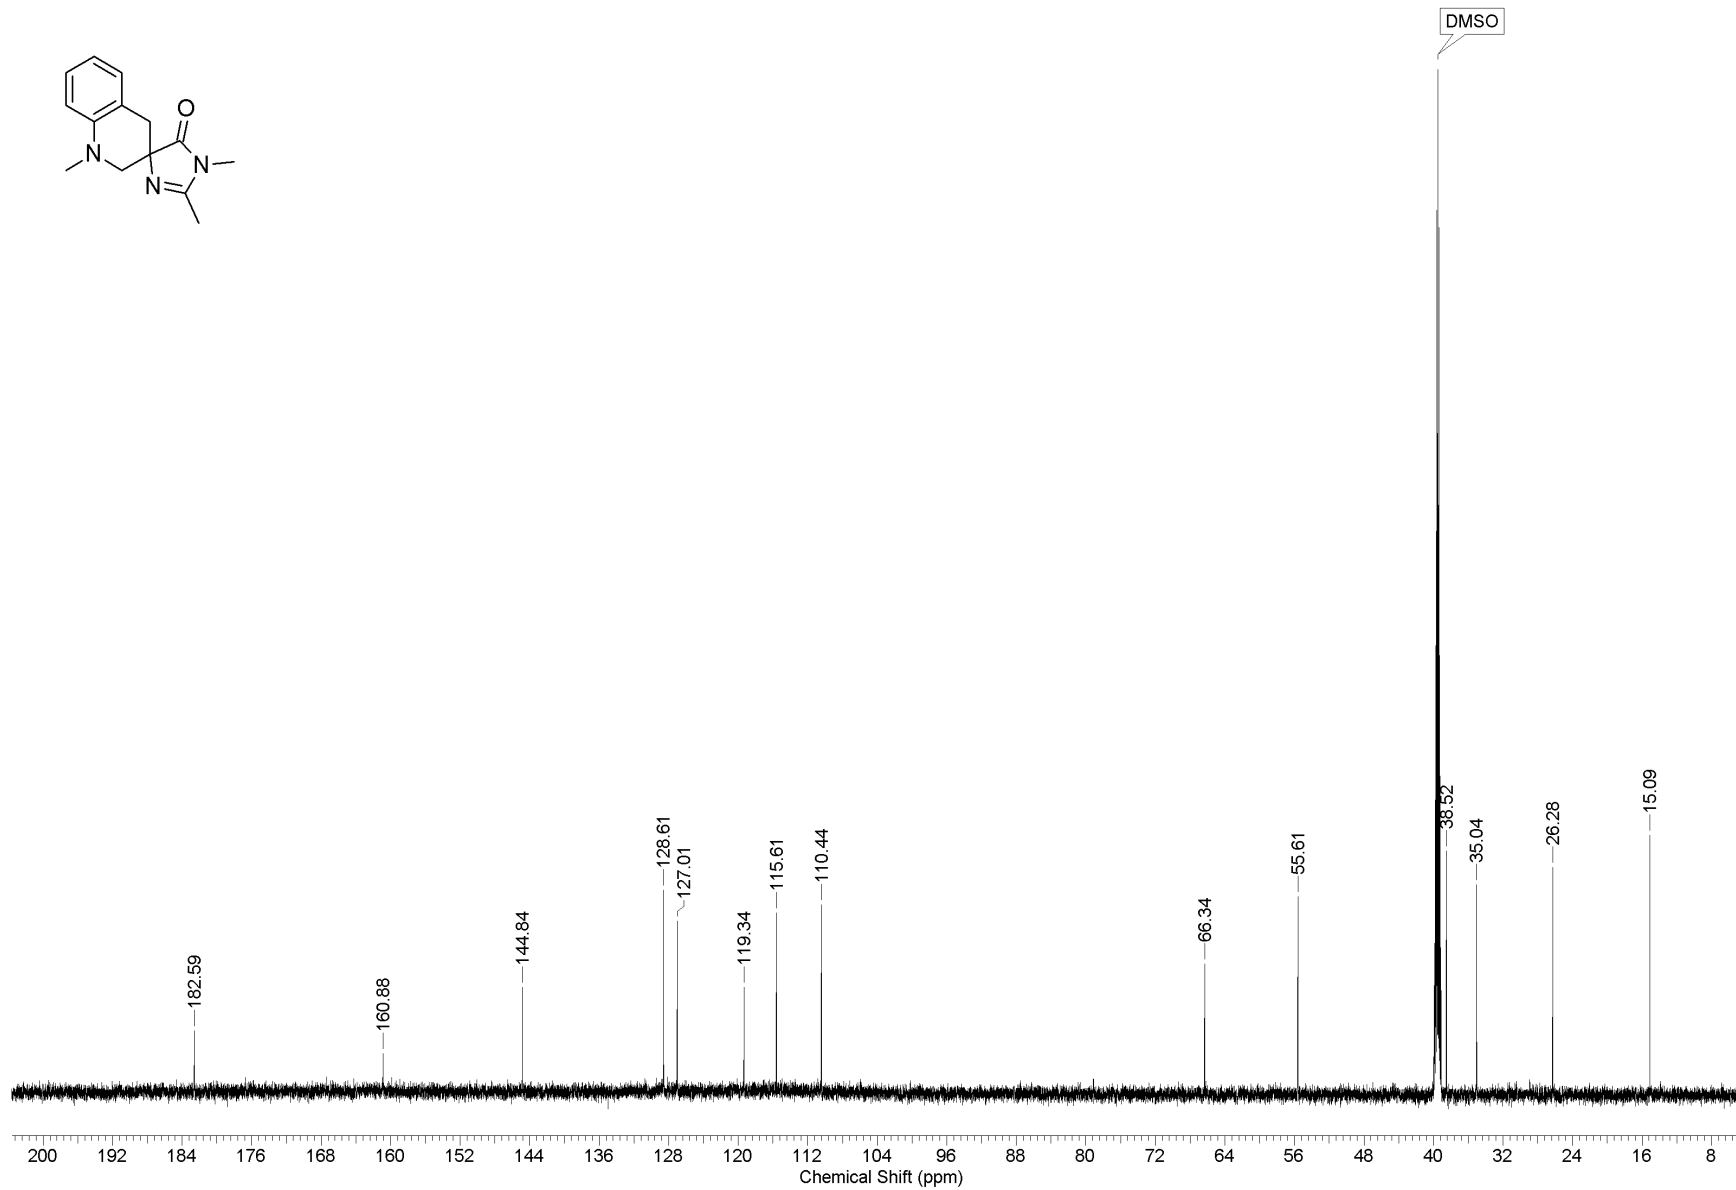

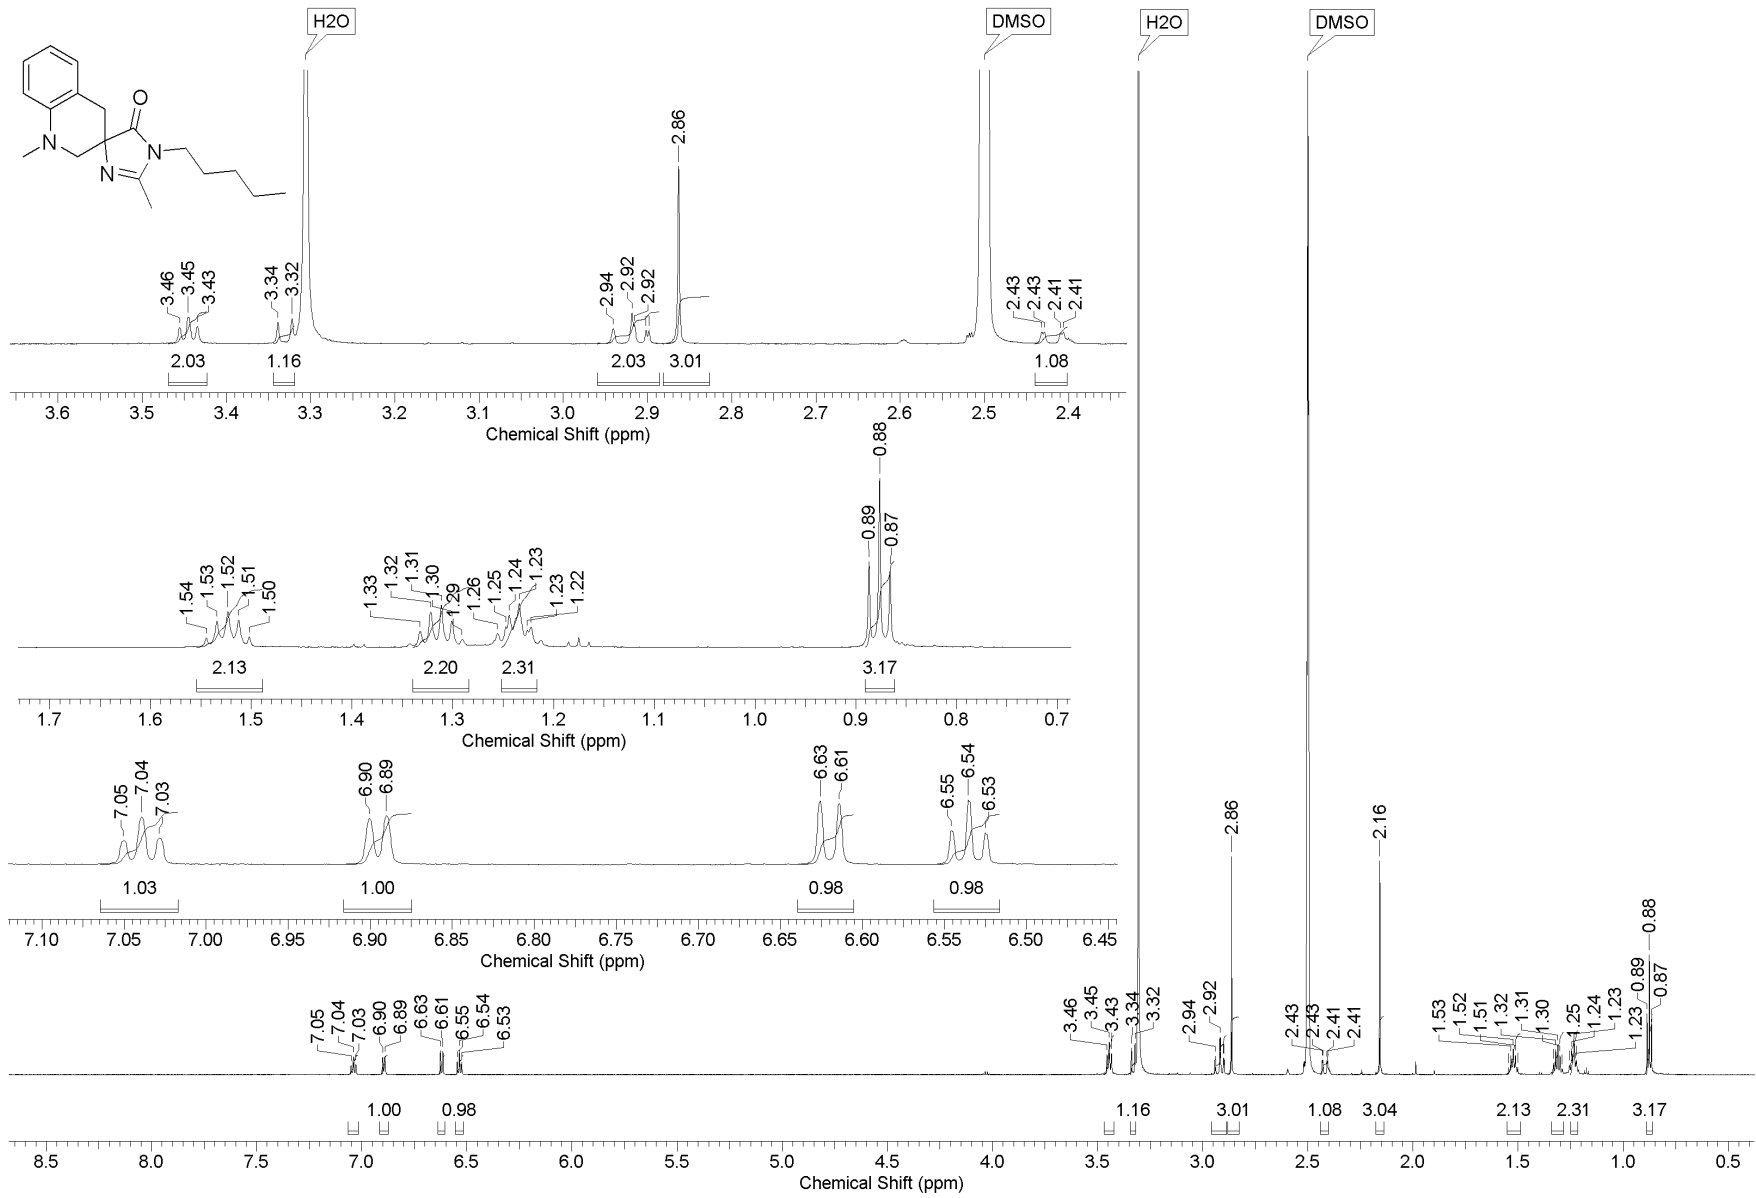

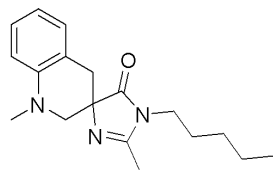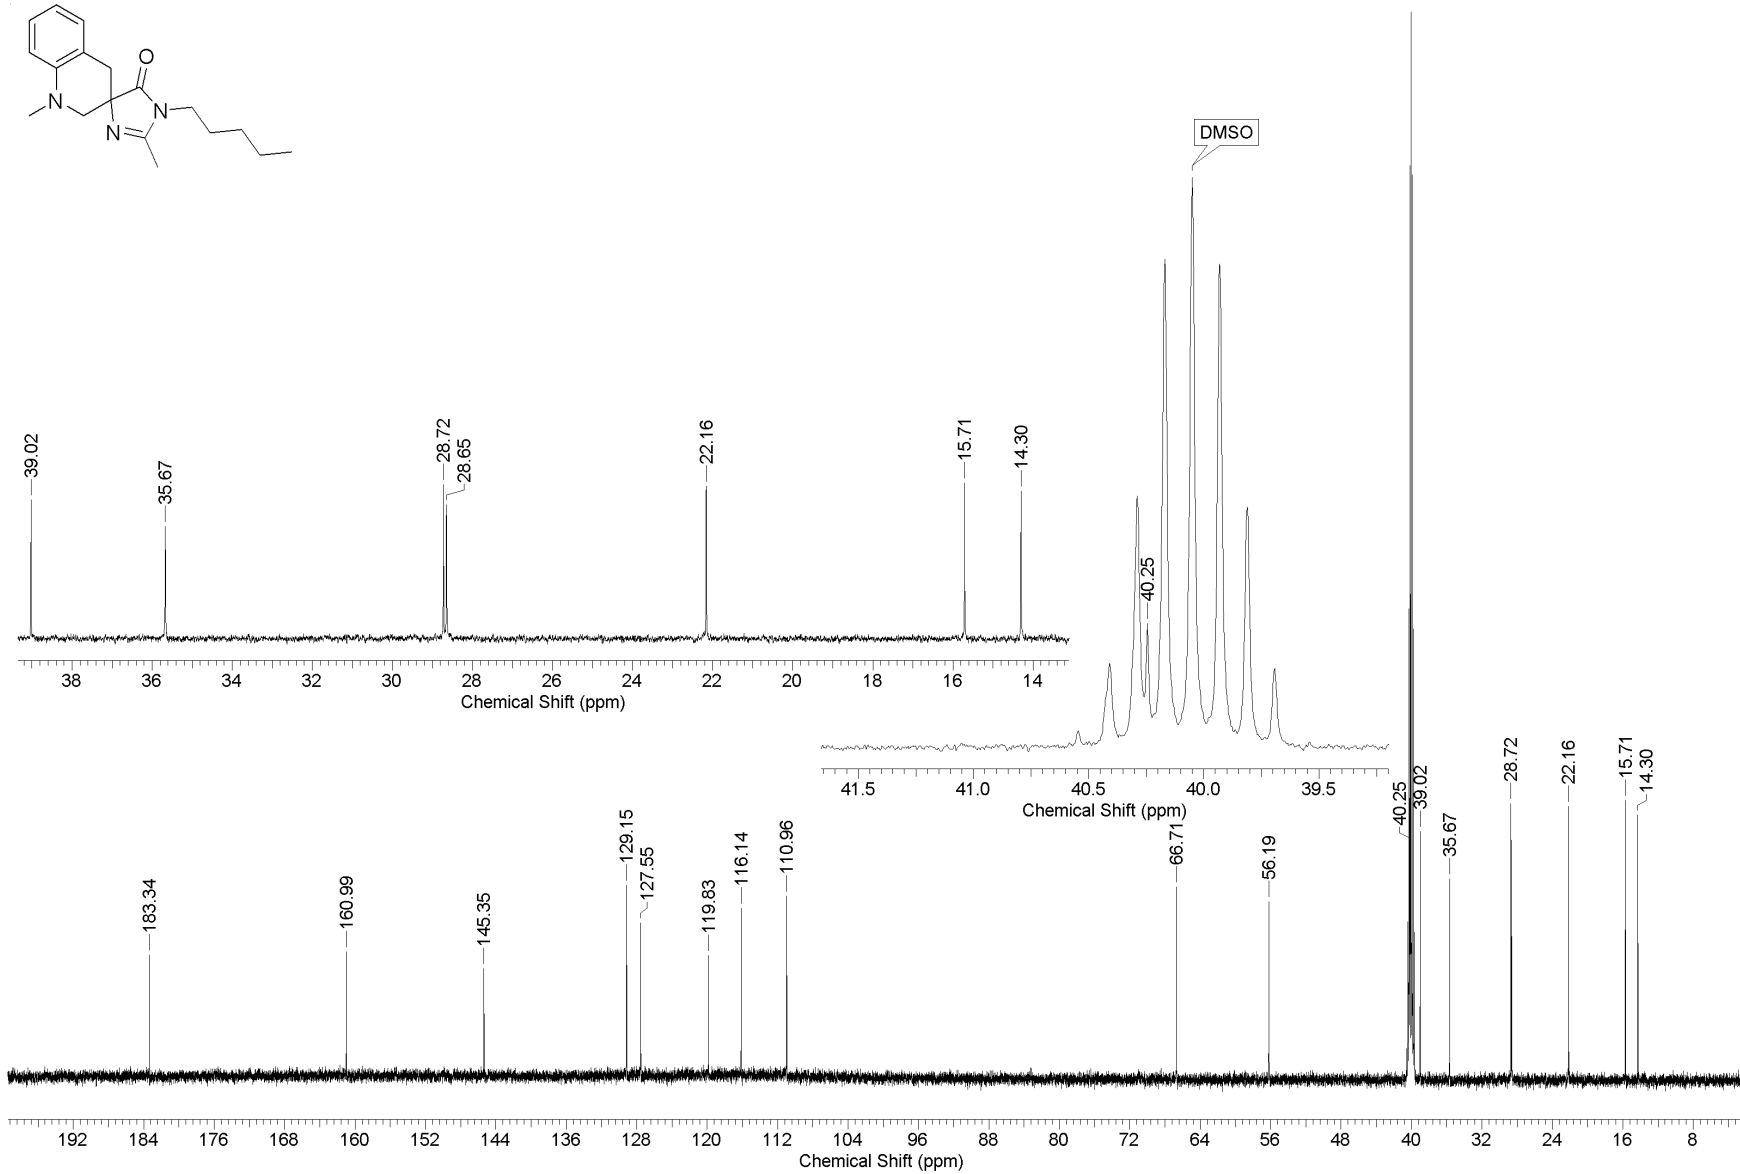



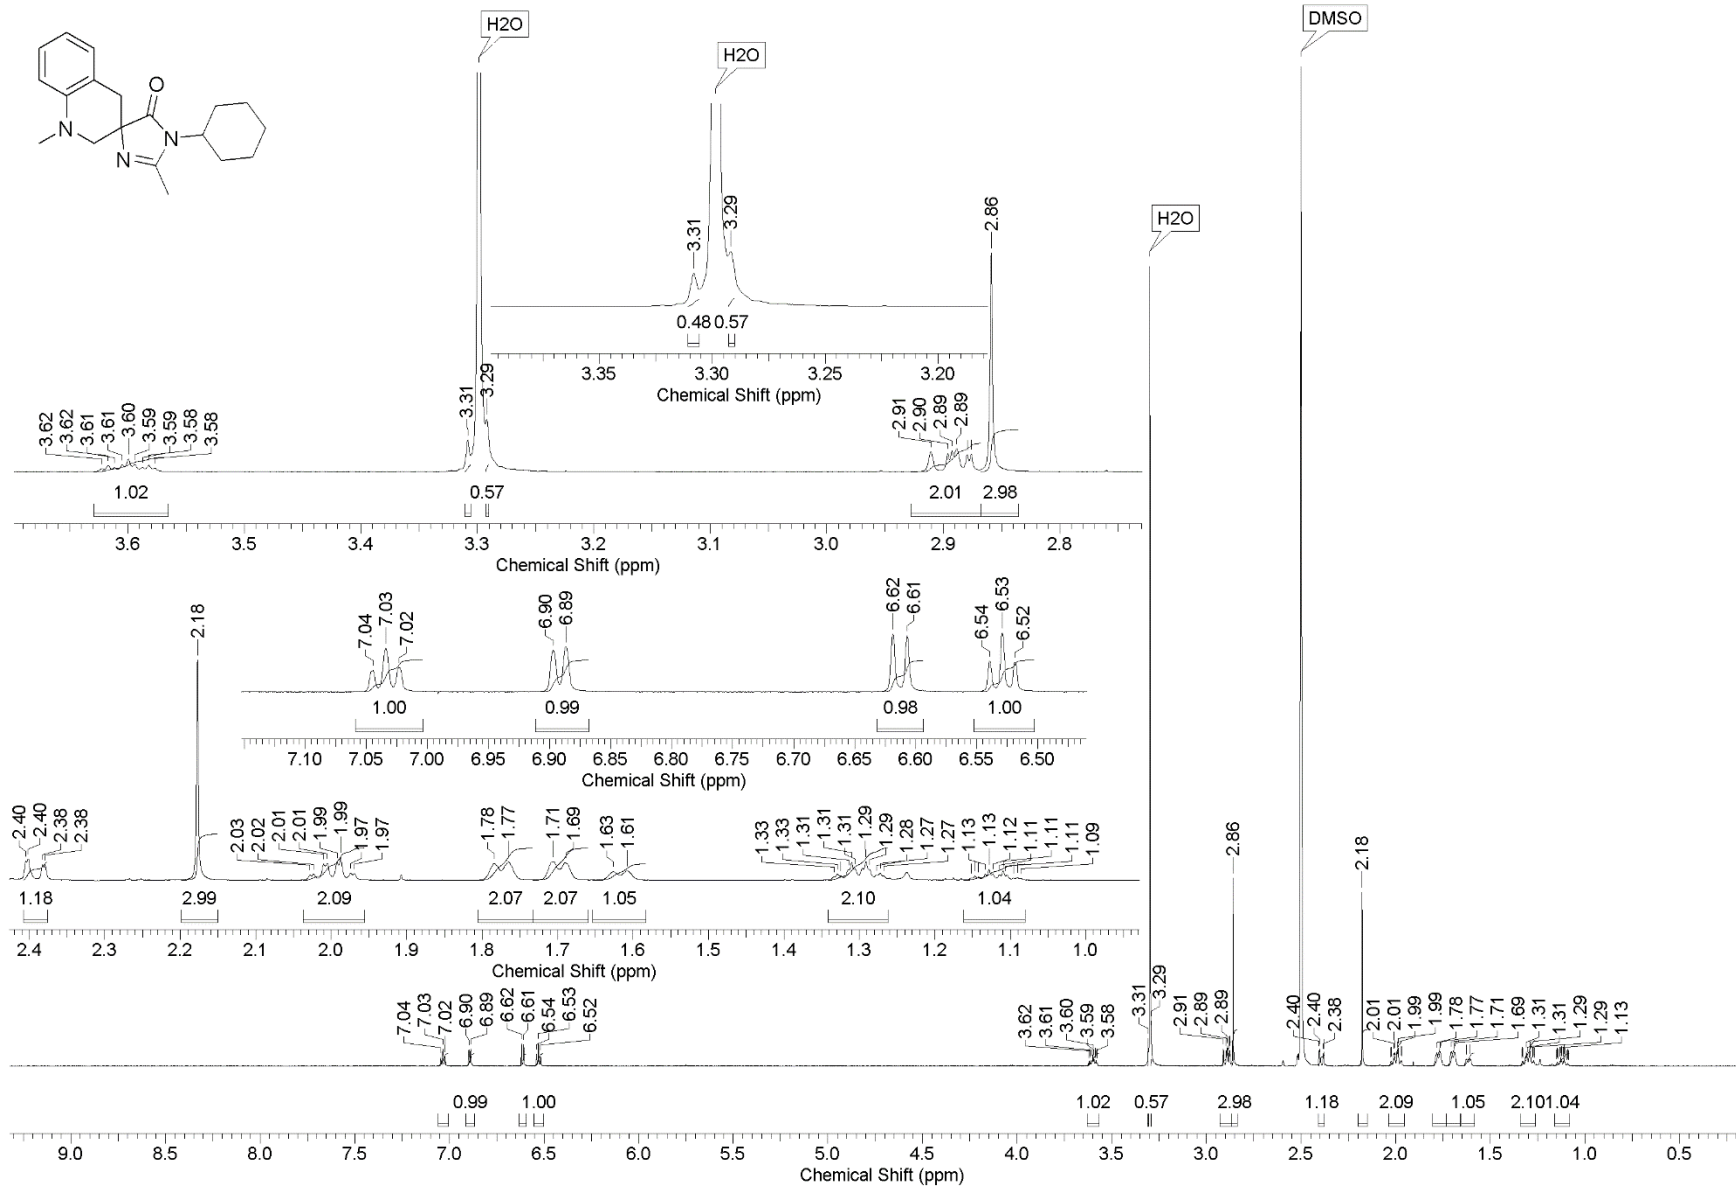

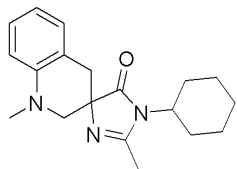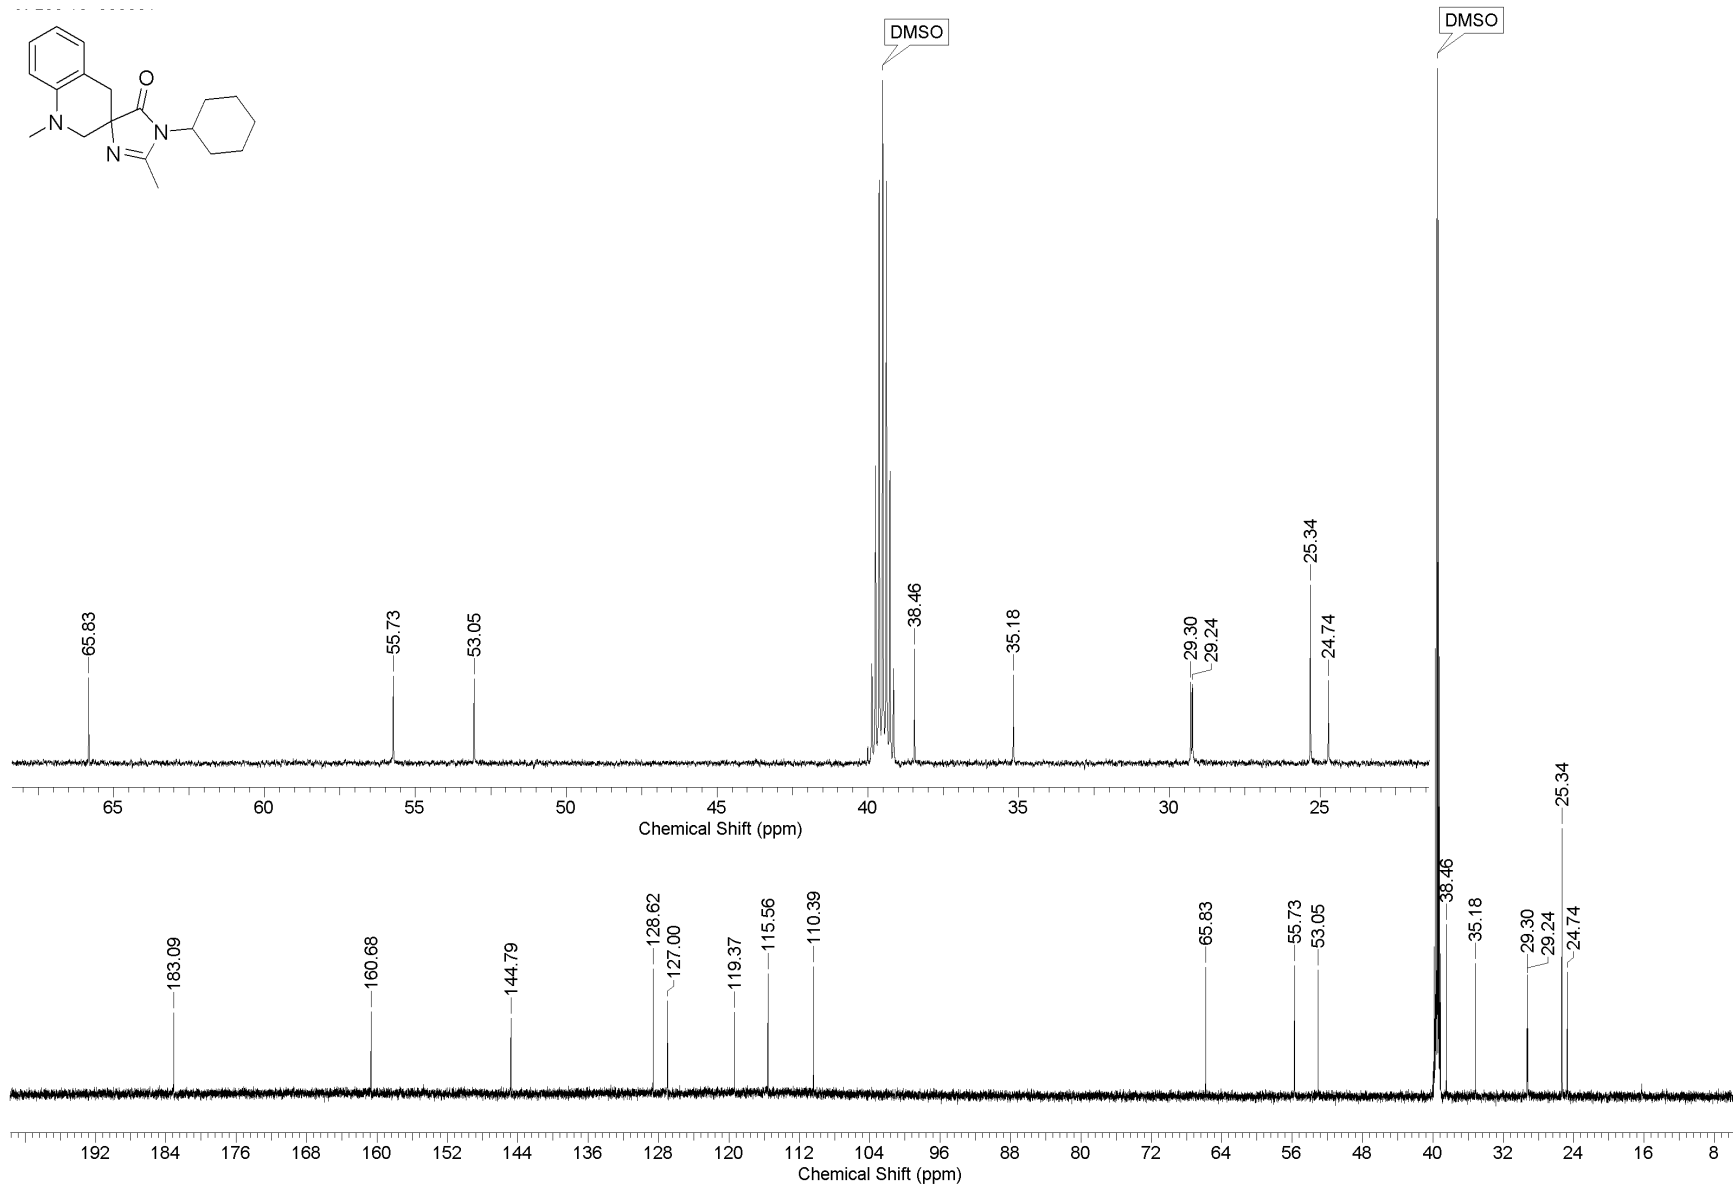

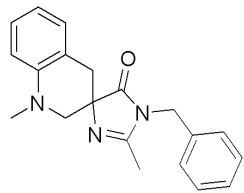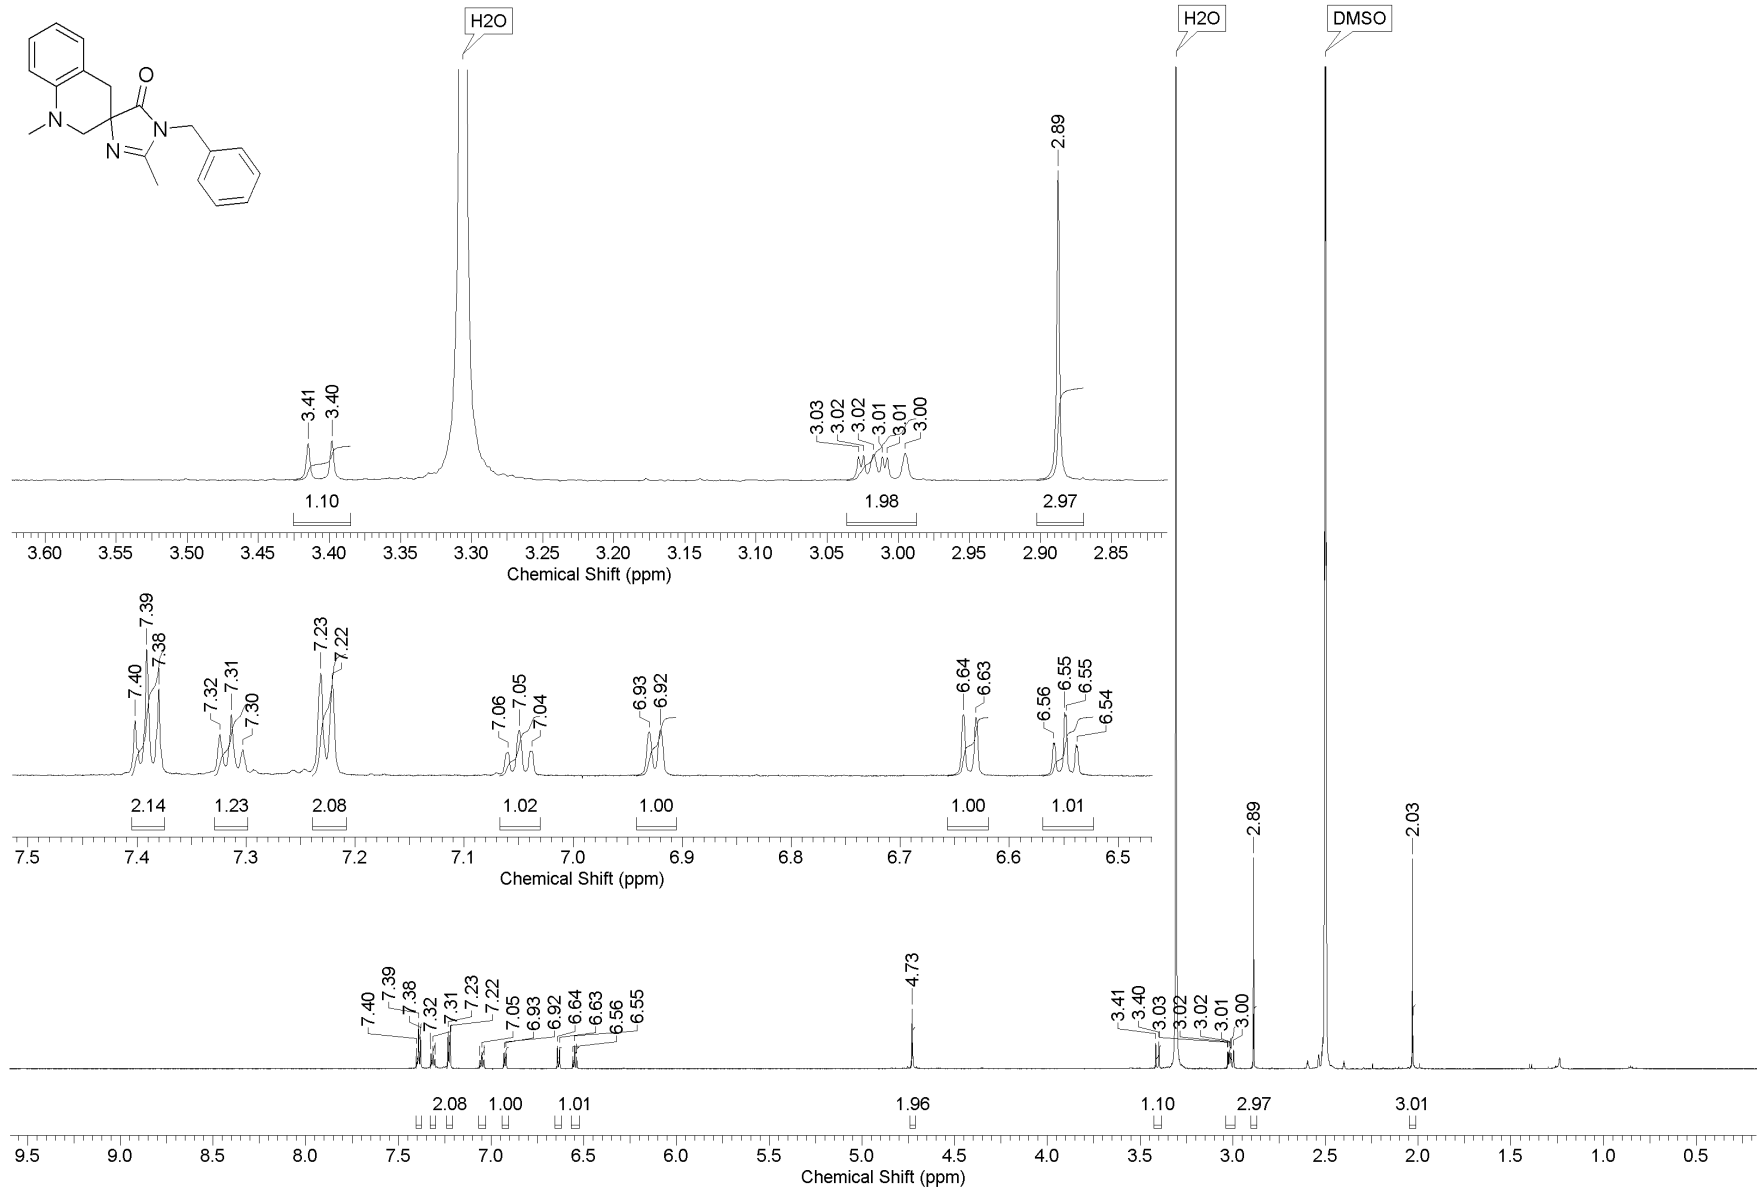

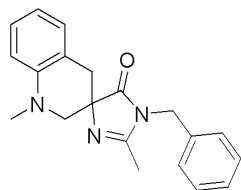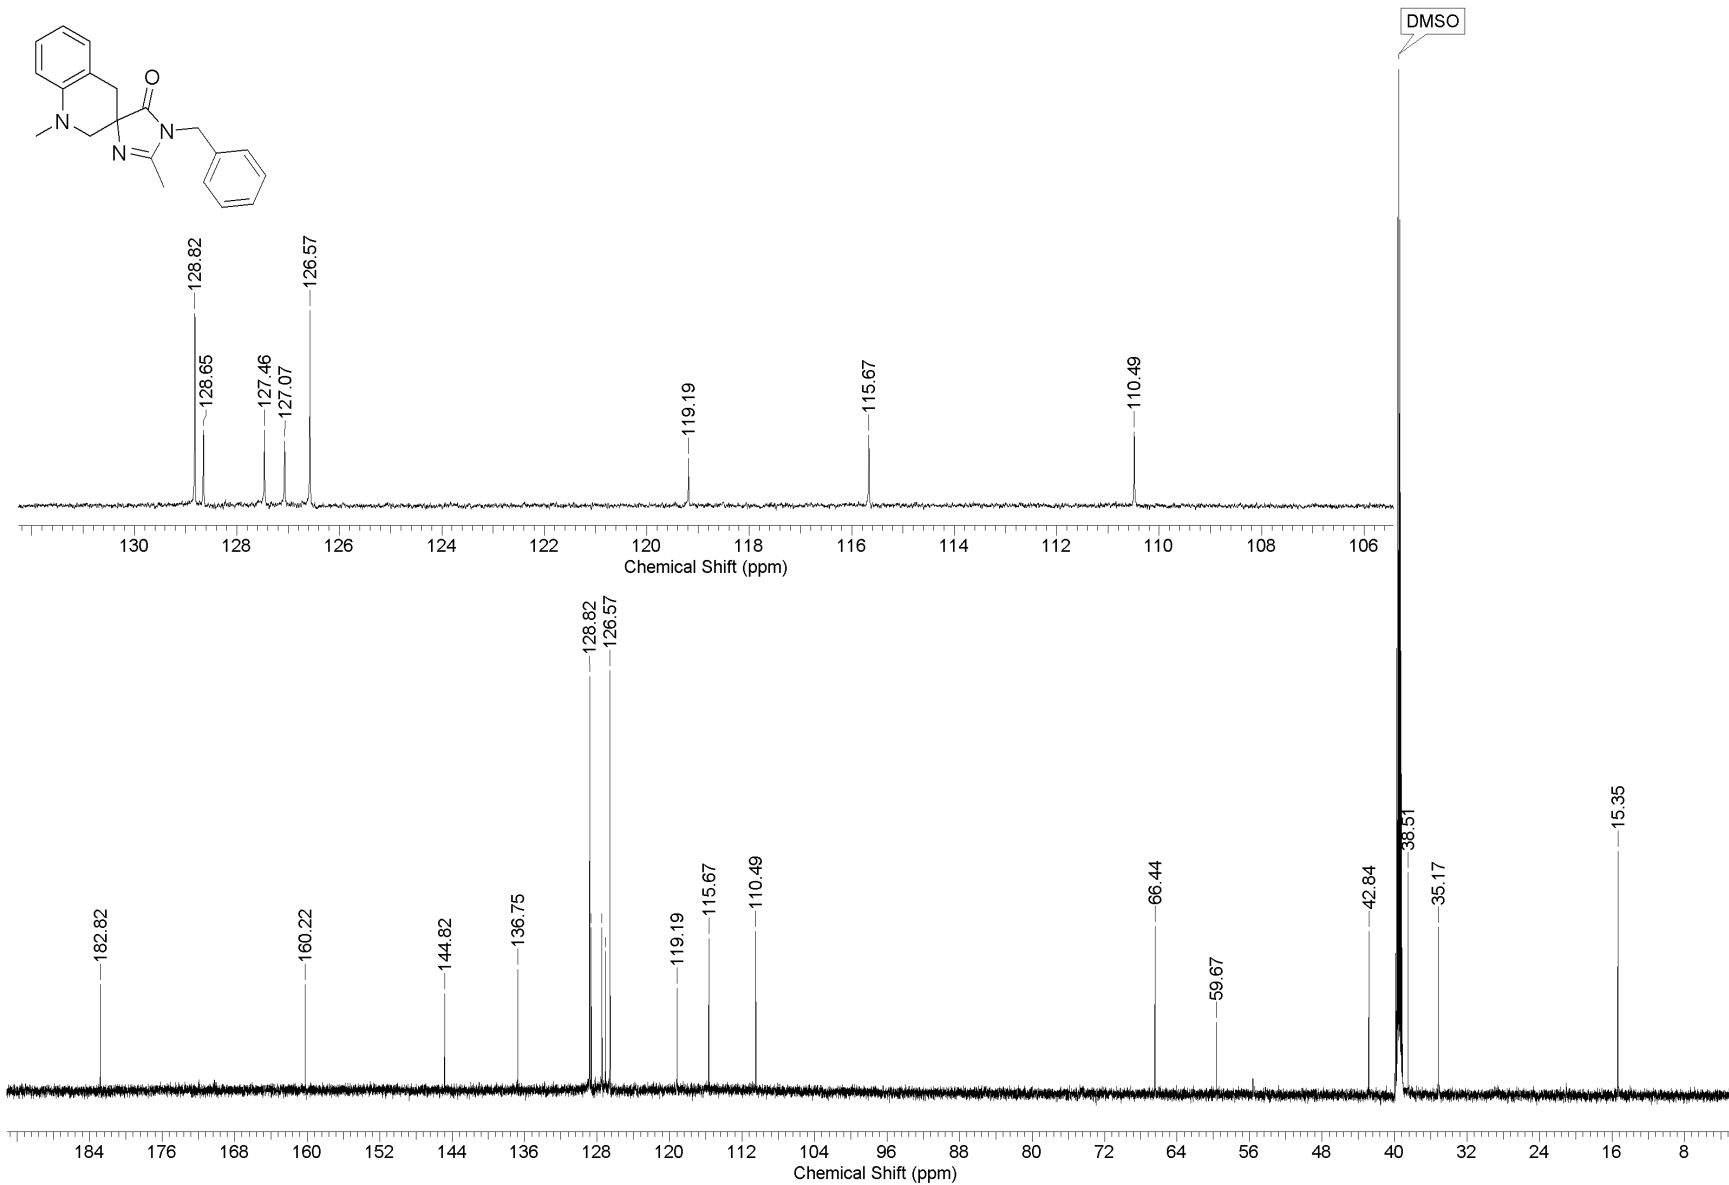

S100

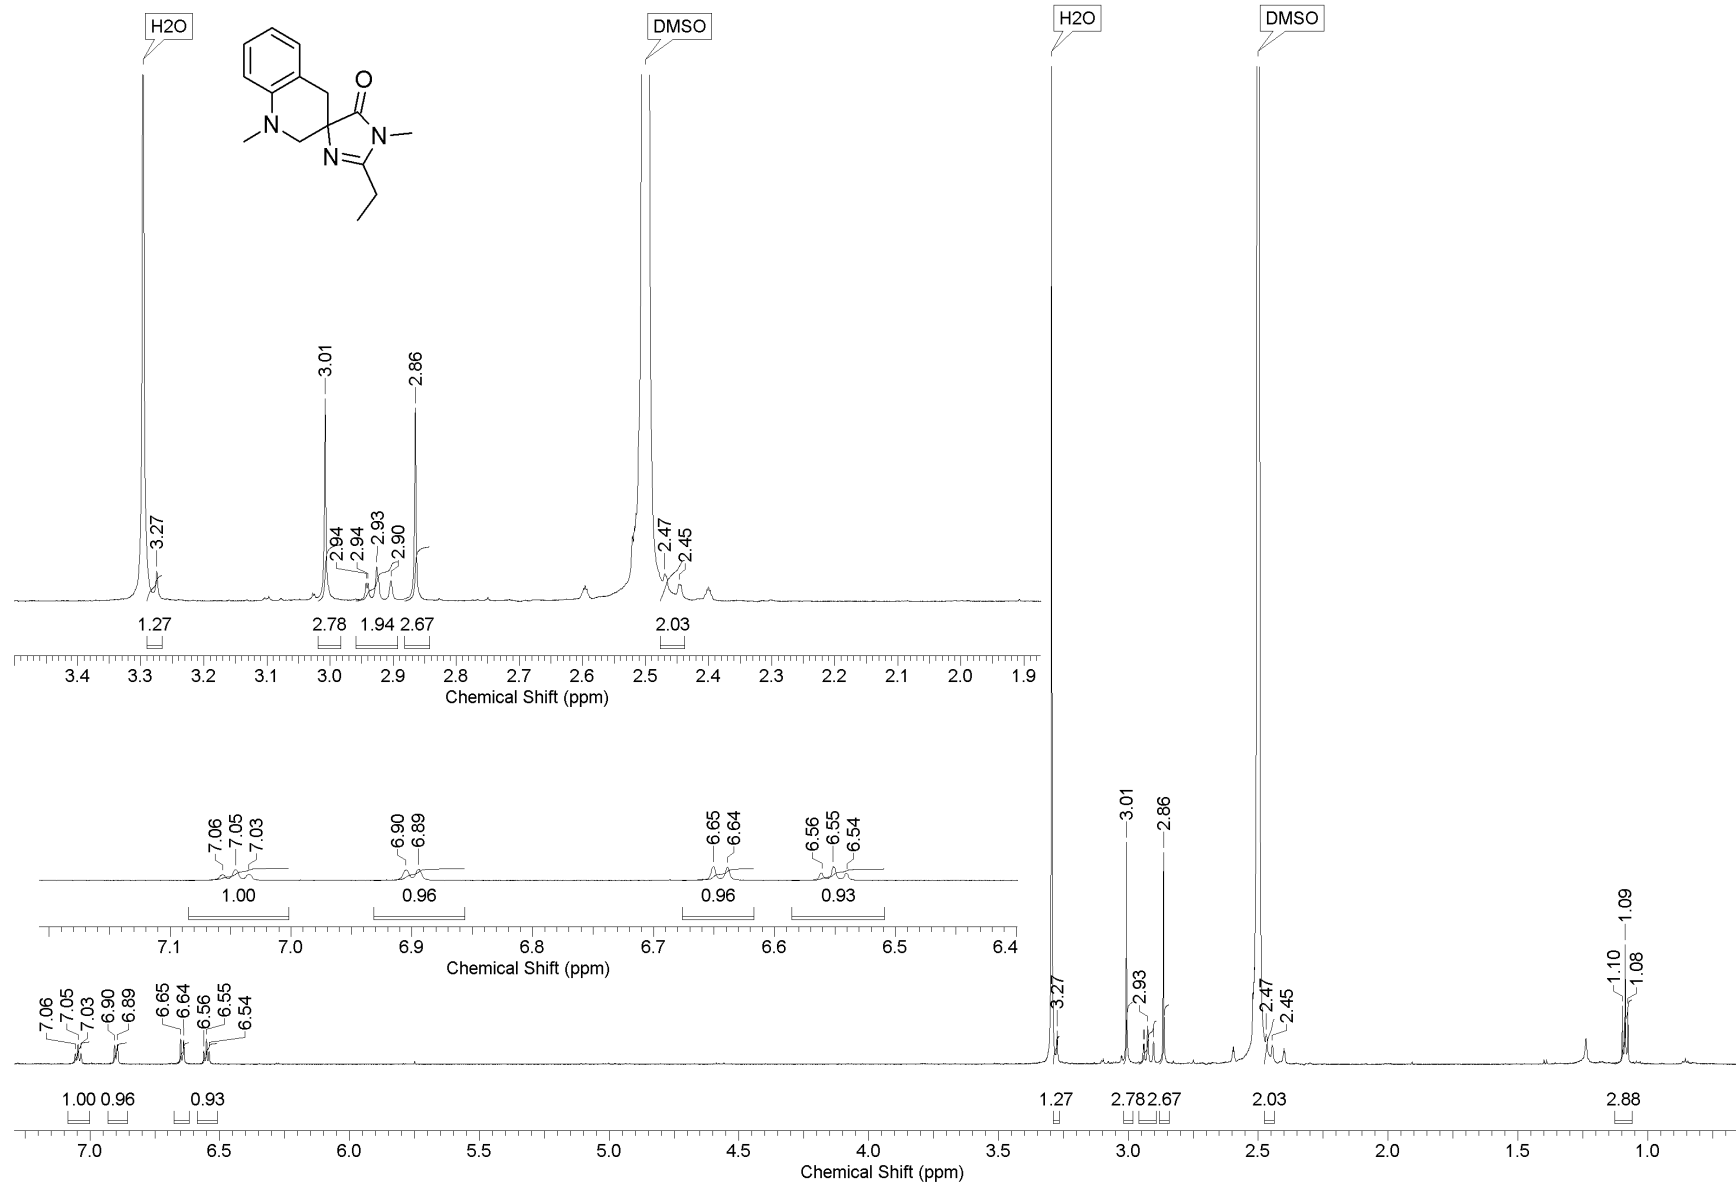

S101

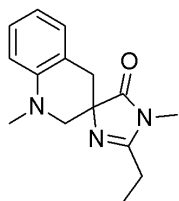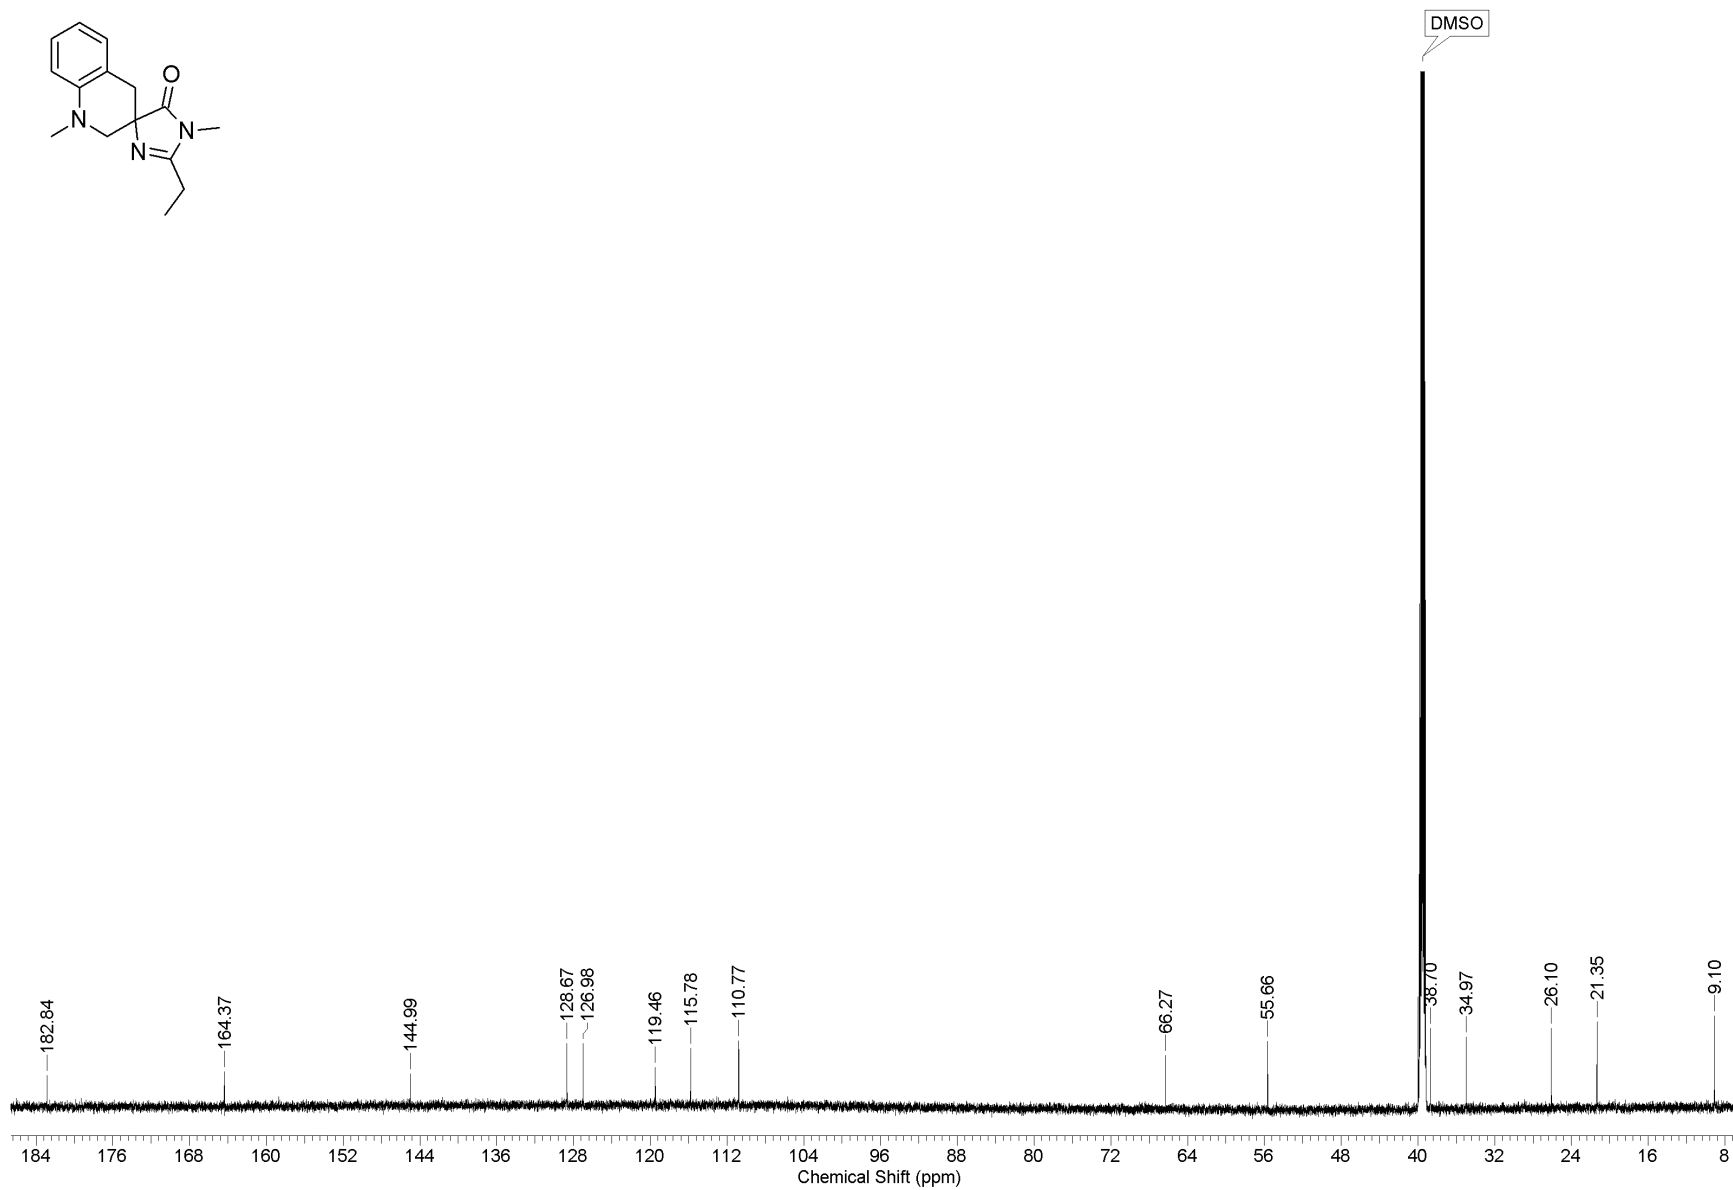

S102

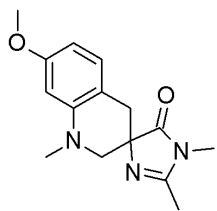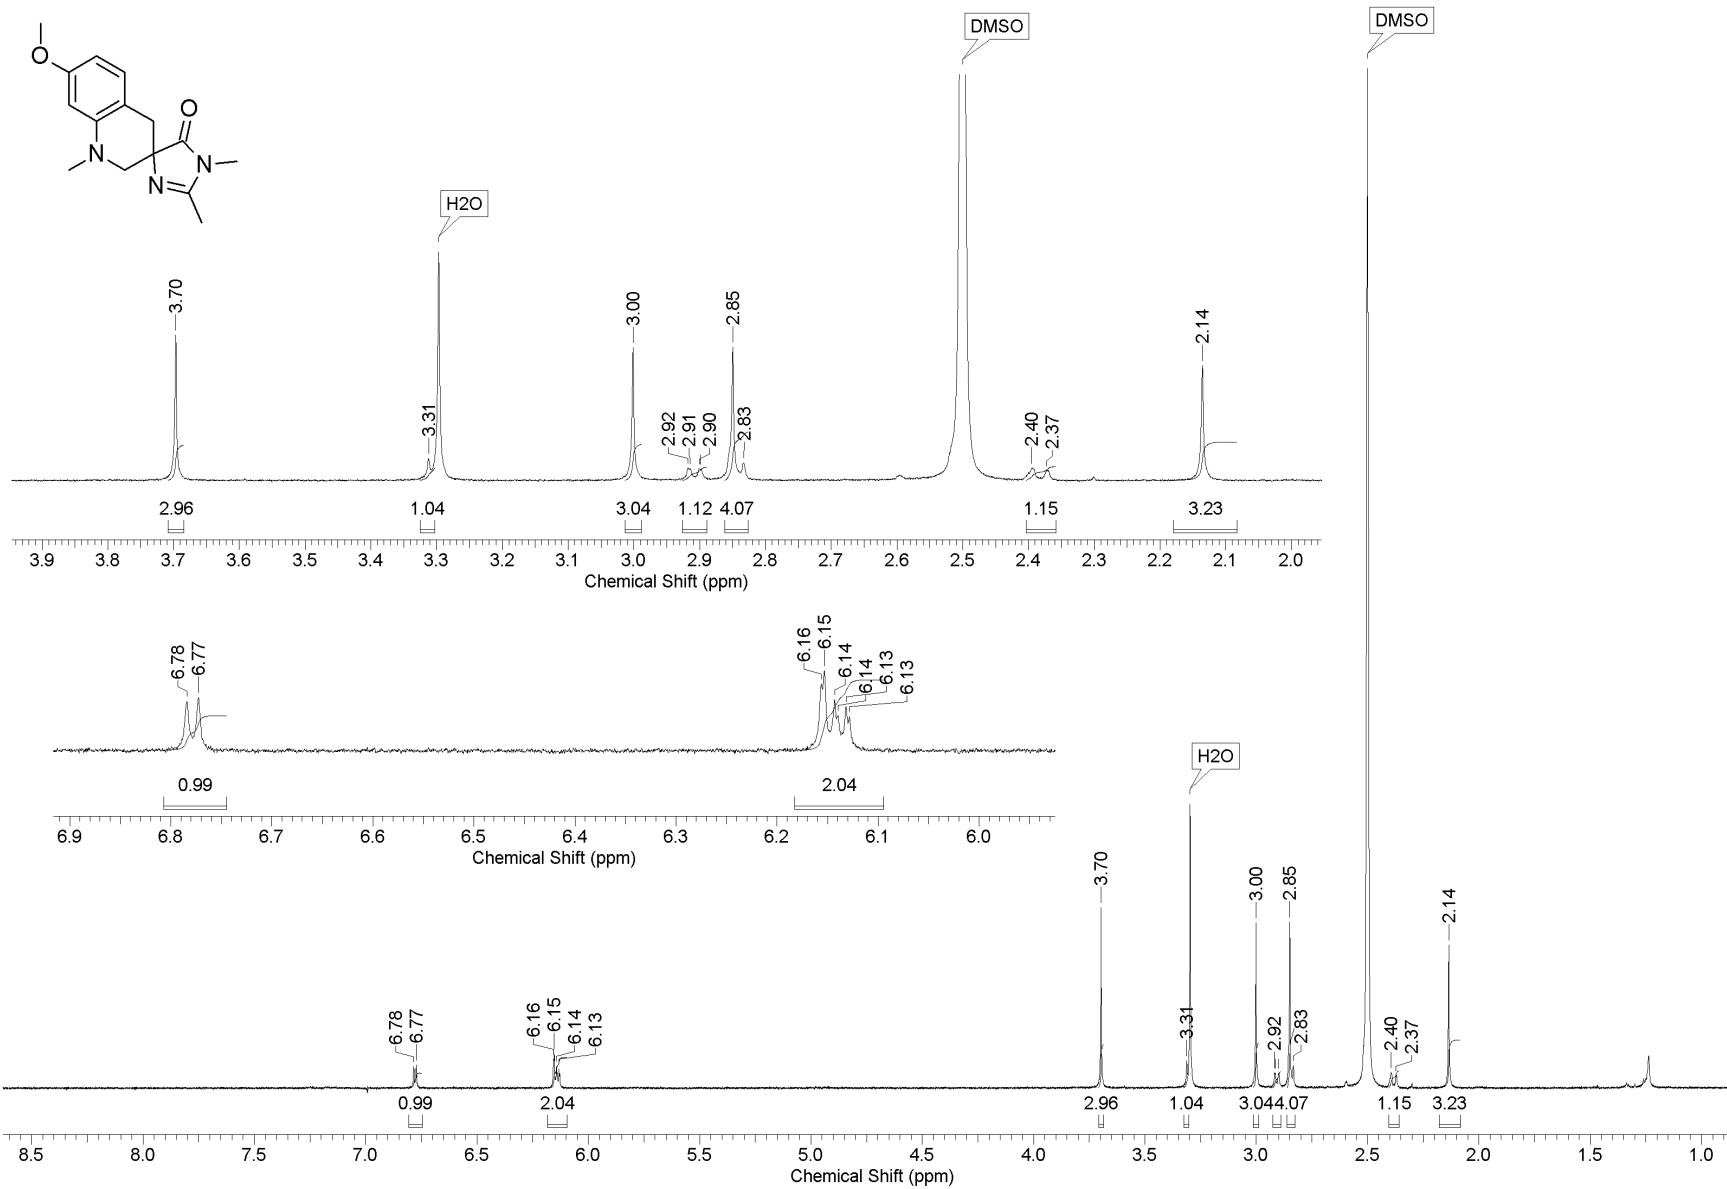

S103

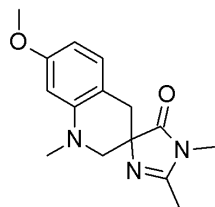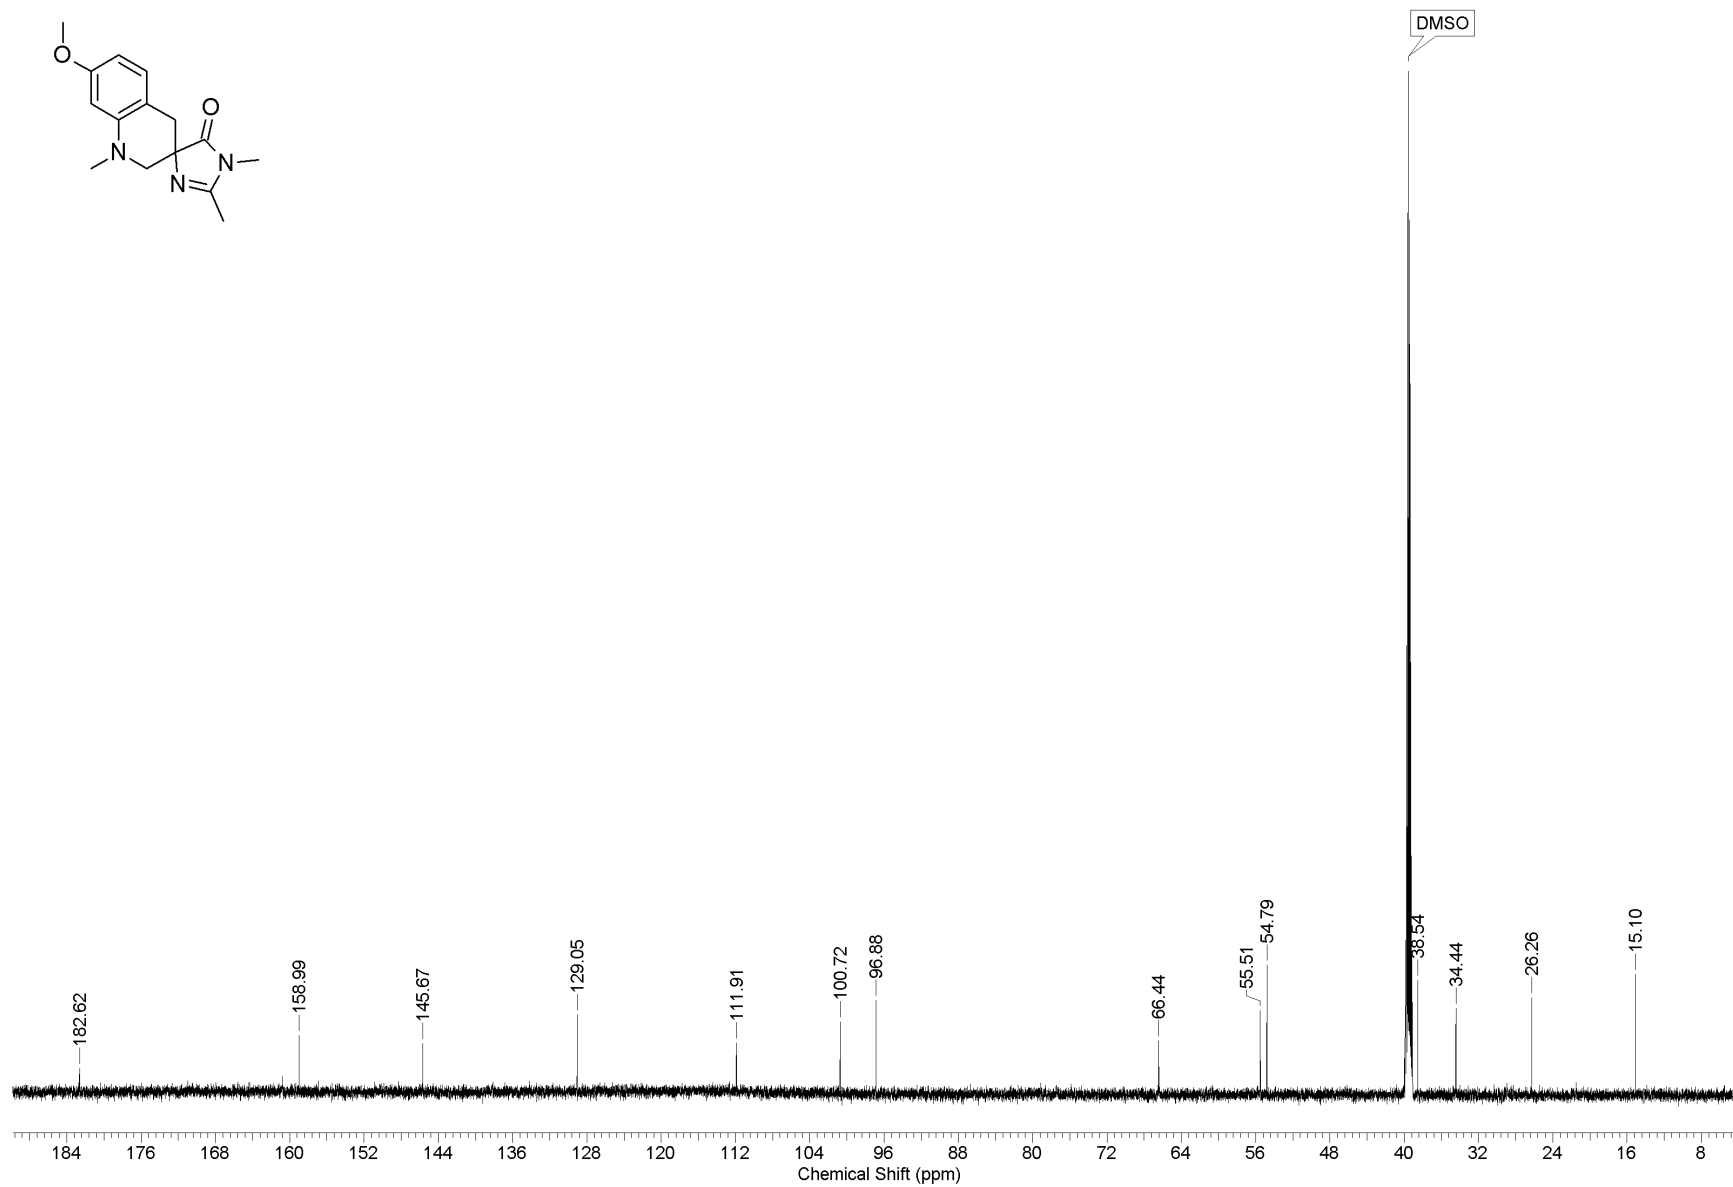

S104



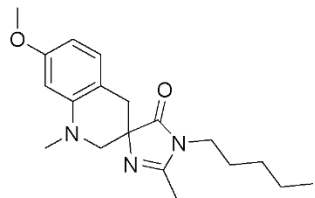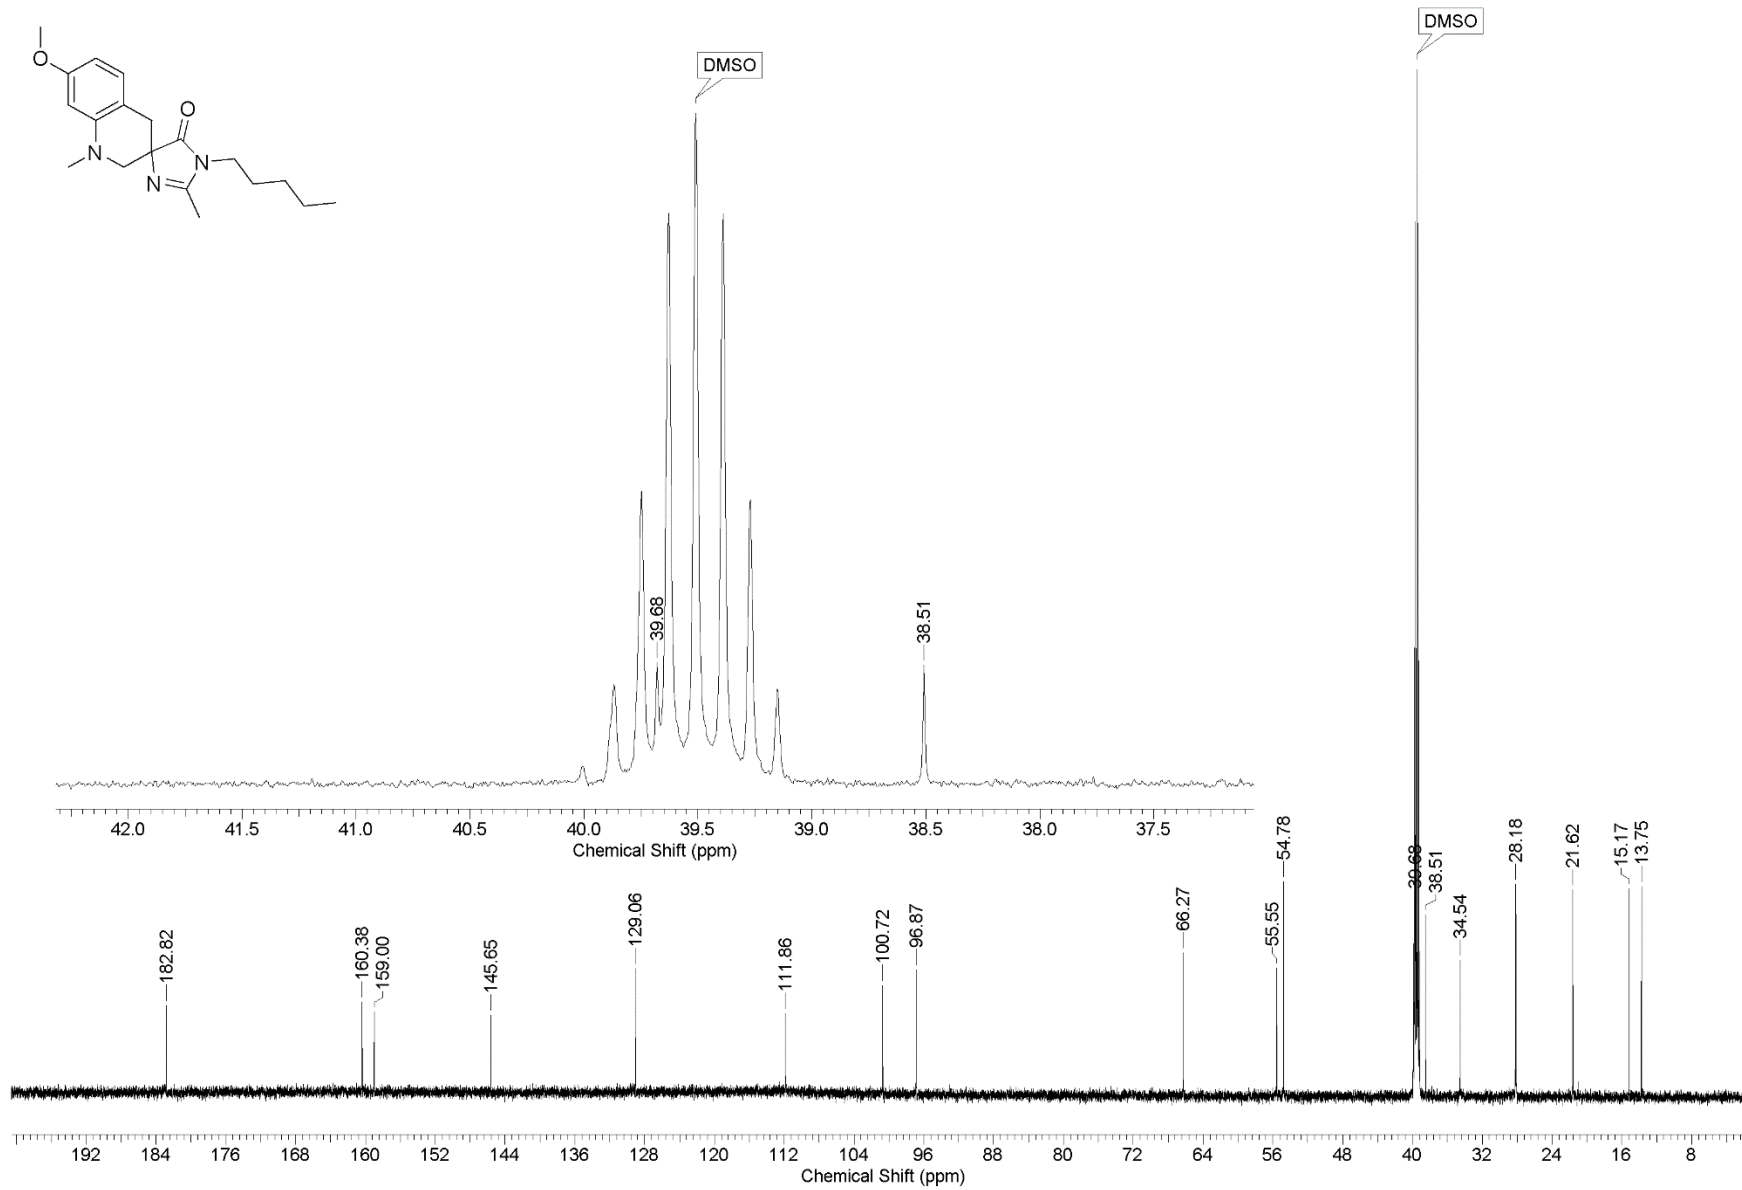

S105

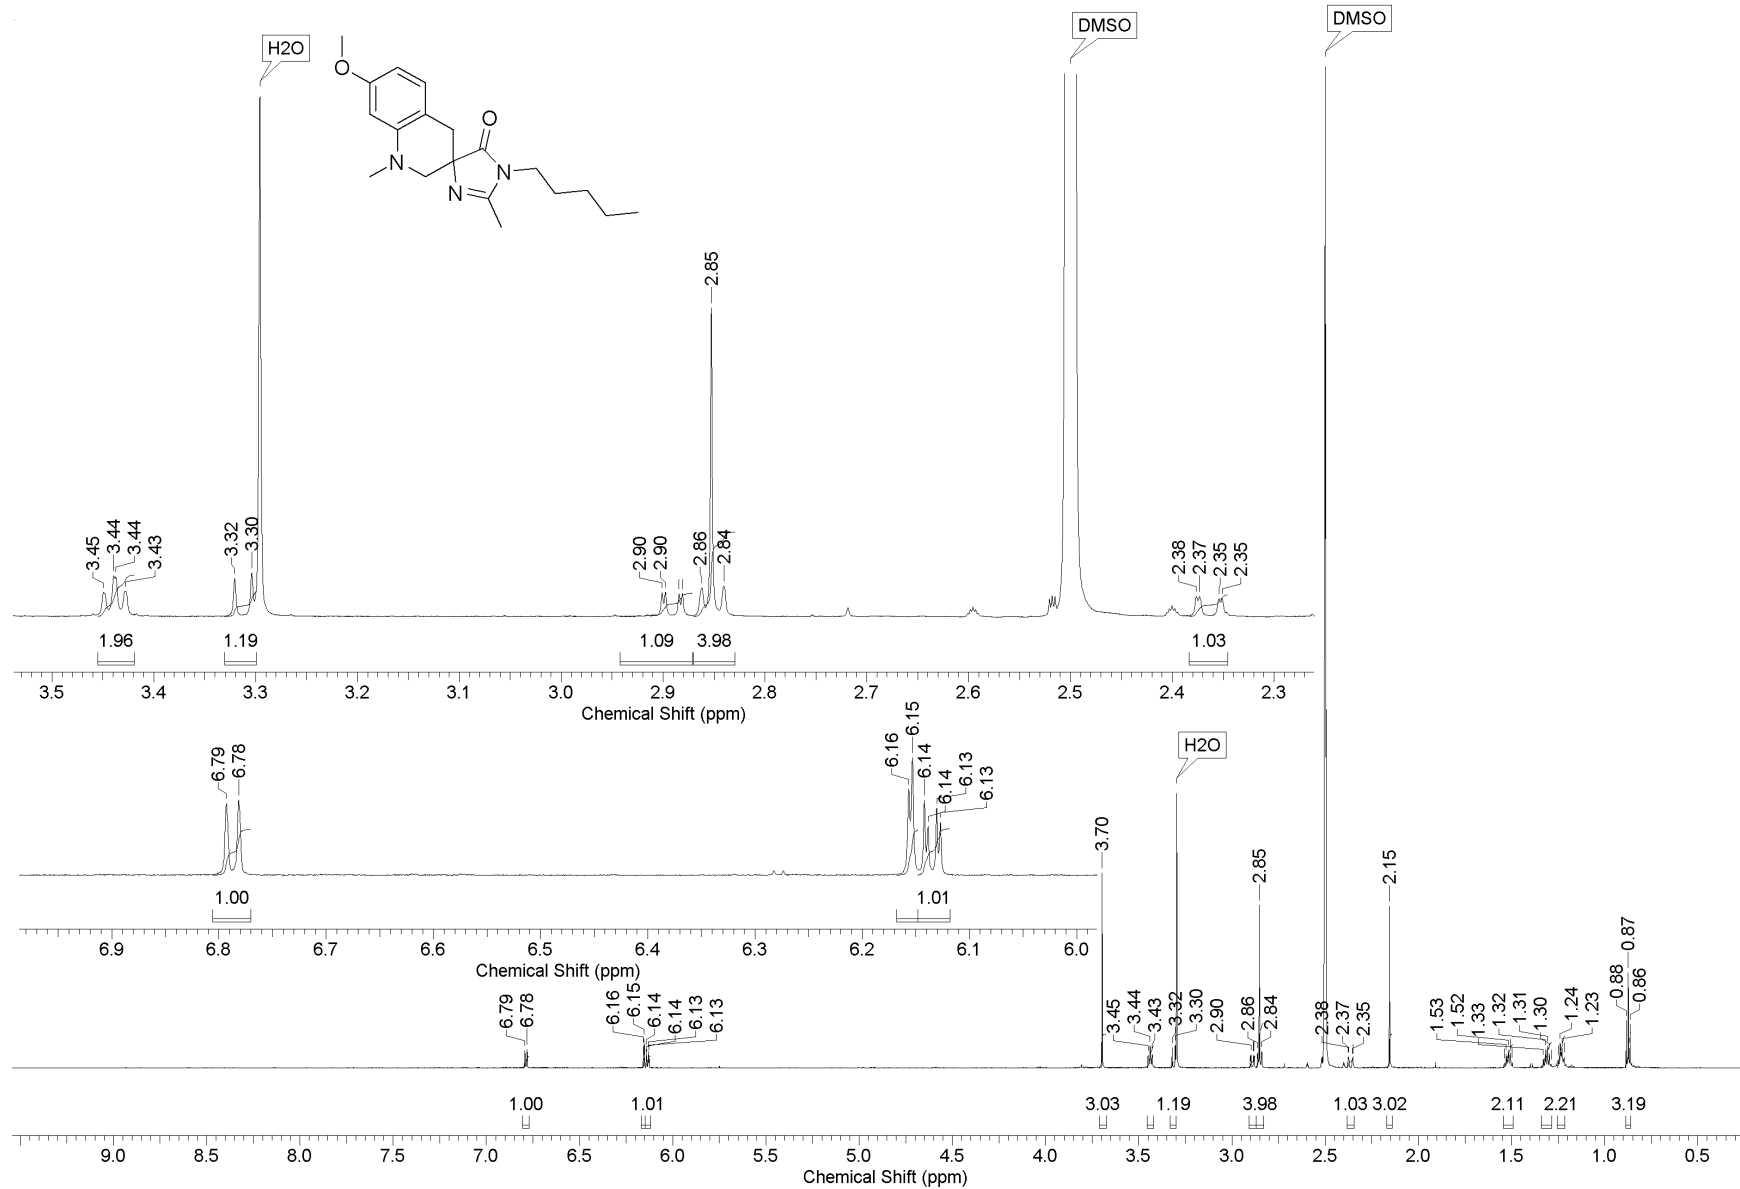

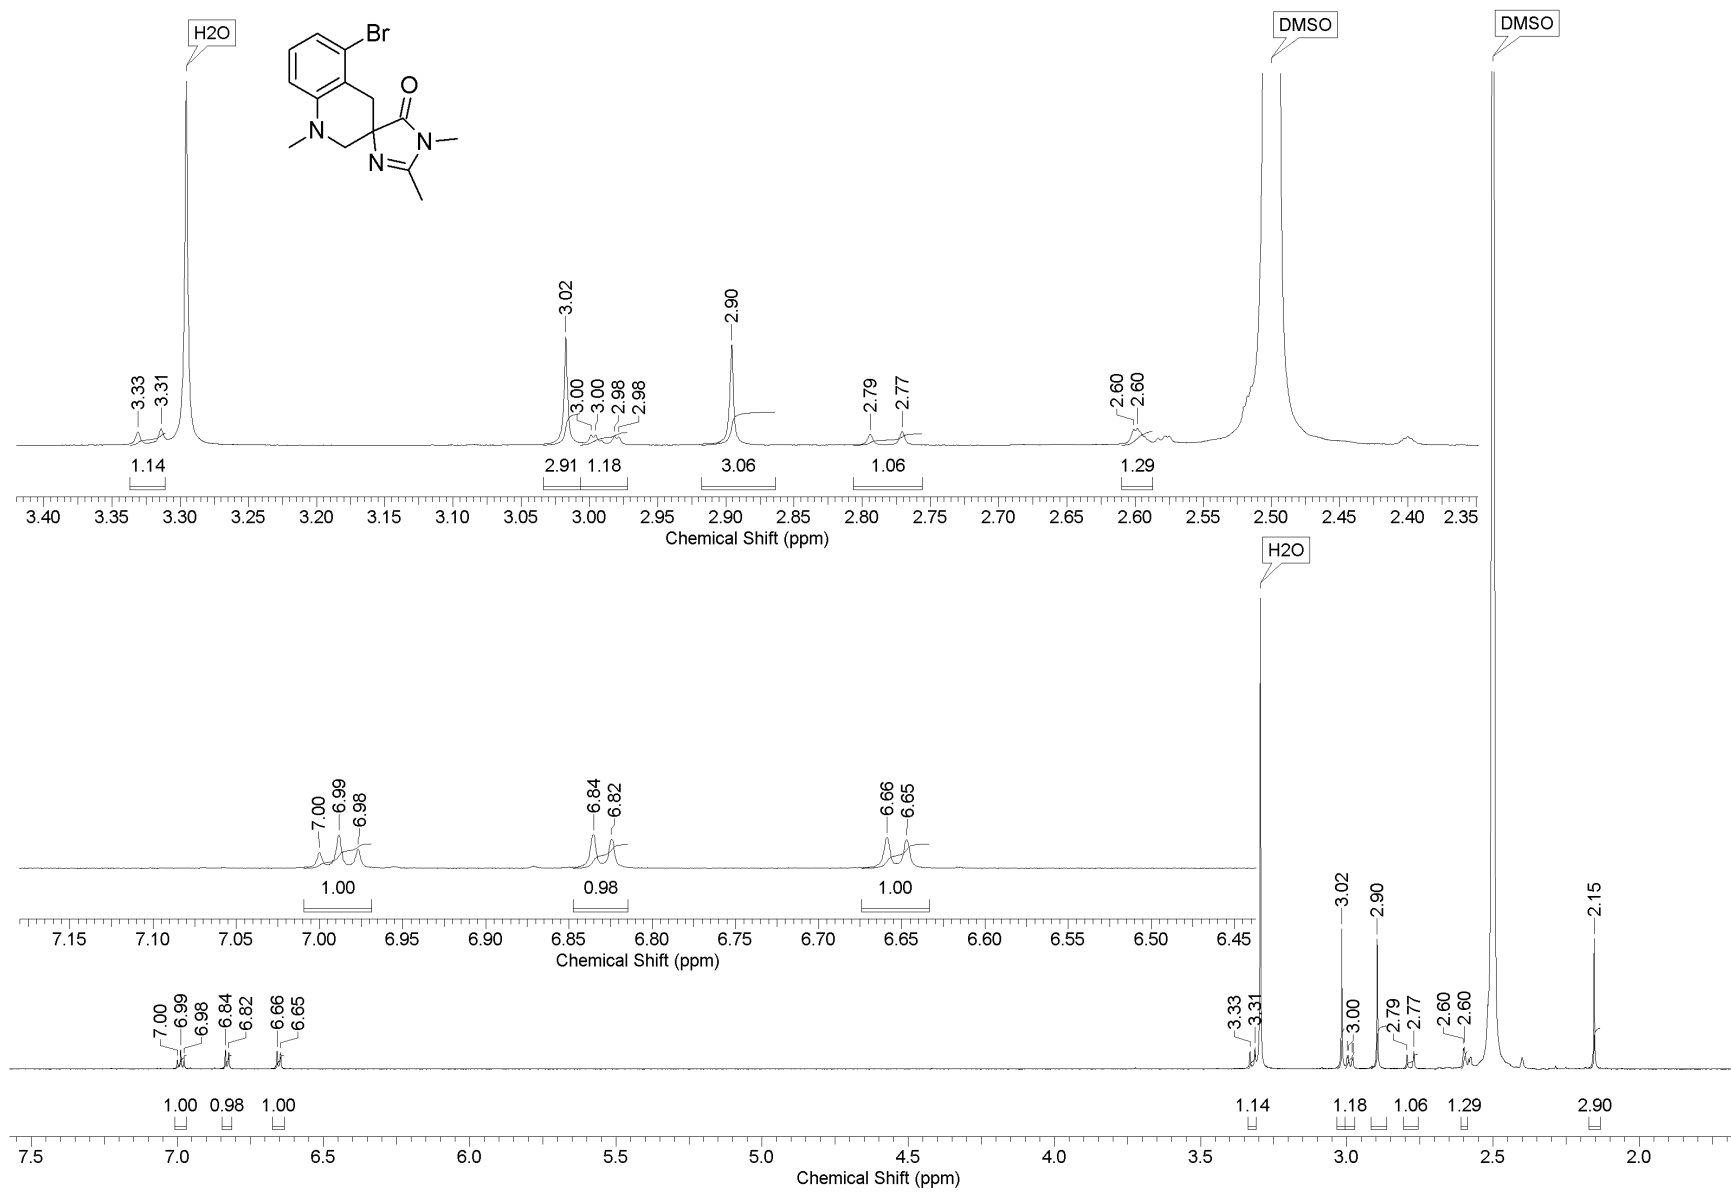

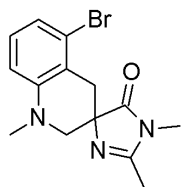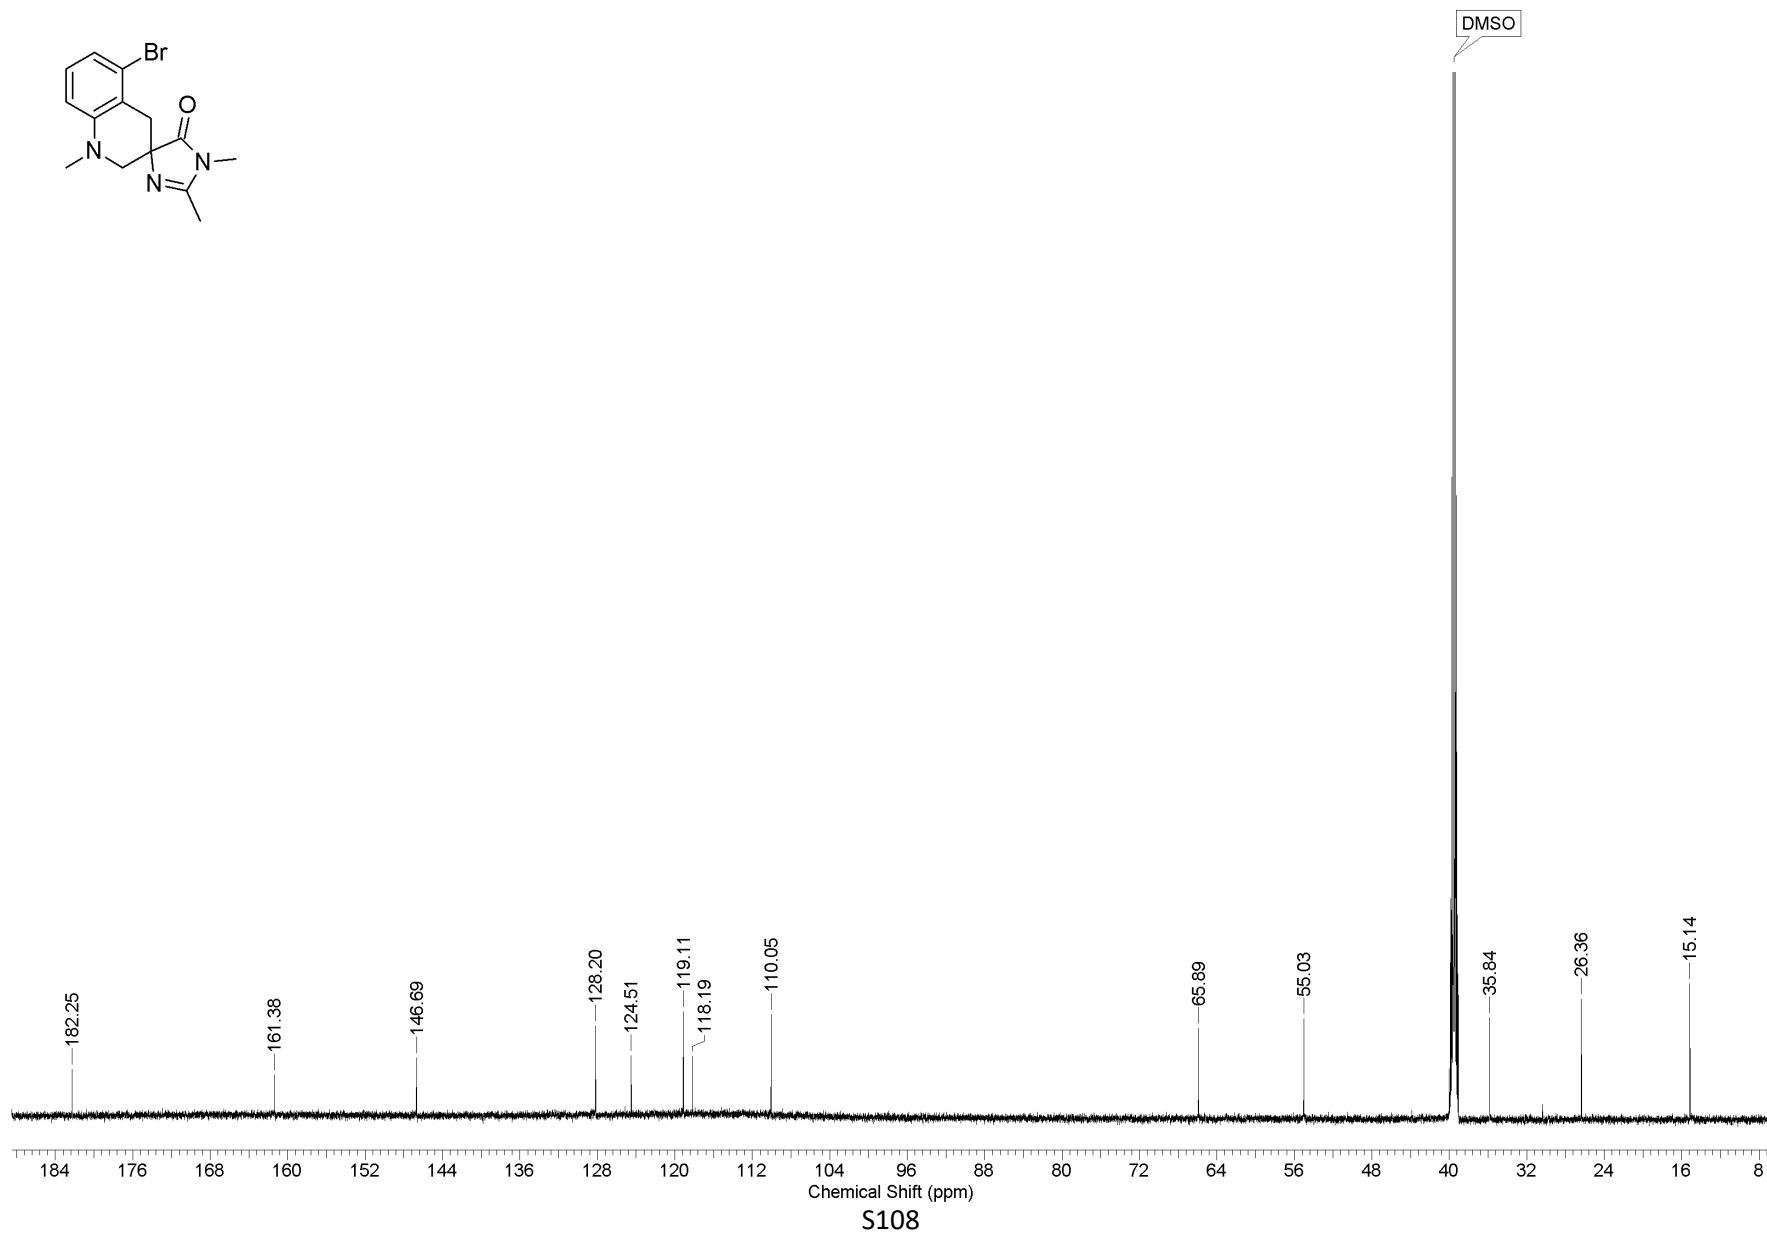

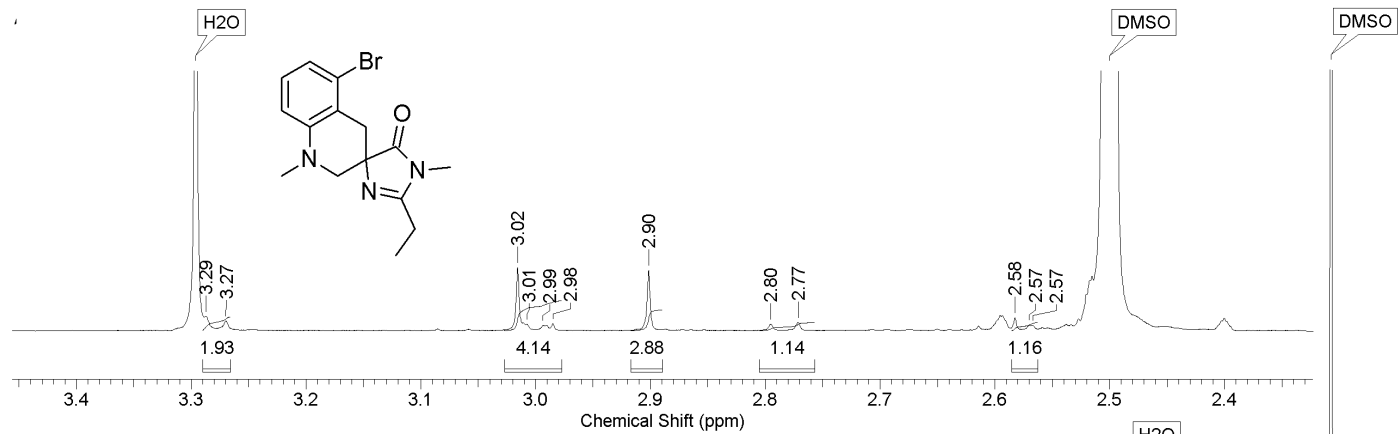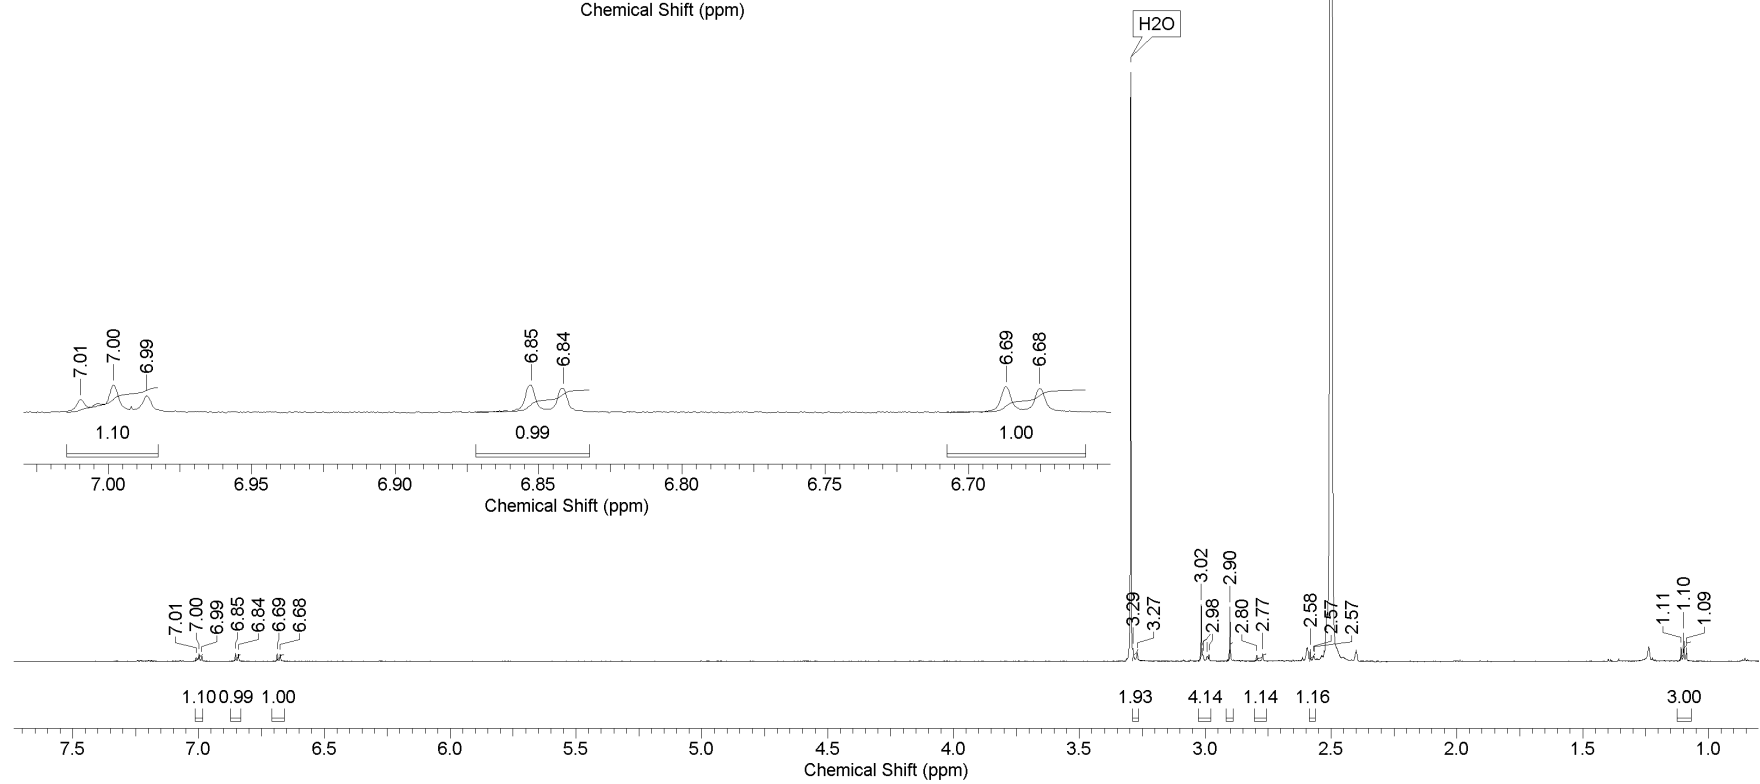

S109

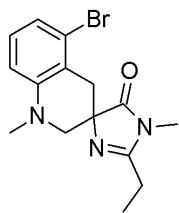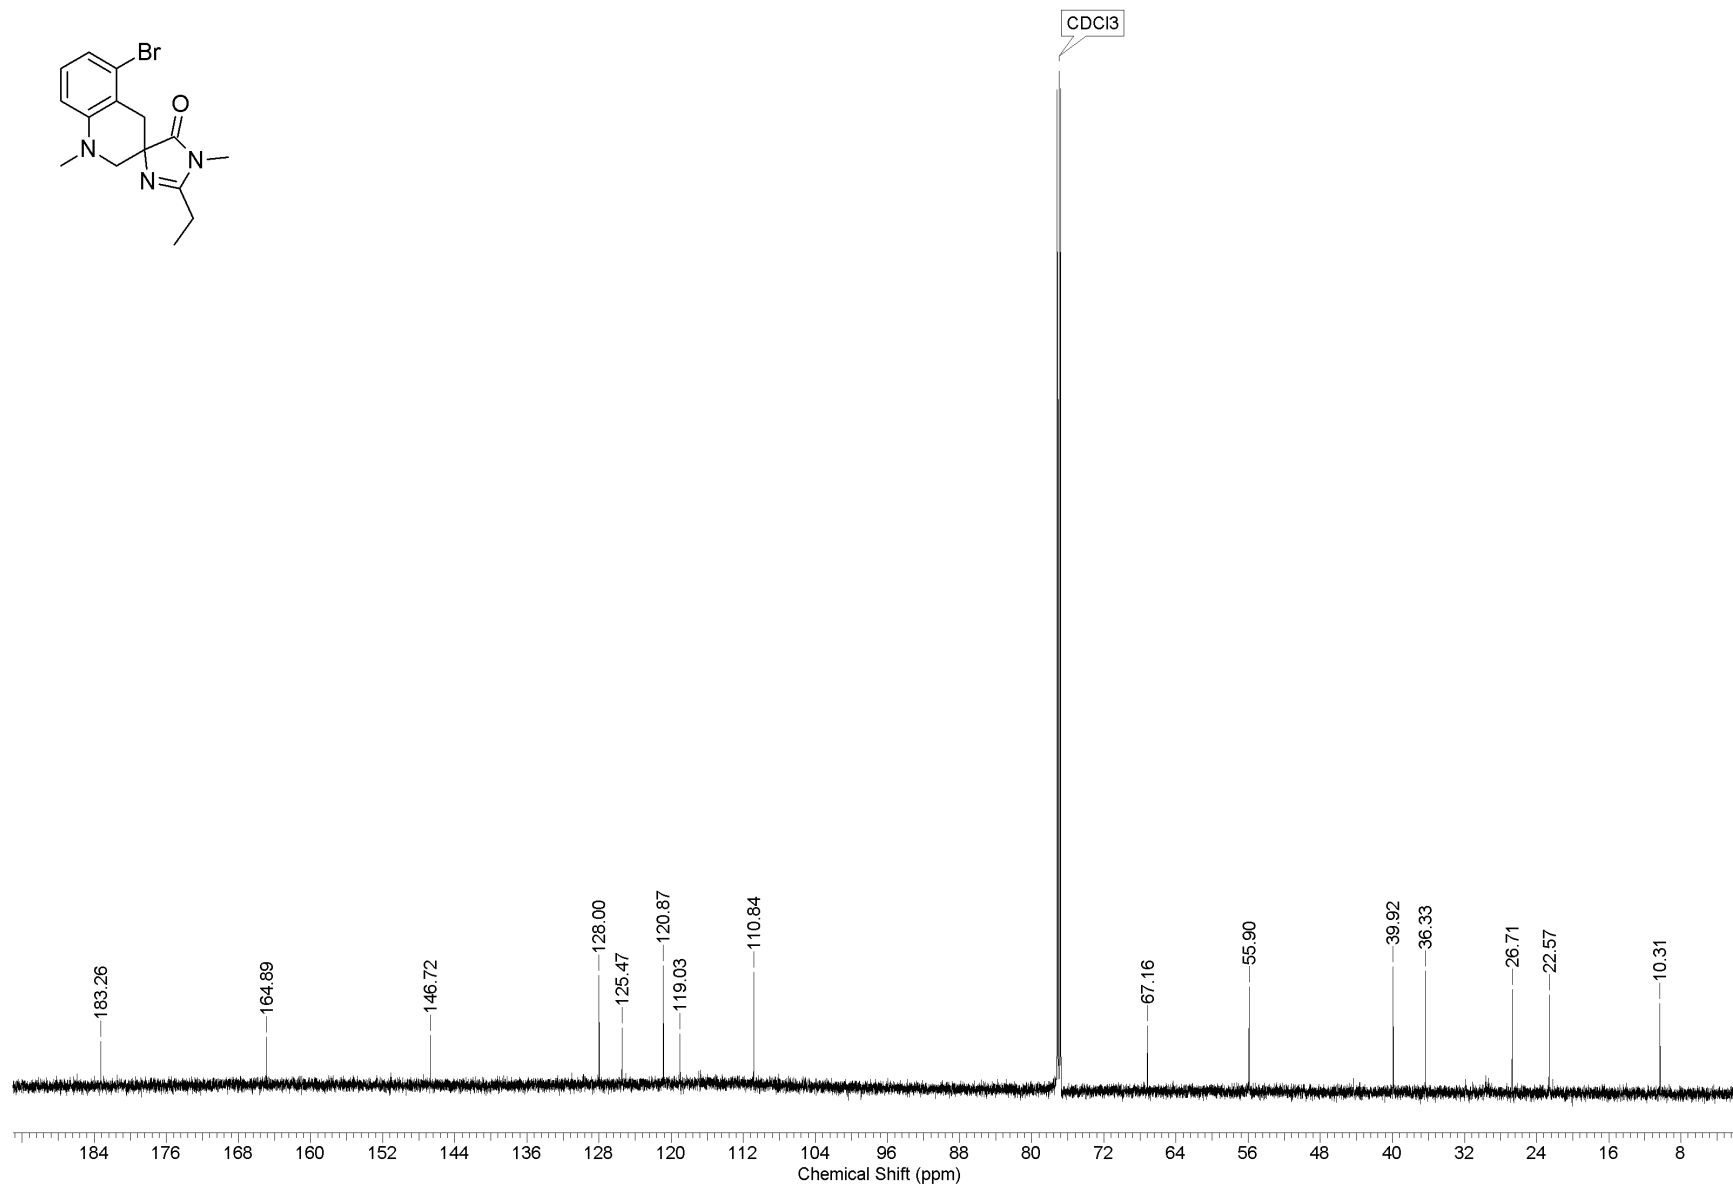

S110

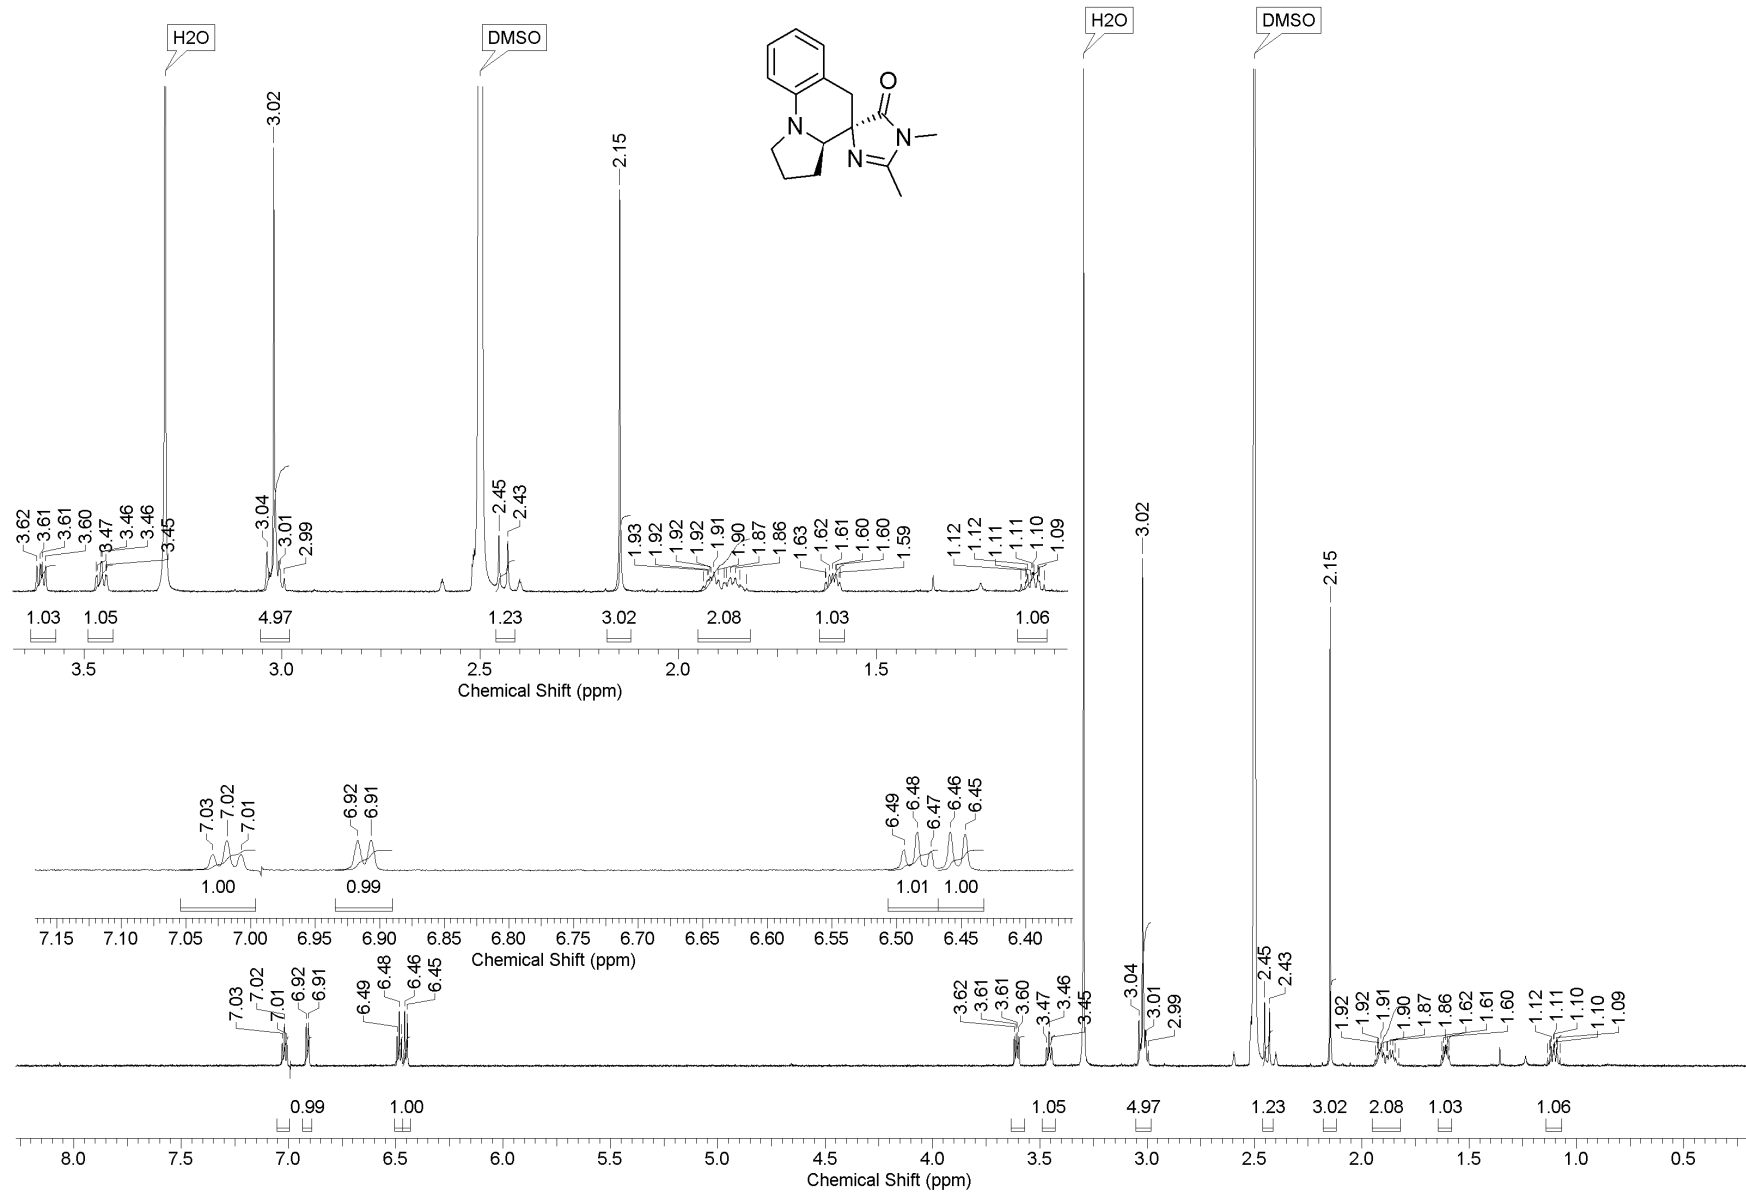

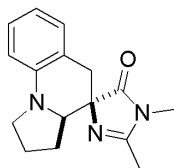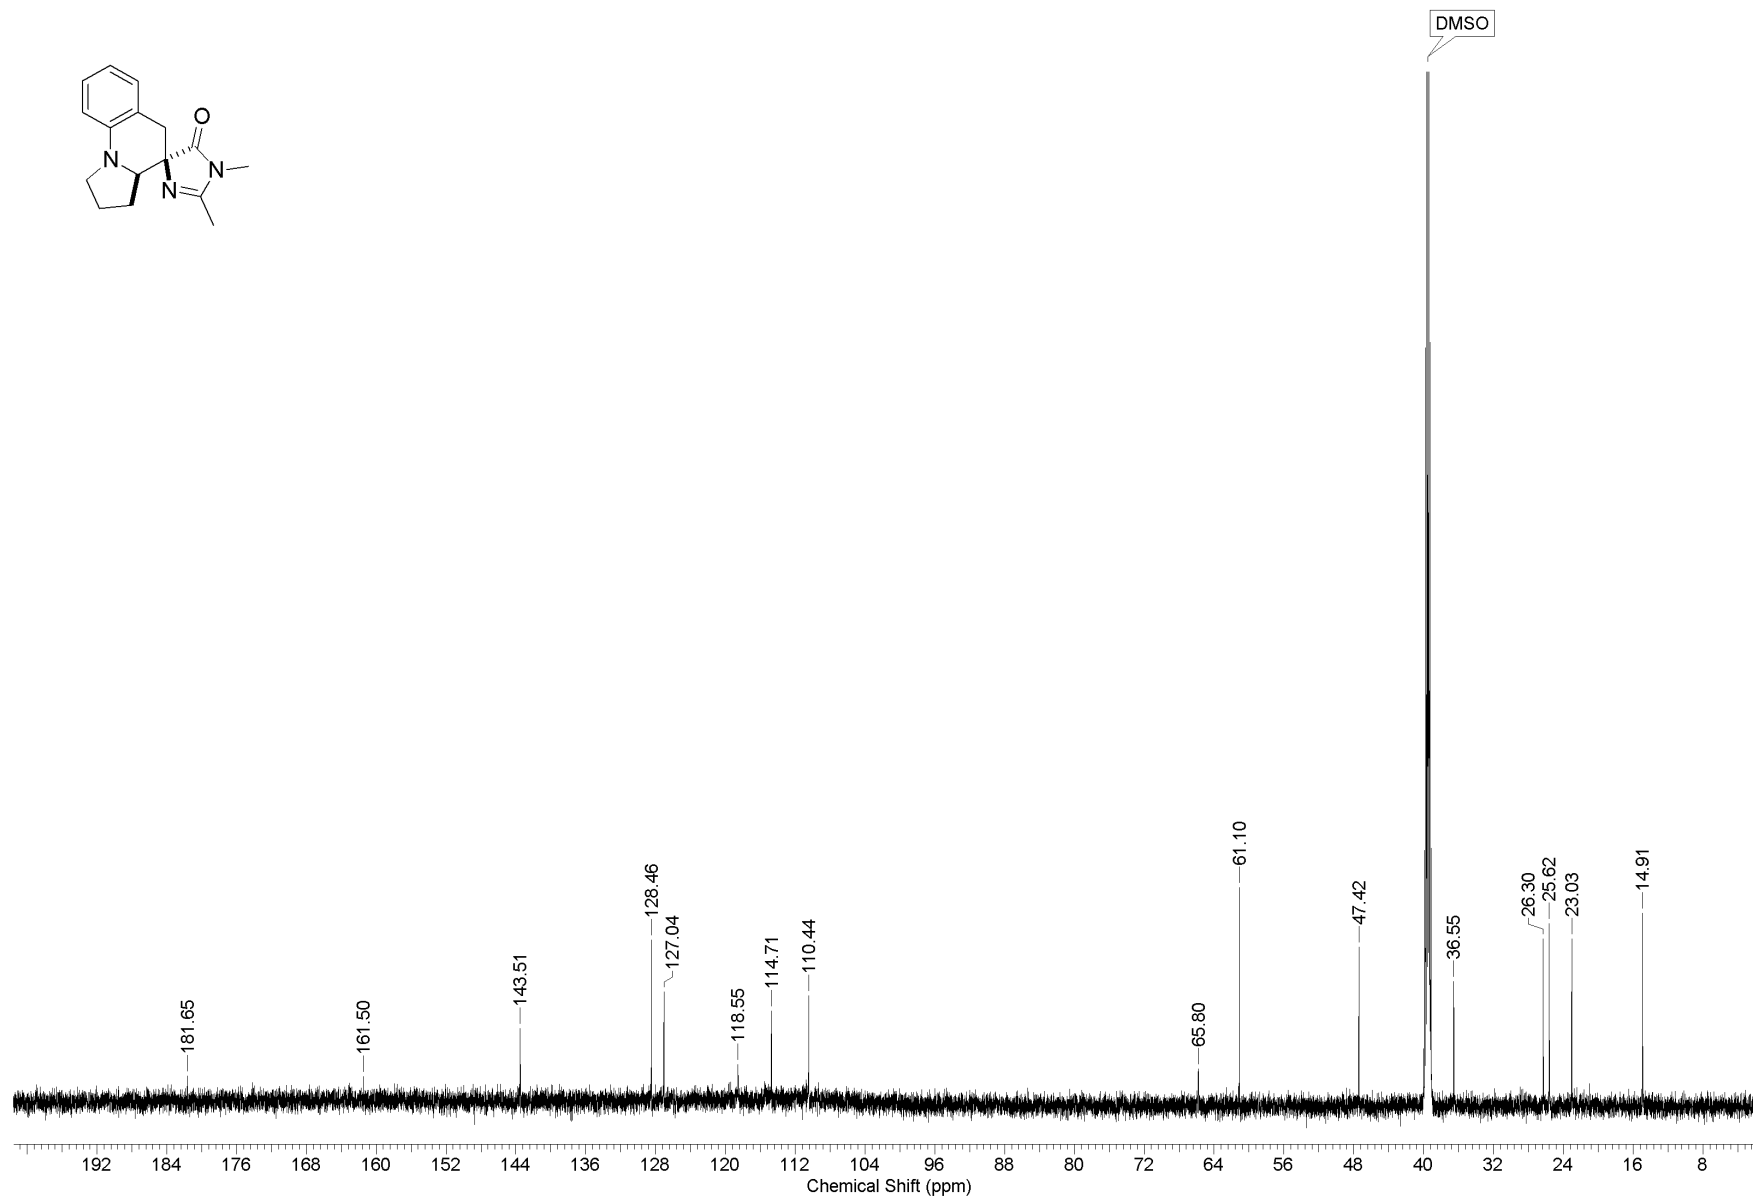

S112



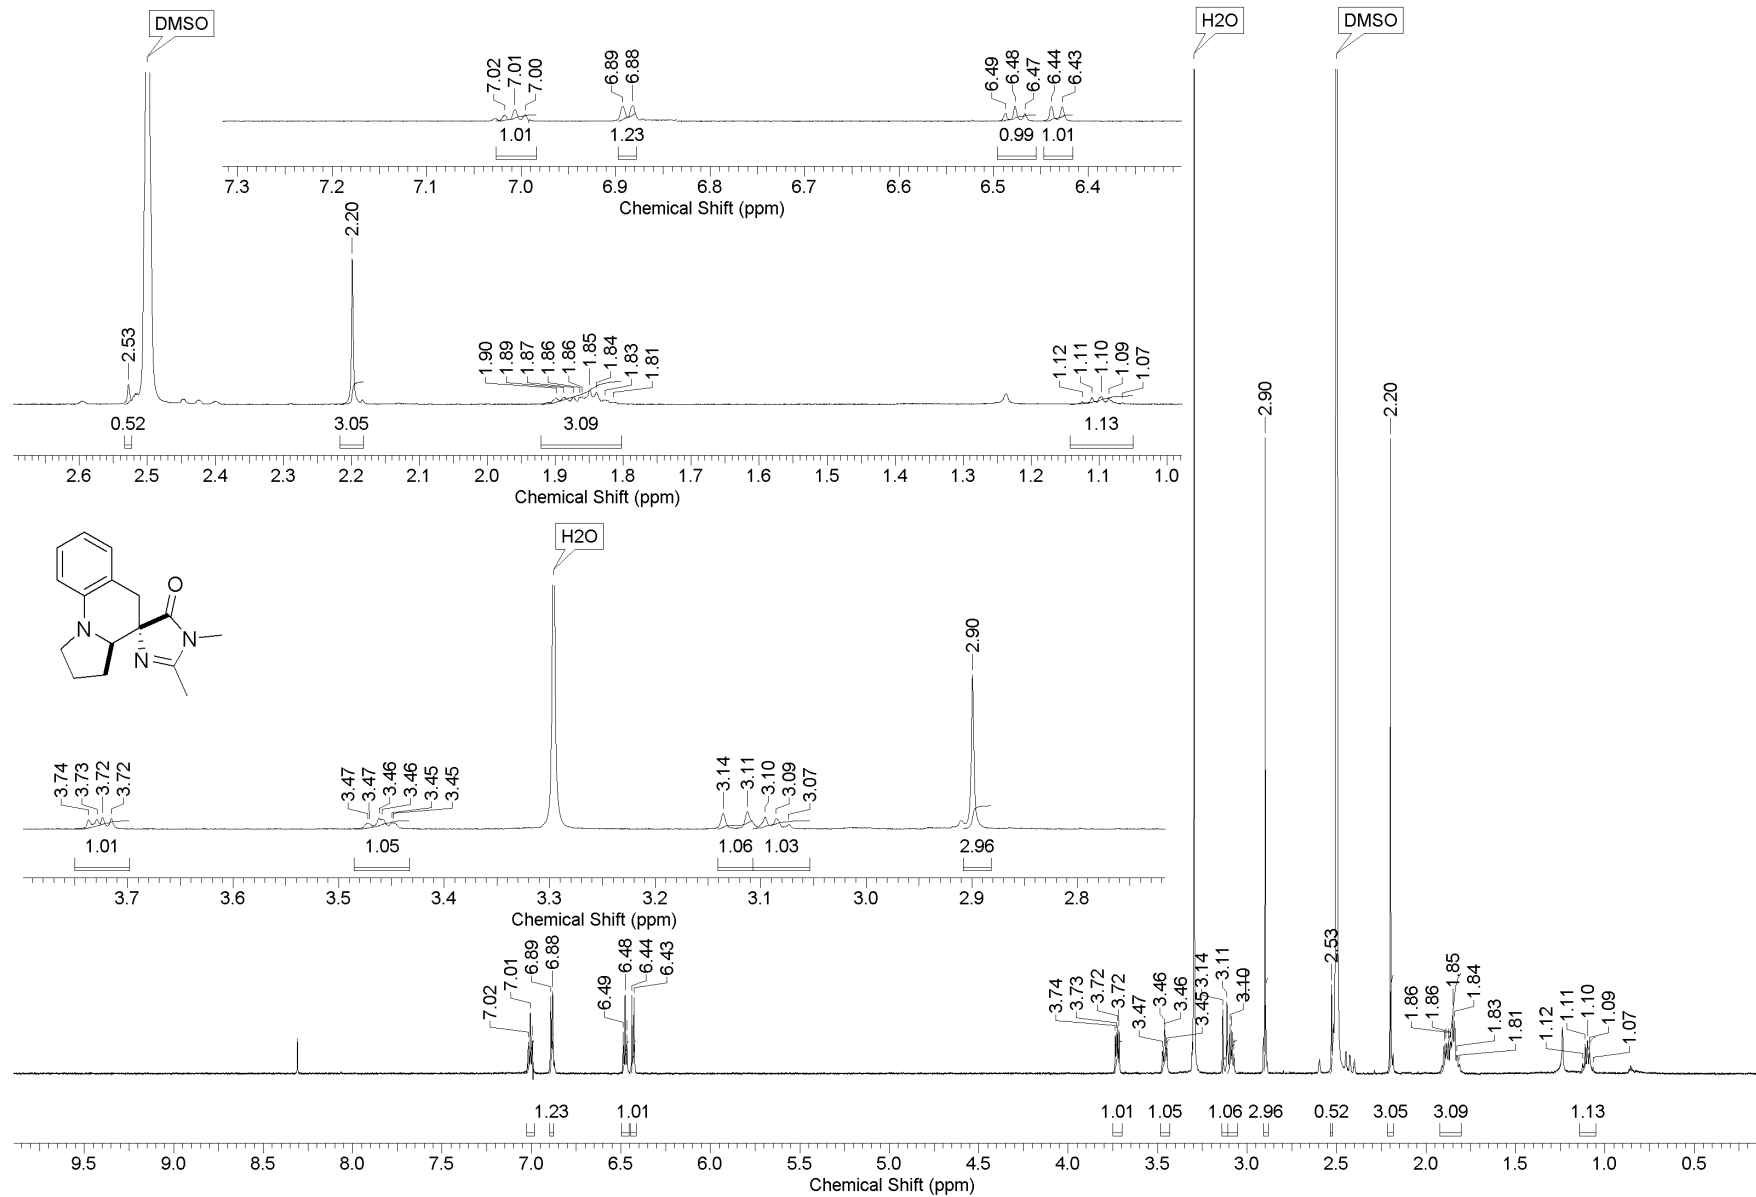

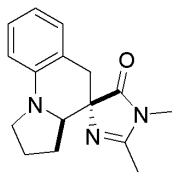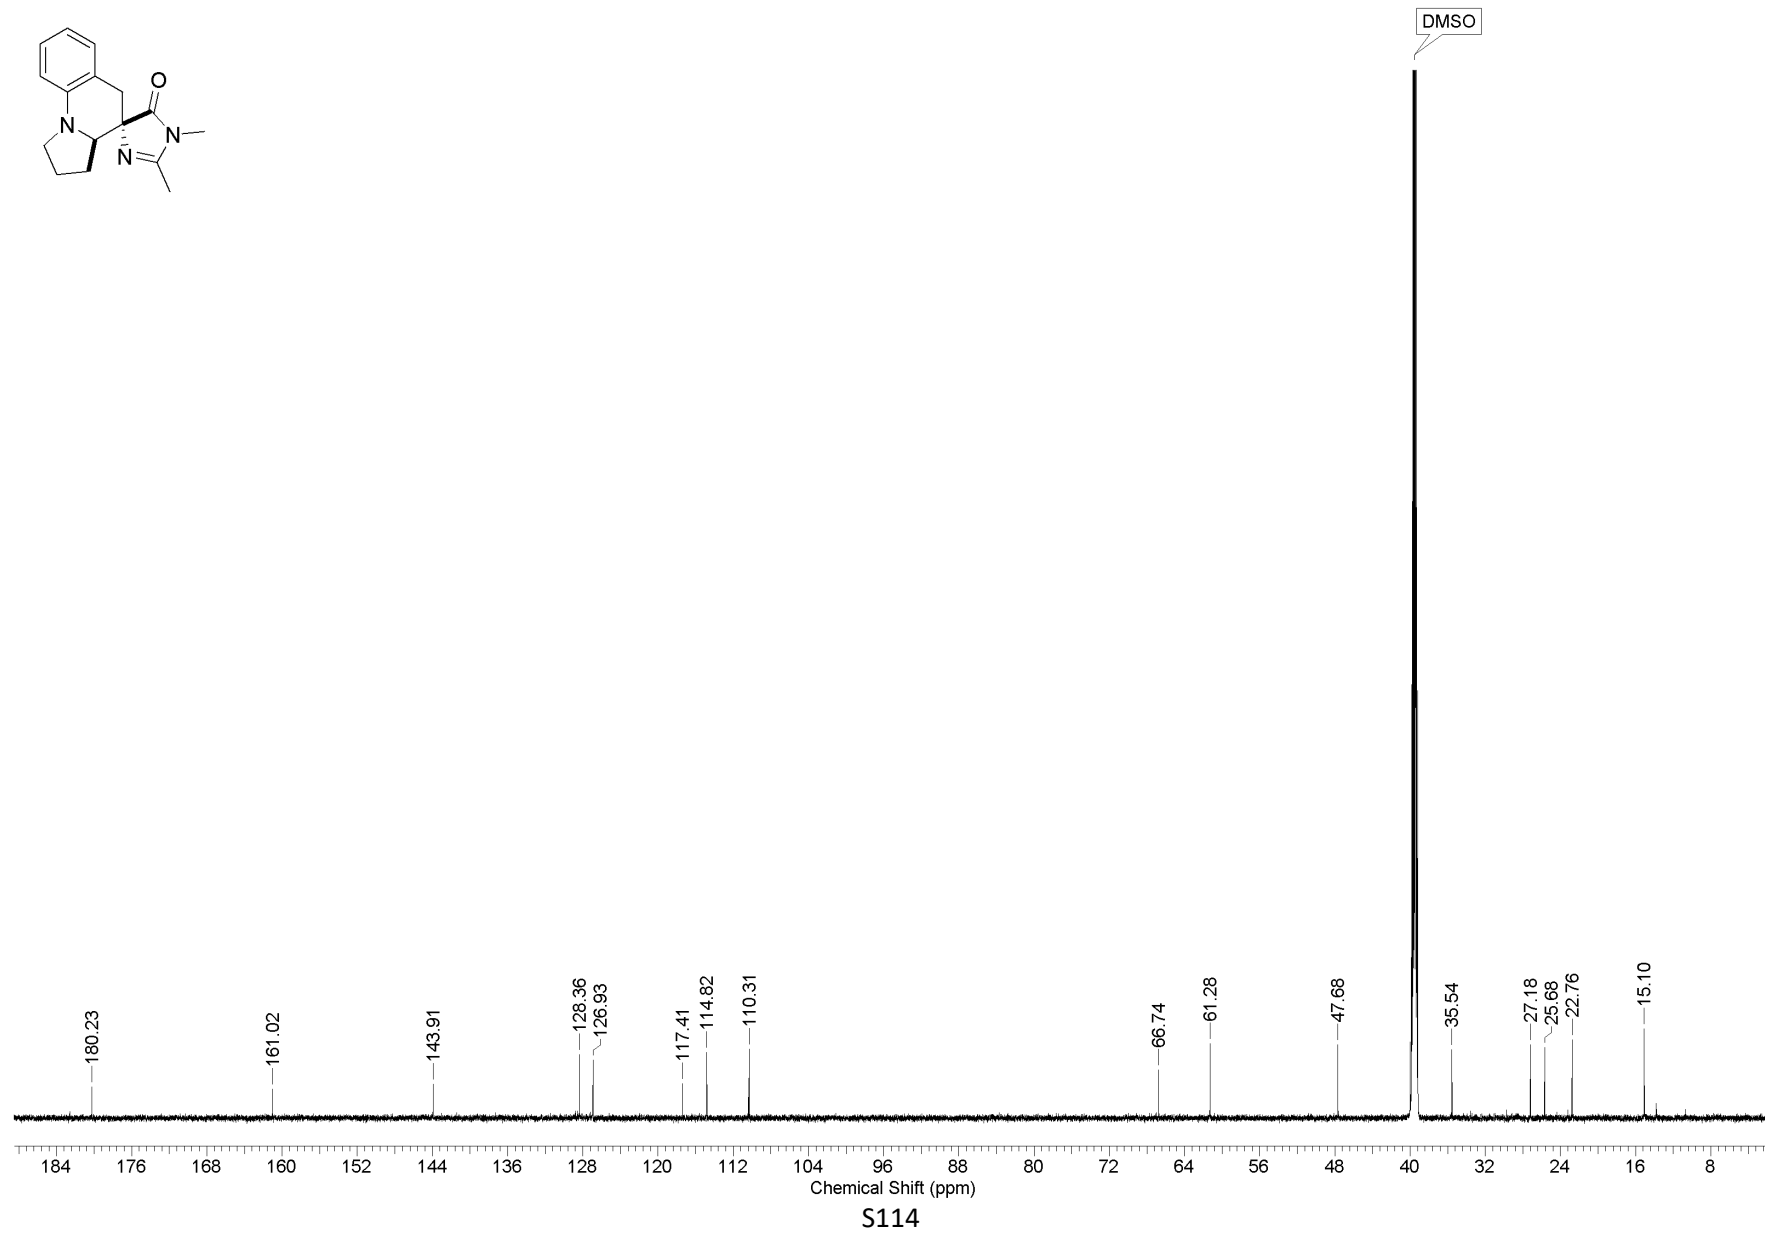

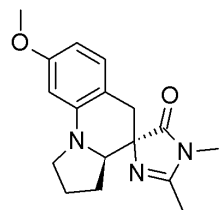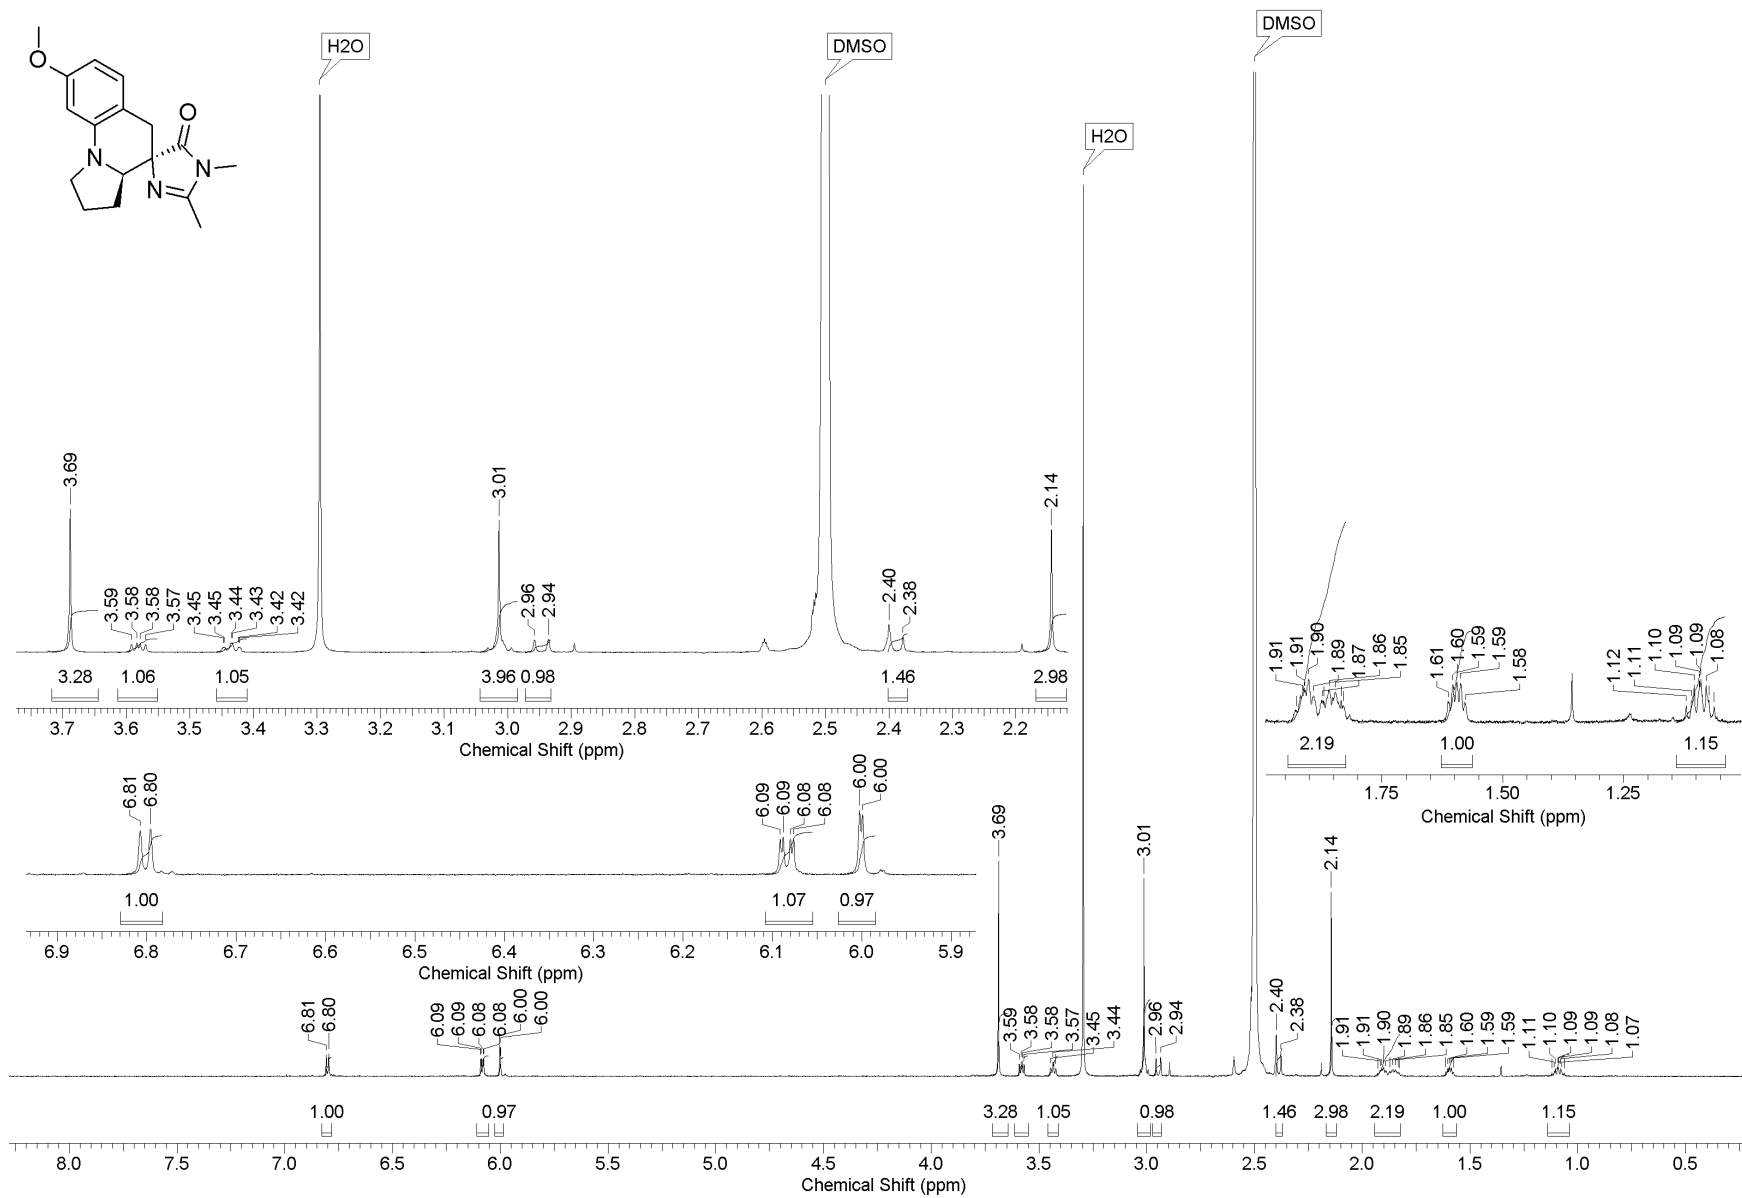

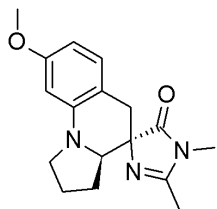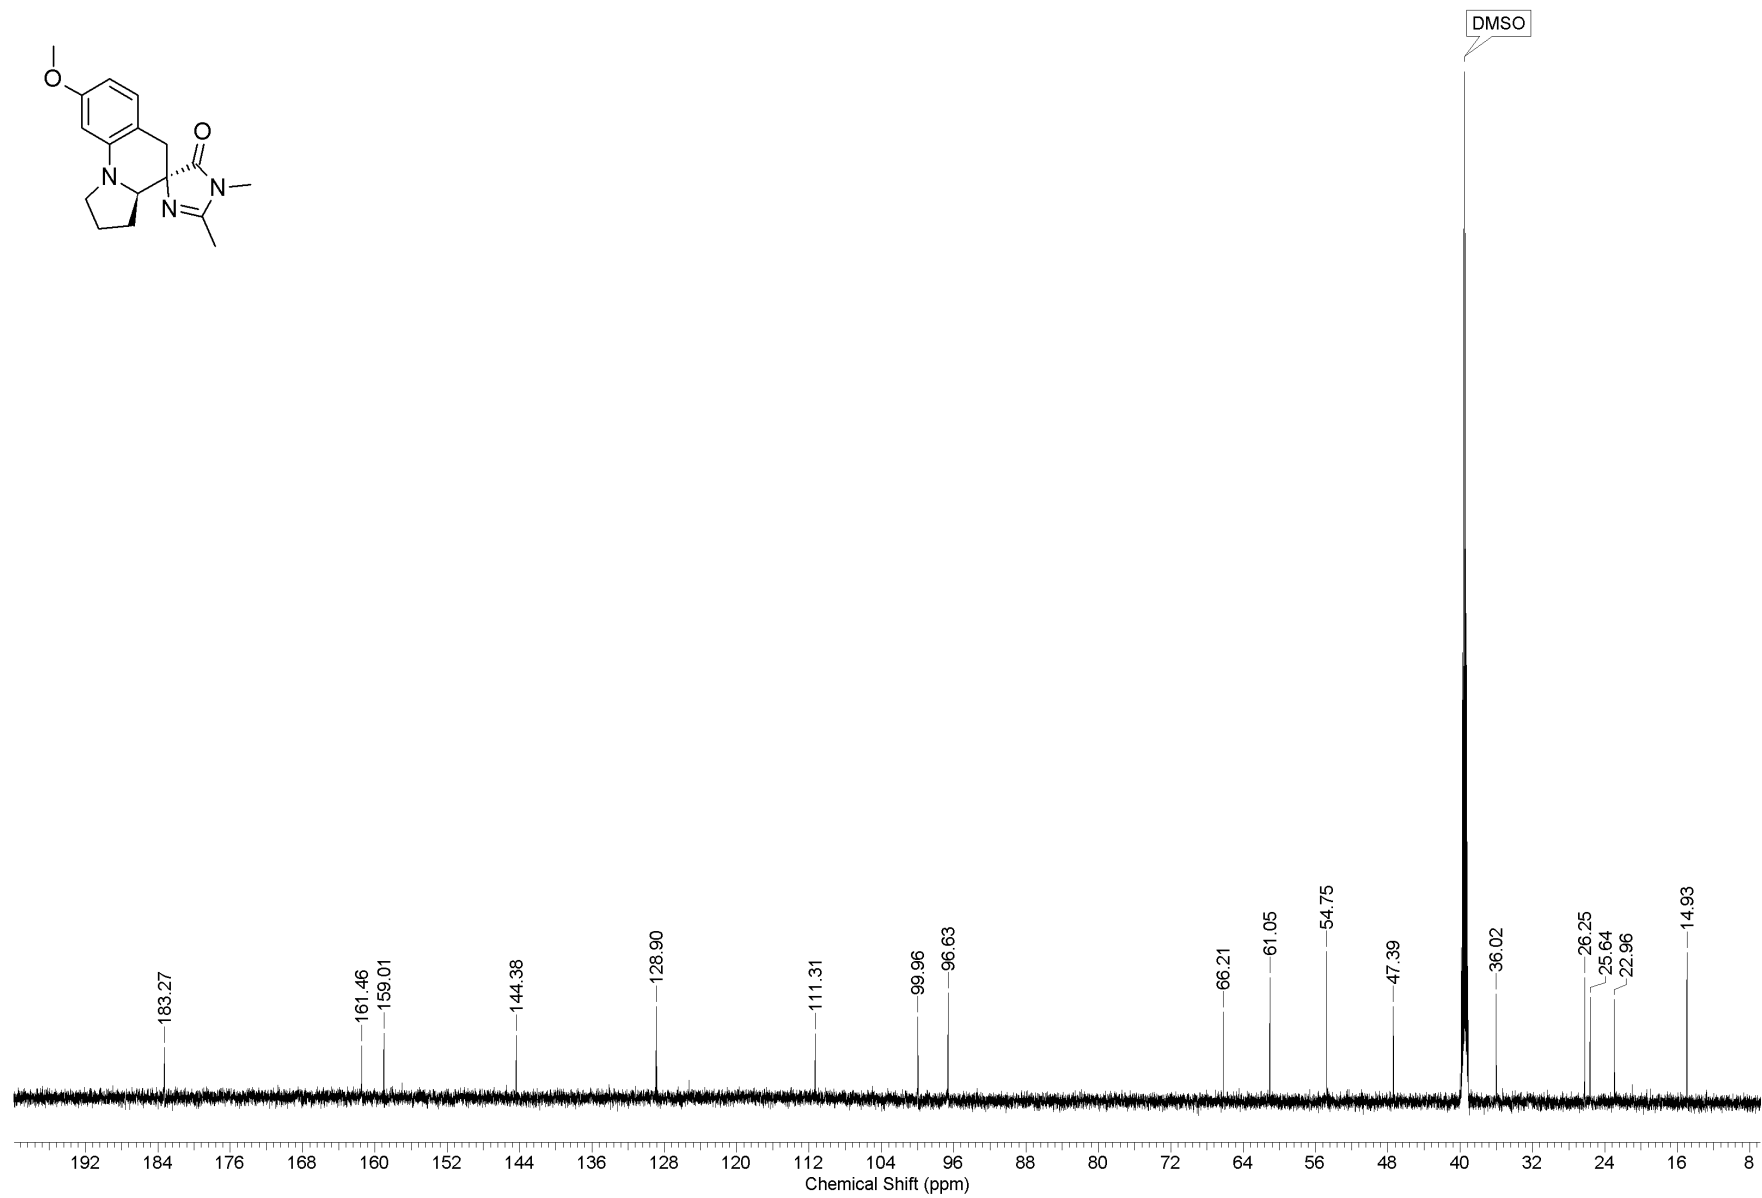

S116

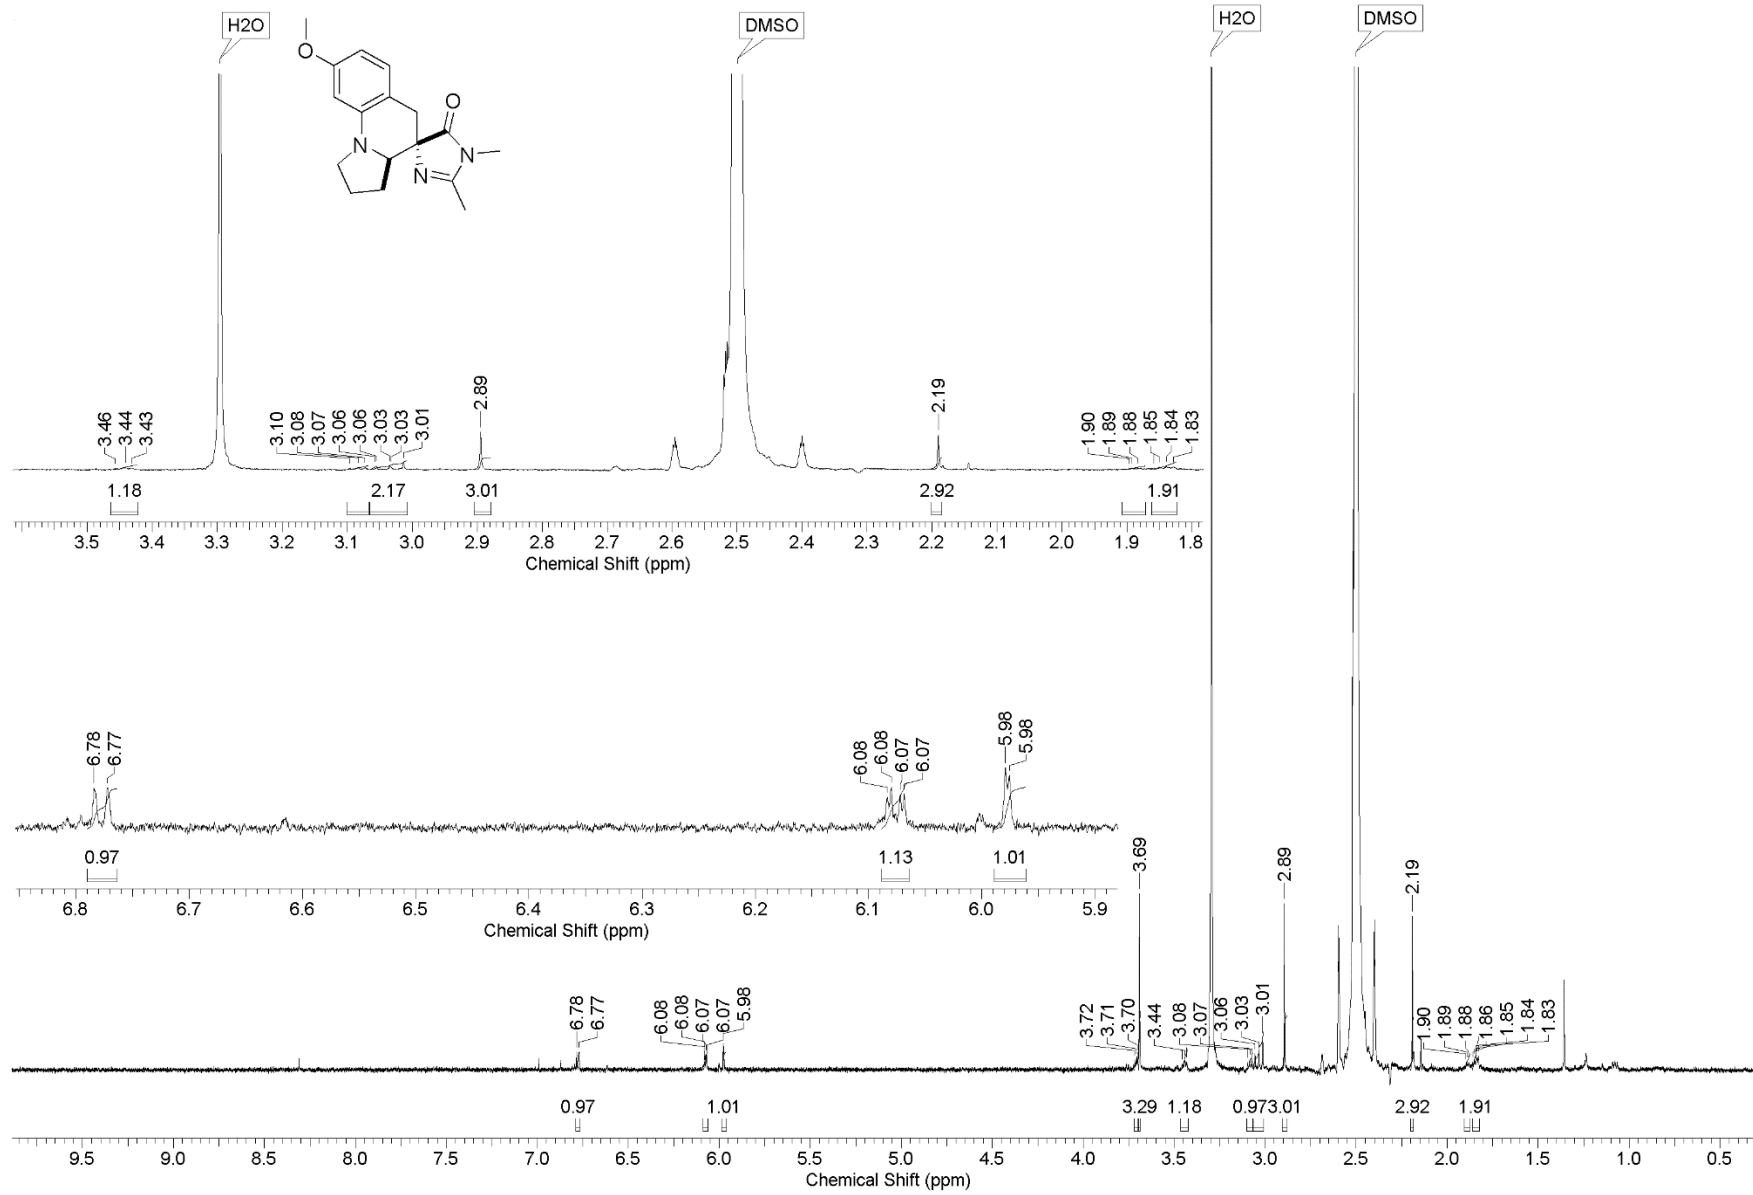

S117

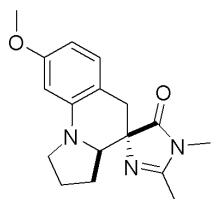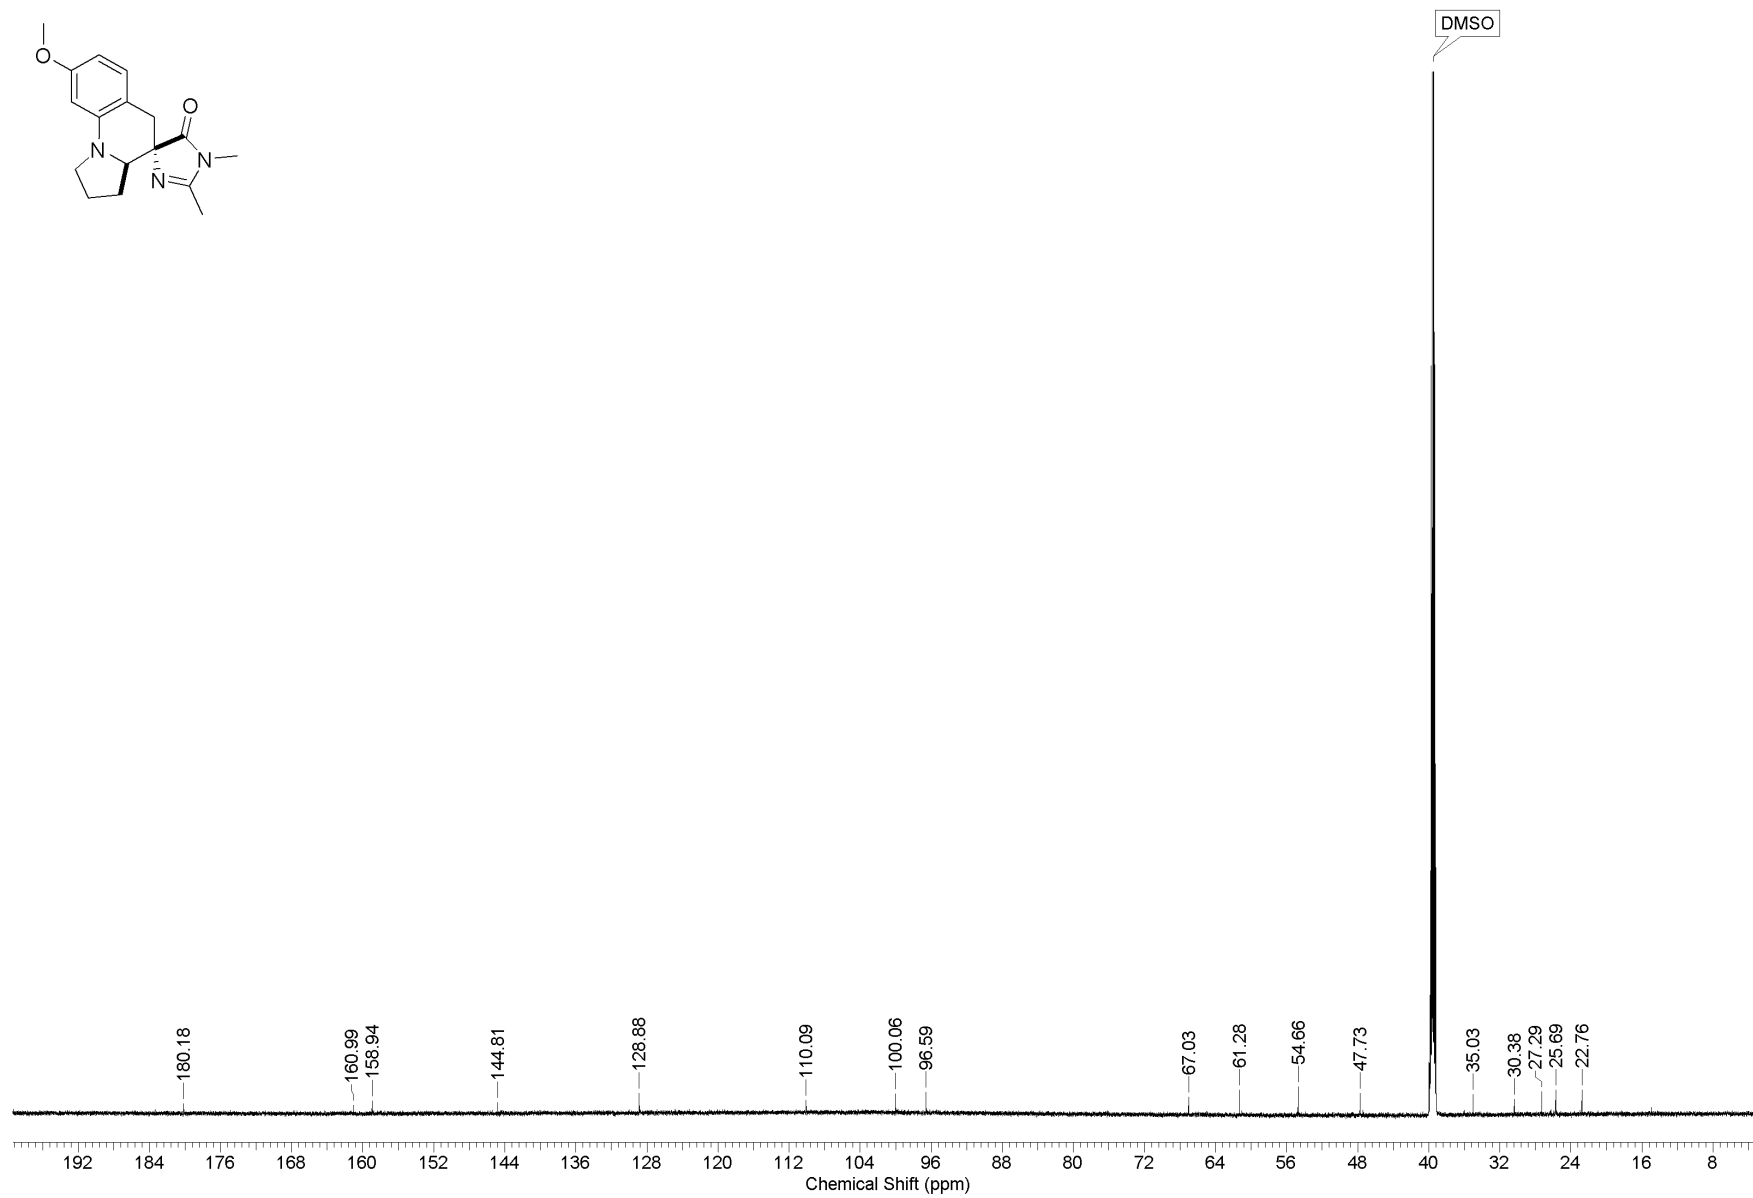

S118

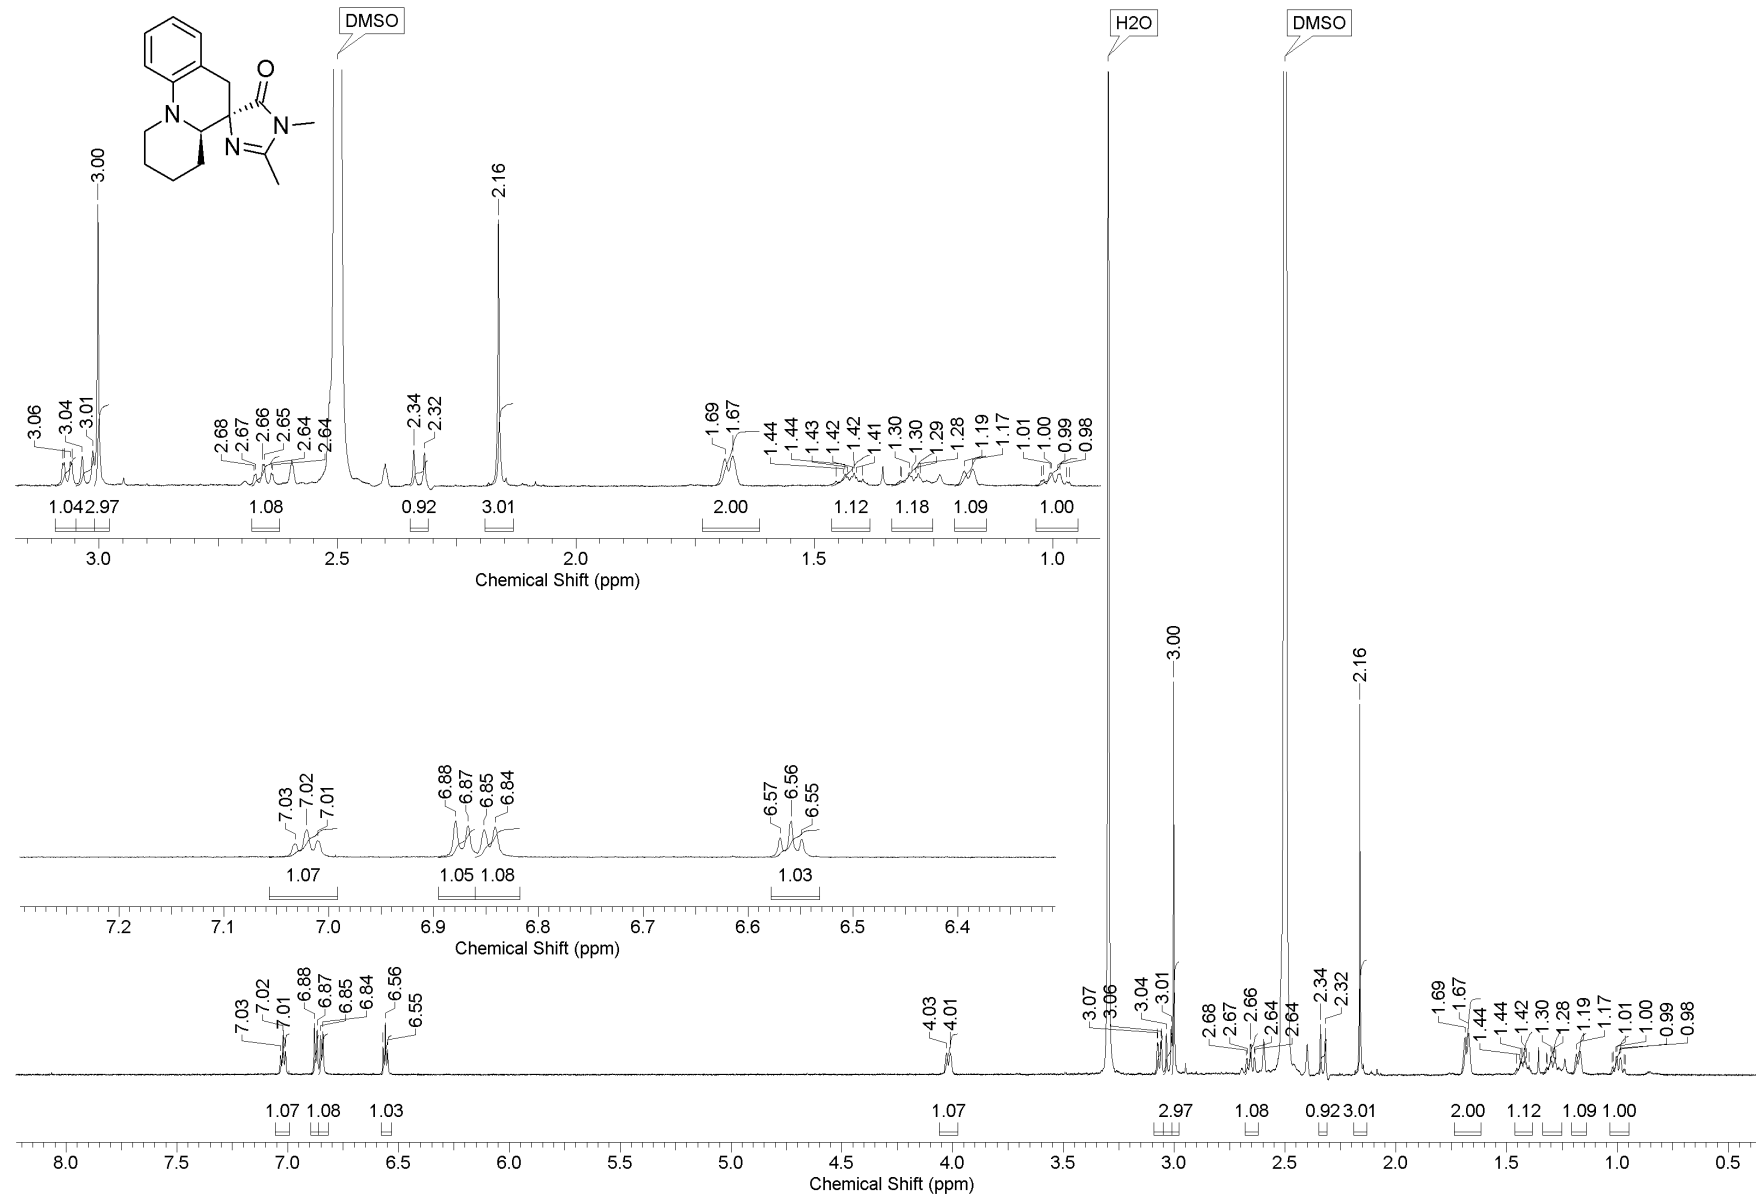

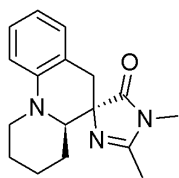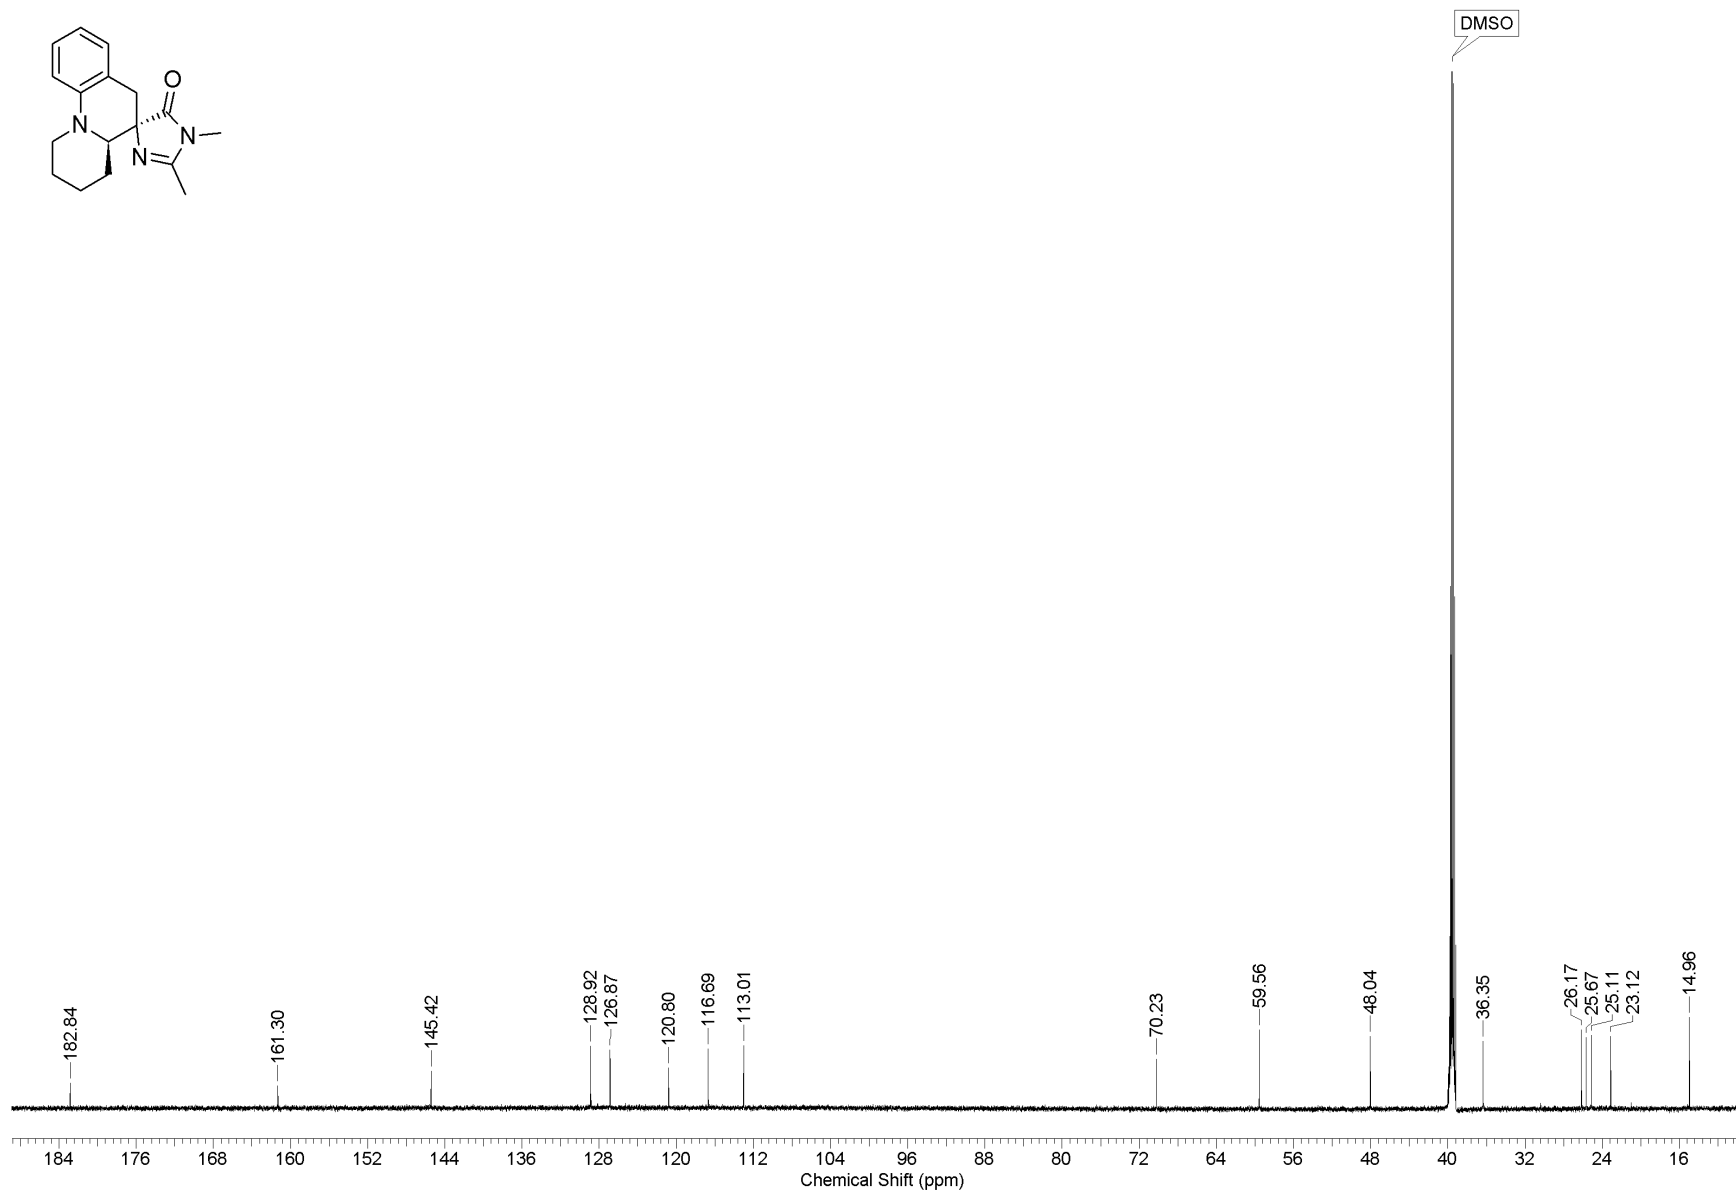

S120



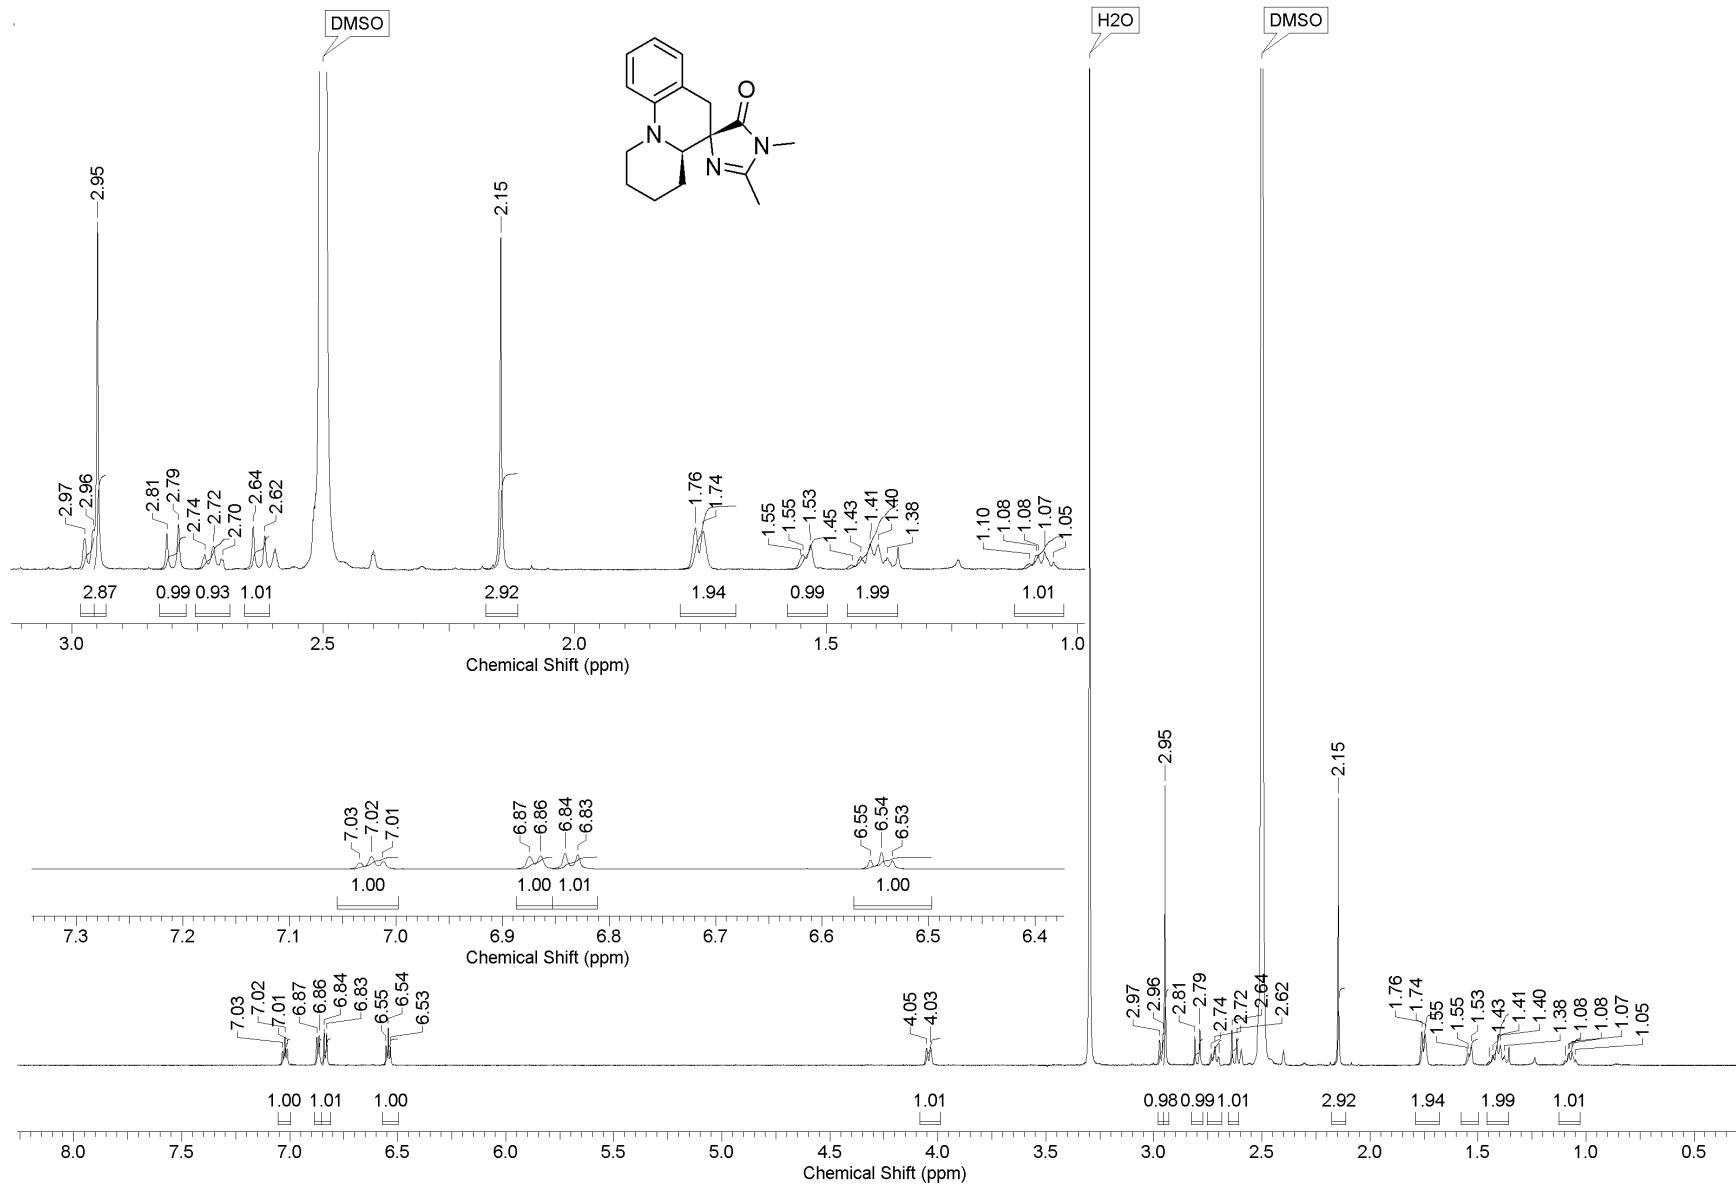

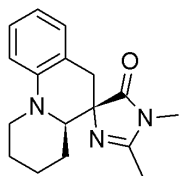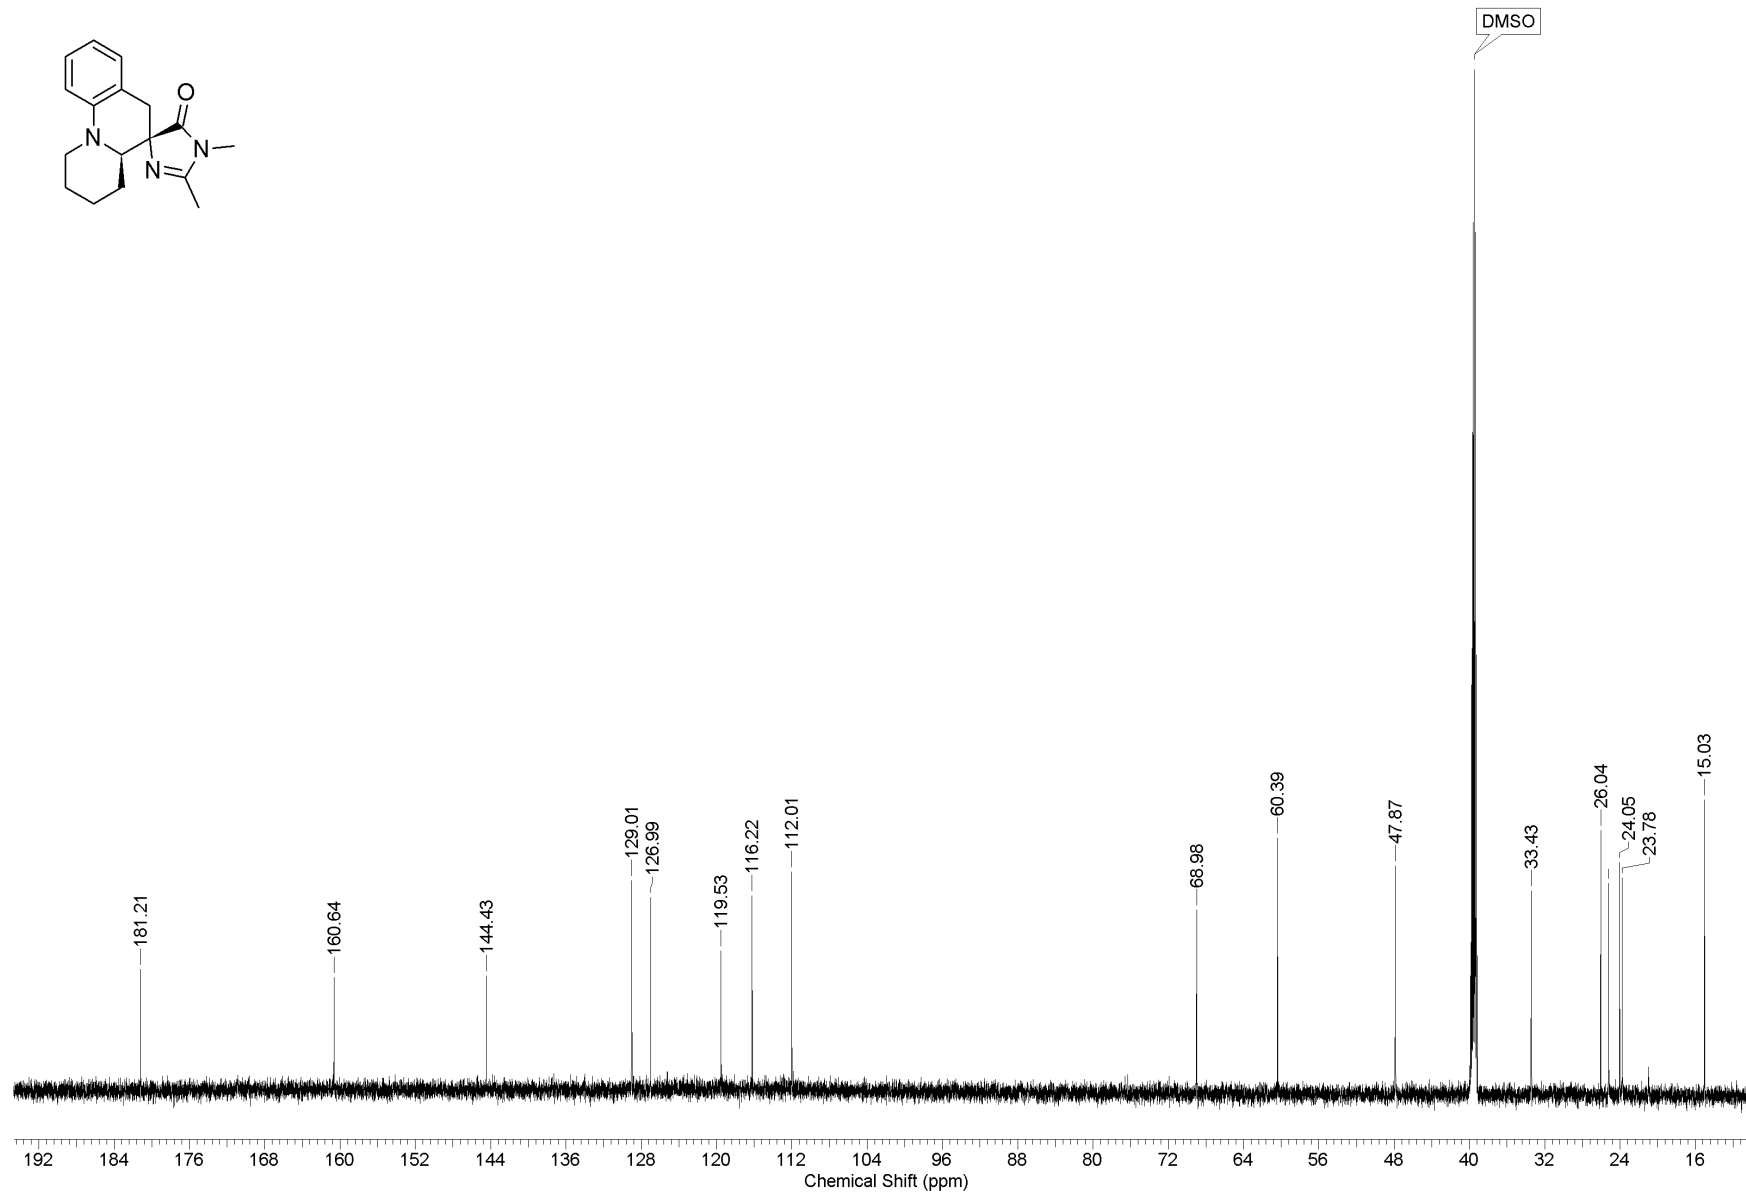

S122

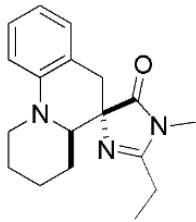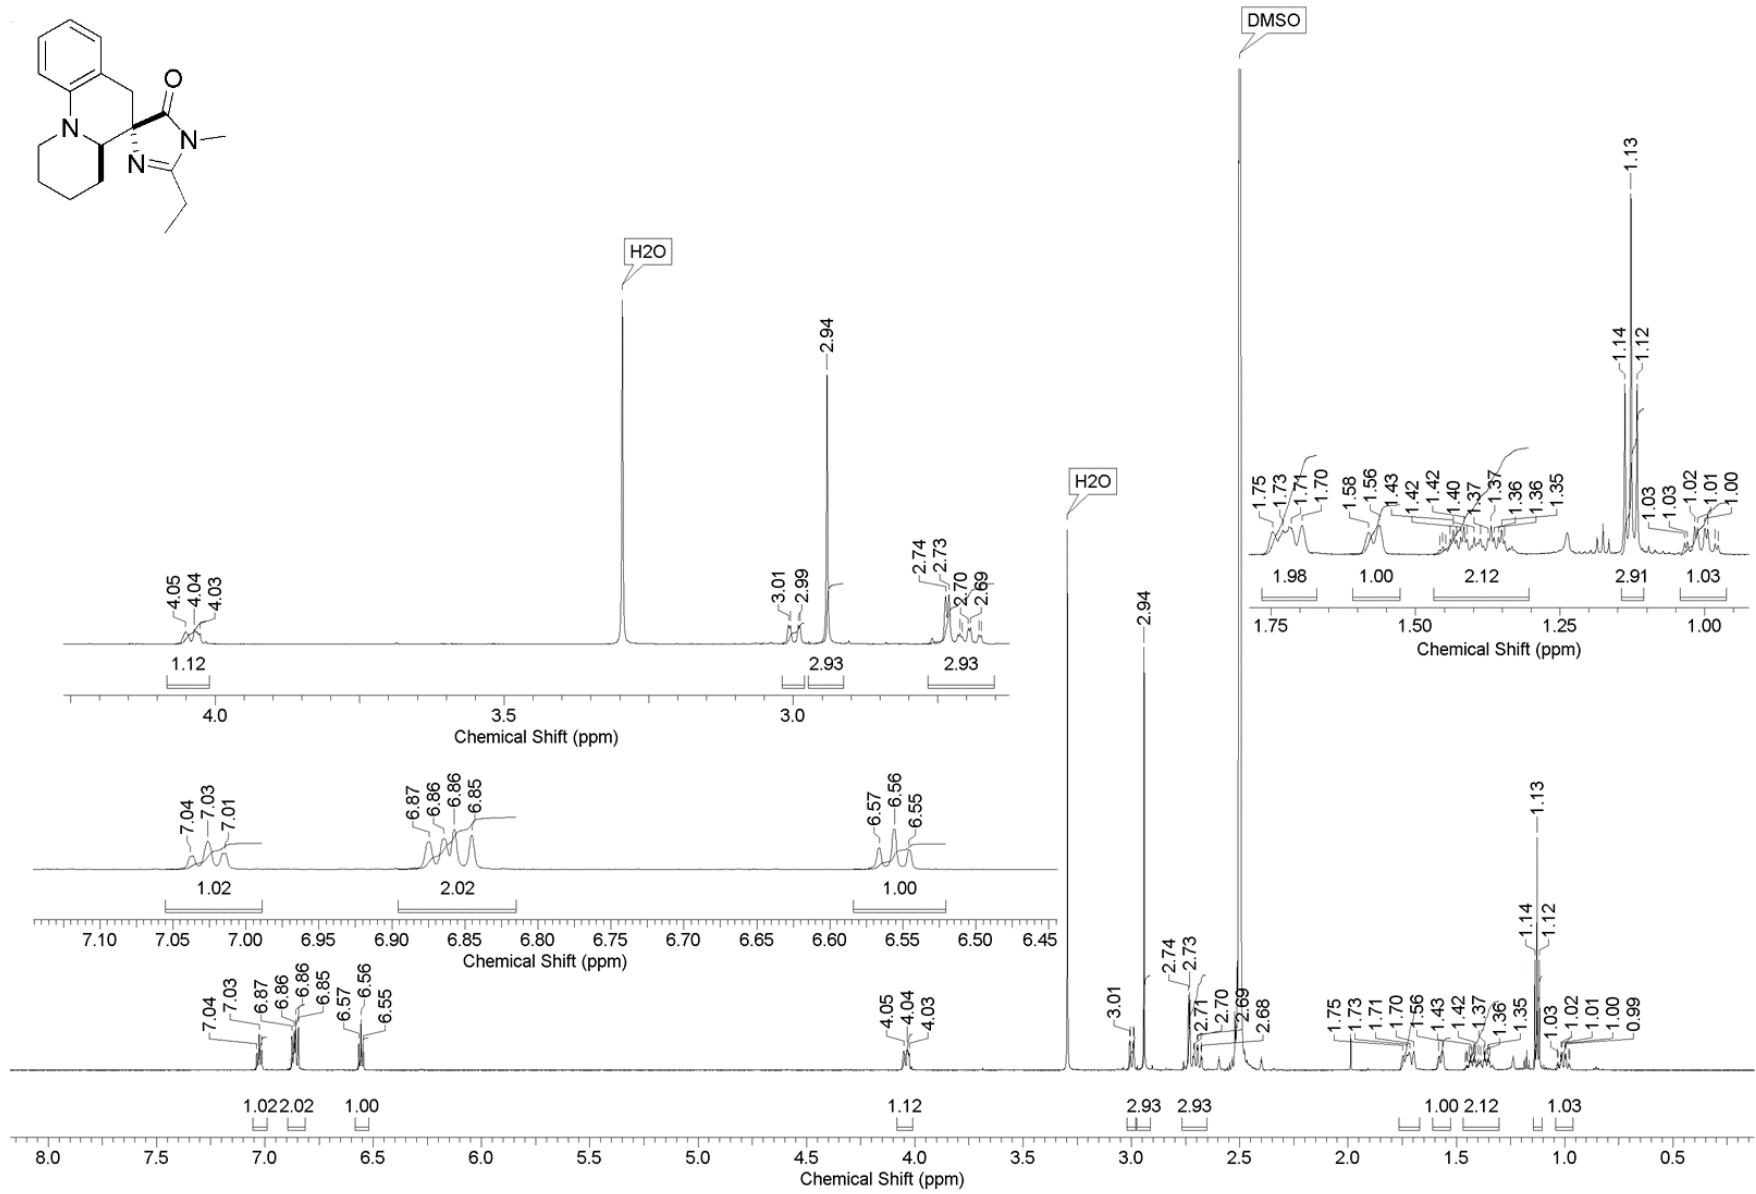

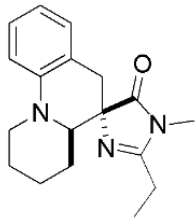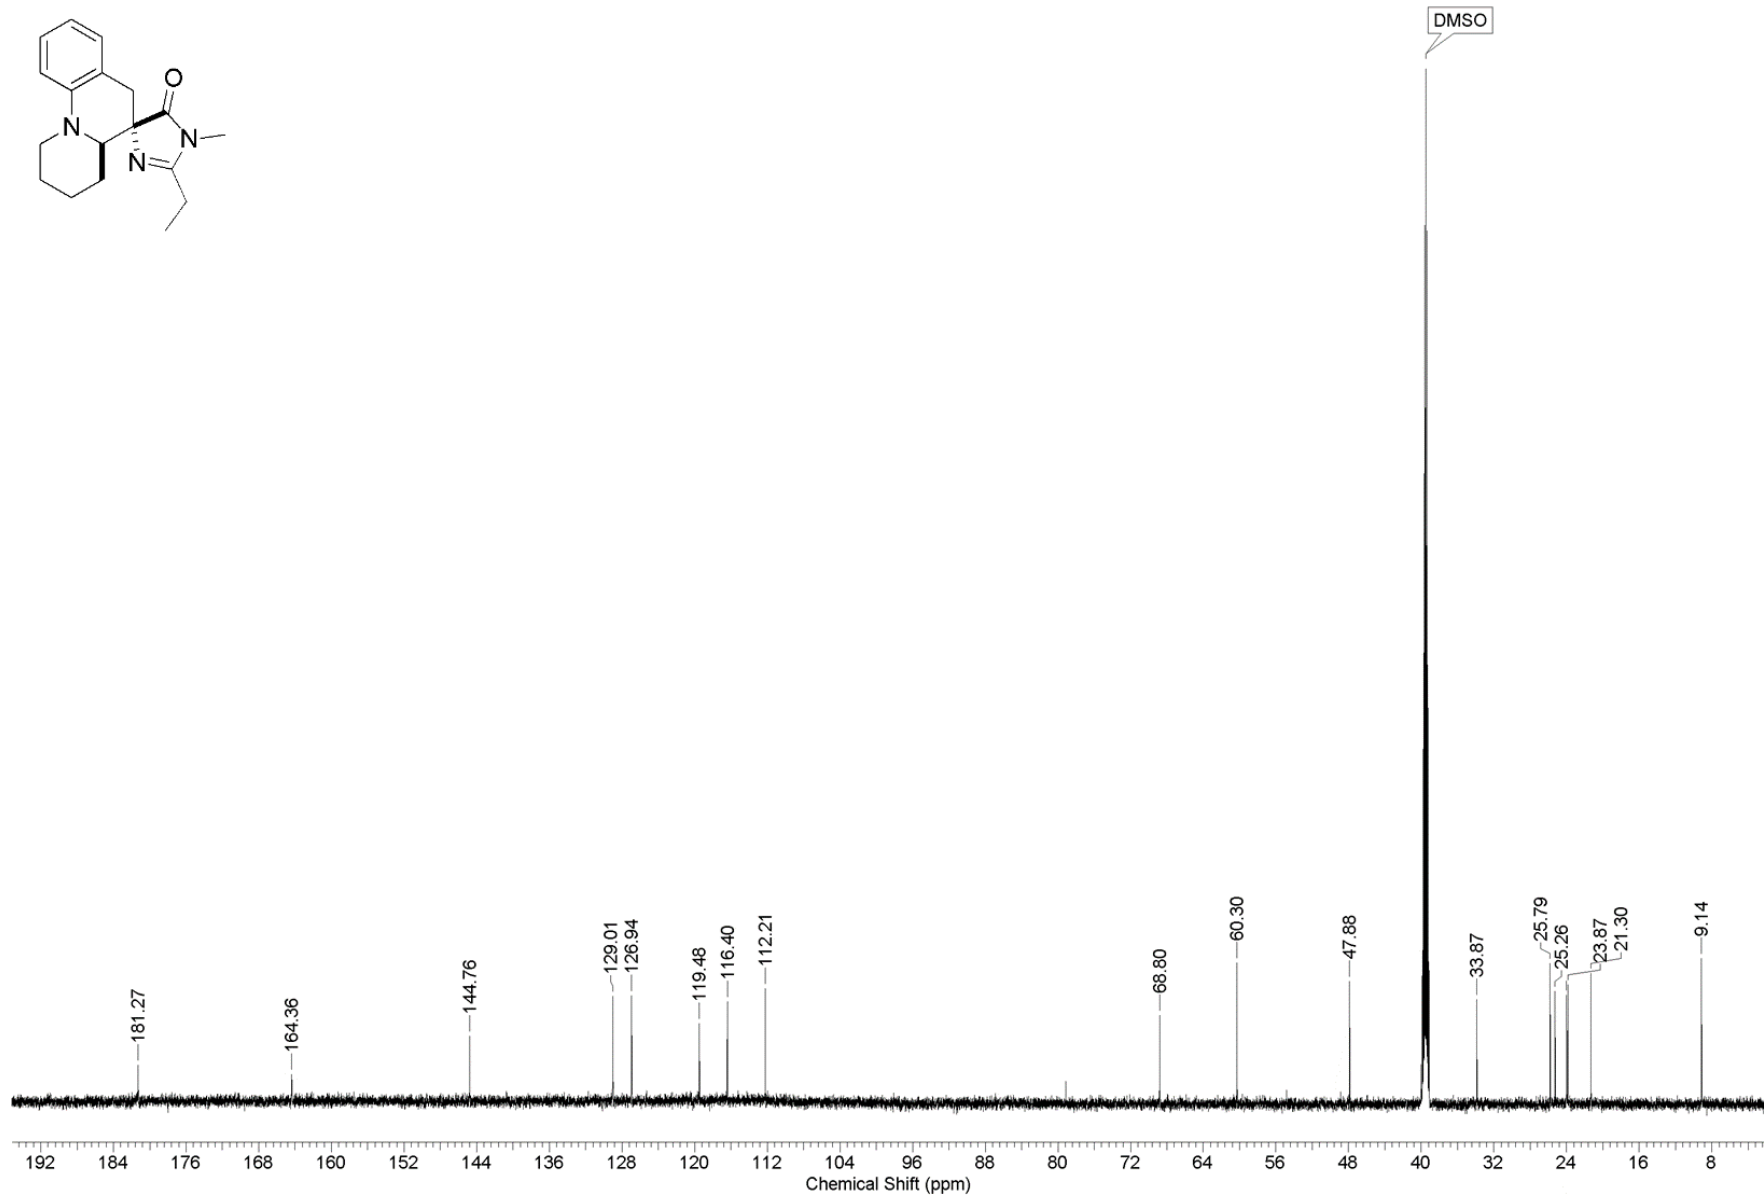

S124

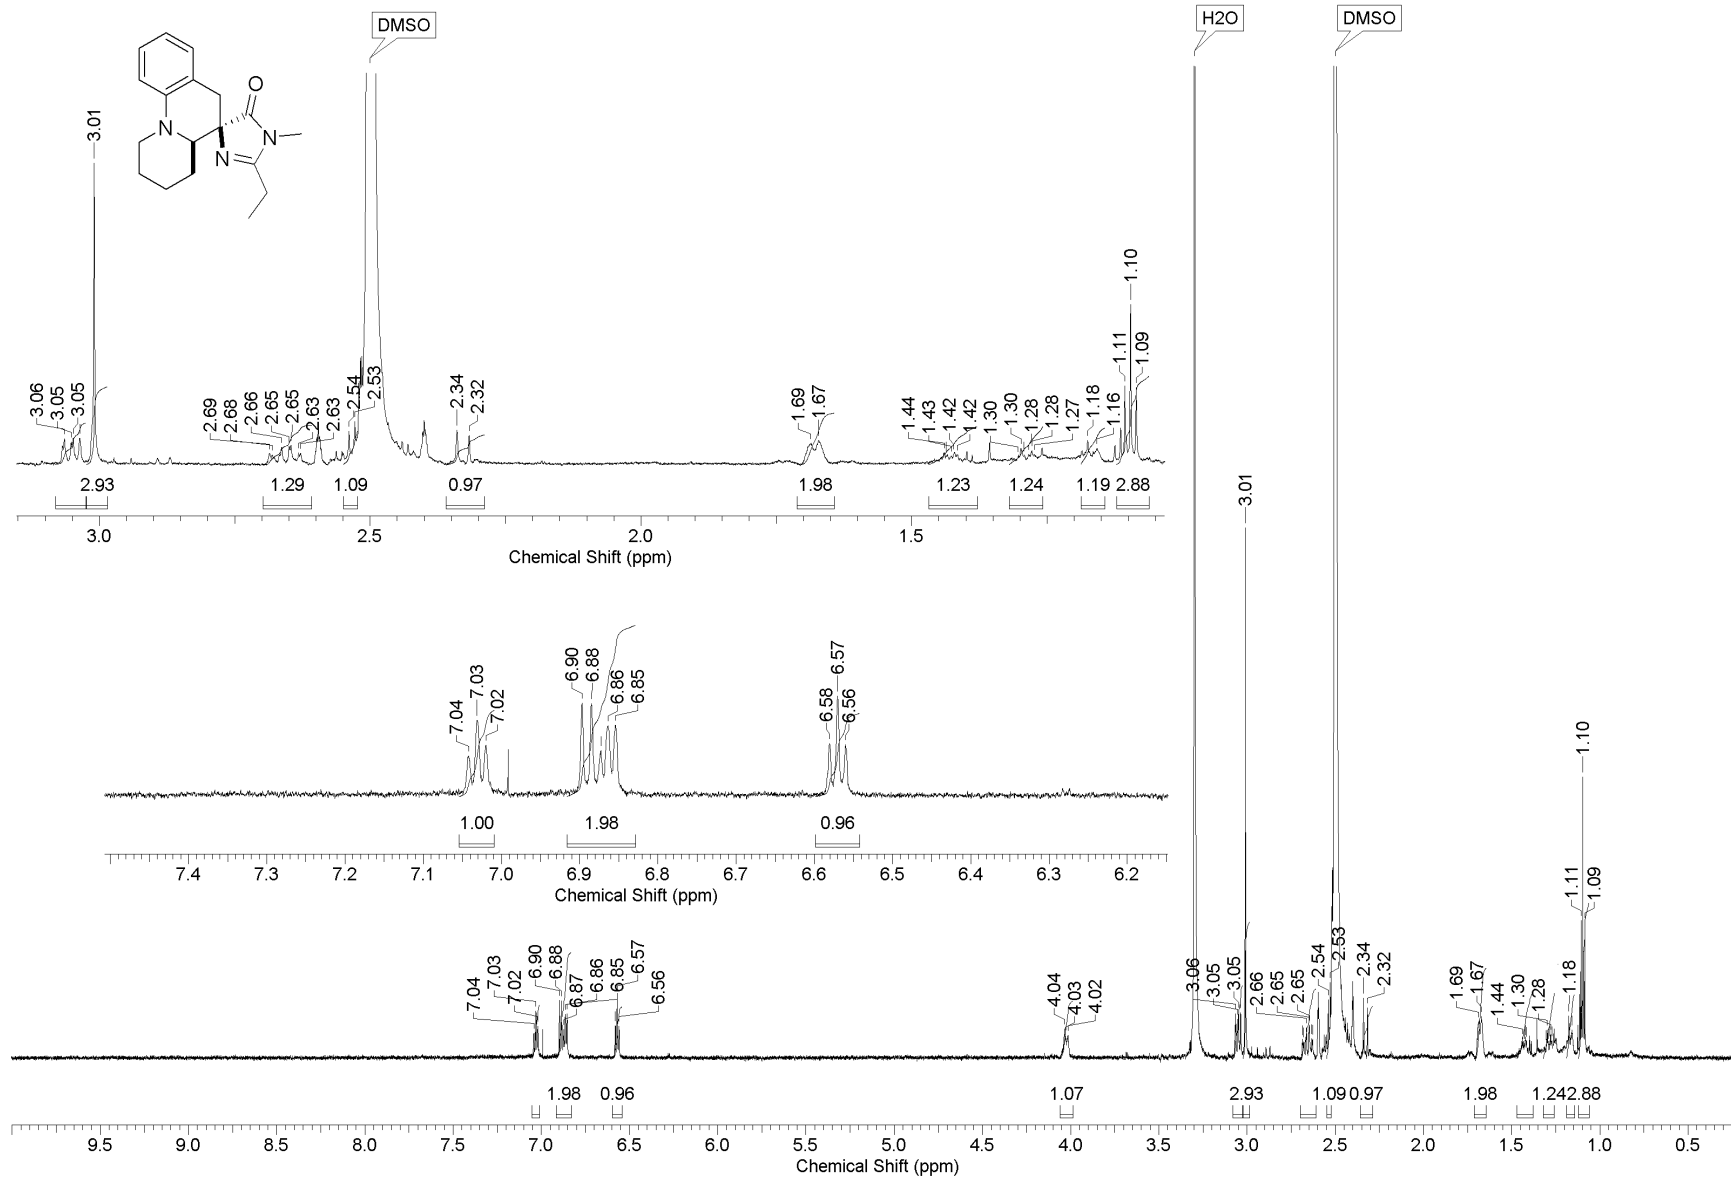

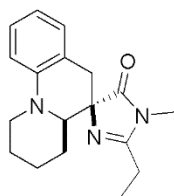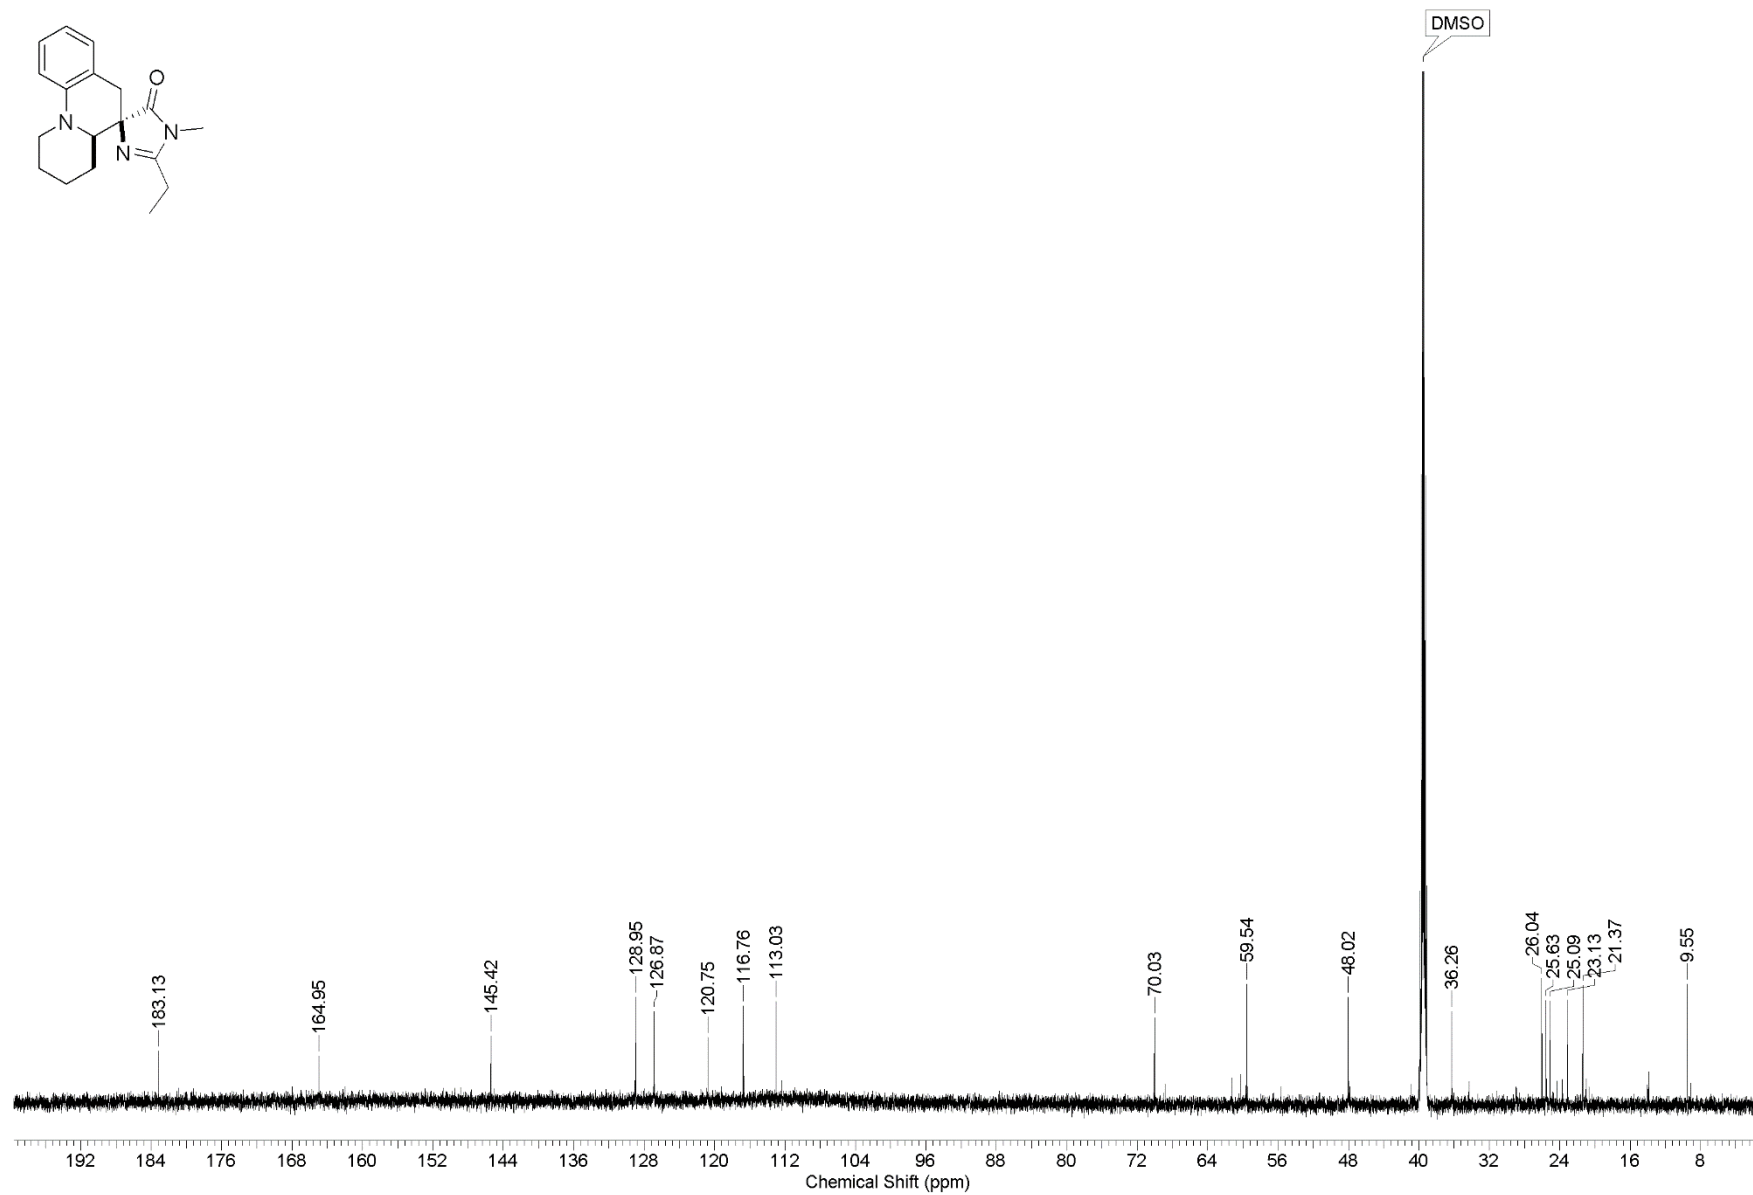

S126

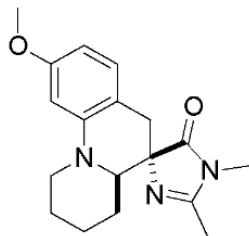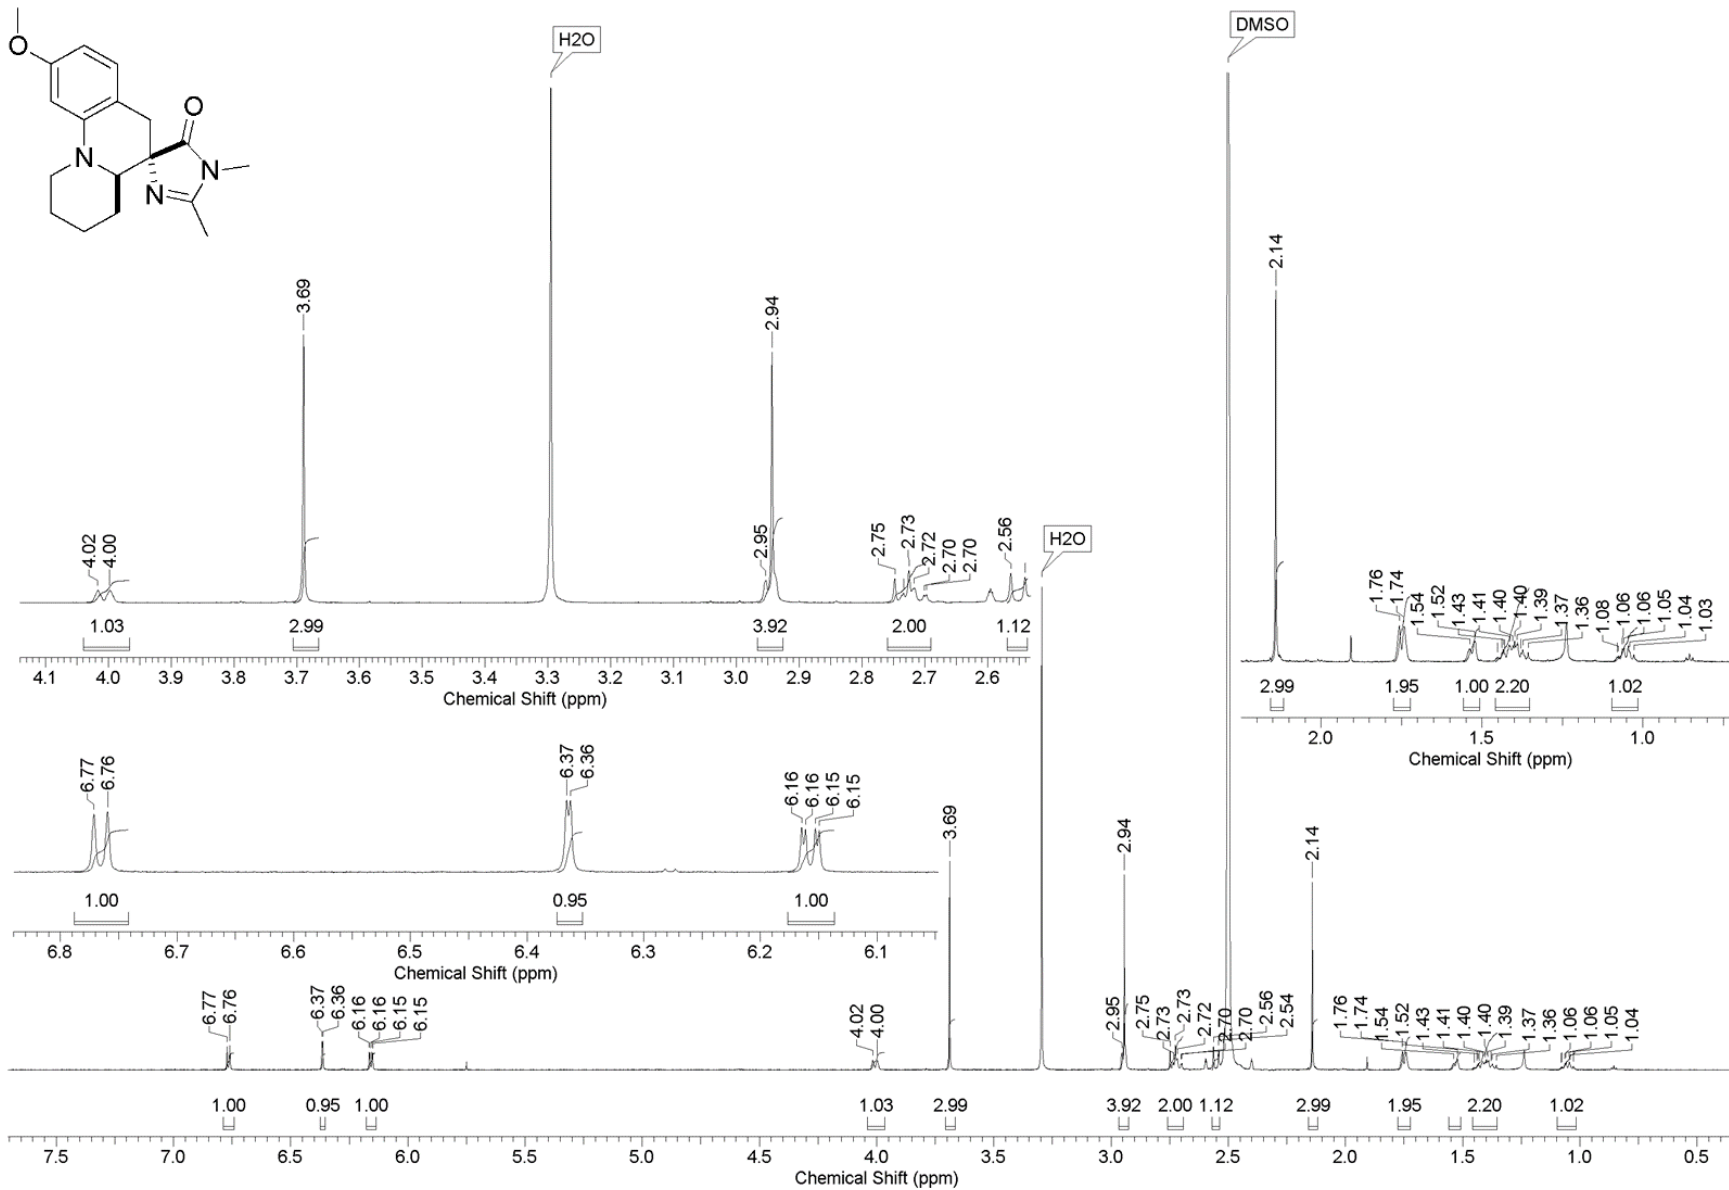

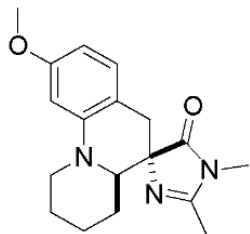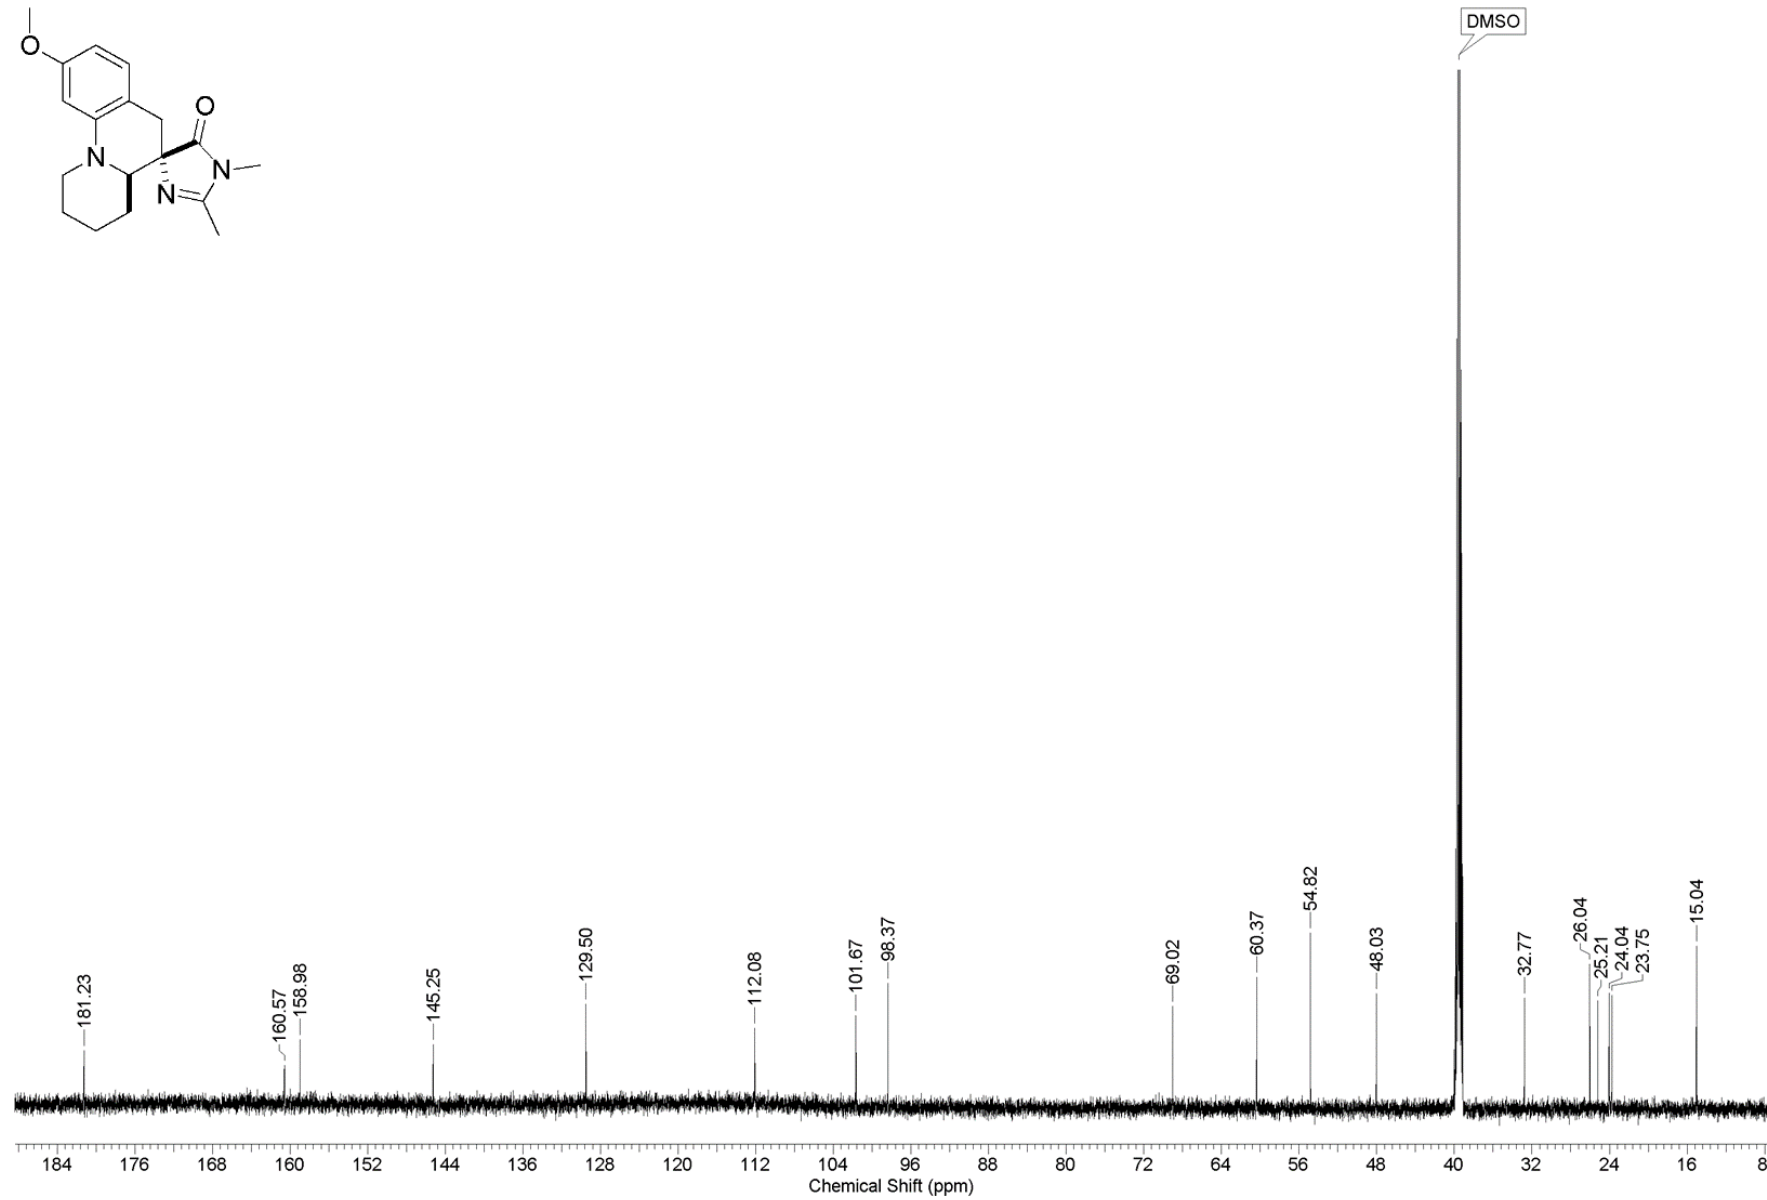

S128



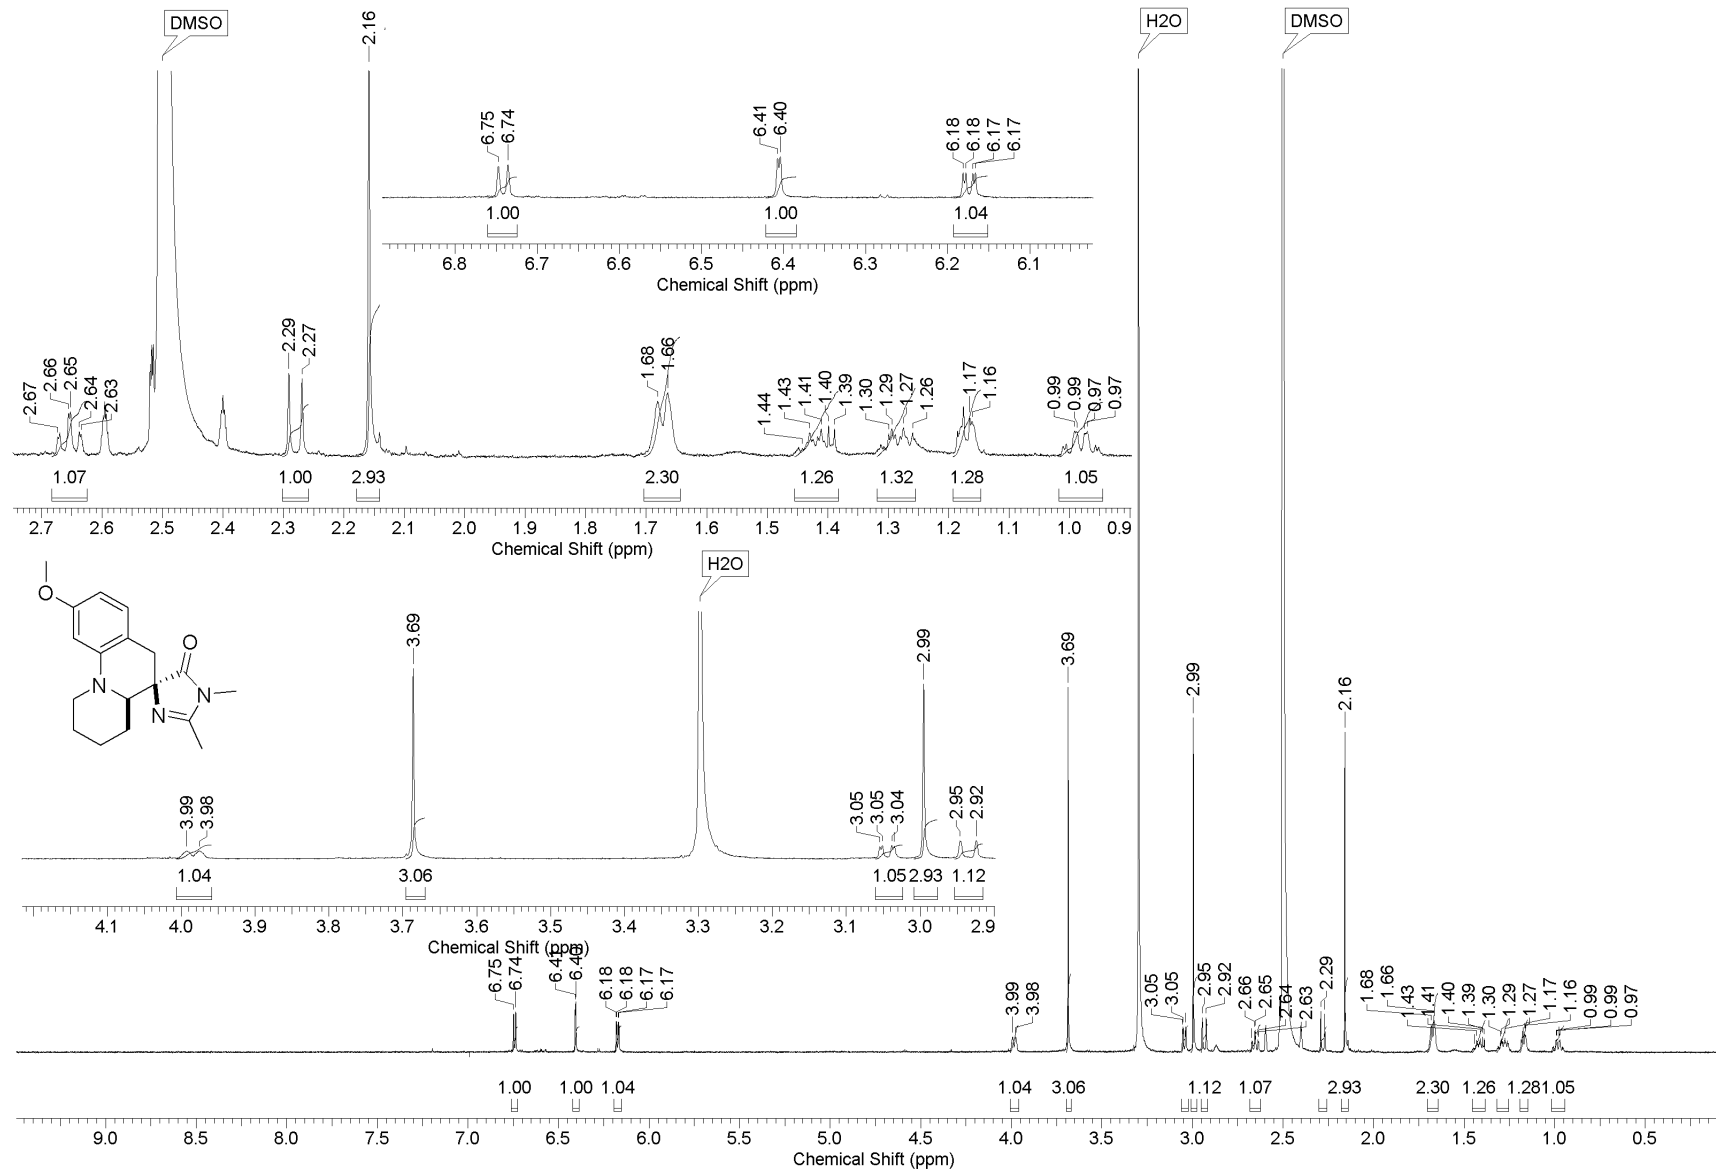

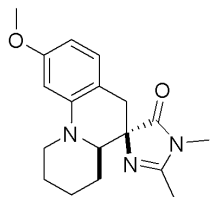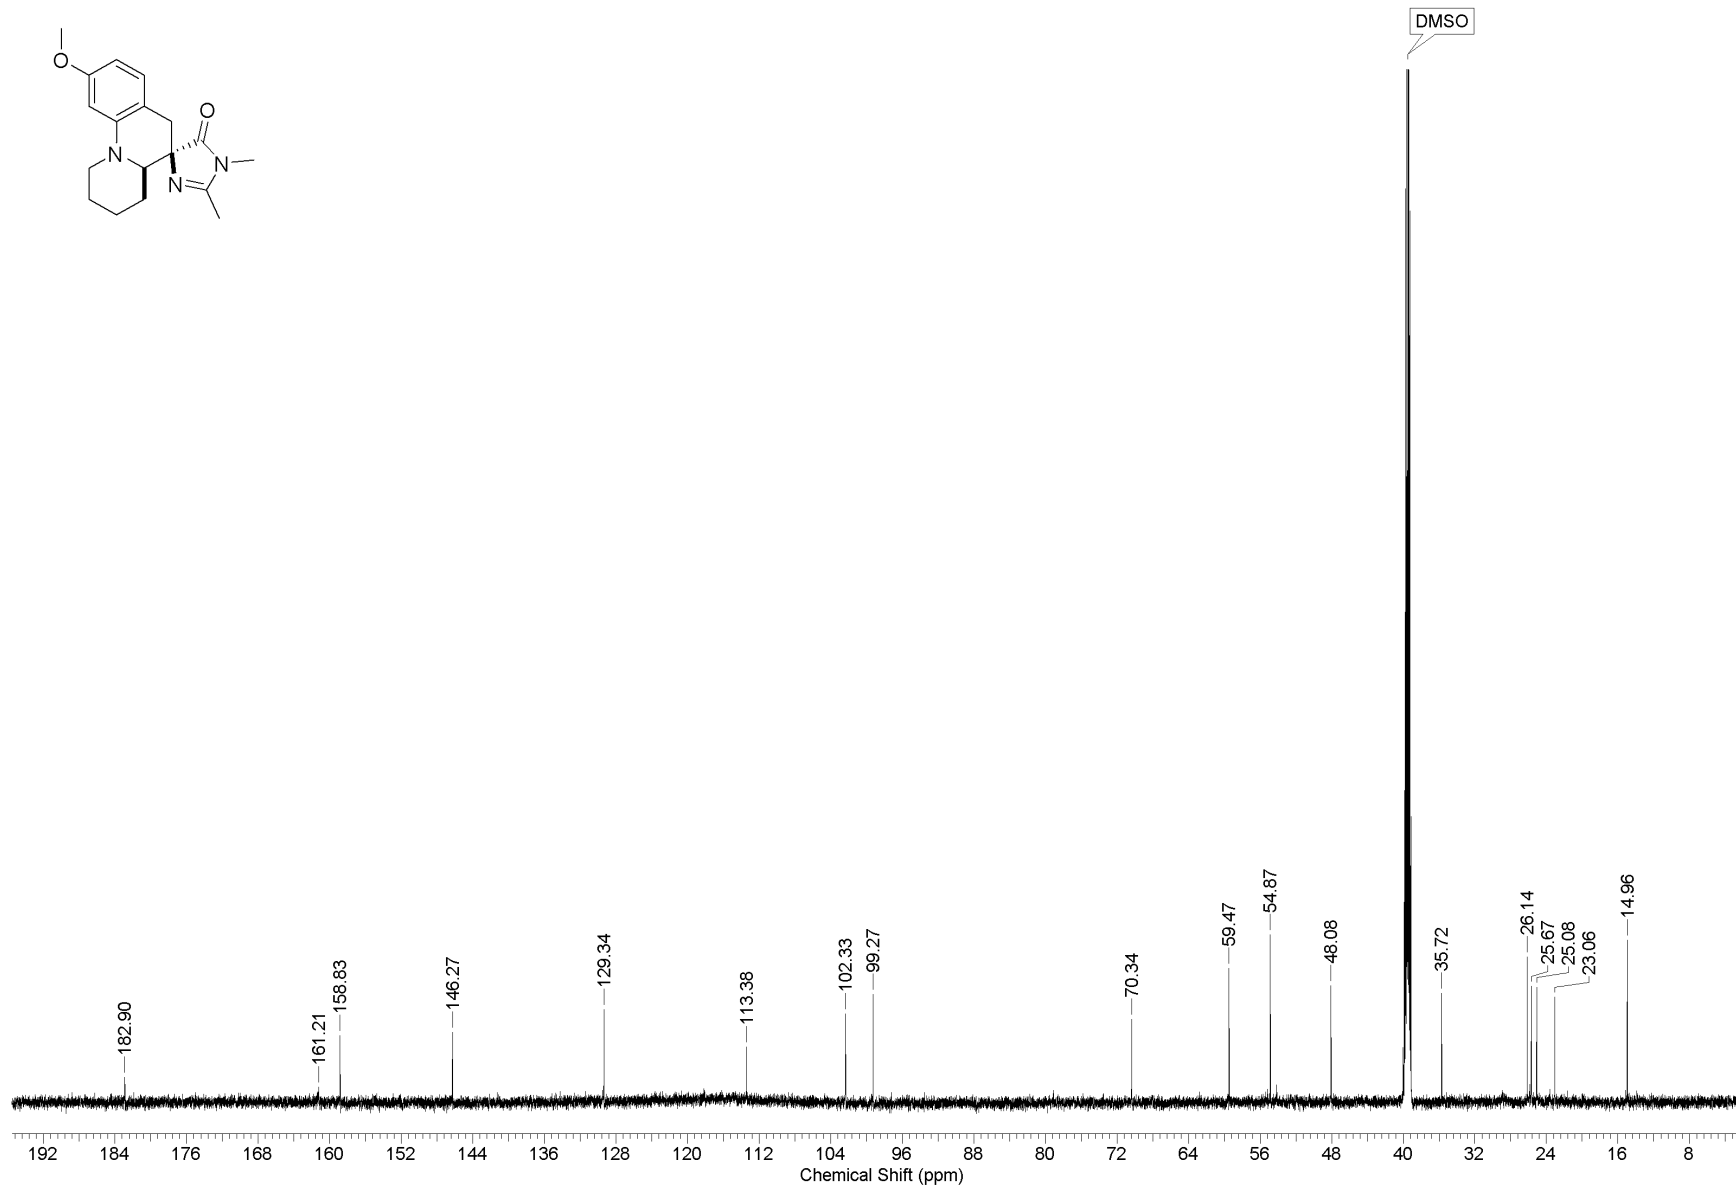

S130

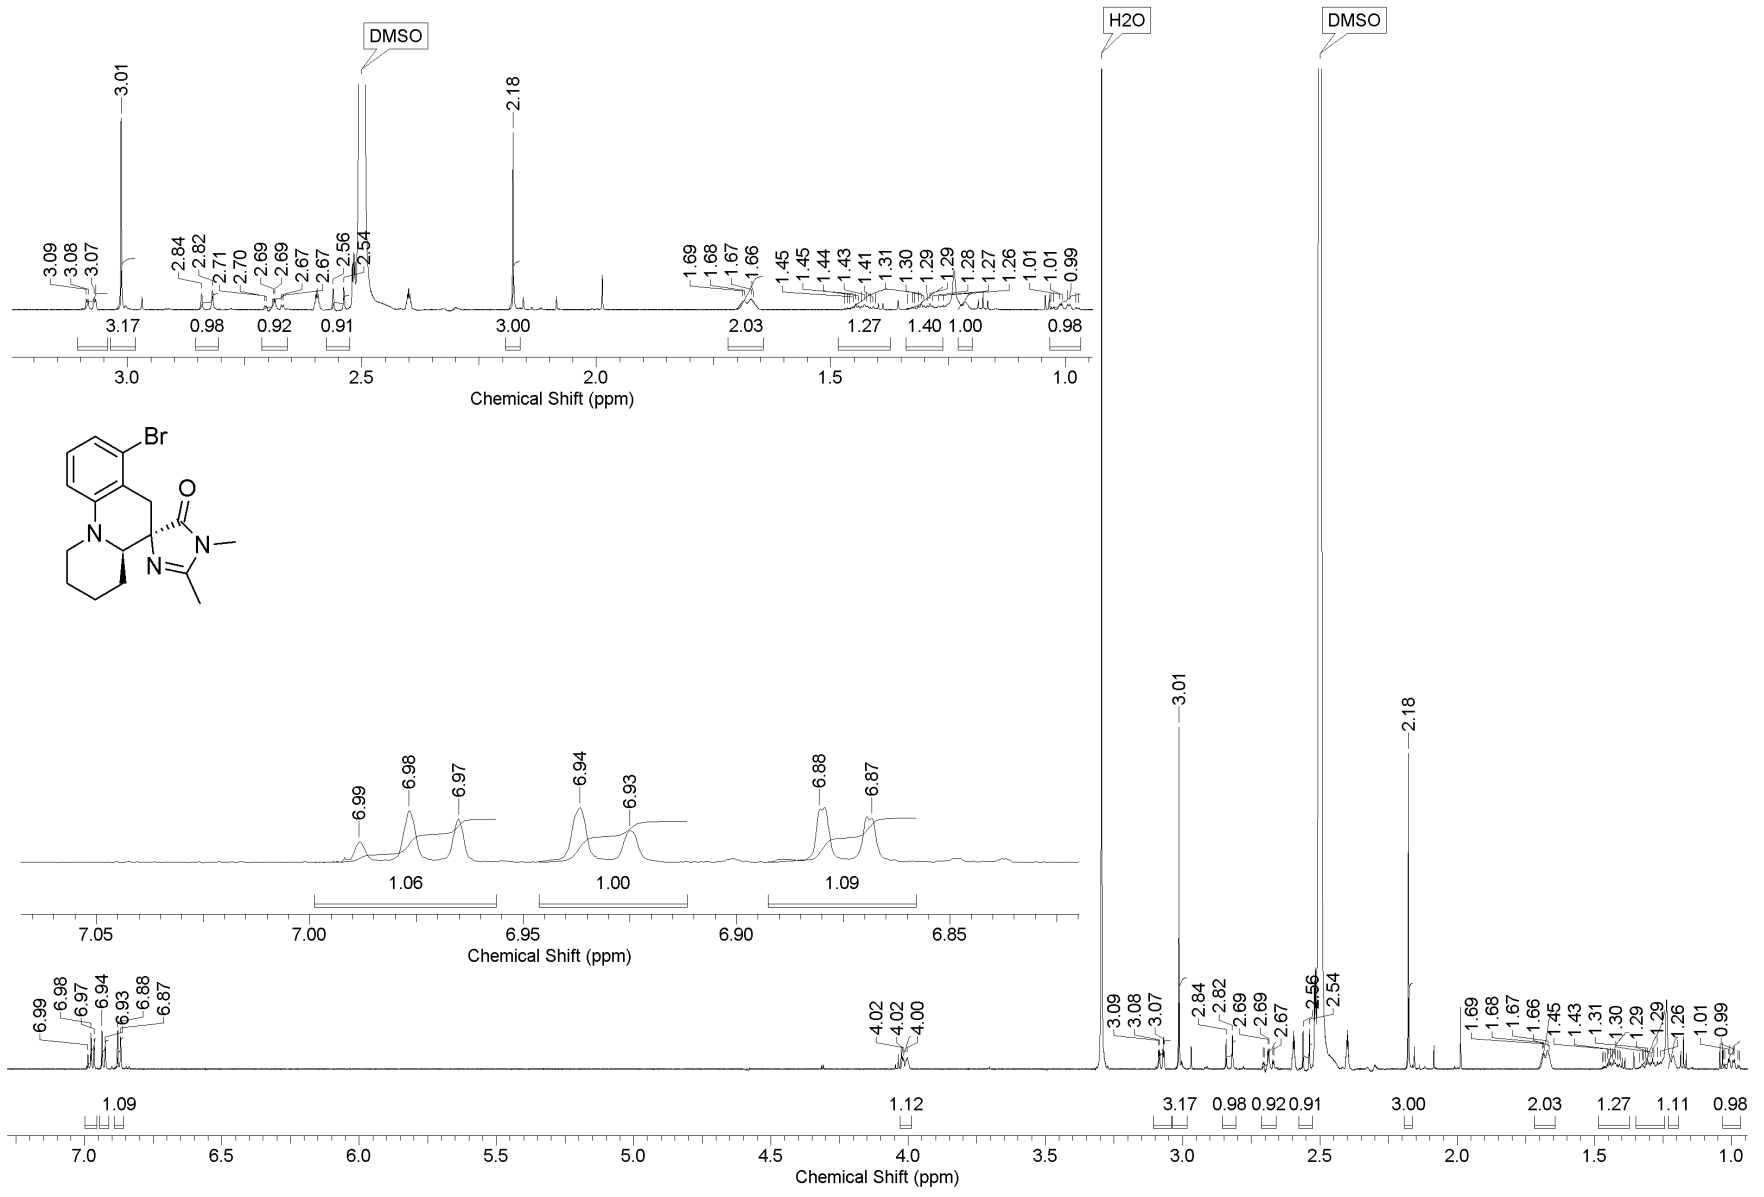

S131

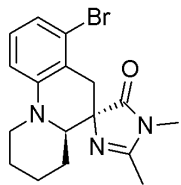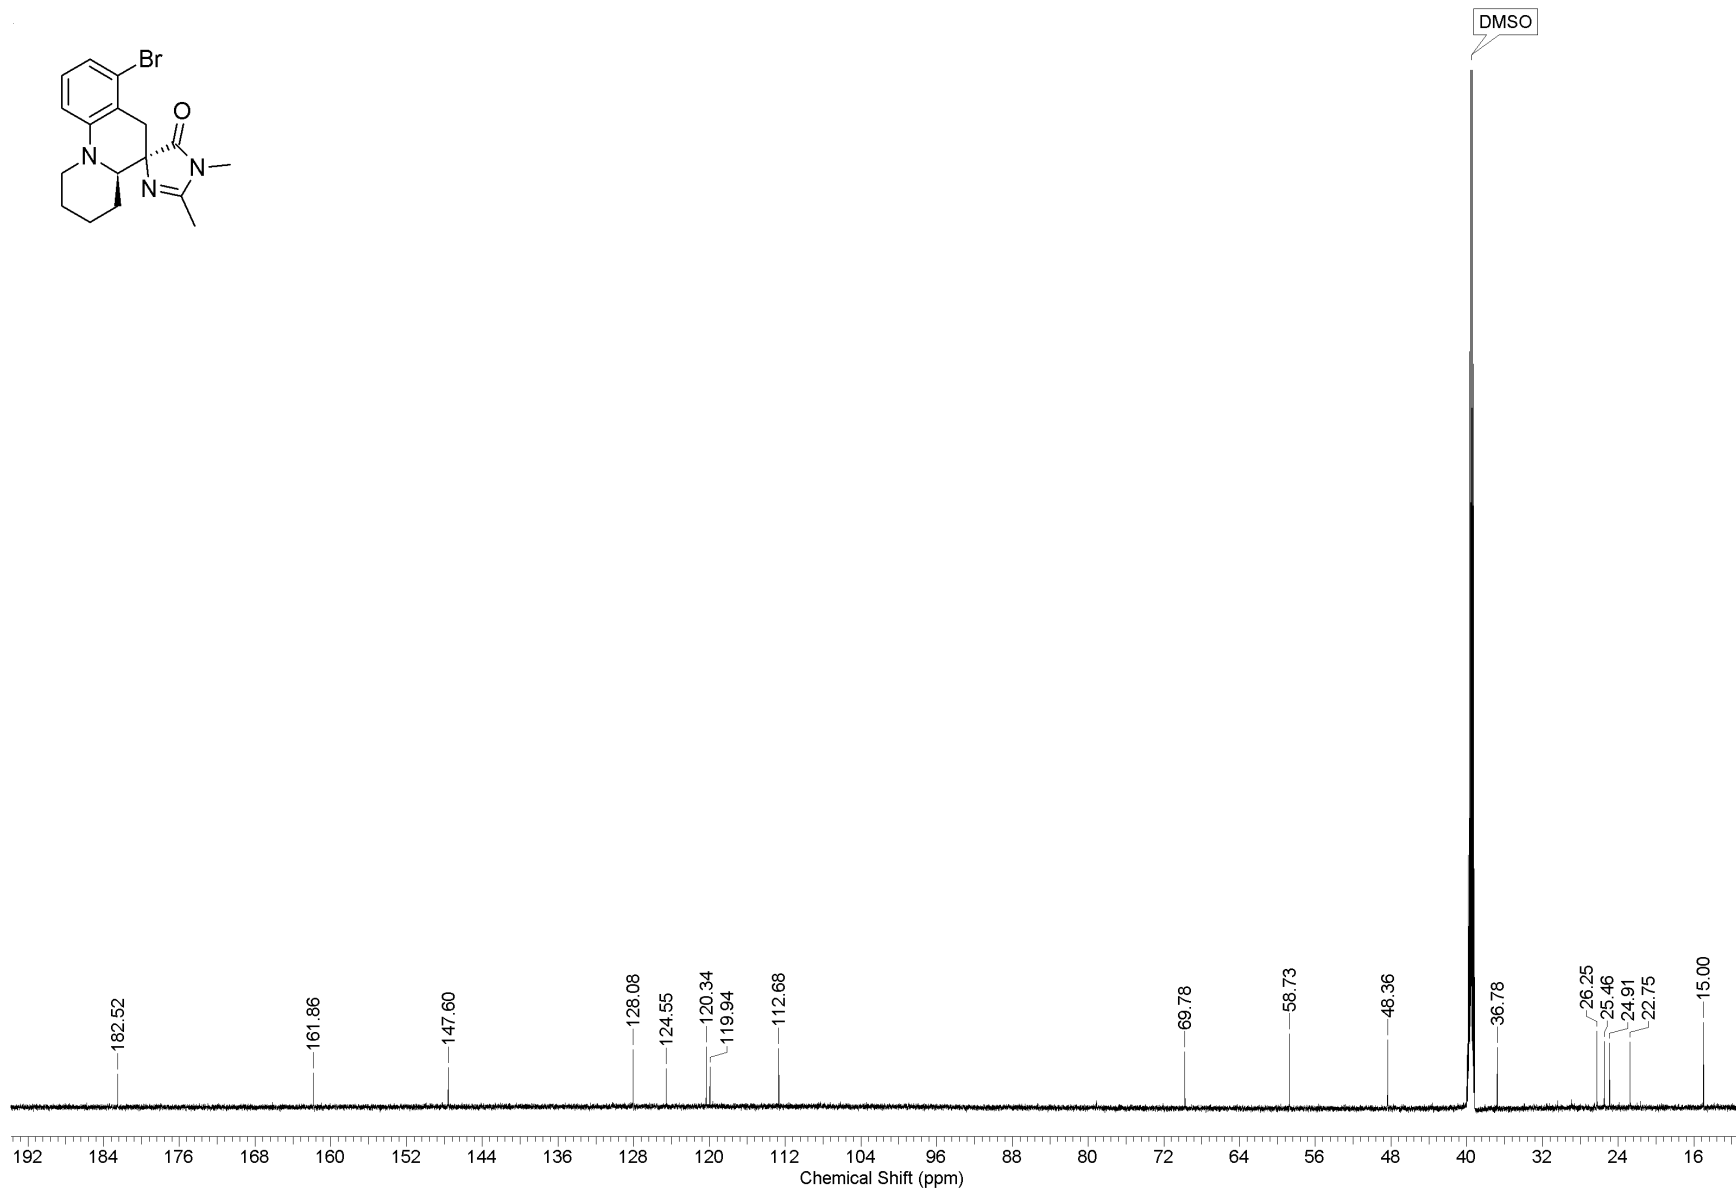

S132

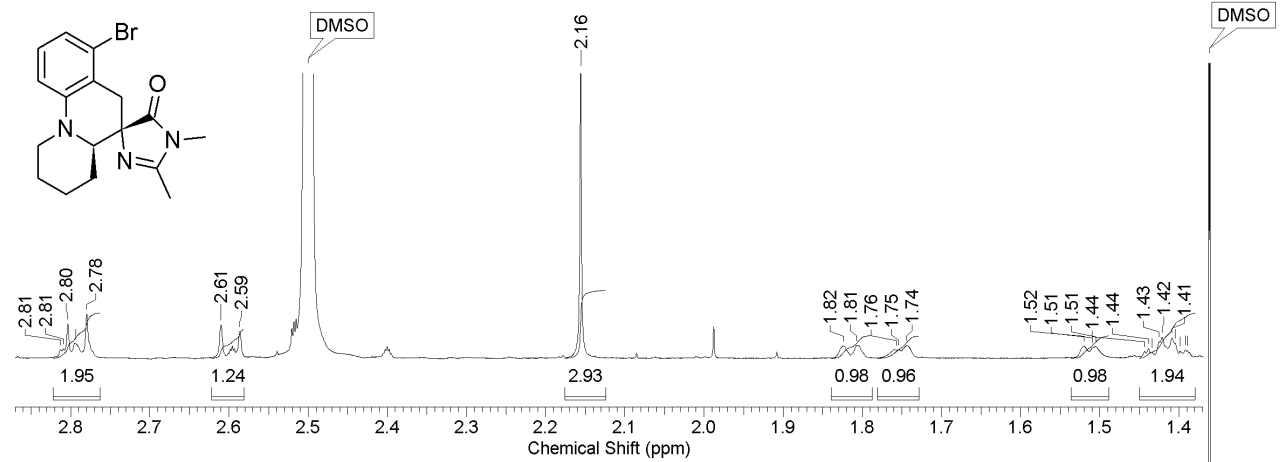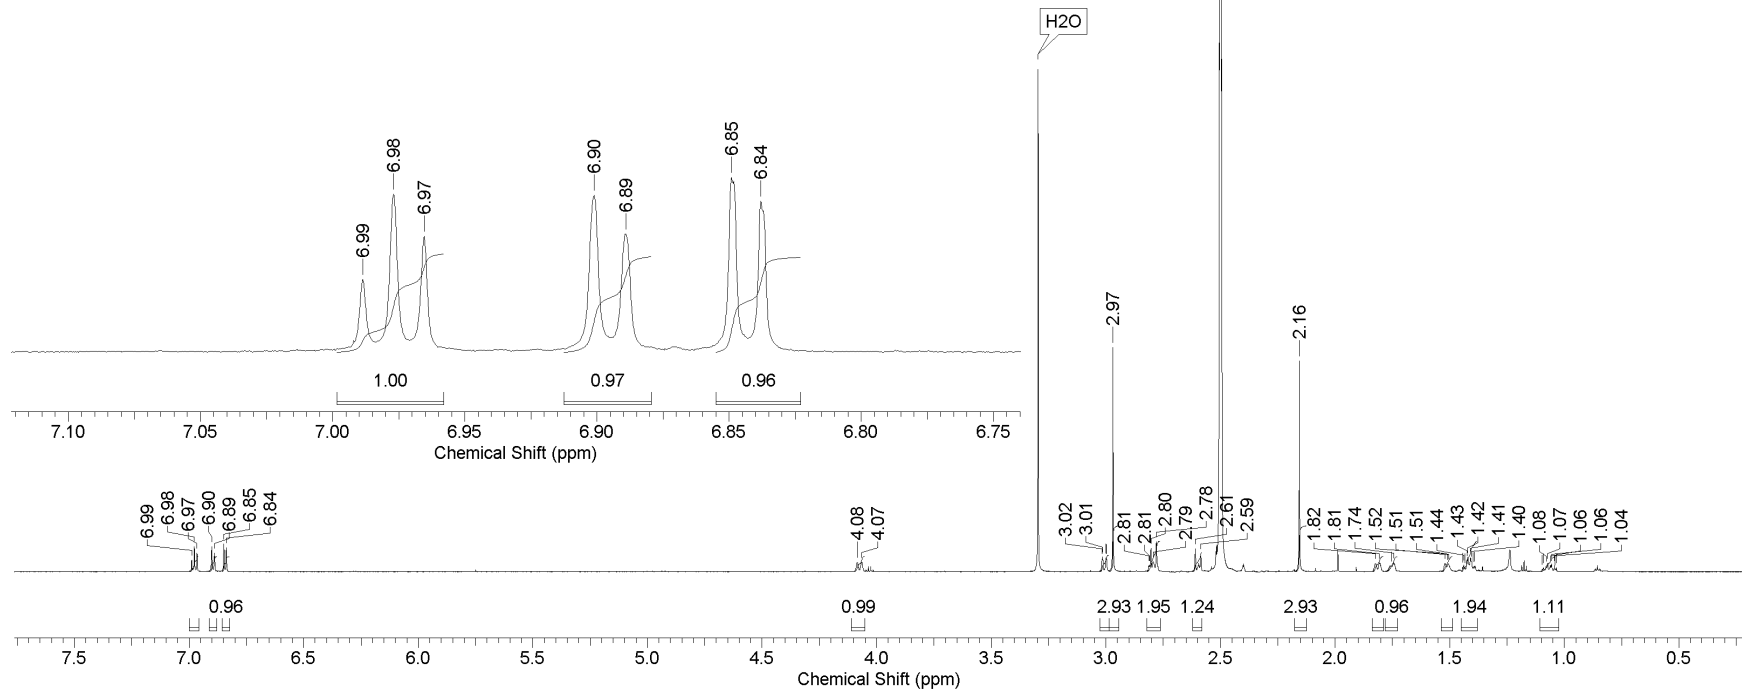

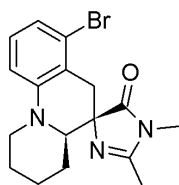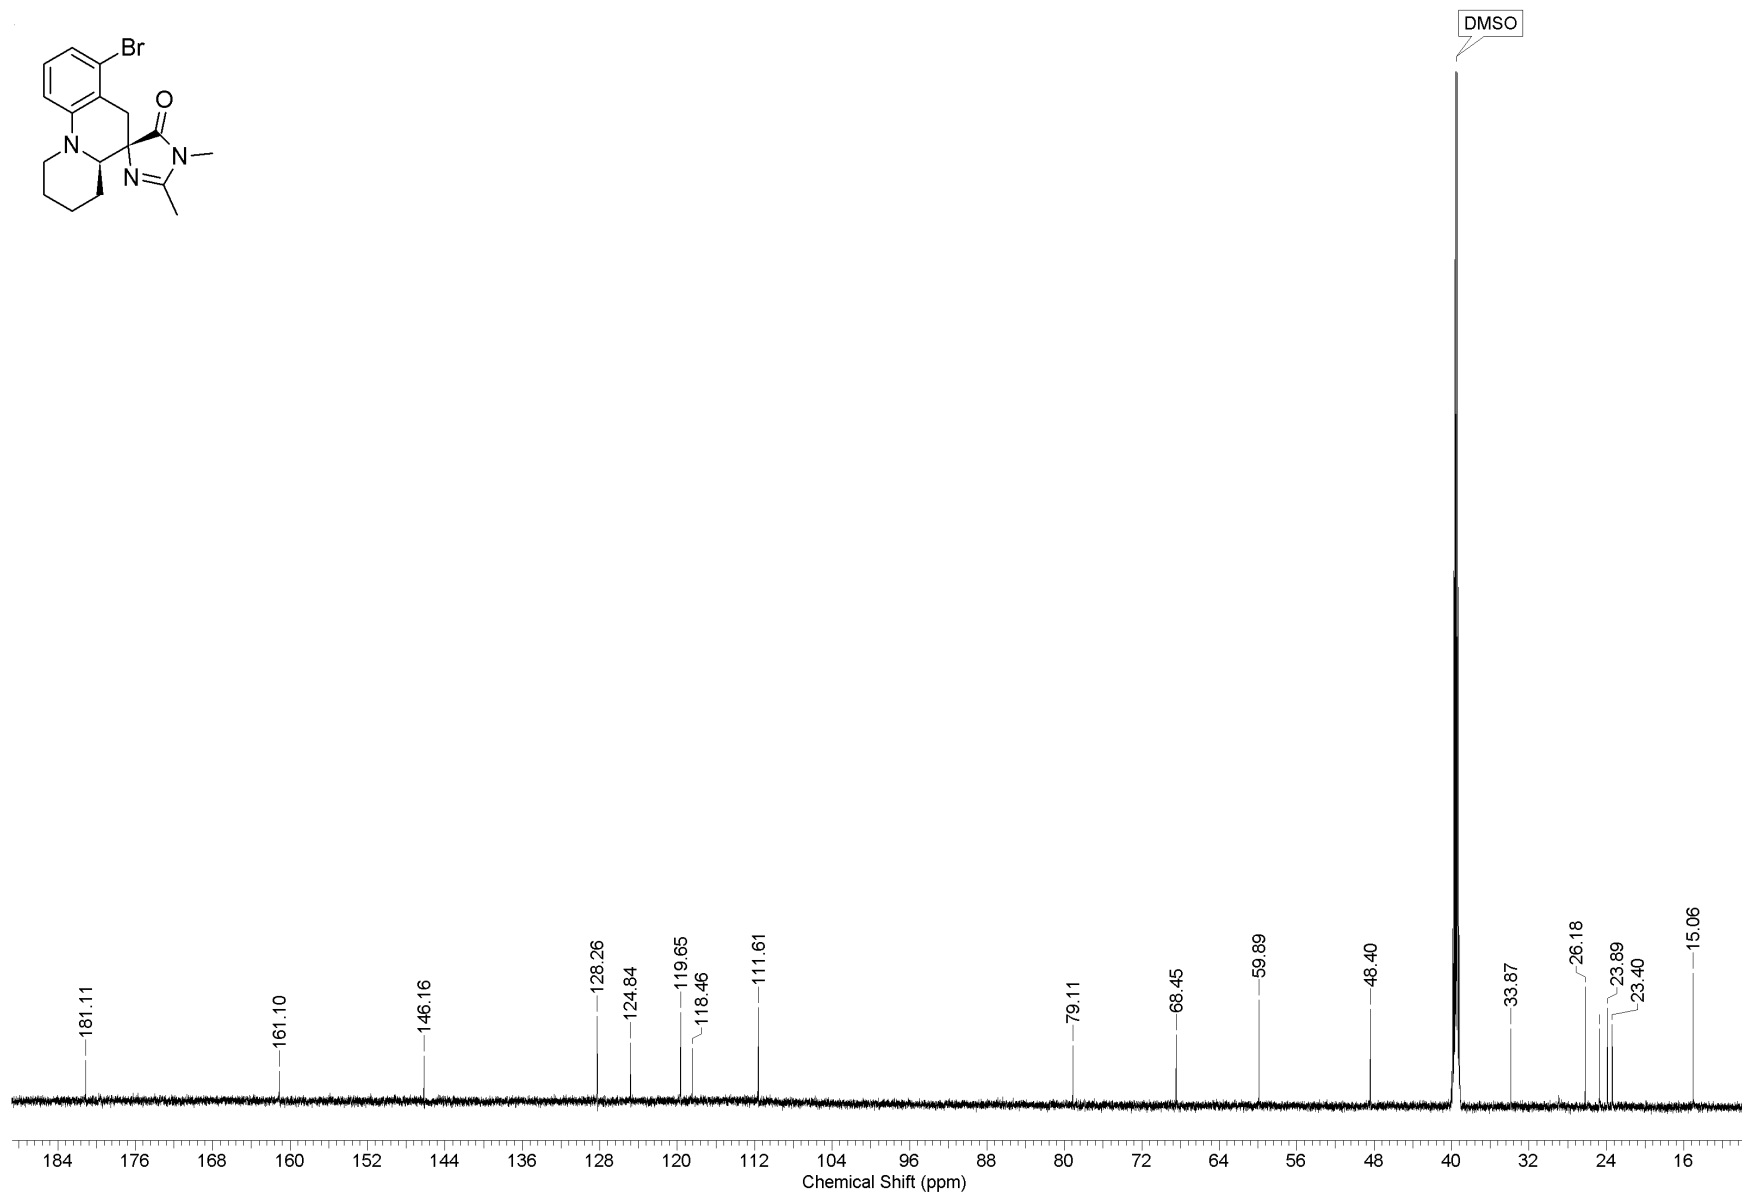

S134

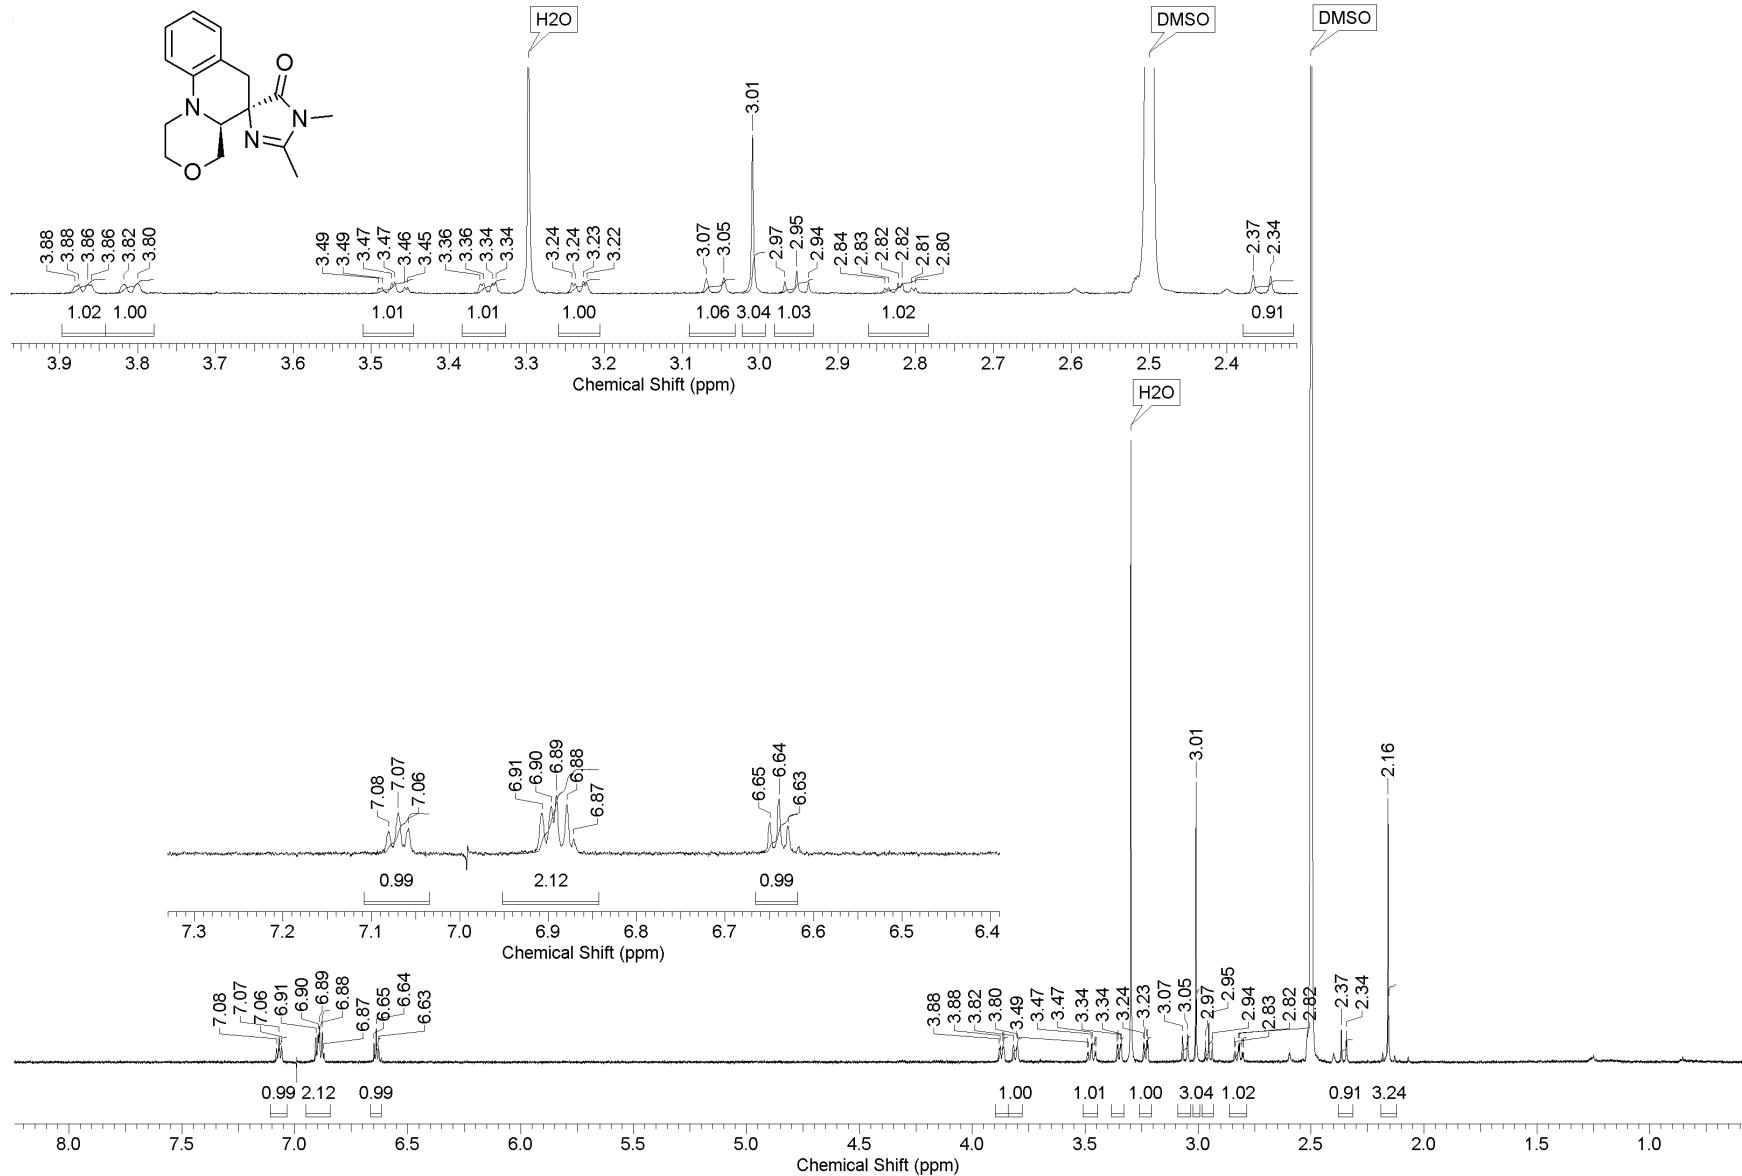

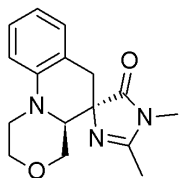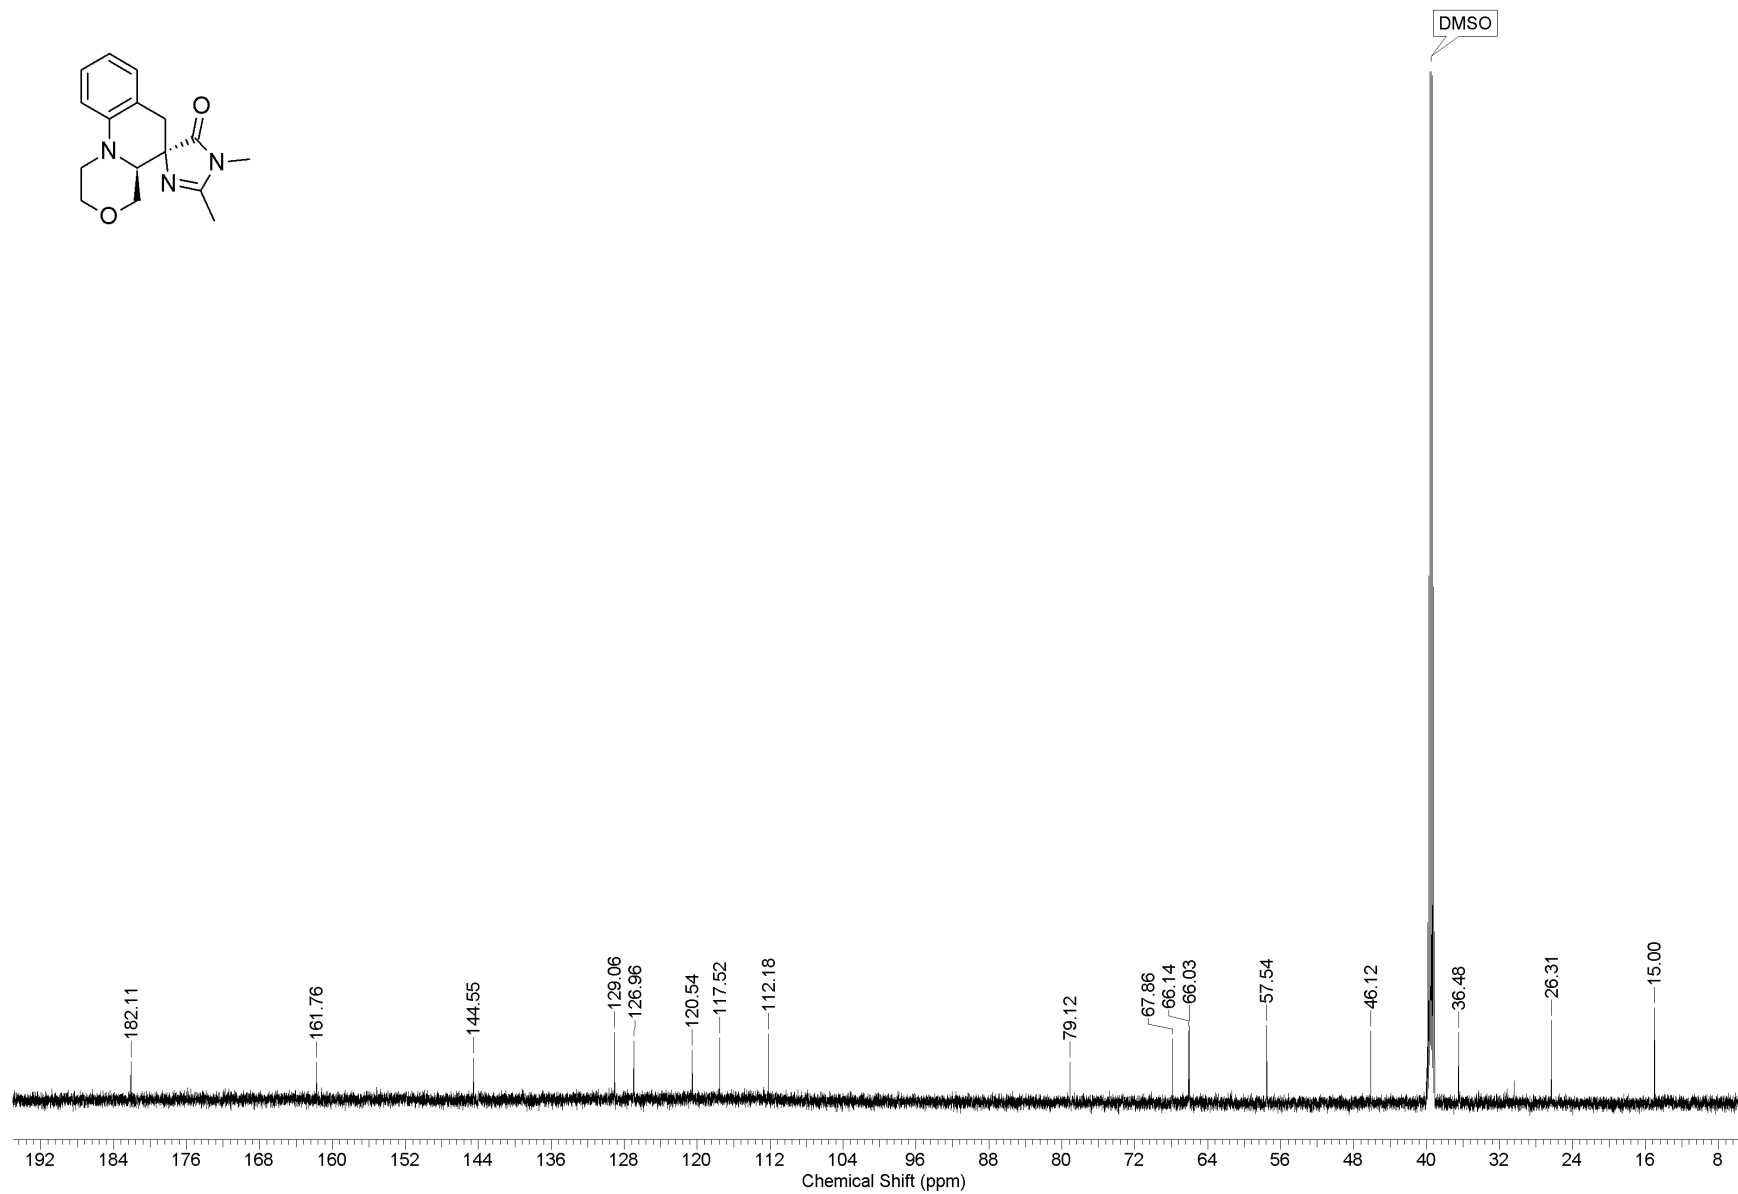

S136



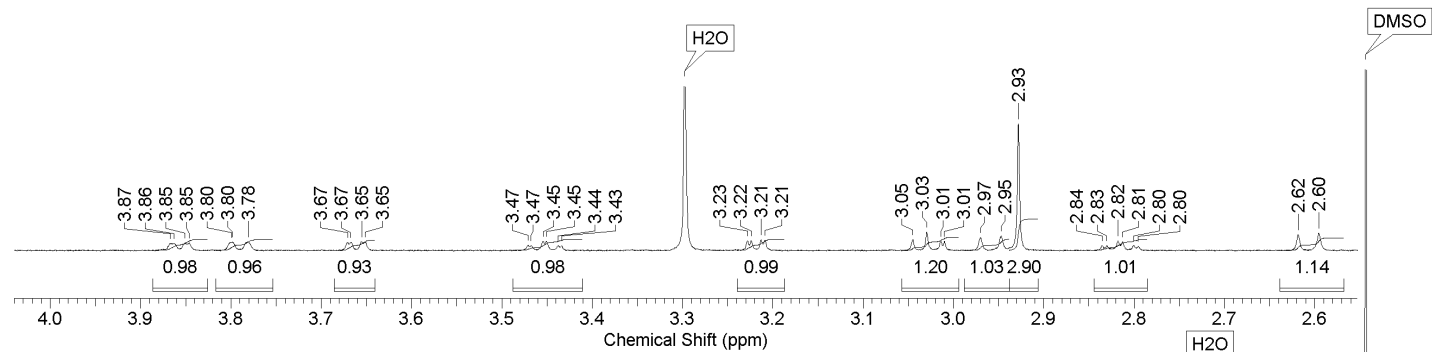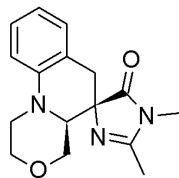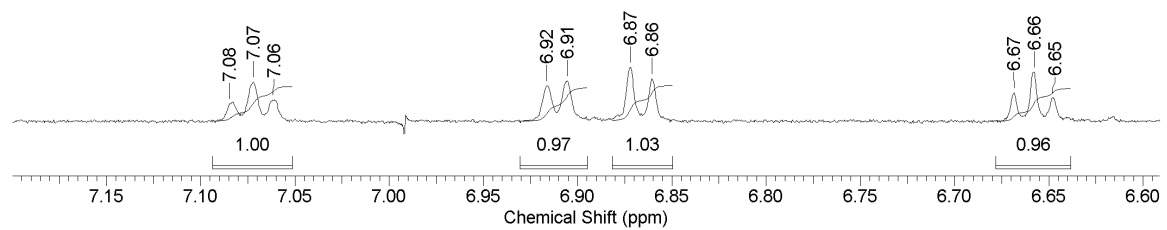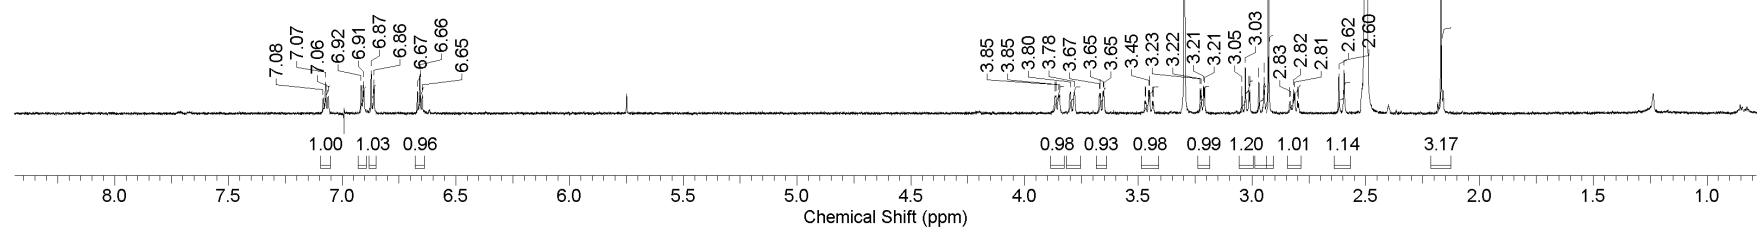

S137

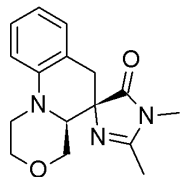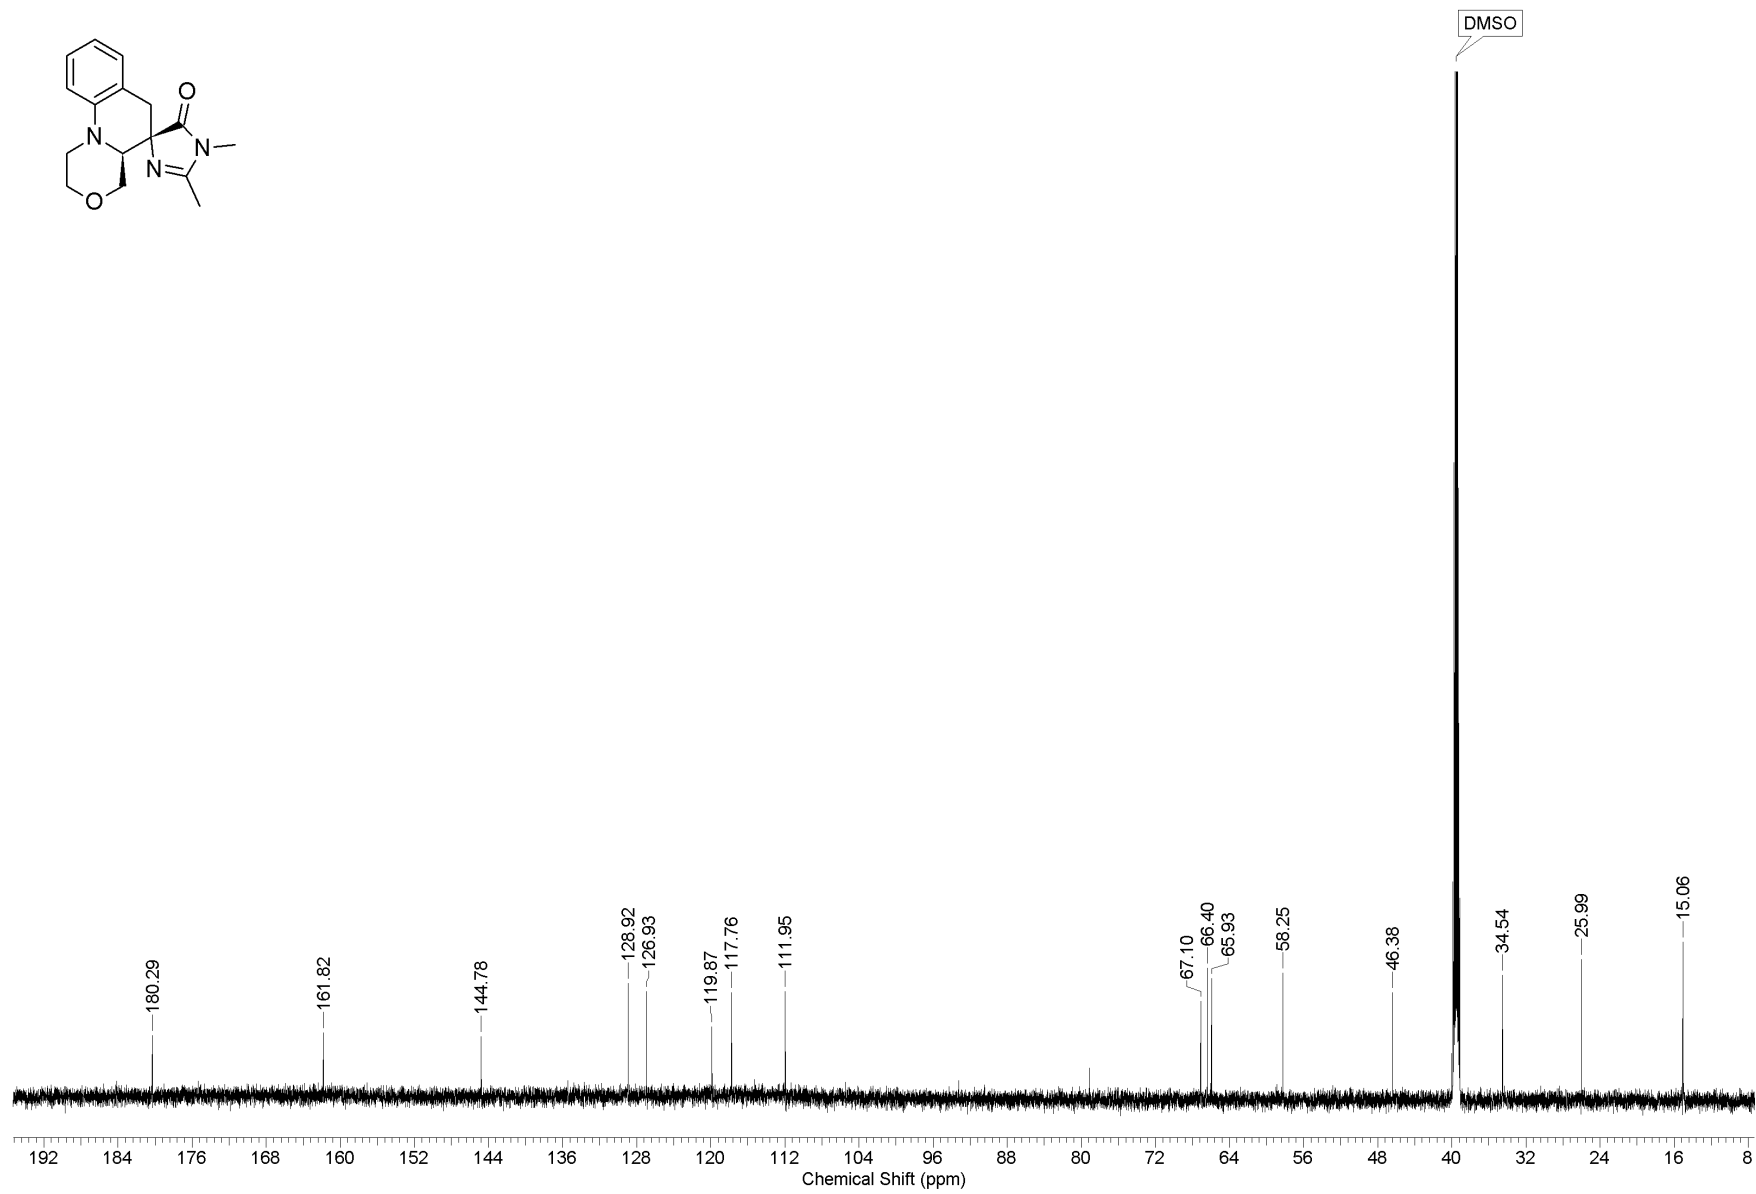

S138

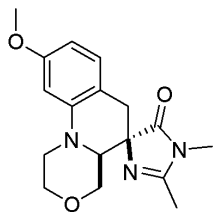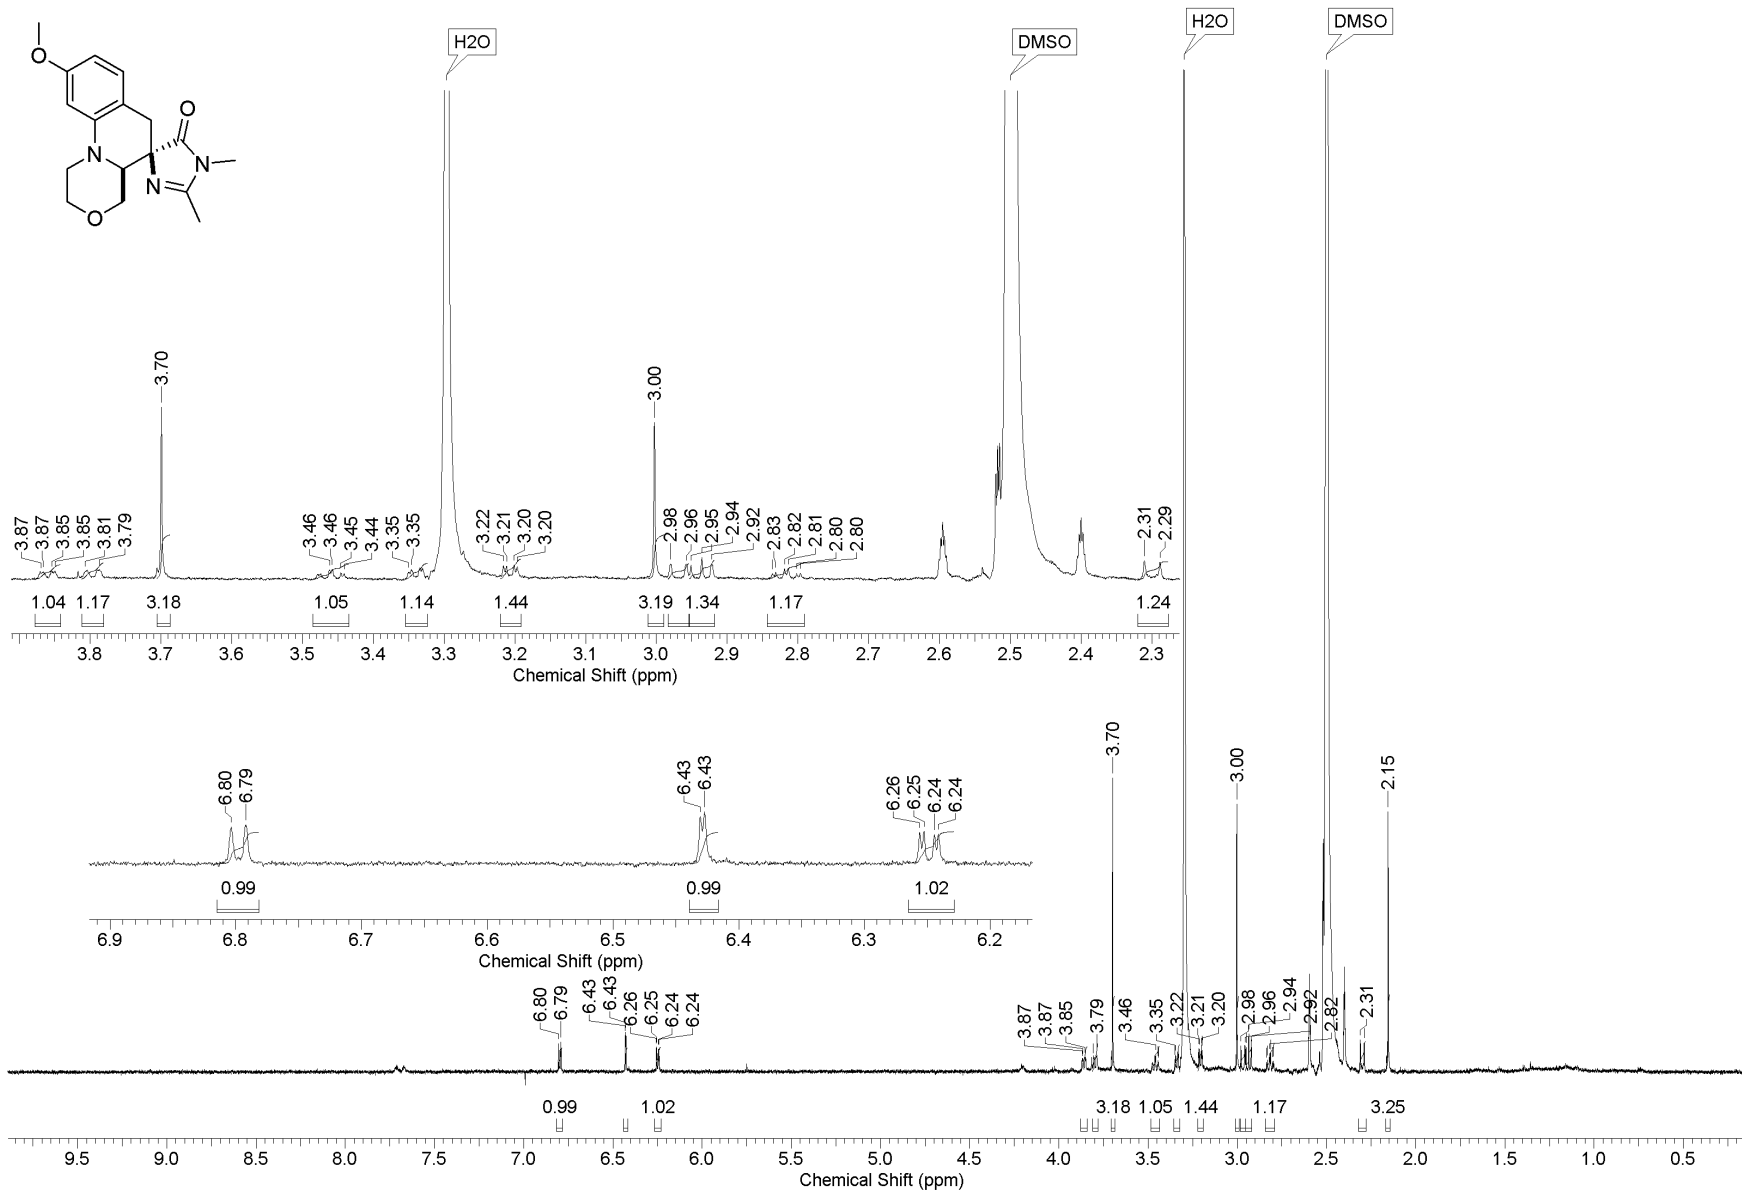

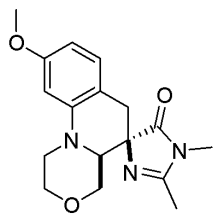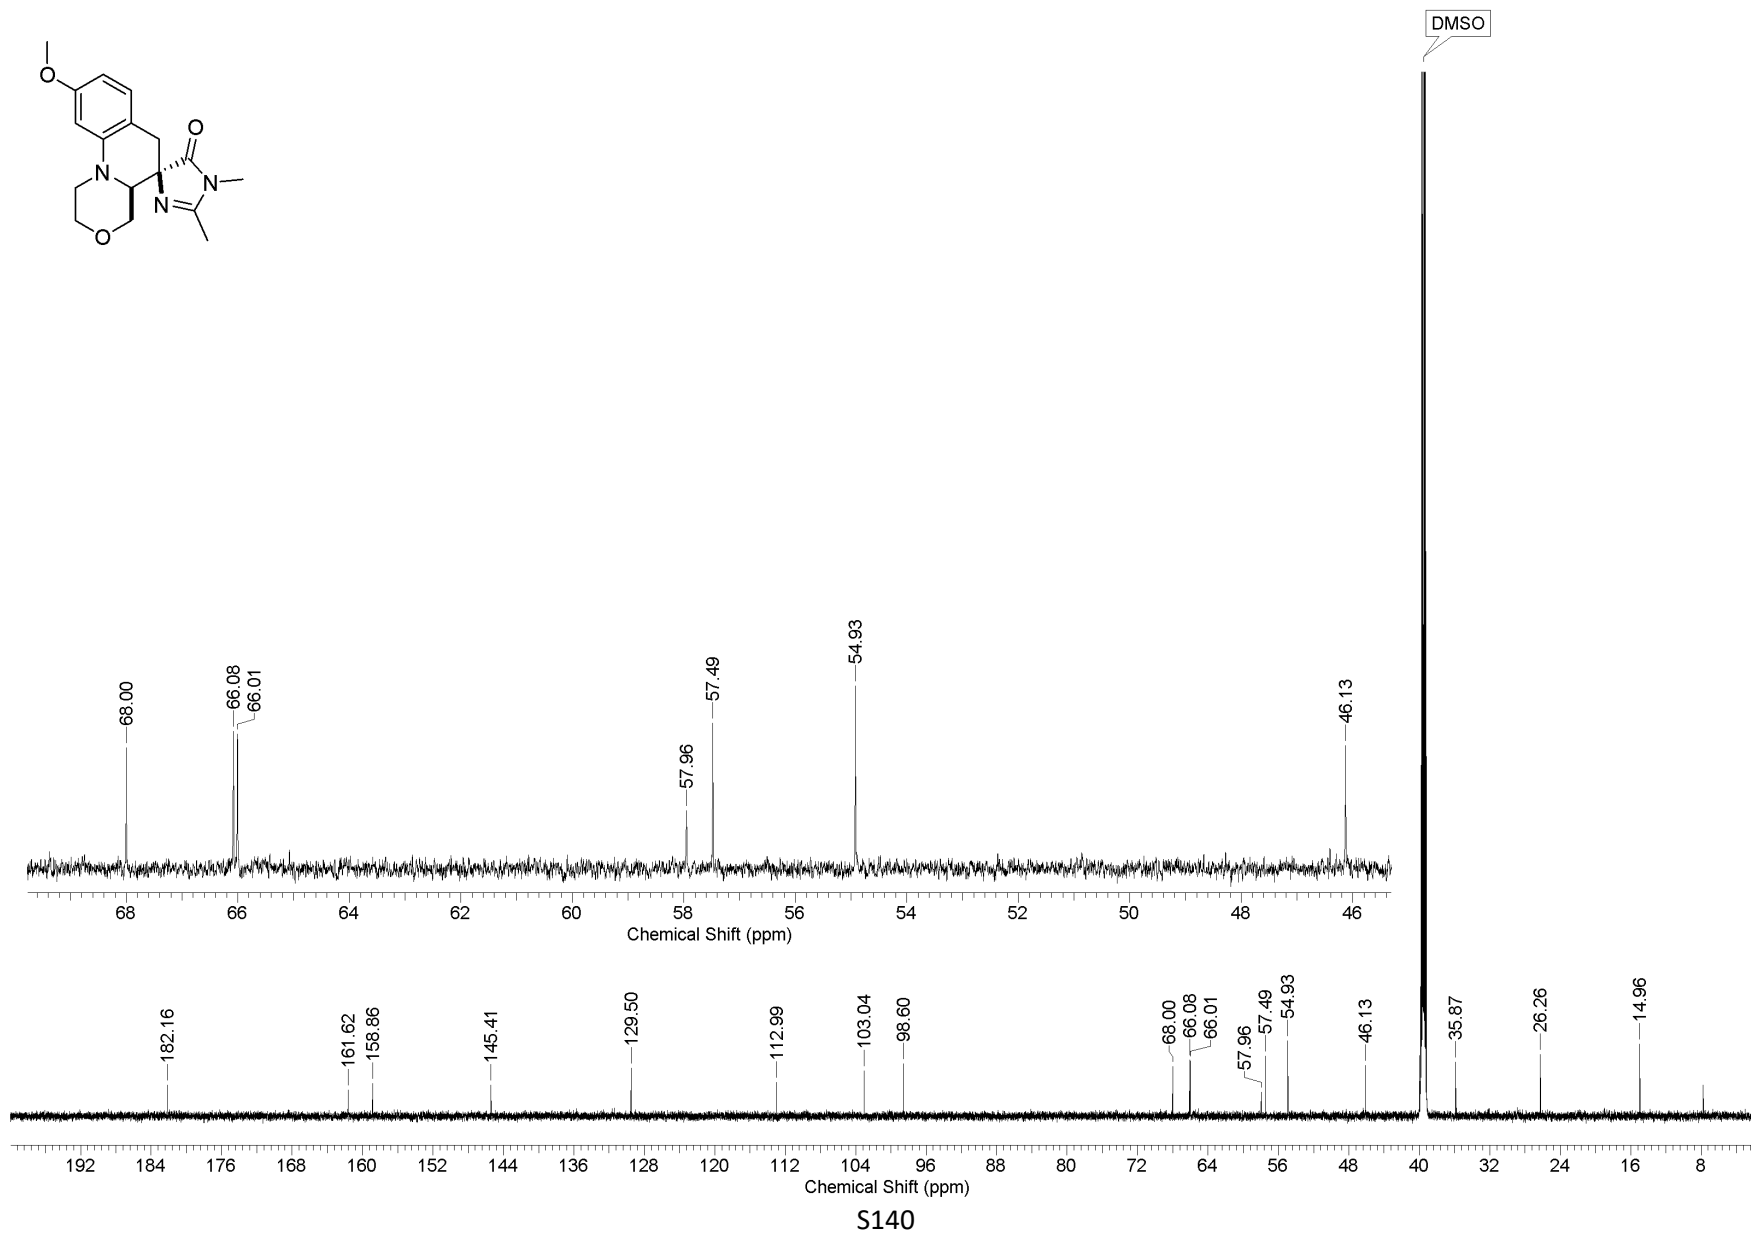

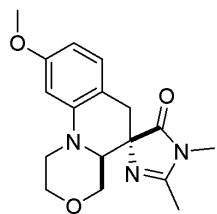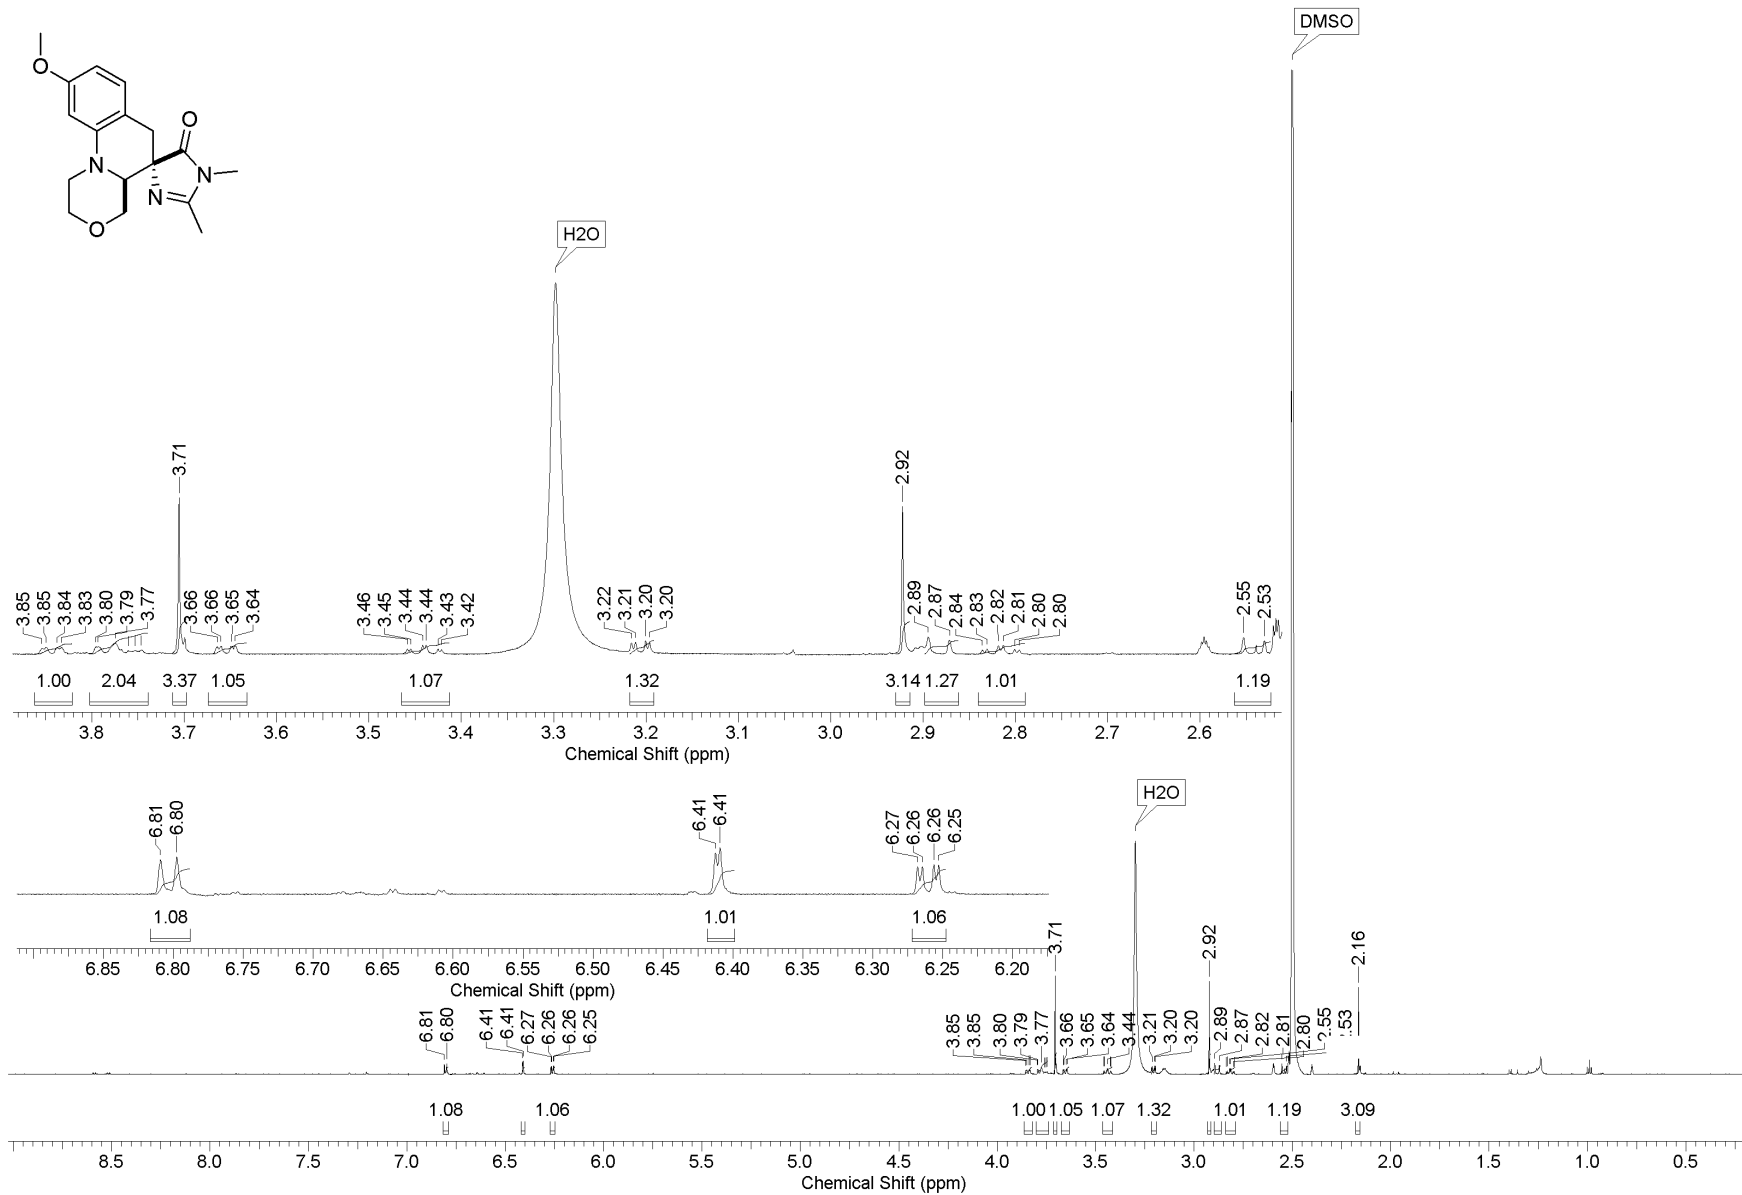

S141

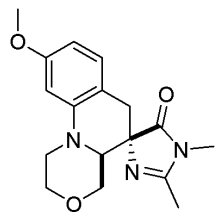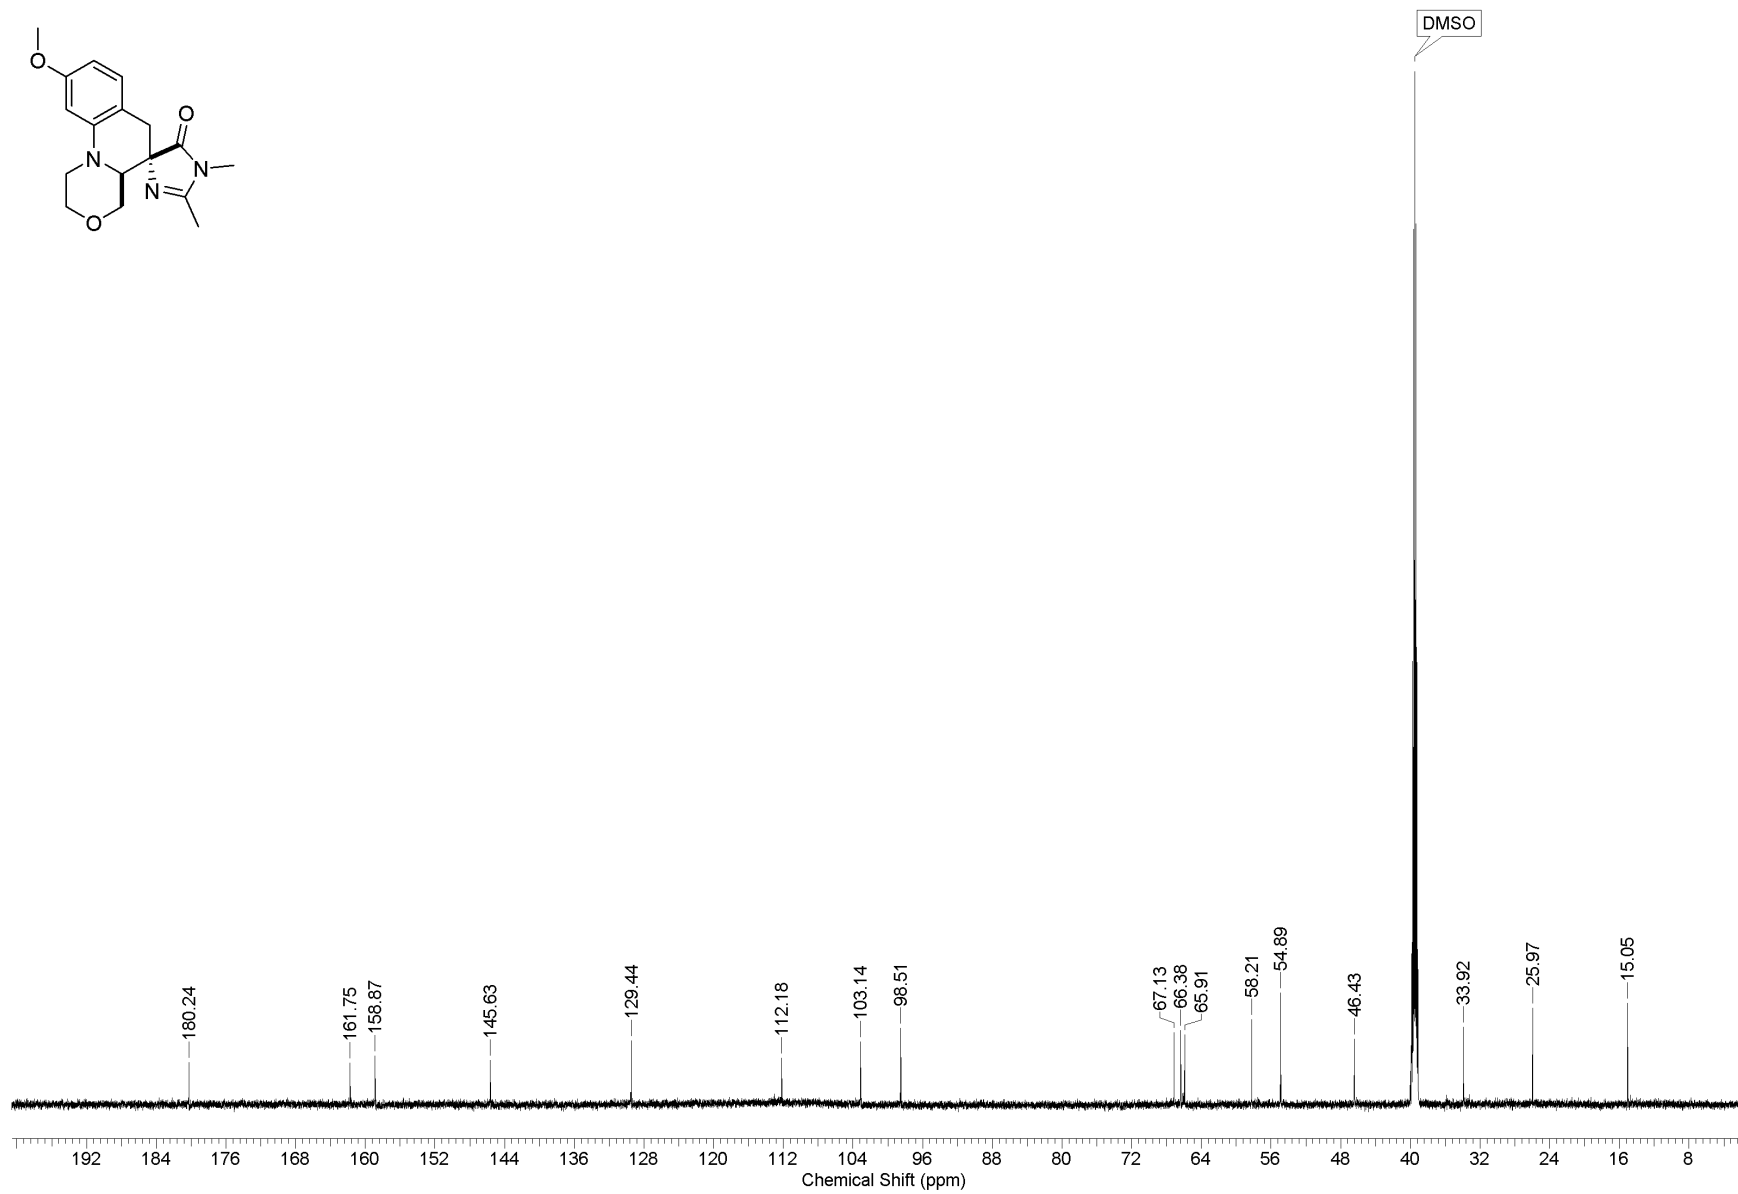

S142

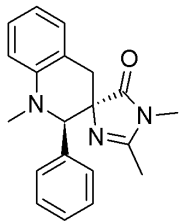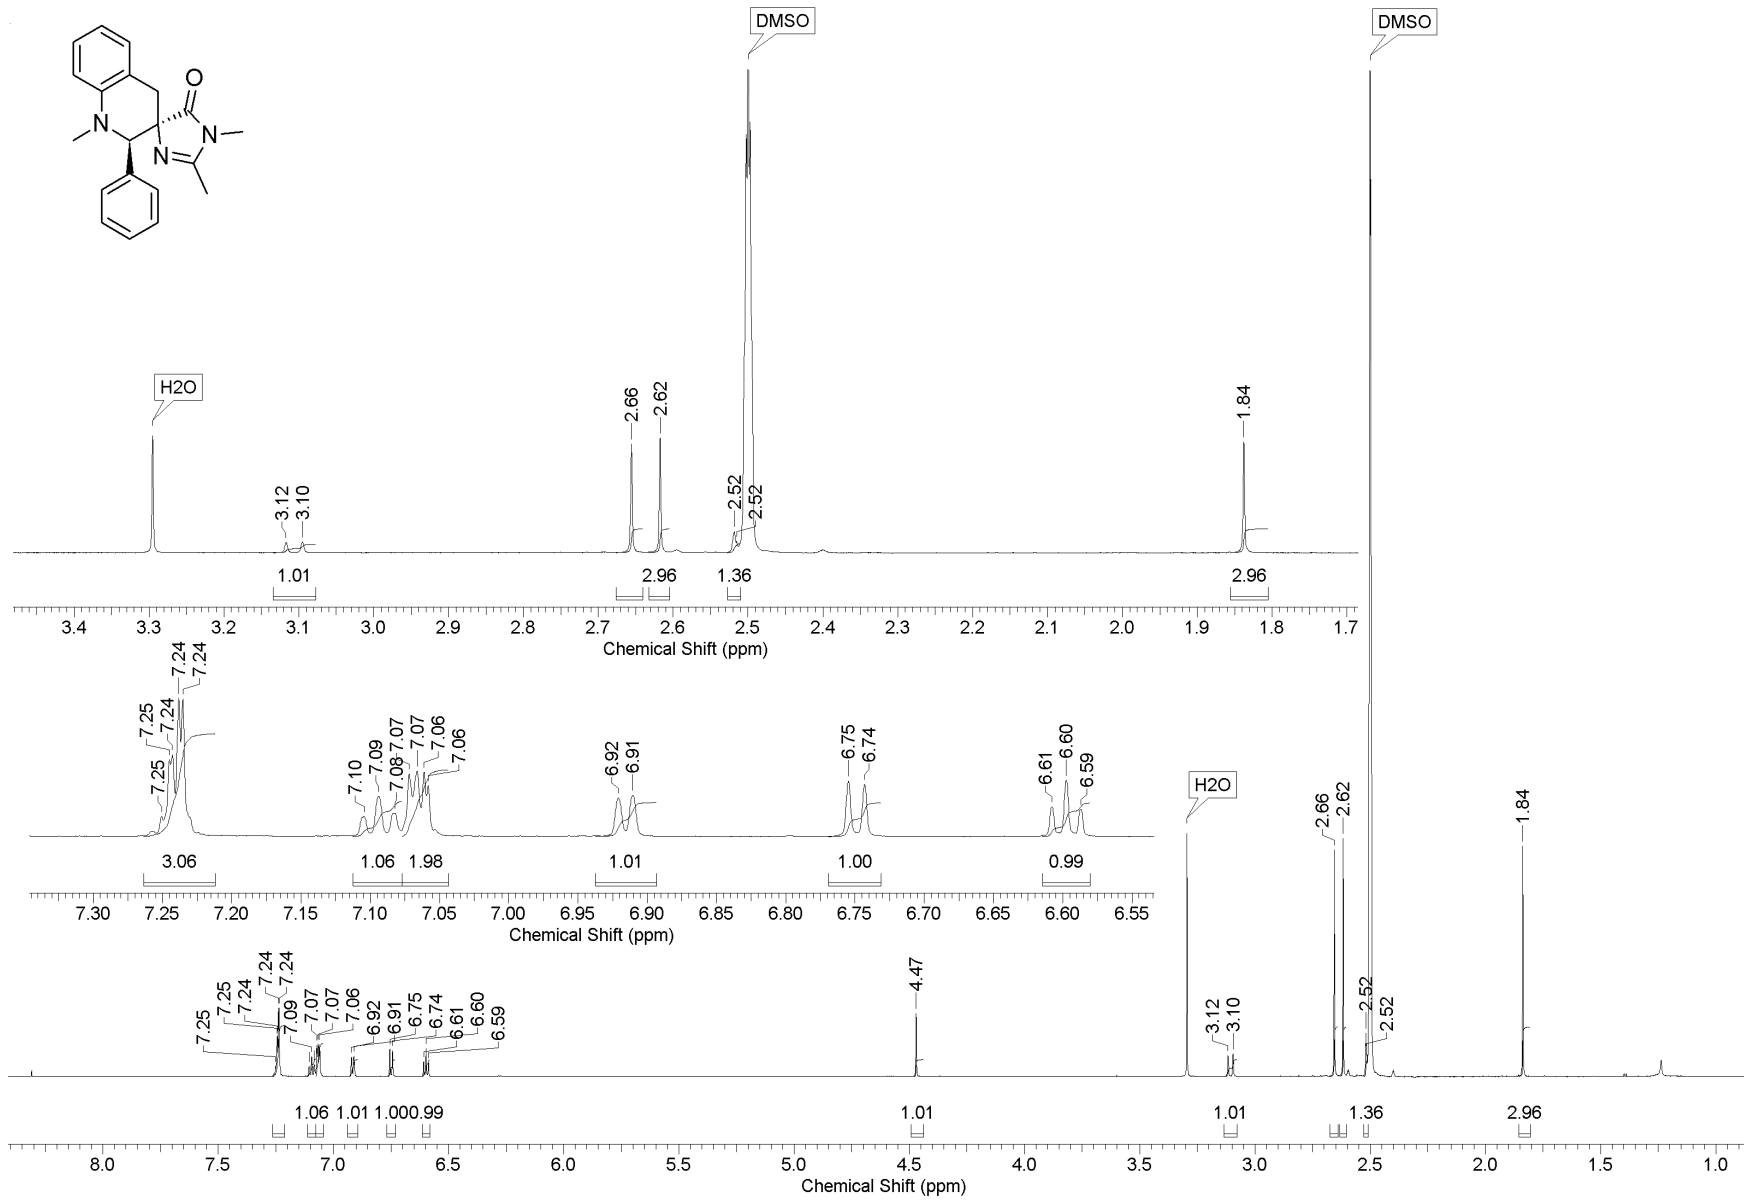

S143

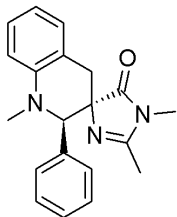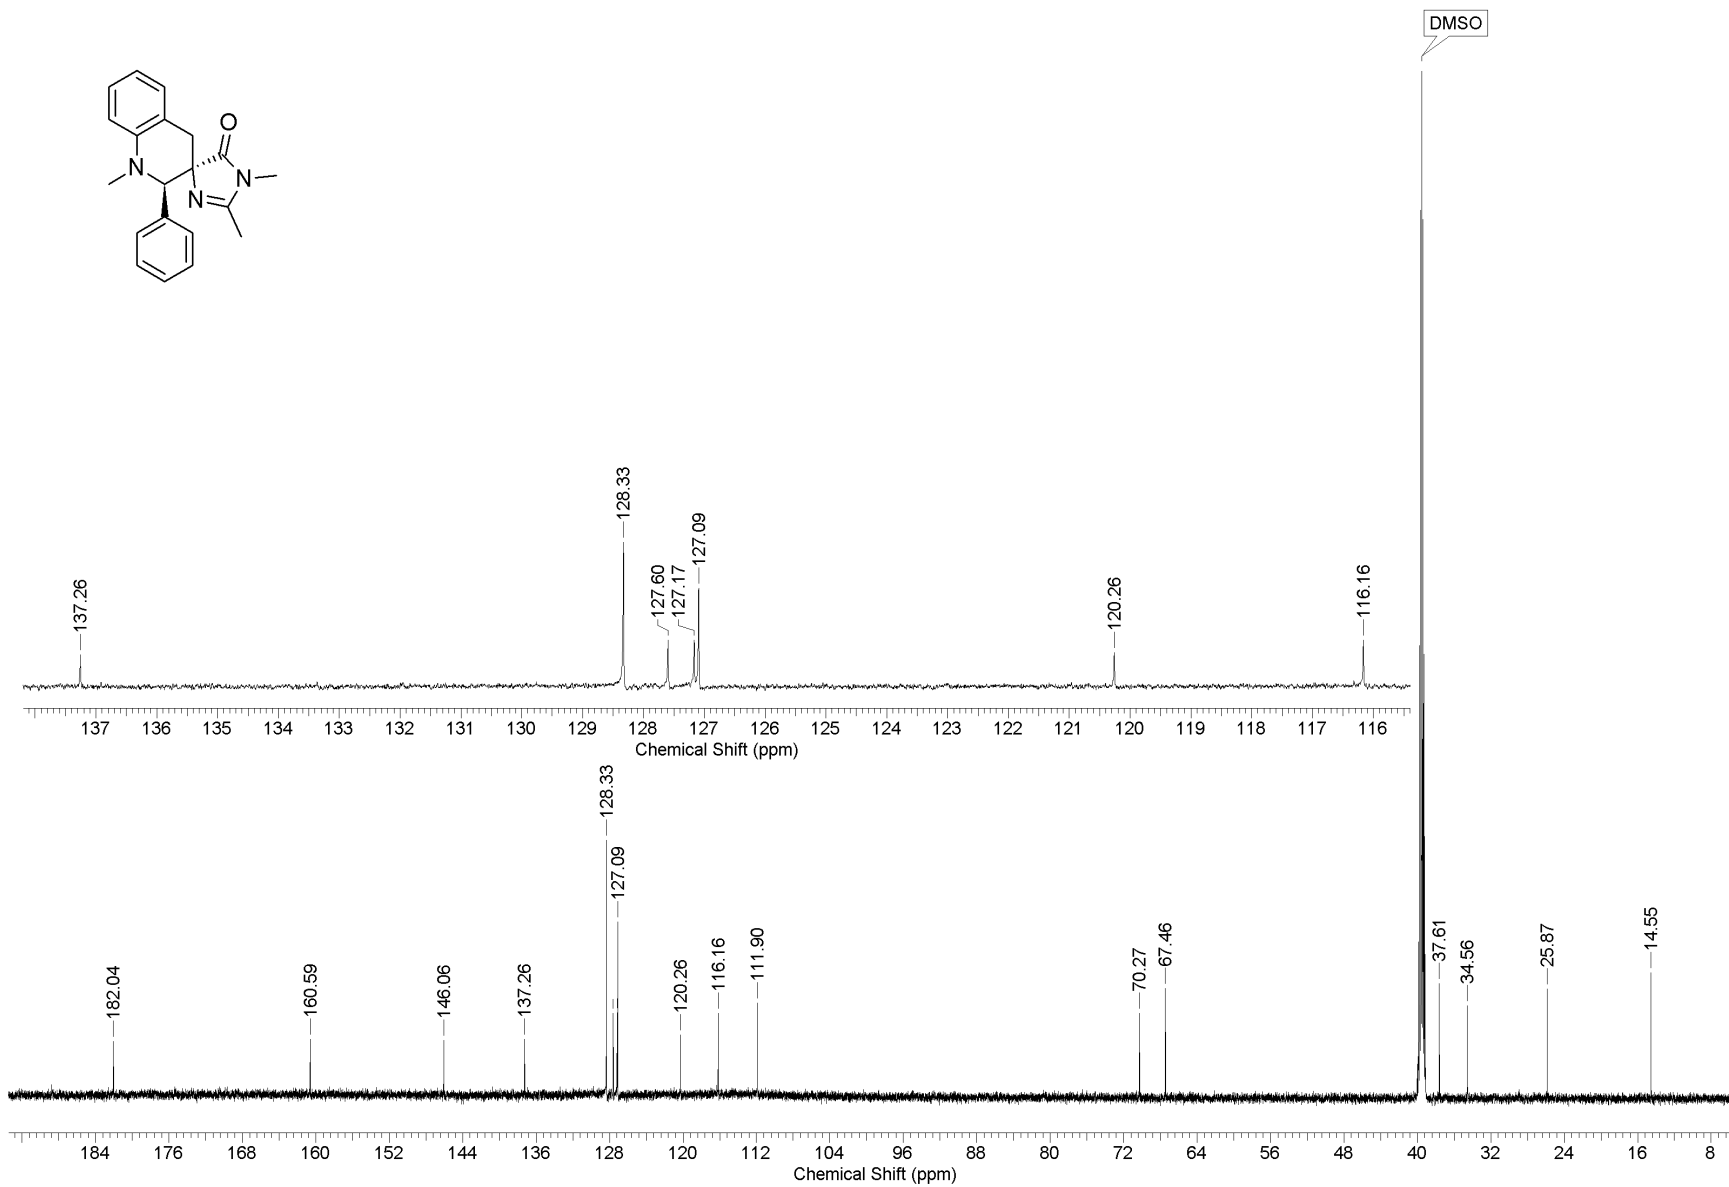



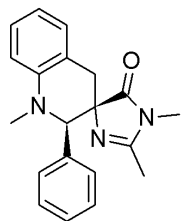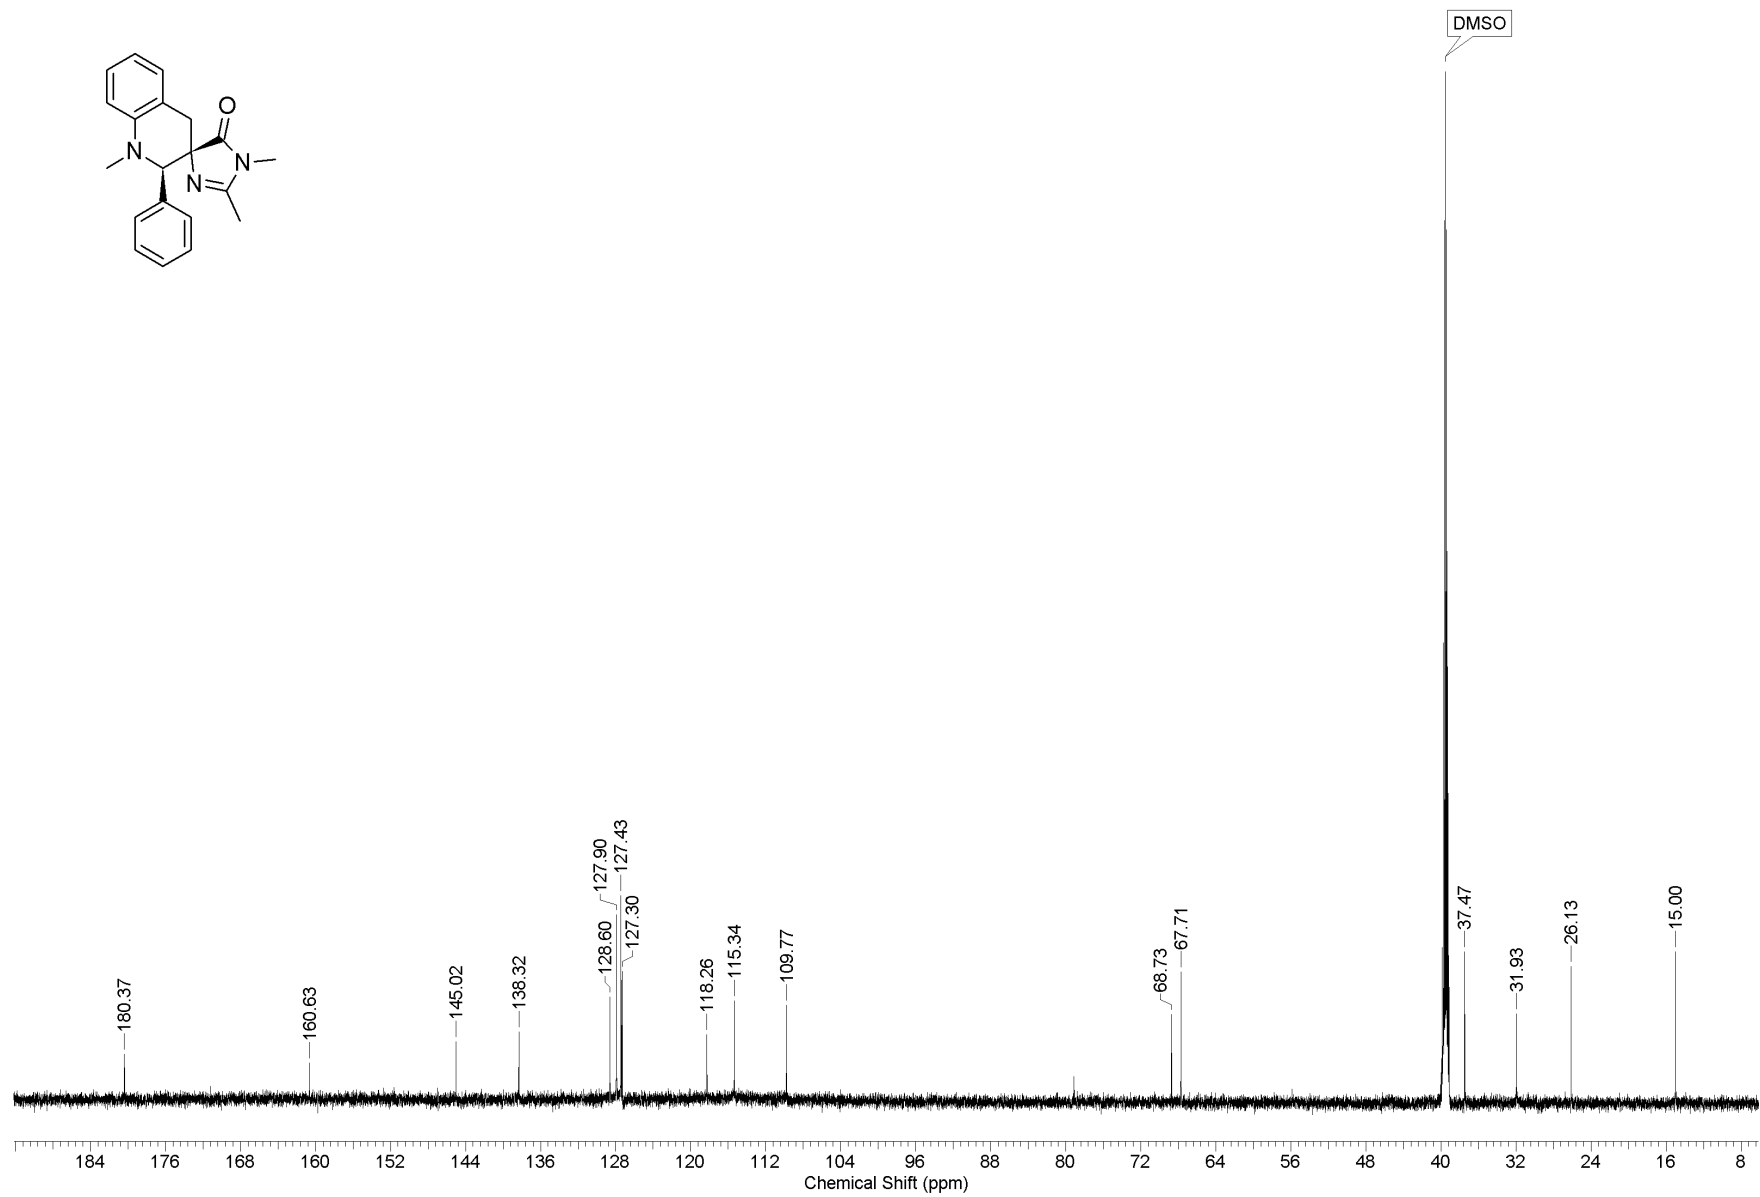

S145

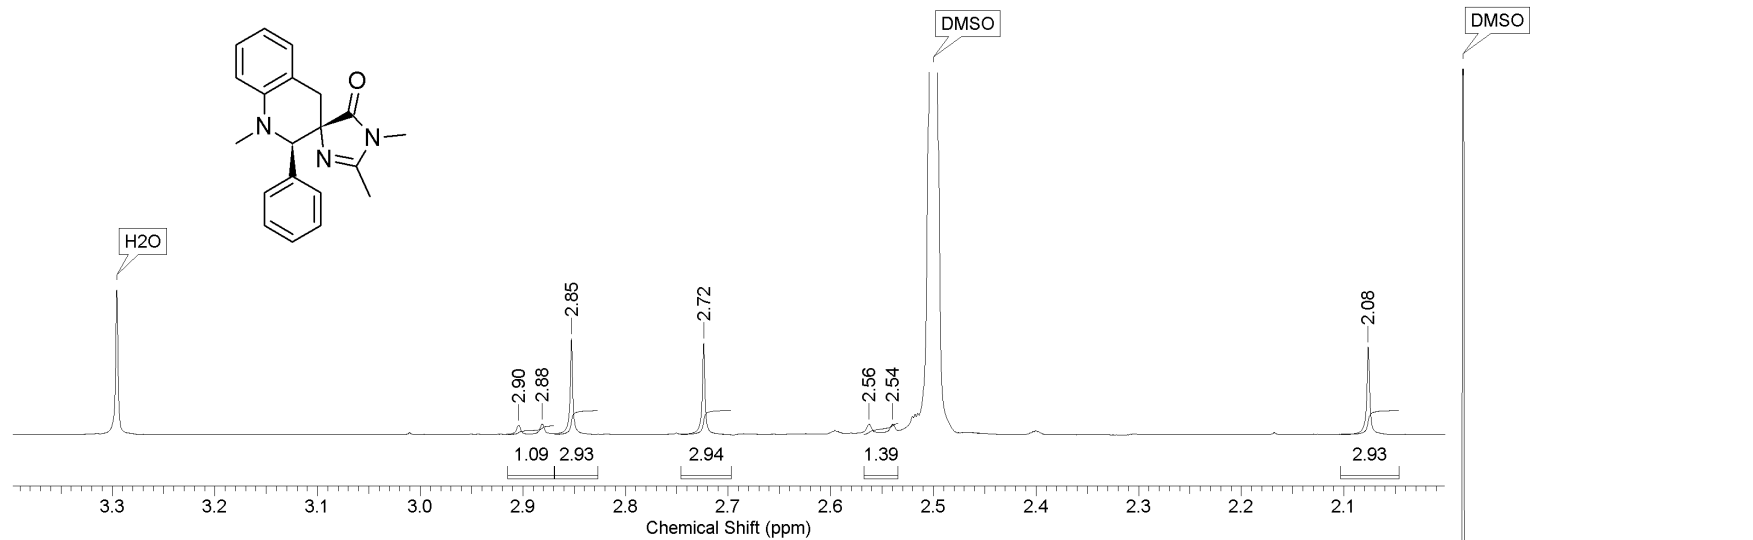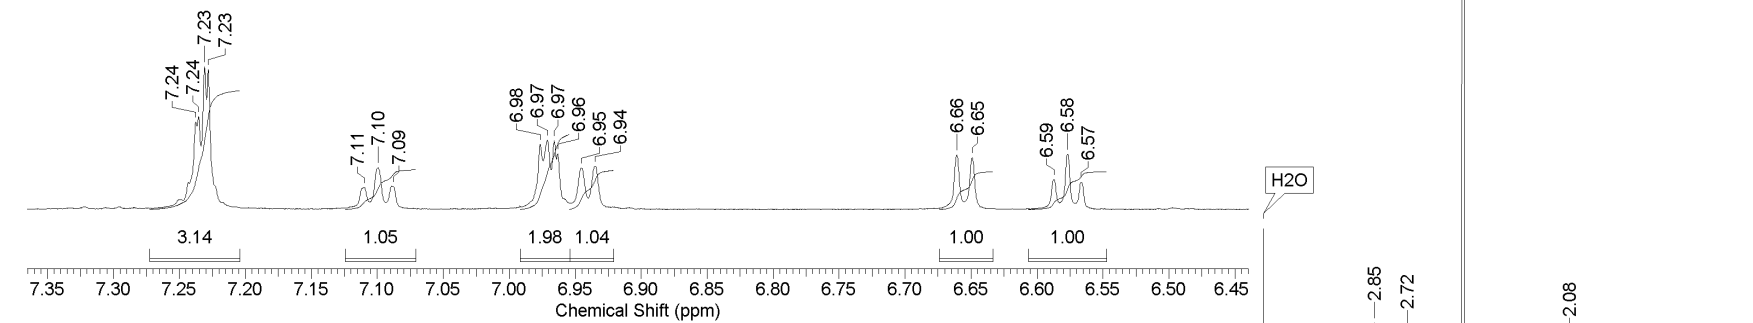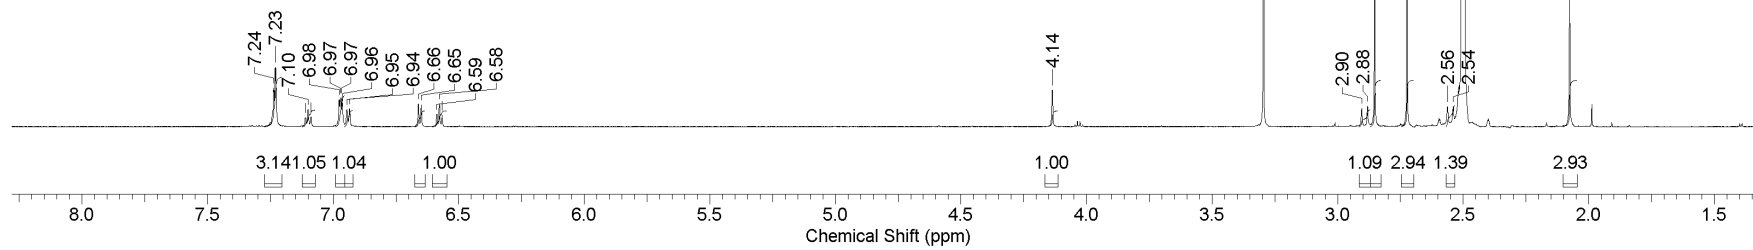

S146

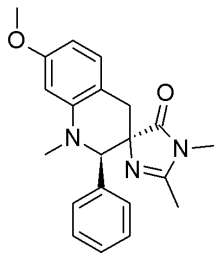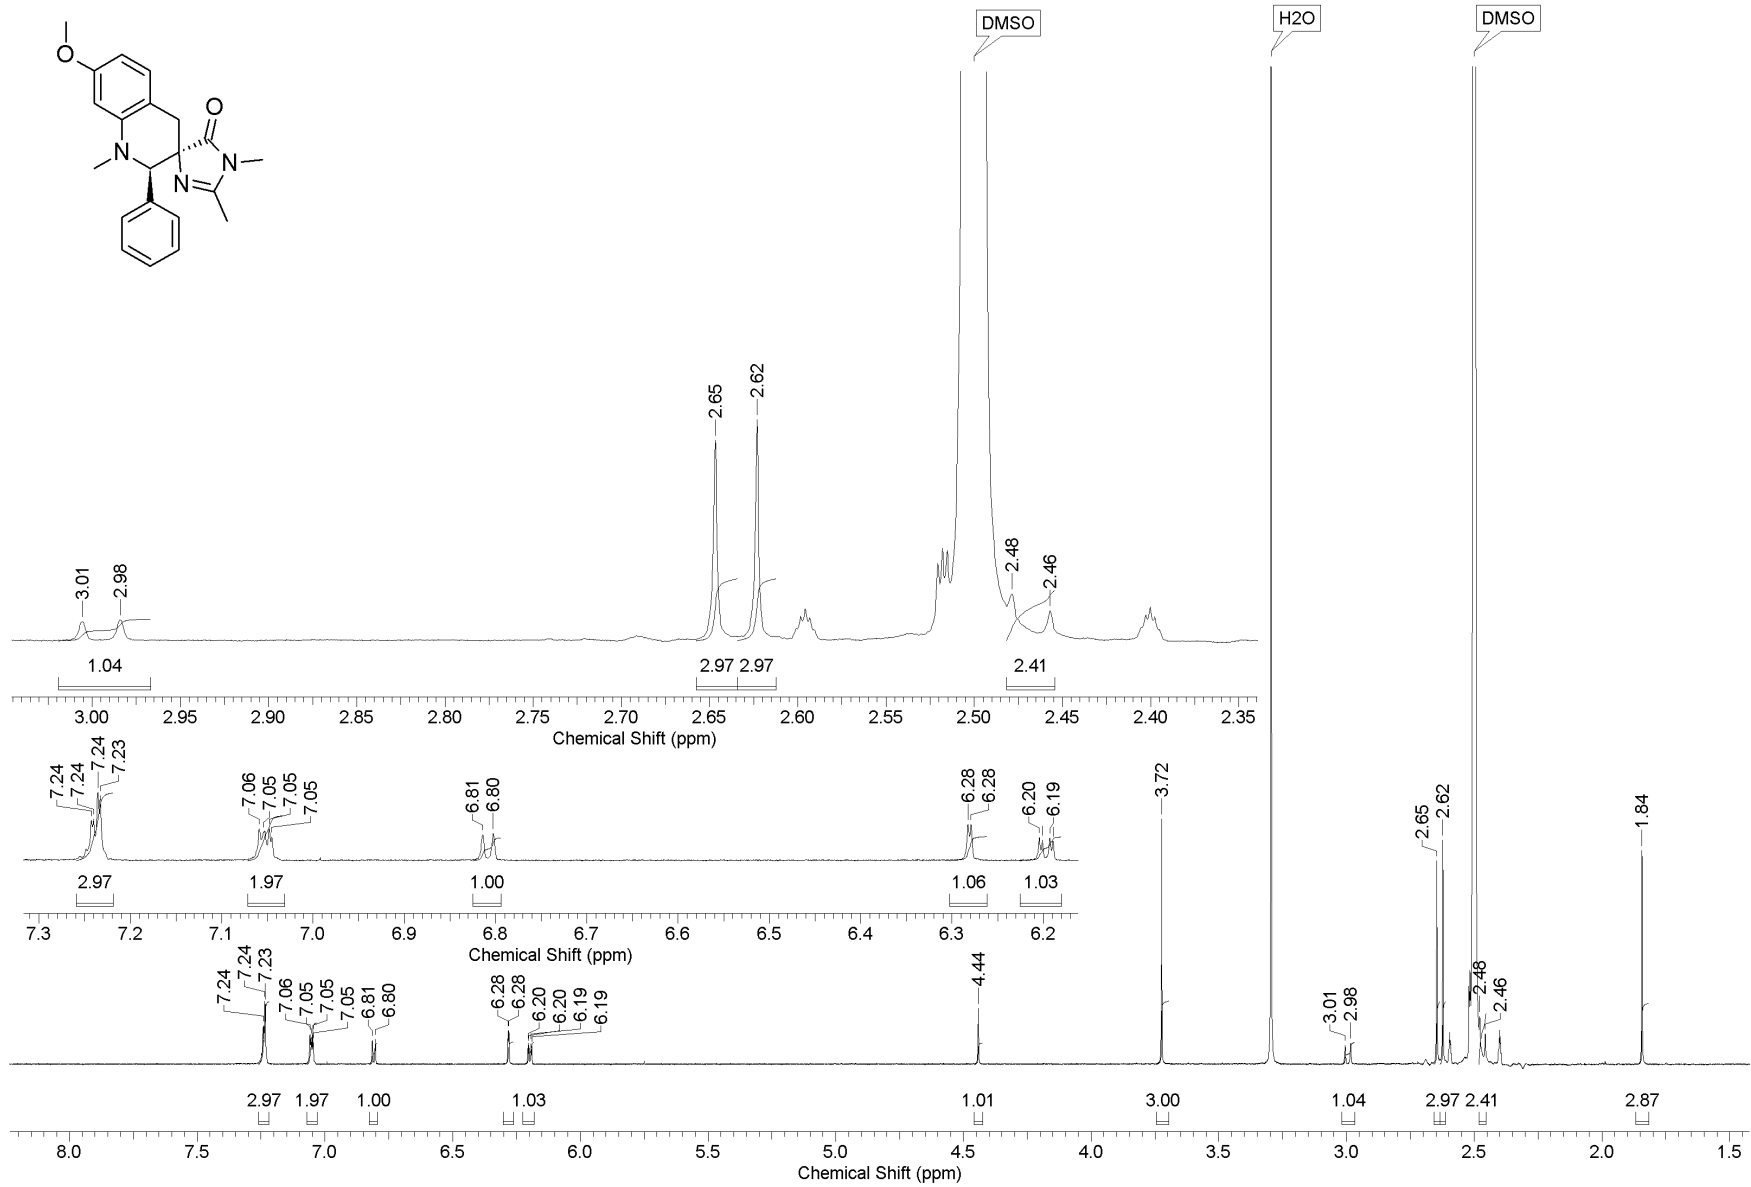

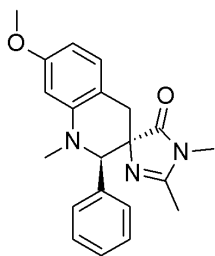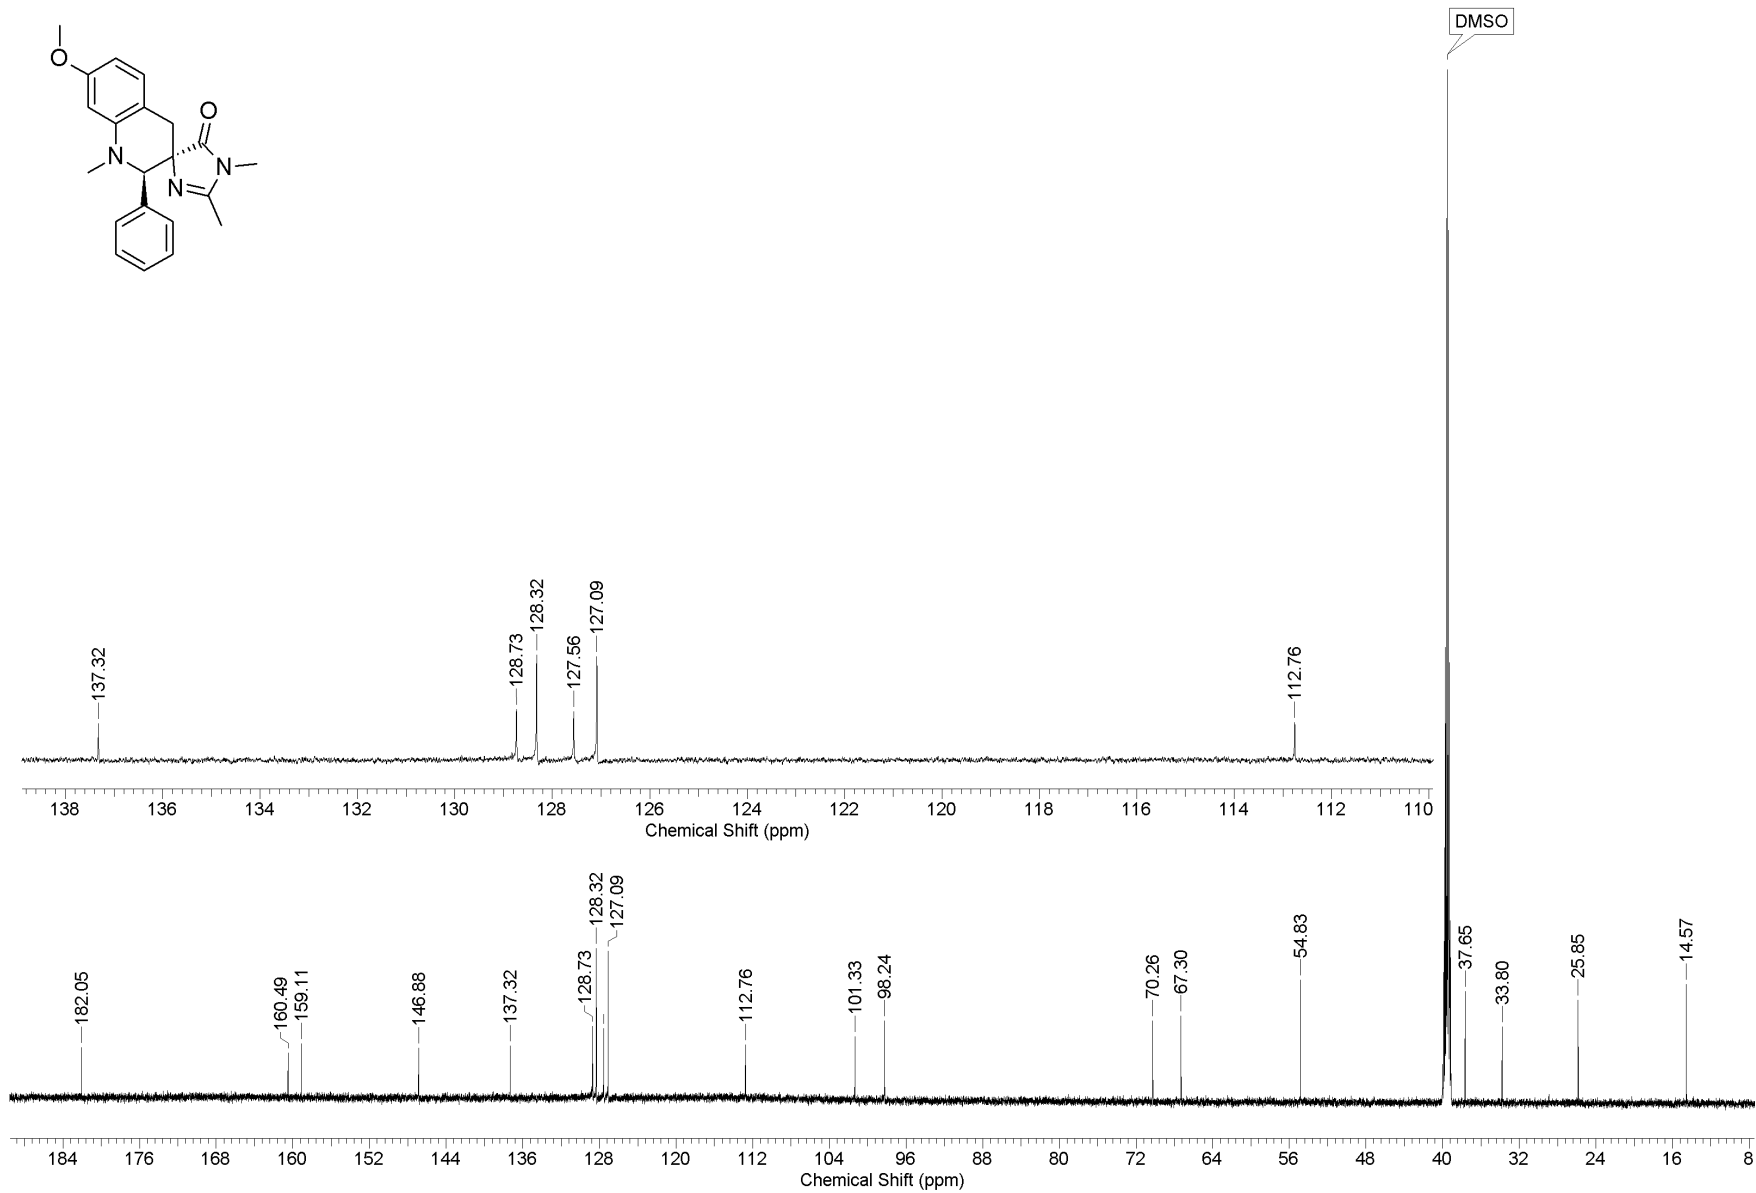

S148

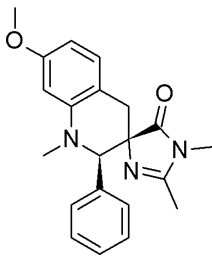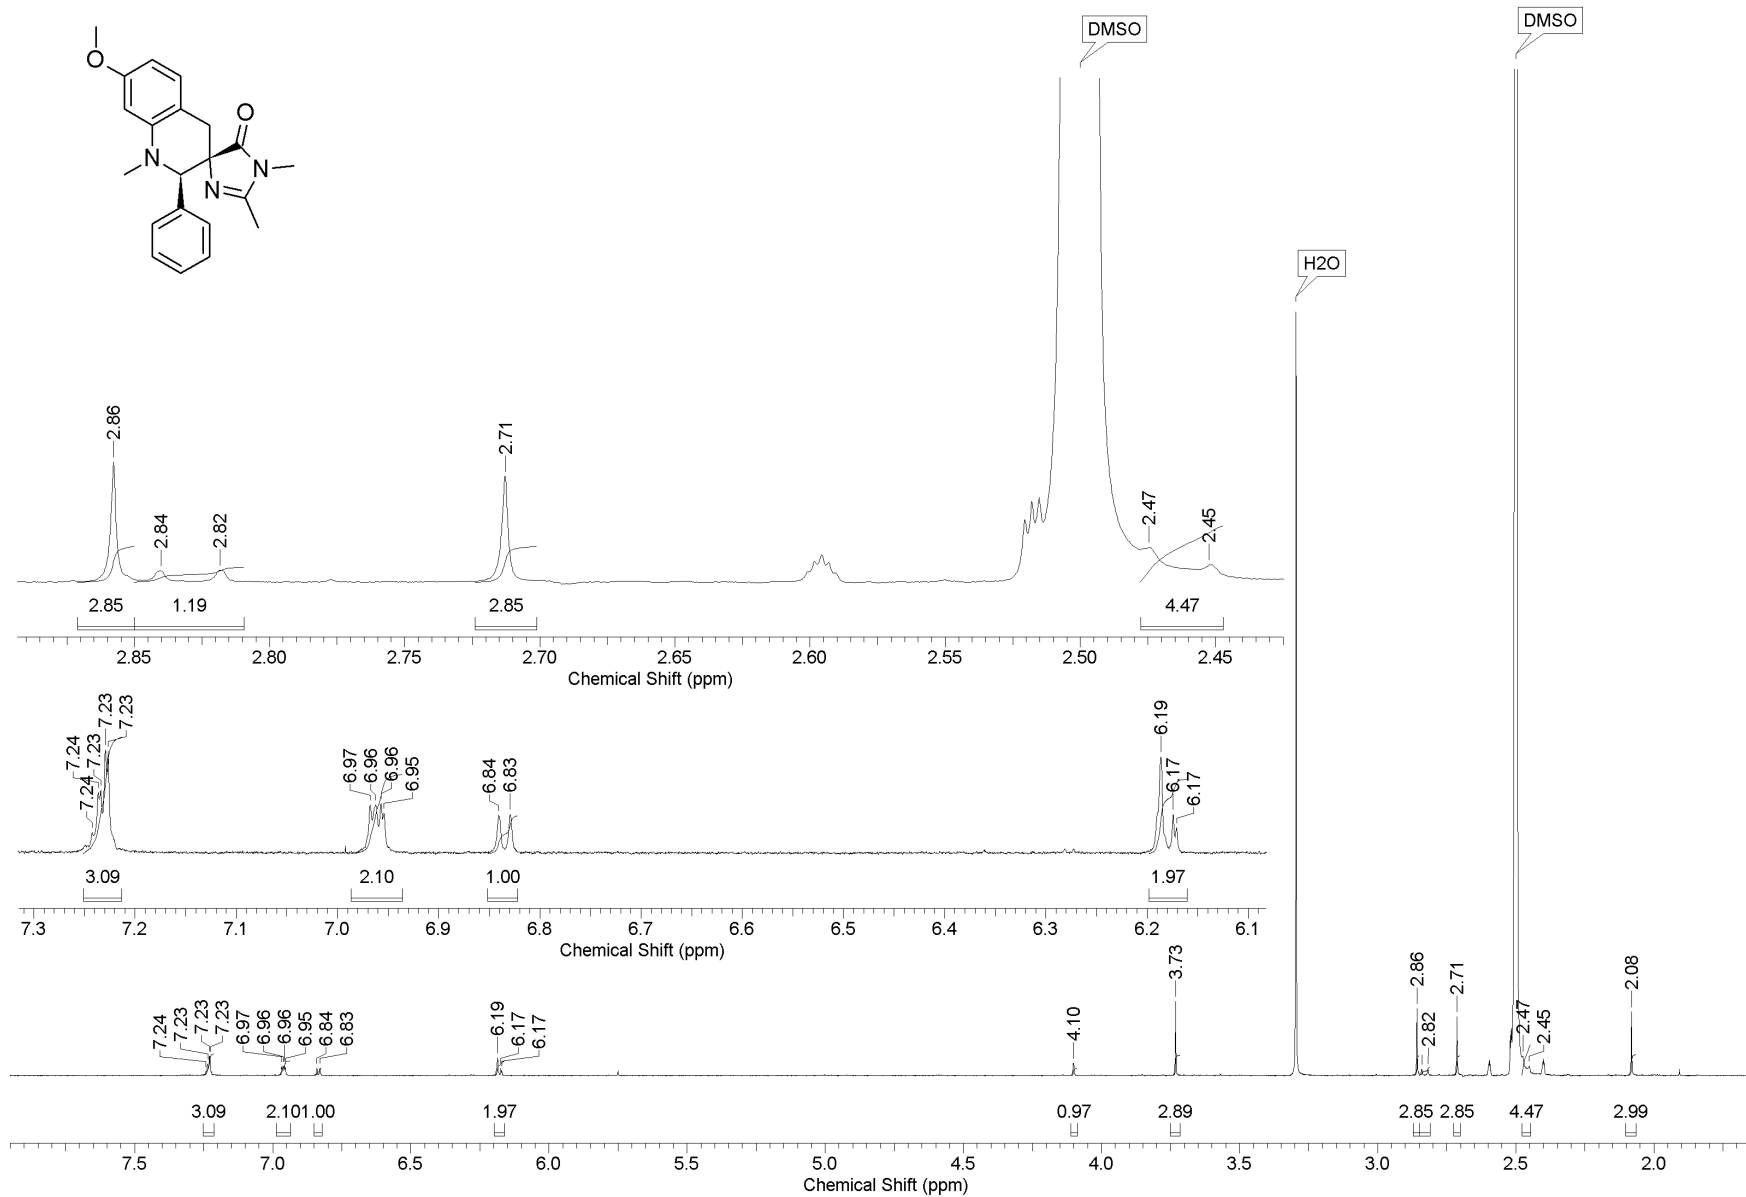

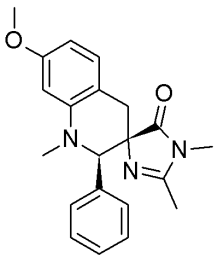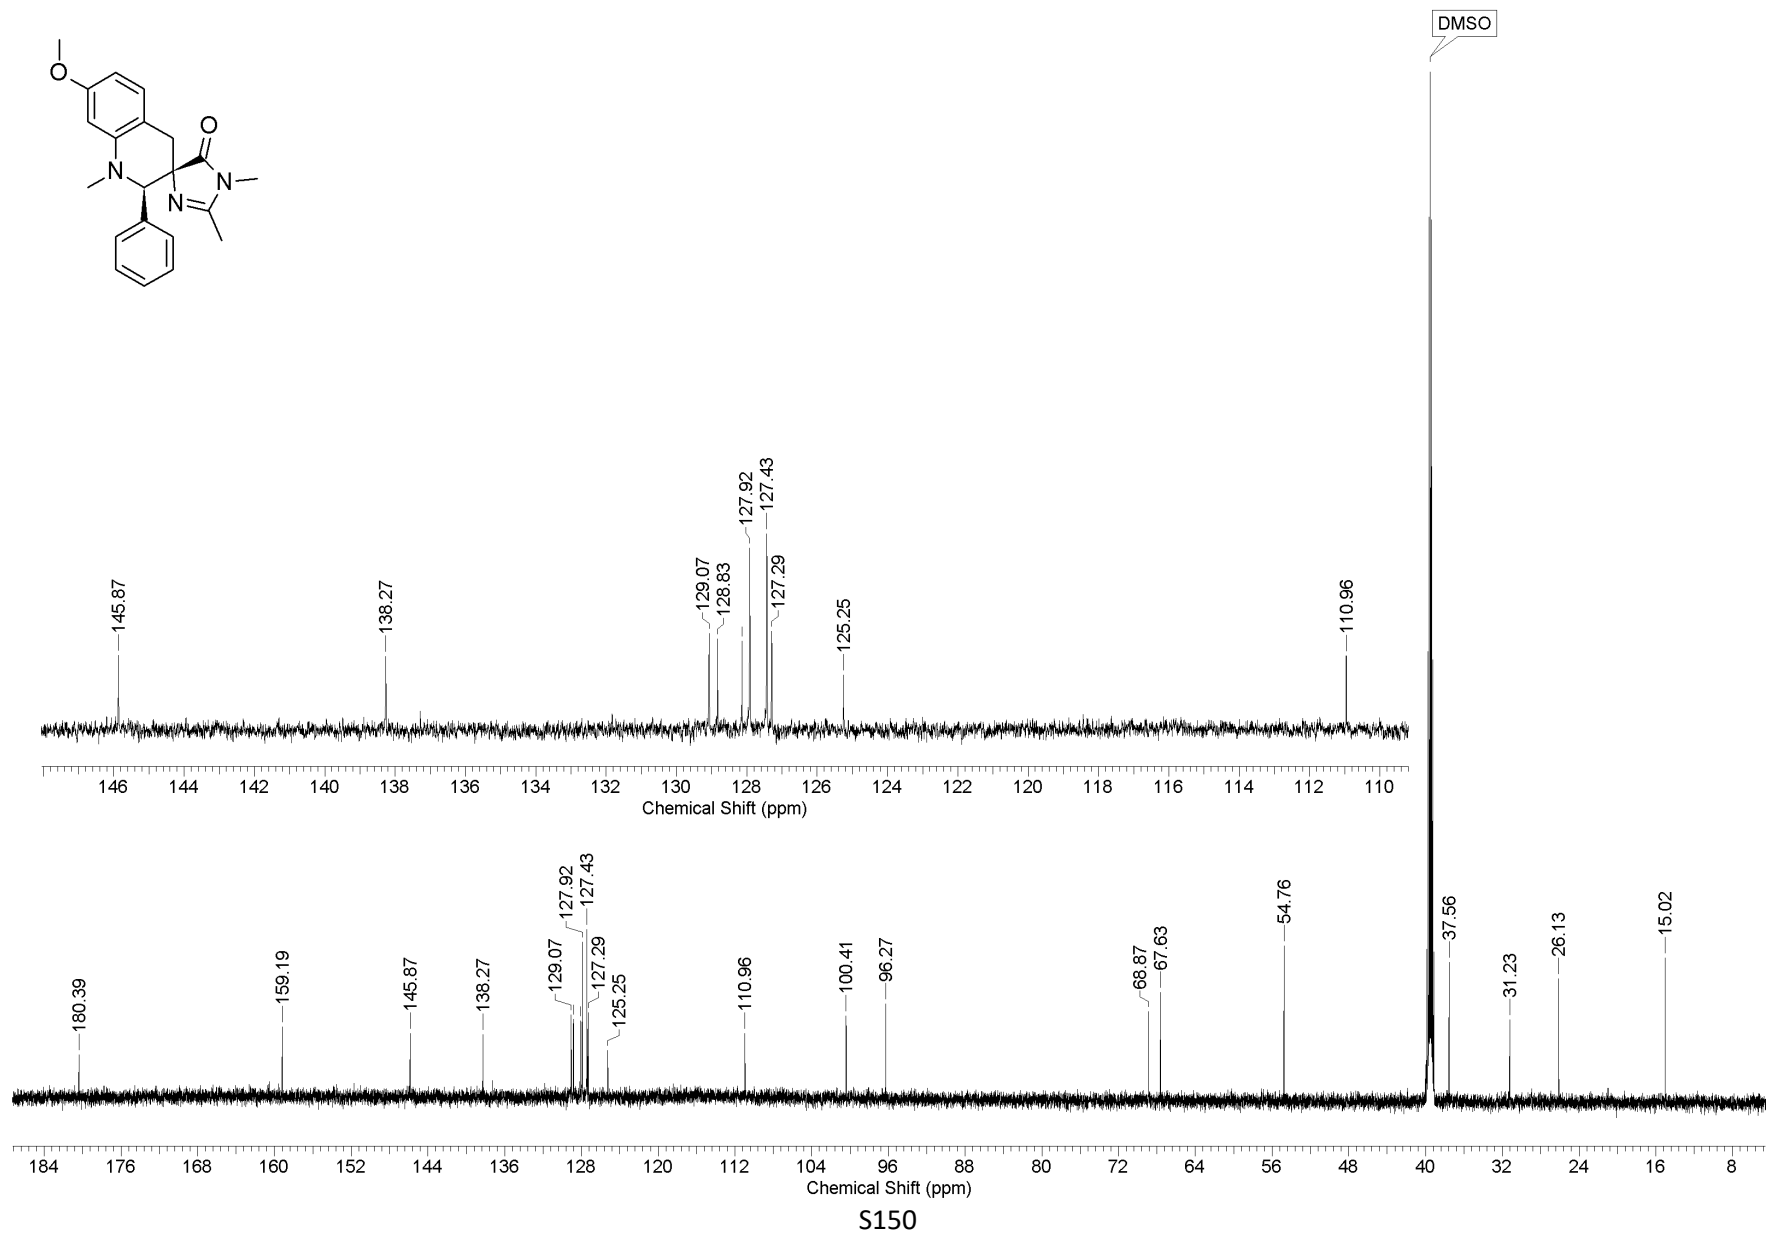

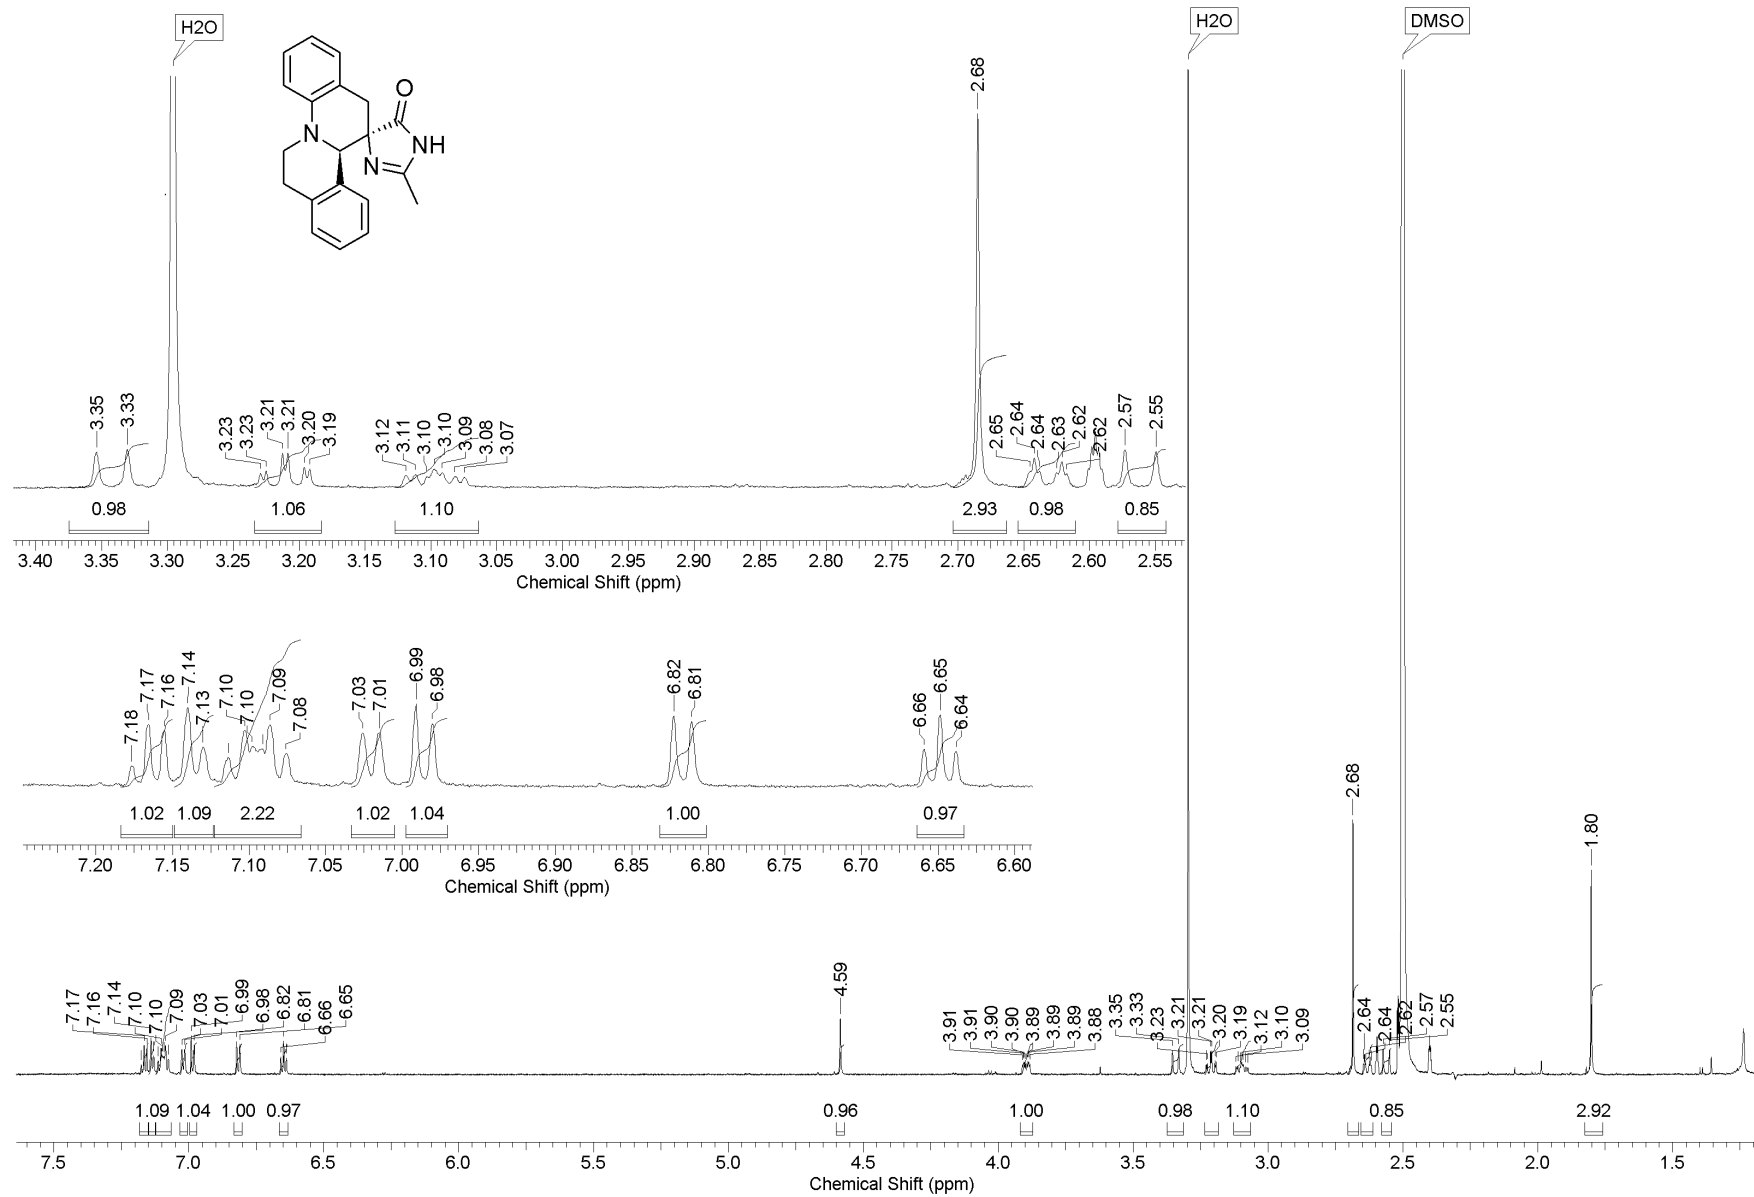

S151

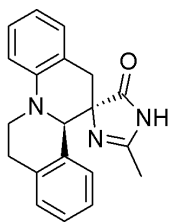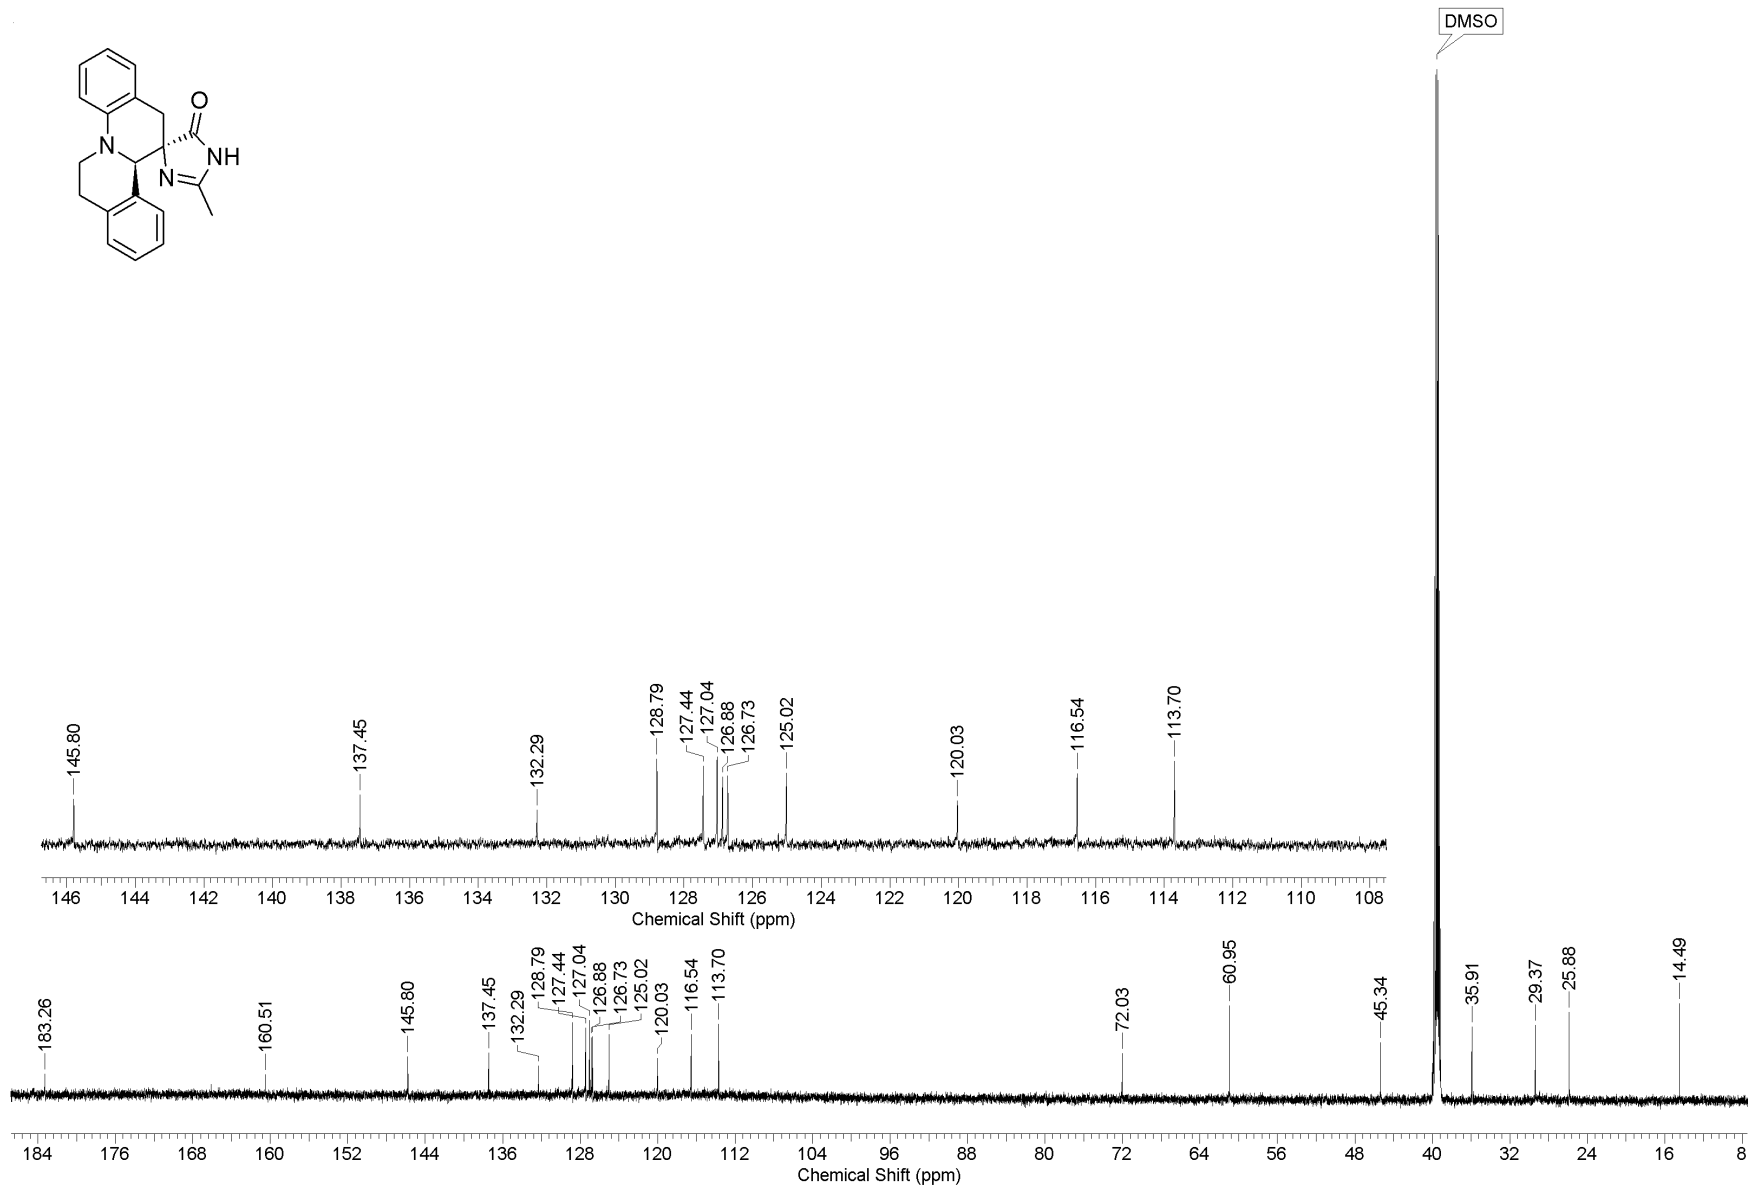

S152



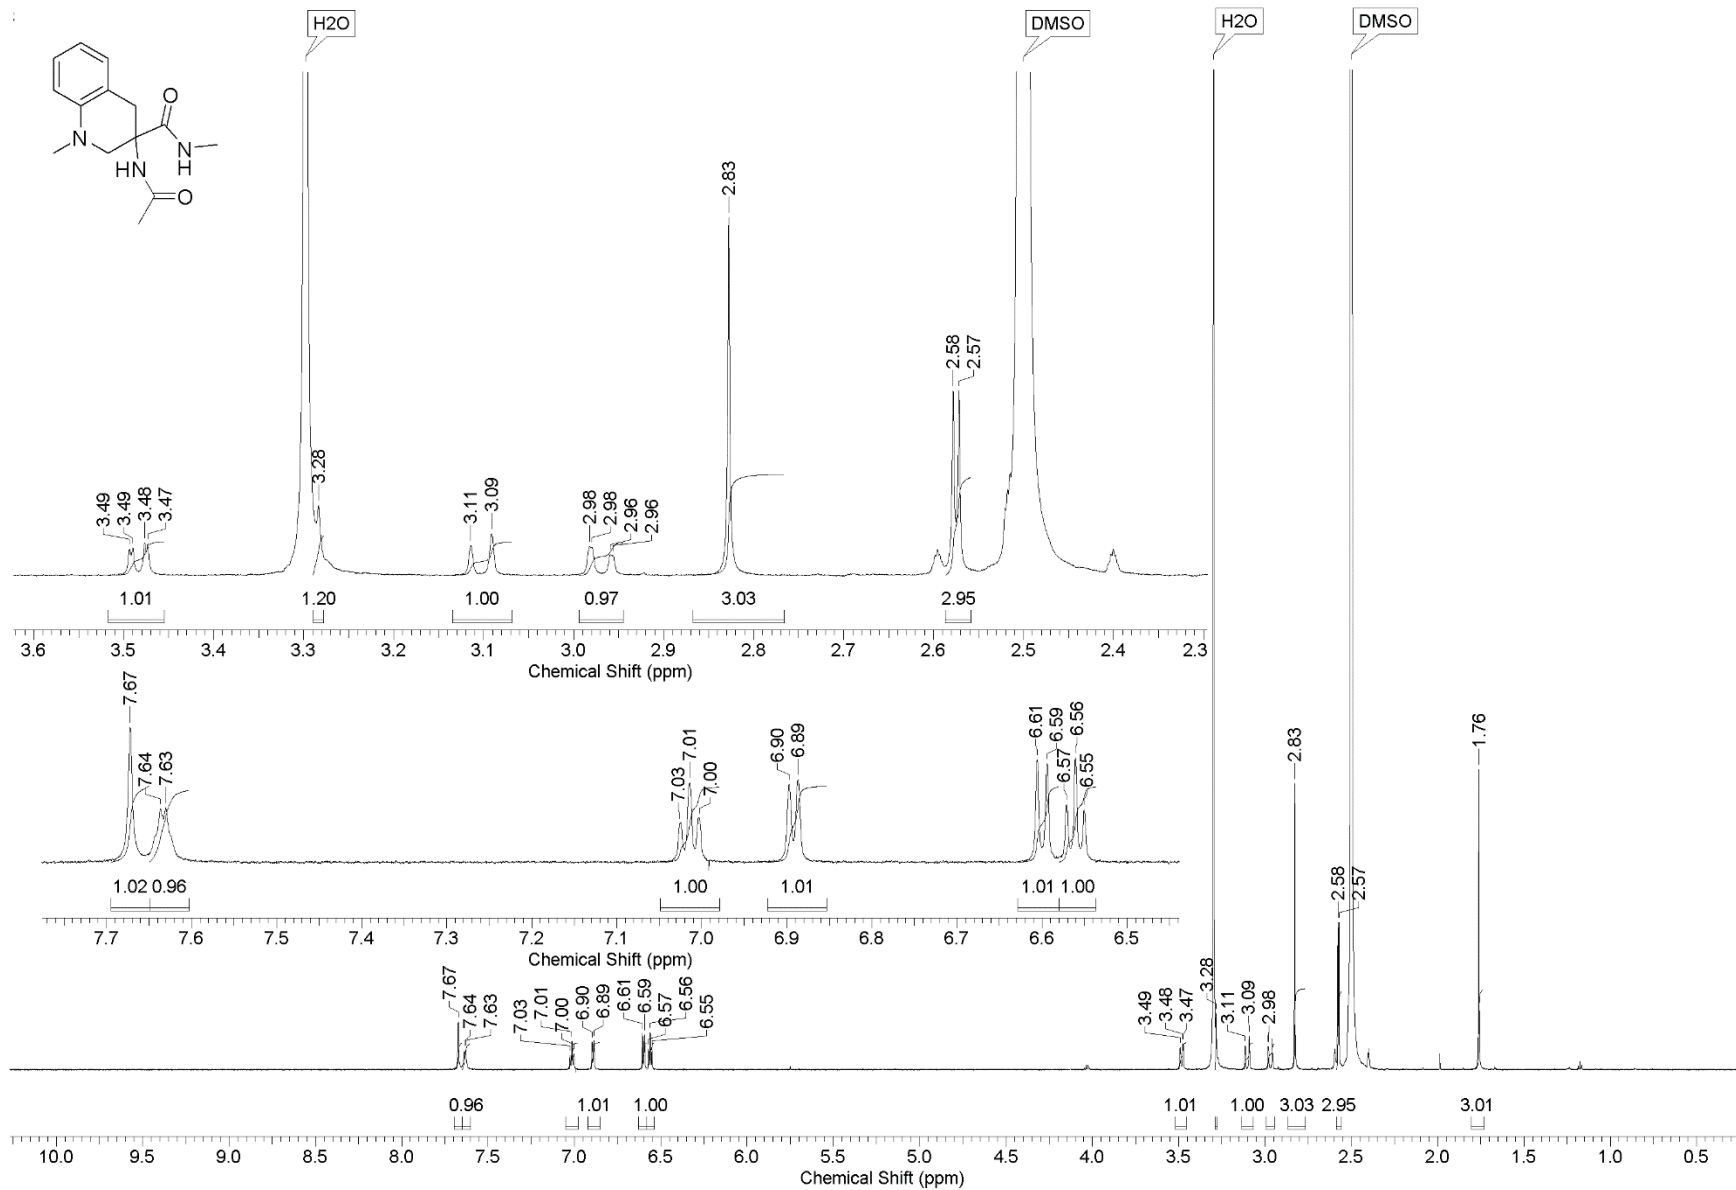

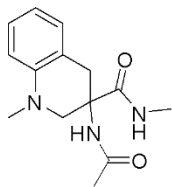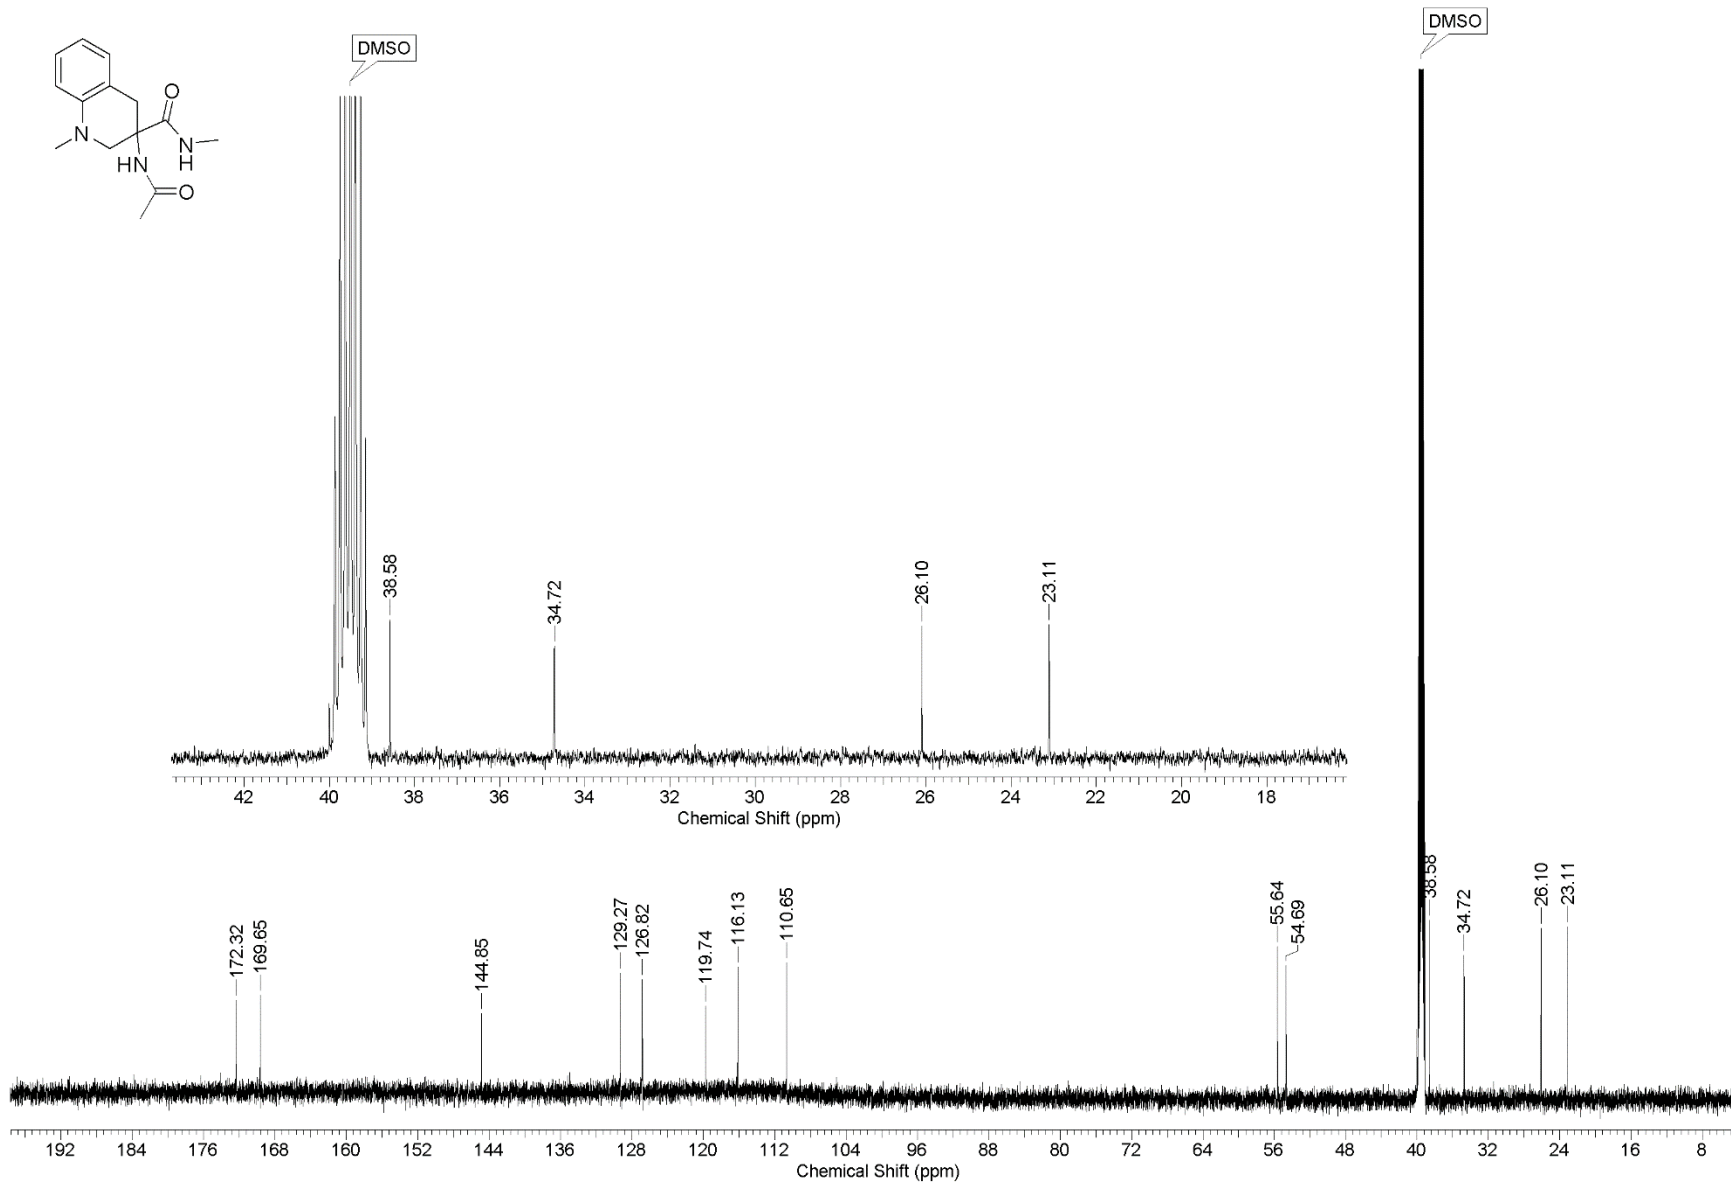

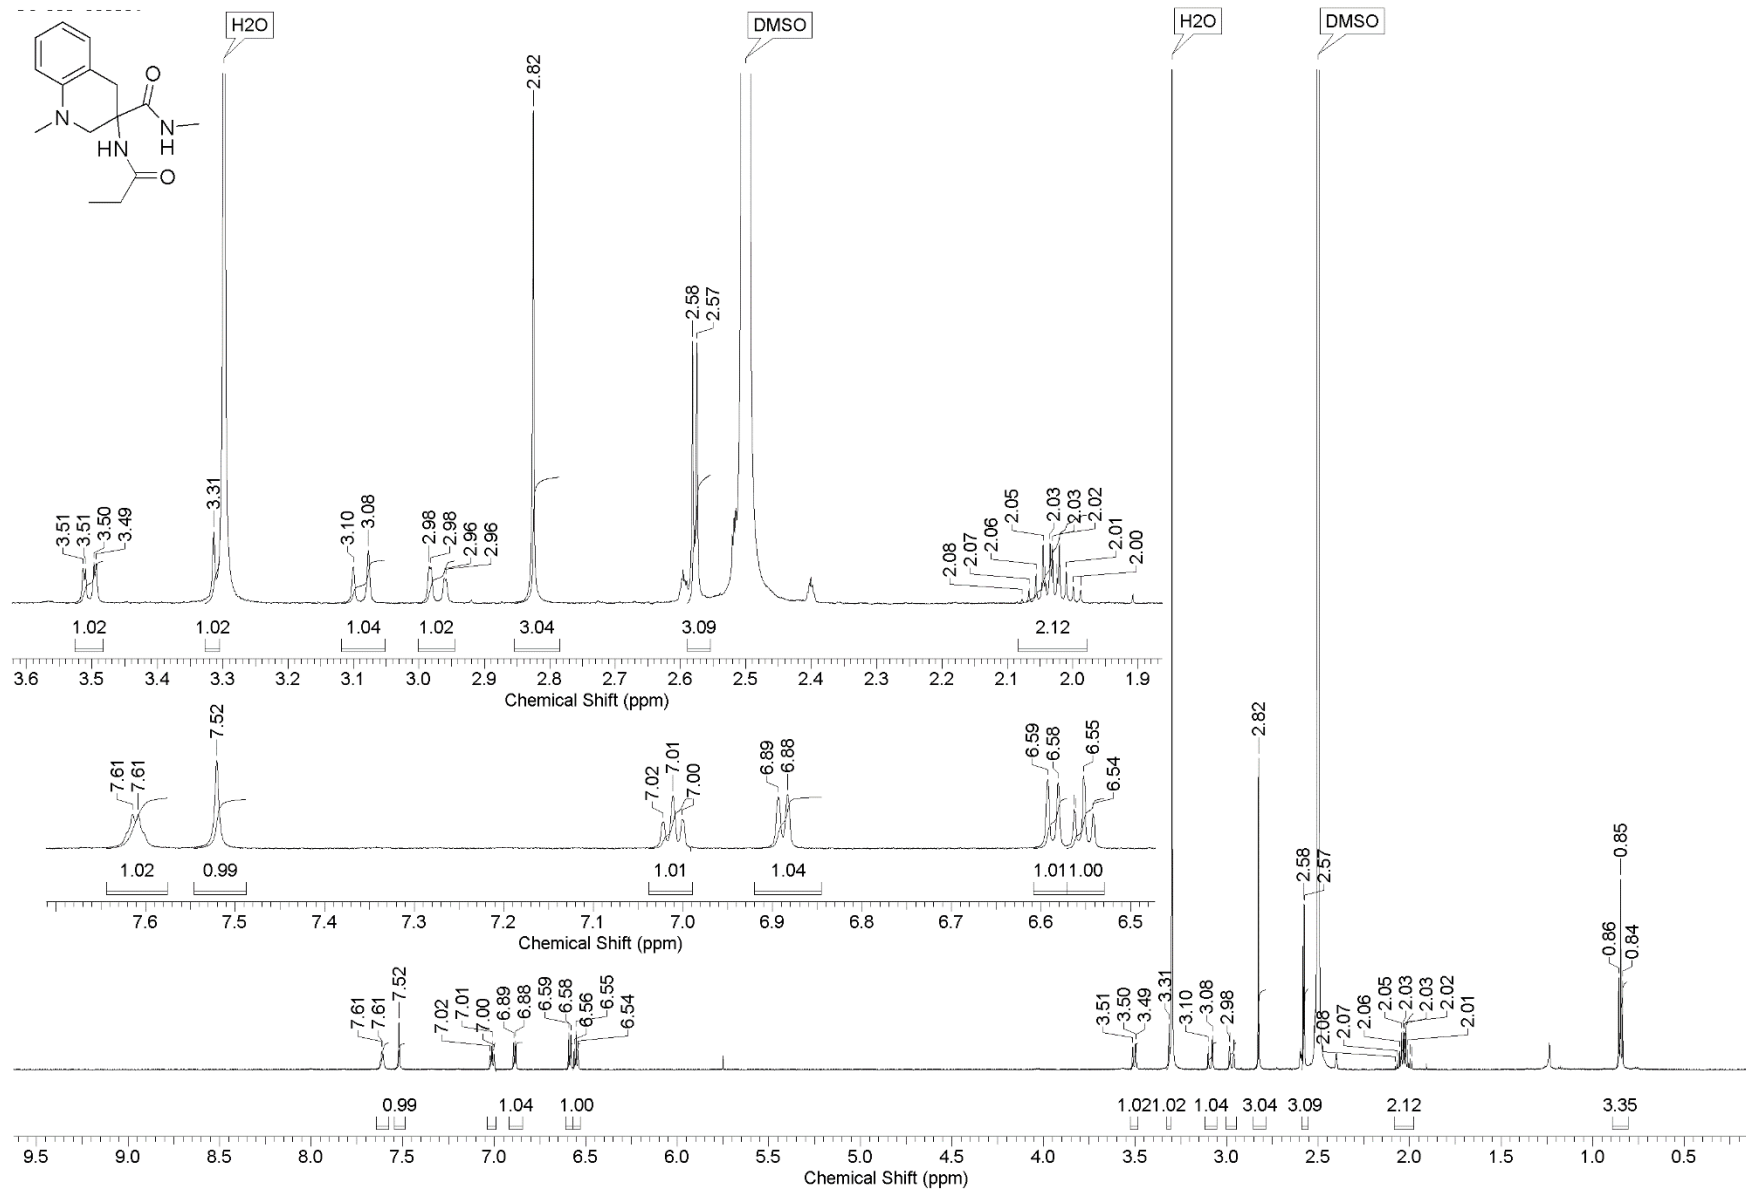

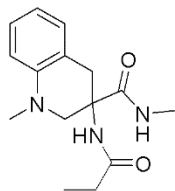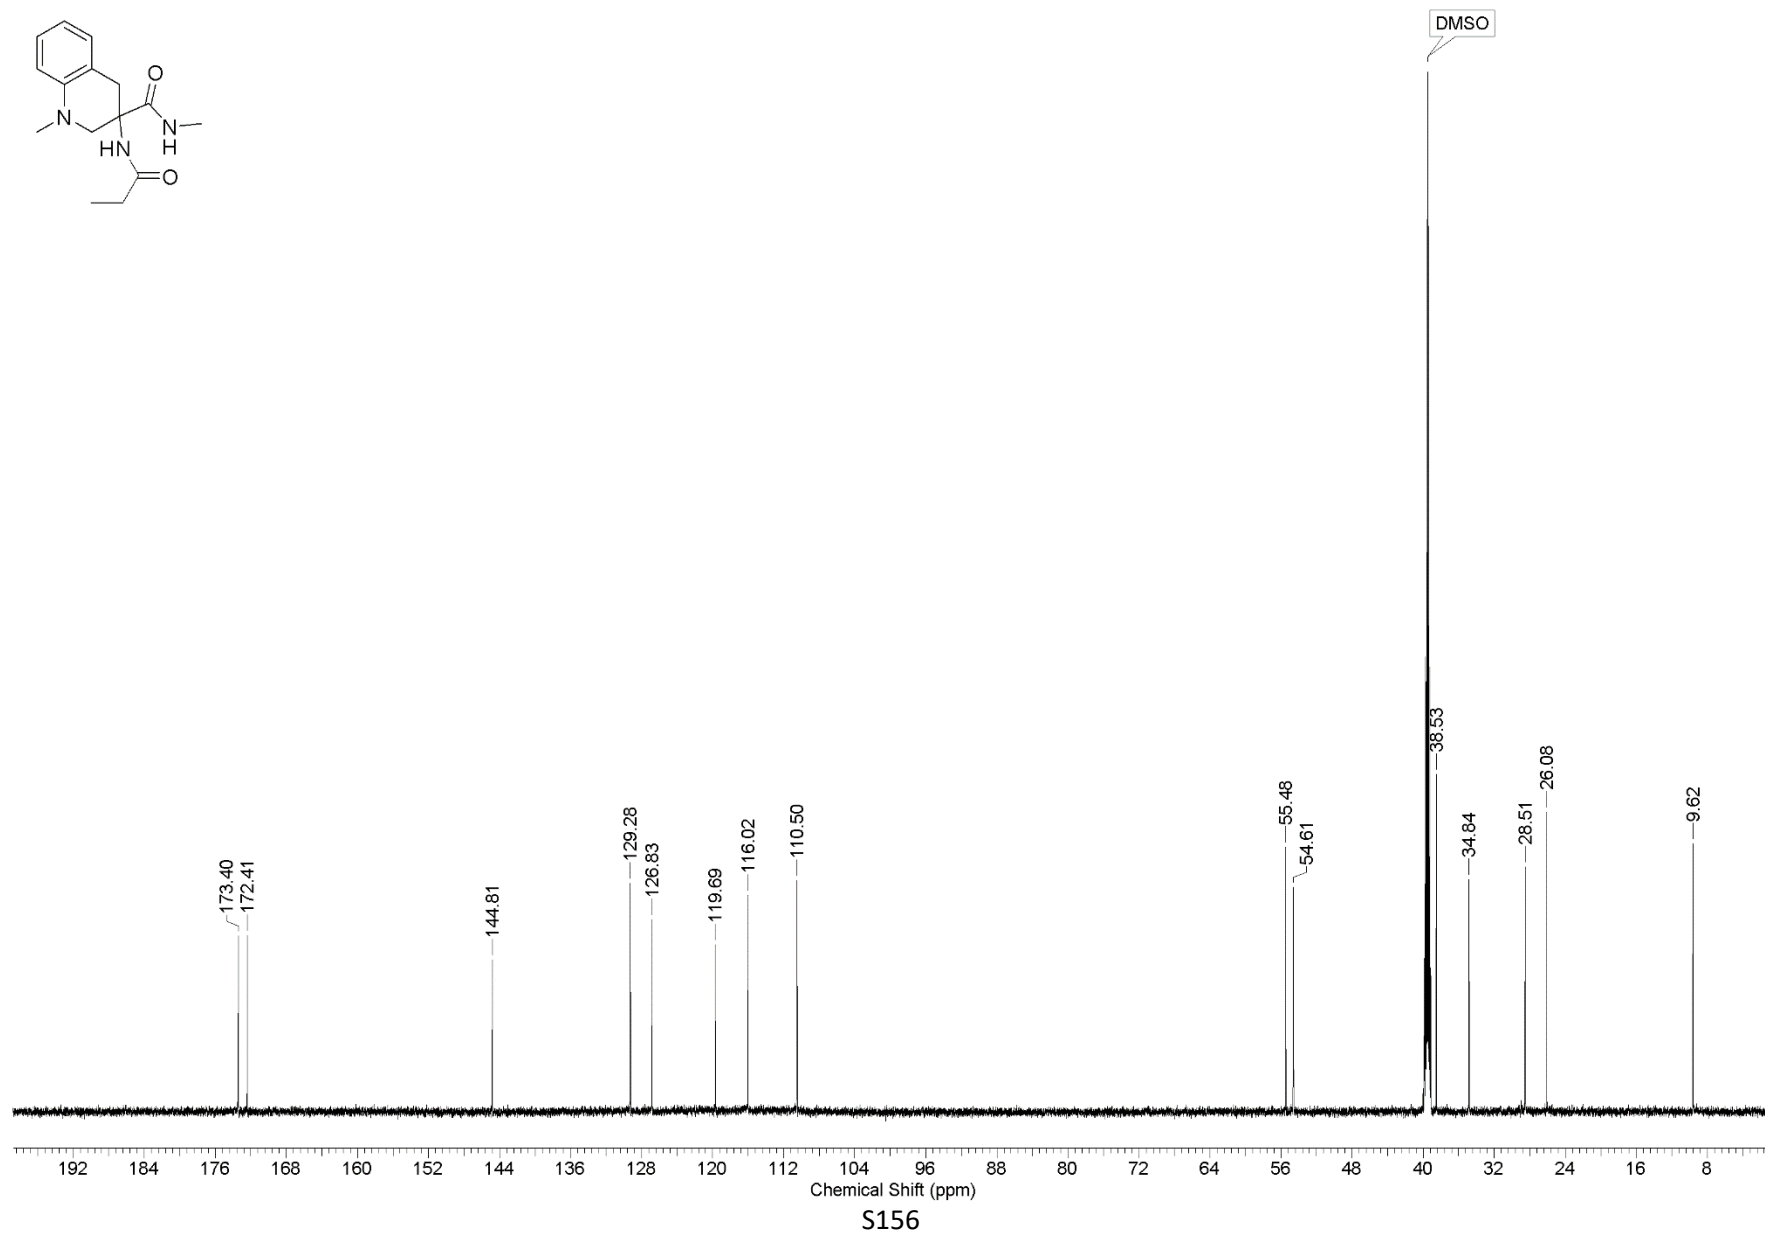

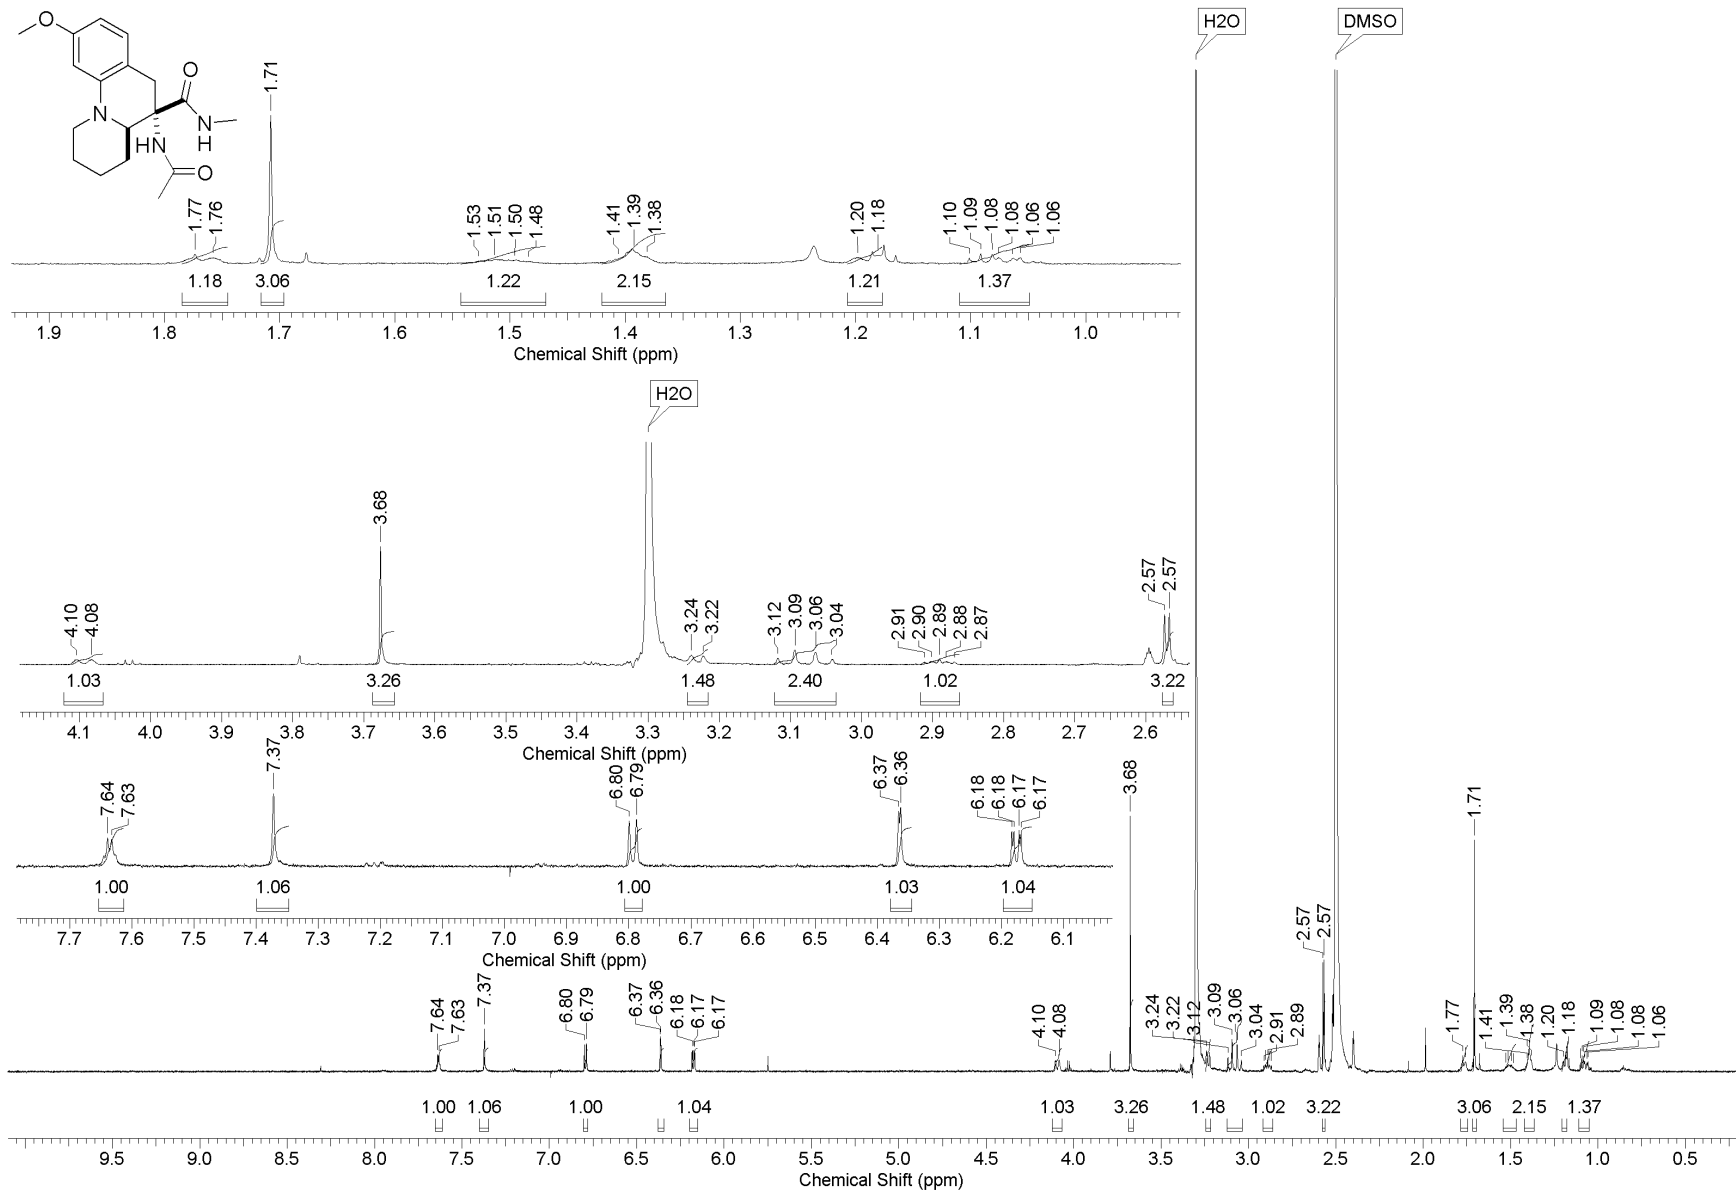

S157

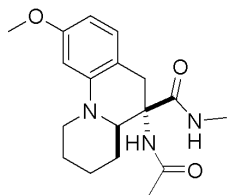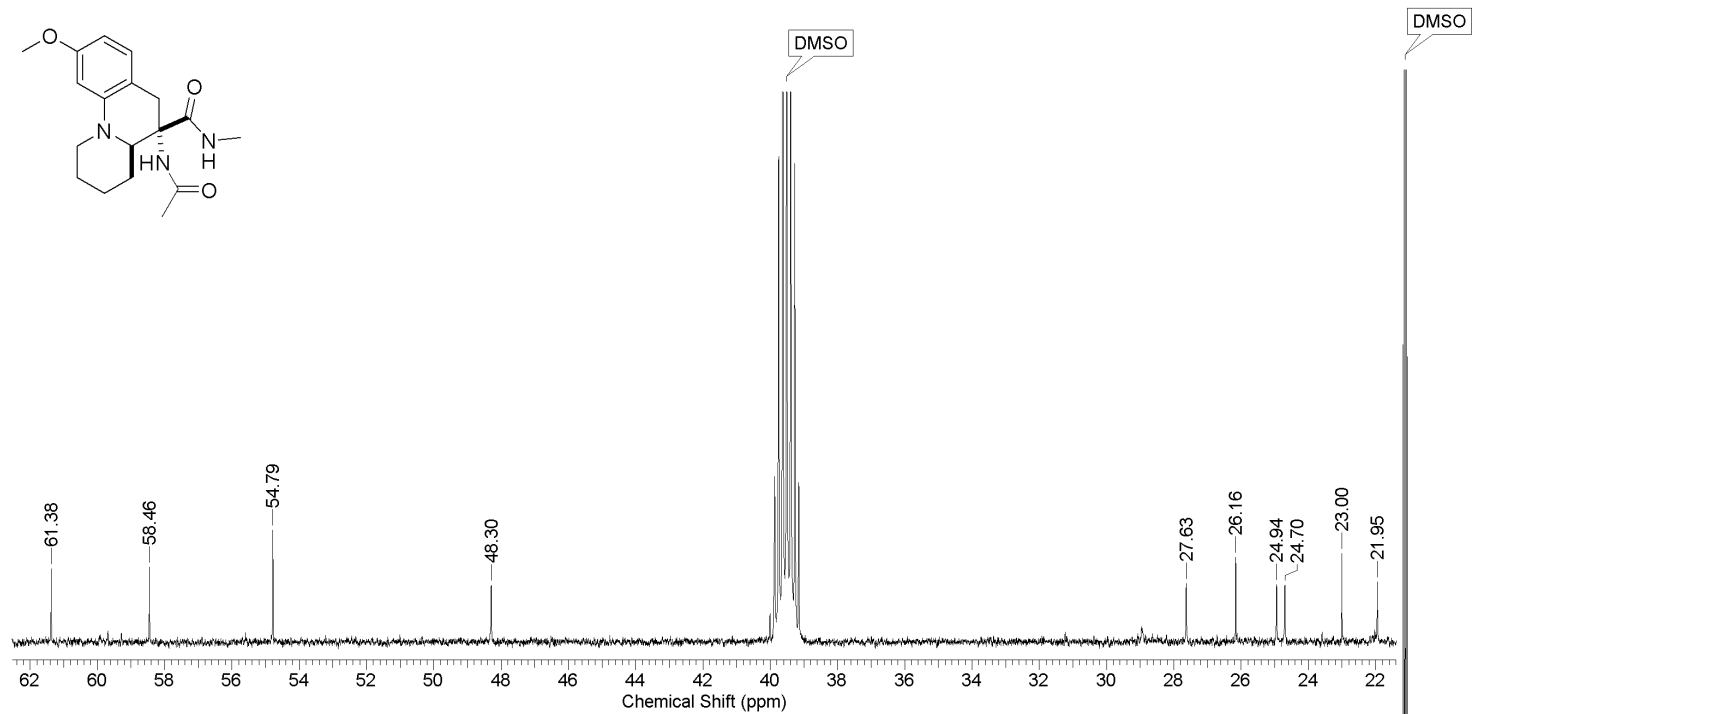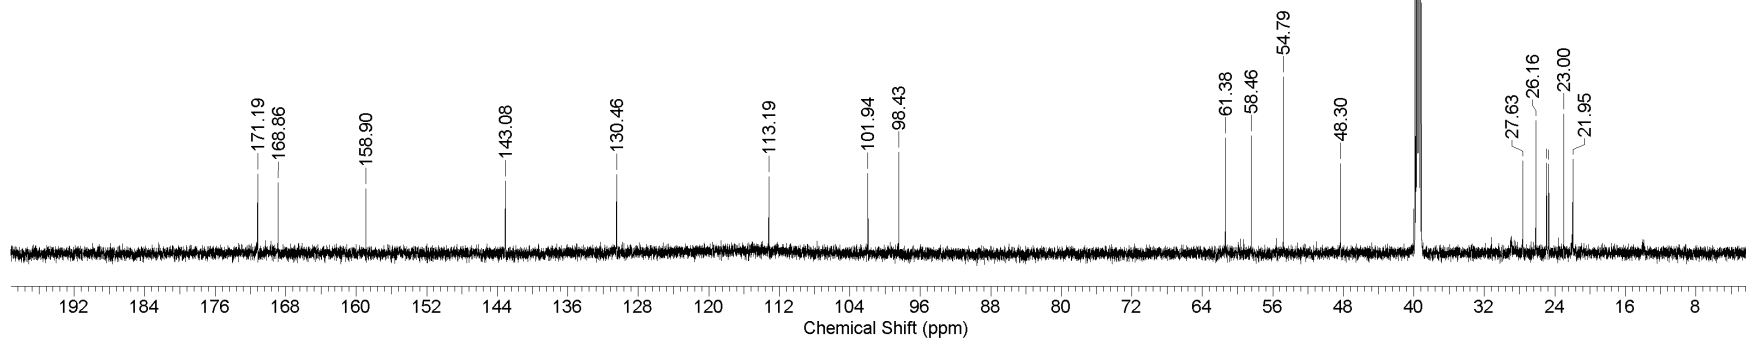

S158
